# Supplementary material for: Quantitative RNA-seq meta-analysis of alternative exon usage in C. elegans
Source: HighWire-hosted journal article supplement (doi:10.1101/gr.224626.117), 2017-10-31
Supplement: Supplemental_Table_S1.xlsx [file Supplemental_Table_S1.xlsx]

## Sheet: WT+N2+control
Run Accession	Experiment Accession	Experiment Title	Organism Name	Instrument	Submitter	Study Accession	Study Title	Sample Accession	Total Reads	Total Bases	Library Name	Library Strategy	Library Source	Library Selection
DRR003389	DRX002713	KH1668:smg-2(yb979)	Caenorhabditis elegans	Illumina Genome Analyzer IIx	TOKYO_MEDEN	DRP000898	mRNAseq for the unc-75 mutant	DRS002797		585.8	1	26415513	950958468	KH1668:smg-2(yb979)	RNA-Seq	TRANSCRIPTOMIC	cDNA
DRR003390	DRX002714	KH1857:smg-2(yb979) unc-75 (yb1701)	Caenorhabditis elegans	Illumina Genome Analyzer IIx	TOKYO_MEDEN	DRP000898	mRNAseq for the unc-75 mutant	DRS002798		595.38	1	25936230	933704280	KH1857:smg-2(yb979) unc-75 (yb1701)	RNA-Seq	TRANSCRIPTOMIC	cDNA
ERR305394	ERX278737	RNA-seq transcript assembly evaluation	Caenorhabditis elegans	Illumina Genome Analyzer IIx	European Molecular Biology Laboratory	ERP003471	RNA-seq transcript assembly evaluation	ERS317064		2453.23	1	24145595	3621839250	C_elegans_L3_10866_L1	RNA-Seq	TRANSCRIPTOMIC	Hybrid Selection
ERR305400	ERX278739	RNA-seq transcript assembly evaluation	Caenorhabditis elegans	Illumina Genome Analyzer IIx	European Molecular Biology Laboratory	ERP003471	RNA-seq transcript assembly evaluation	ERS317066		2346.59	1	23246239	3486935850	C_elegans_L3_10866_L2	RNA-Seq	TRANSCRIPTOMIC	Hybrid Selection
ERR305390	ERX278740	RNA-seq transcript assembly evaluation	Caenorhabditis elegans	Illumina Genome Analyzer IIx	European Molecular Biology Laboratory	ERP003471	RNA-seq transcript assembly evaluation	ERS317067		2624.1	1	25953543	3893031450	C_elegans_L3_10866_L3	RNA-Seq	TRANSCRIPTOMIC	Hybrid Selection
SRR030710	SRX013286	GSM455395: oocyte_TAP_seq_prb_s2	Caenorhabditis elegans	Illumina Genome Analyzer II	GEO	SRP001449	High throughput sequencing of mutants in the WAGO pathway	SRS007471		181.38	1	9598873	345559428	oocyte_TAP_seq_prb_s2	RNA-Seq	TRANSCRIPTOMIC	PCR
SRR030711	SRX013287	GSM455396: WAGO-1_IP_CIPPNK_seq_prb_s6	Caenorhabditis elegans	Illumina Genome Analyzer II	GEO	SRP001449	High throughput sequencing of mutants in the WAGO pathway	SRS007472		93.91	1	4993392	179762112	WAGO-1_IP_CIPPNK_seq_prb_s6	RNA-Seq	TRANSCRIPTOMIC	PCR
SRR030712	SRX013288	GSM455397: WAGO-1_input_CIPPNK_seq_prb_s7	Caenorhabditis elegans	Illumina Genome Analyzer II	GEO	SRP001449	High throughput sequencing of mutants in the WAGO pathway	SRS007473		95.91	1	5105273	183789828	WAGO-1_input_CIPPNK_seq_prb_s7	RNA-Seq	TRANSCRIPTOMIC	PCR
SRR030713	SRX013289	GSM455398: mago12_CIPPNK_seq_prb_s3	Caenorhabditis elegans	Illumina Genome Analyzer II	GEO	SRP001449	High throughput sequencing of mutants in the WAGO pathway	SRS007474		80.76	1	5731100	206319600	mago12_CIPPNK_seq_prb_s3	RNA-Seq	TRANSCRIPTOMIC	PCR
SRR030714	SRX013290	GSM455399: mut7_CIPPNK_seq_prb_s8	Caenorhabditis elegans	Illumina Genome Analyzer II	GEO	SRP001449	High throughput sequencing of mutants in the WAGO pathway	SRS007475		107.01	1	5594202	201391272	mut7_CIPPNK_seq_prb_s8	RNA-Seq	TRANSCRIPTOMIC	PCR
SRR030715	SRX013291	GSM455400: rde-3_CIPPNK_seq_prb_s7	Caenorhabditis elegans	Illumina Genome Analyzer II	GEO	SRP001449	High throughput sequencing of mutants in the WAGO pathway	SRS007476		115.16	1	5725958	206134488	rde-3_CIPPNK_seq_prb_s7	RNA-Seq	TRANSCRIPTOMIC	PCR
SRR030716	SRX013292	GSM455401: smg5_CIPPNK_seq_prb_s5	Caenorhabditis elegans	Illumina Genome Analyzer II	GEO	SRP001449	High throughput sequencing of mutants in the WAGO pathway	SRS007477		106.41	1	6817934	245445624	smg5_CIPPNK_seq_prb_s5	RNA-Seq	TRANSCRIPTOMIC	PCR
SRR030717	SRX013293	GSM455402: deb26_CIPPNK_seq_prb_s5	Caenorhabditis elegans	Illumina Genome Analyzer II	GEO	SRP001449	High throughput sequencing of mutants in the WAGO pathway	SRS007478		137.1	1	7756471	279232956	deb26_CIPPNK_seq_prb_s5	RNA-Seq	TRANSCRIPTOMIC	PCR
SRR030718	SRX013294	GSM455403: ekl-1_CIPPNK_seq_prb_s2	Caenorhabditis elegans	Illumina Genome Analyzer II	GEO	SRP001449	High throughput sequencing of mutants in the WAGO pathway	SRS007479		79.15	1	5545487	199637532	ekl-1_CIPPNK_seq_prb_s2	RNA-Seq	TRANSCRIPTOMIC	PCR
SRR030719	SRX013295	GSM455404: rde4_CIPPNK_seq_prb_s8	Caenorhabditis elegans	Illumina Genome Analyzer II	GEO	SRP001449	High throughput sequencing of mutants in the WAGO pathway	SRS007480		130.43	1	6177948	222406128	rde4_CIPPNK_seq_prb_s8	RNA-Seq	TRANSCRIPTOMIC	PCR
SRR065719	SRX026728	Caenorhabditis elegans L3-stage larval RNAseq	Caenorhabditis elegans	Illumina Genome Analyzer II	Cal. Inst. of Tech., Division of Biology	SRP003492	Caenorhabditis angaria genome sequencing project	SRS114806		6792.77	1	73345377	11148497304	10866	RNA-Seq	TRANSCRIPTOMIC	cDNA
SRR065717	SRX026729	Caenorhabditis elegans starved larval (L1 stage and later) RNAseq	Caenorhabditis elegans	Illumina Genome Analyzer II	Cal. Inst. of Tech., Division of Biology	SRP003492	Caenorhabditis angaria genome sequencing project	SRS114804		2892.57	1	29115135	4425500520	11291	RNA-Seq	TRANSCRIPTOMIC	cDNA
SRR068553 SRR068554	SRX028190	GSM577107: N2_mixed-stage_dsDNALigSeq	Caenorhabditis elegans	Illumina Genome Analyzer II	GEO	SRP003783	Multimodal RNA-seq using single-strand, double-strand, and circligase-based capture yields a refined and extended description of the C. elegans transcriptome	SRS117221	25075373	902713428	GSM577107: N2_mixed-stage_dsDNALigSeq	RNA-Seq	TRANSCRIPTOMIC	cDNA
SRR068555 SRR068556 SRR068557	SRX028191	GSM577108: N2_mixed-stage_ssRNALigSeq	Caenorhabditis elegans	Illumina Genome Analyzer II	GEO	SRP003783	Multimodal RNA-seq using single-strand, double-strand, and circligase-based capture yields a refined and extended description of the C. elegans transcriptome	SRS117222	12136841	436926276	GSM577108: N2_mixed-stage_ssRNALigSeq	RNA-Seq	TRANSCRIPTOMIC	cDNA
SRR068558 SRR068559 SRR068560	SRX028192	GSM577110: fem-3_dsDNALigSeq	Caenorhabditis elegans	Illumina Genome Analyzer II	GEO	SRP003783	Multimodal RNA-seq using single-strand, double-strand, and circligase-based capture yields a refined and extended description of the C. elegans transcriptome	SRS117223		253.75	3	12871018	463356648	GSM577110: fem-3_dsDNALigSeq	RNA-Seq	TRANSCRIPTOMIC	cDNA
SRR068561	SRX028193	GSM577111: fem-1_dsDNALigSeq	Caenorhabditis elegans	Illumina Genome Analyzer II	GEO	SRP003783	Multimodal RNA-seq using single-strand, double-strand, and circligase-based capture yields a refined and extended description of the C. elegans transcriptome	SRS117224		138.53	1	7580605	272901780	GSM577111: fem-1_dsDNALigSeq	RNA-Seq	TRANSCRIPTOMIC	cDNA
SRR068562 SRR068563	SRX028194	GSM577112: him-8_dsDNALigSeq	Caenorhabditis elegans	Illumina Genome Analyzer II	GEO	SRP003783	Multimodal RNA-seq using single-strand, double-strand, and circligase-based capture yields a refined and extended description of the C. elegans transcriptome	SRS117225		157.11	2	6521604	234777744	GSM577112: him-8_dsDNALigSeq	RNA-Seq	TRANSCRIPTOMIC	cDNA
SRR068564 SRR068565	SRX028195	GSM577113: him-8_ssRNALigSeq	Caenorhabditis elegans	Illumina Genome Analyzer II	GEO	SRP003783	Multimodal RNA-seq using single-strand, double-strand, and circligase-based capture yields a refined and extended description of the C. elegans transcriptome	SRS117226		297.92	2	12349219	444571884	GSM577113: him-8_ssRNALigSeq	RNA-Seq	TRANSCRIPTOMIC	cDNA
SRR068566 SRR068567	SRX028196	GSM577114: rrf-3_him-8_ssRNALigSeq	Caenorhabditis elegans	Illumina Genome Analyzer II	GEO	SRP003783	Multimodal RNA-seq using single-strand, double-strand, and circligase-based capture yields a refined and extended description of the C. elegans transcriptome	SRS117227		280.74	2	13016723	468602028	GSM577114: rrf-3_him-8_ssRNALigSeq	RNA-Seq	TRANSCRIPTOMIC	cDNA
SRR068568 SRR068569	SRX028197	GSM577115: N2_L1_ssRNALigSeq	Caenorhabditis elegans	Illumina Genome Analyzer II	GEO	SRP003783	Multimodal RNA-seq using single-strand, double-strand, and circligase-based capture yields a refined and extended description of the C. elegans transcriptome	SRS117228	16140096	581043456	GSM577115: N2_L1_ssRNALigSeq	RNA-Seq	TRANSCRIPTOMIC	cDNA
SRR068570 SRR068571	SRX028198	GSM577116: N2_L2_ssRNALigSeq	Caenorhabditis elegans	Illumina Genome Analyzer II	GEO	SRP003783	Multimodal RNA-seq using single-strand, double-strand, and circligase-based capture yields a refined and extended description of the C. elegans transcriptome	SRS117229	13919194	501090984	GSM577116: N2_L2_ssRNALigSeq	RNA-Seq	TRANSCRIPTOMIC	cDNA
SRR068572 SRR068573	SRX028199	GSM577117: N2_L3_ssRNALigSeq	Caenorhabditis elegans	Illumina Genome Analyzer II	GEO	SRP003783	Multimodal RNA-seq using single-strand, double-strand, and circligase-based capture yields a refined and extended description of the C. elegans transcriptome	SRS117230	11568569	416468484	GSM577117: N2_L3_ssRNALigSeq	RNA-Seq	TRANSCRIPTOMIC	cDNA
SRR068574 SRR068575	SRX028200	GSM577118: N2_L4_ssRNALigSeq	Caenorhabditis elegans	Illumina Genome Analyzer II	GEO	SRP003783	Multimodal RNA-seq using single-strand, double-strand, and circligase-based capture yields a refined and extended description of the C. elegans transcriptome	SRS117231	6422295	231202620	GSM577118: N2_L4_ssRNALigSeq	RNA-Seq	TRANSCRIPTOMIC	cDNA
SRR068576	SRX028201	GSM577119: N2_L1_CircLigSeq	Caenorhabditis elegans	Illumina Genome Analyzer II	GEO	SRP003783	Multimodal RNA-seq using single-strand, double-strand, and circligase-based capture yields a refined and extended description of the C. elegans transcriptome	SRS117232	14163319	509879484	GSM577119: N2_L1_CircLigSeq	RNA-Seq	TRANSCRIPTOMIC	cDNA
SRR068577	SRX028202	GSM577120: N2_L2_CircLigSeq	Caenorhabditis elegans	Illumina Genome Analyzer II	GEO	SRP003783	Multimodal RNA-seq using single-strand, double-strand, and circligase-based capture yields a refined and extended description of the C. elegans transcriptome	SRS117233	13924082	501266952	GSM577120: N2_L2_CircLigSeq	RNA-Seq	TRANSCRIPTOMIC	cDNA
SRR068578	SRX028203	GSM577121: N2_L3_CircLigSeq	Caenorhabditis elegans	Illumina Genome Analyzer II	GEO	SRP003783	Multimodal RNA-seq using single-strand, double-strand, and circligase-based capture yields a refined and extended description of the C. elegans transcriptome	SRS117234	14104707	507769452	GSM577121: N2_L3_CircLigSeq	RNA-Seq	TRANSCRIPTOMIC	cDNA
SRR068579 SRR068580 SRR068581 SRR068582 SRR068583	SRX028204	GSM577122: N2_mixed-stage_polysomes	Caenorhabditis elegans	Illumina Genome Analyzer II	GEO	SRP003783	Multimodal RNA-seq using single-strand, double-strand, and circligase-based capture yields a refined and extended description of the C. elegans transcriptome	SRS117235	9987765	359559540	GSM577122: N2_mixed-stage_polysomes	RNA-Seq	TRANSCRIPTOMIC	cDNA
SRR070085	SRX029174	GSM612873: egg_wild-type_run1	Caenorhabditis elegans	Illumina Genome Analyzer II	GEO	SRP003896	Formation, regulation and evolution of 3' UTRs in Caenorhabditis elegans	SRS118149	14262022	513432792	GSM612873: egg_wild-type_run1	RNA-Seq	TRANSCRIPTOMIC	cDNA
SRR070086	SRX029175	GSM612874: L1_wild-type_run1	Caenorhabditis elegans	Illumina Genome Analyzer II	GEO	SRP003896	Formation, regulation and evolution of 3' UTRs in Caenorhabditis elegans	SRS118150	11927226	429380136	GSM612874: L1_wild-type_run1	RNA-Seq	TRANSCRIPTOMIC	cDNA
SRR070087	SRX029176	GSM612875: L2_wild-type_run1	Caenorhabditis elegans	Illumina Genome Analyzer II	GEO	SRP003896	Formation, regulation and evolution of 3' UTRs in Caenorhabditis elegans	SRS118151	11937880	429763680	GSM612875: L2_wild-type_run1	RNA-Seq	TRANSCRIPTOMIC	cDNA
SRR070088	SRX029177	GSM612876: L3_wild-type_run1	Caenorhabditis elegans	Illumina Genome Analyzer II	GEO	SRP003896	Formation, regulation and evolution of 3' UTRs in Caenorhabditis elegans	SRS118152	15680932	564513552	GSM612876: L3_wild-type_run1	RNA-Seq	TRANSCRIPTOMIC	cDNA
SRR070089	SRX029178	GSM612877: L4_wild-type_run1	Caenorhabditis elegans	Illumina Genome Analyzer II	GEO	SRP003896	Formation, regulation and evolution of 3' UTRs in Caenorhabditis elegans	SRS118153	15100245	543608820	GSM612877: L4_wild-type_run1	RNA-Seq	TRANSCRIPTOMIC	cDNA
SRR070090	SRX029179	GSM612878: adult_wild-type_run1	Caenorhabditis elegans	Illumina Genome Analyzer II	GEO	SRP003896	Formation, regulation and evolution of 3' UTRs in Caenorhabditis elegans	SRS118154	19648734	707354424	GSM612878: adult_wild-type_run1	RNA-Seq	TRANSCRIPTOMIC	cDNA
SRR070091	SRX029180	GSM612879: adult_glp-4_run1	Caenorhabditis elegans	Illumina Genome Analyzer II	GEO	SRP003896	Formation, regulation and evolution of 3' UTRs in Caenorhabditis elegans	SRS118155		348.8	1	15067925	542445300	GSM612879: adult_glp-4_run1	RNA-Seq	TRANSCRIPTOMIC	cDNA
SRR070092	SRX029181	GSM612880: dauer_wild-type_run1	Caenorhabditis elegans	Illumina Genome Analyzer II	GEO	SRP003896	Formation, regulation and evolution of 3' UTRs in Caenorhabditis elegans	SRS118156	14713880	529699680	GSM612880: dauer_wild-type_run1	RNA-Seq	TRANSCRIPTOMIC	cDNA
SRR070093	SRX029182	GSM612881: mixed_stage_wild-type_run1	Caenorhabditis elegans	Illumina Genome Analyzer II	GEO	SRP003896	Formation, regulation and evolution of 3' UTRs in Caenorhabditis elegans	SRS118157	8452131	304276716	GSM612881: mixed_stage_wild-type_run1	RNA-Seq	TRANSCRIPTOMIC	cDNA
SRR070094	SRX029183	GSM612882: mixed_stage_wild-type_run2	Caenorhabditis elegans	Illumina Genome Analyzer II	GEO	SRP003896	Formation, regulation and evolution of 3' UTRs in Caenorhabditis elegans	SRS118158	10088532	363187152	GSM612882: mixed_stage_wild-type_run2	RNA-Seq	TRANSCRIPTOMIC	cDNA
SRR097477	SRX040314	GSM665342: JMM-cel-015_ego-1_fem-1_L3_mRNA-1	Caenorhabditis elegans	Illumina Genome Analyzer II	GEO	SRP005562	mRNA sequencing from ego-1(om84) and control L3, L4, and adult C. elegans hermaphrodites	SRS165564		10.39	1	562811	20261196	GSM665342: JMM-cel-015_ego-1_fem-1_L3_mRNA-1	RNA-Seq	TRANSCRIPTOMIC	cDNA
SRR097478	SRX040315	GSM665343: JMM-cel-016_ego-1_fem-1_L3_mRNA-2	Caenorhabditis elegans	Illumina Genome Analyzer II	GEO	SRP005562	mRNA sequencing from ego-1(om84) and control L3, L4, and adult C. elegans hermaphrodites	SRS165565		14.15	1	979028	35245008	GSM665343: JMM-cel-016_ego-1_fem-1_L3_mRNA-2	RNA-Seq	TRANSCRIPTOMIC	cDNA
SRR097479	SRX040316	GSM665344: JMM-cel-017_fem-1_L3_mRNA-1	Caenorhabditis elegans	Illumina Genome Analyzer II	GEO	SRP005562	mRNA sequencing from ego-1(om84) and control L3, L4, and adult C. elegans hermaphrodites	SRS165566		20.17	1	1213037	43669332	GSM665344: JMM-cel-017_fem-1_L3_mRNA-1	RNA-Seq	TRANSCRIPTOMIC	cDNA
SRR097480	SRX040317	GSM665345: JMM-cel-018_fem-1_L3_mRNA-2	Caenorhabditis elegans	Illumina Genome Analyzer II	GEO	SRP005562	mRNA sequencing from ego-1(om84) and control L3, L4, and adult C. elegans hermaphrodites	SRS165567		14.76	1	1120762	40347432	GSM665345: JMM-cel-018_fem-1_L3_mRNA-2	RNA-Seq	TRANSCRIPTOMIC	cDNA
SRR097481	SRX040318	GSM665346: JMM-cel-019_ego-1_fem-1_L4_mRNA-1	Caenorhabditis elegans	Illumina Genome Analyzer II	GEO	SRP005562	mRNA sequencing from ego-1(om84) and control L3, L4, and adult C. elegans hermaphrodites	SRS165568		37.65	1	1570756	56547216	GSM665346: JMM-cel-019_ego-1_fem-1_L4_mRNA-1	RNA-Seq	TRANSCRIPTOMIC	cDNA
SRR097482	SRX040319	GSM665347: JMM-cel-020_ego-1_fem-1_L4_mRNA-2	Caenorhabditis elegans	Illumina Genome Analyzer II	GEO	SRP005562	mRNA sequencing from ego-1(om84) and control L3, L4, and adult C. elegans hermaphrodites	SRS165569		15.46	1	701994	25271784	GSM665347: JMM-cel-020_ego-1_fem-1_L4_mRNA-2	RNA-Seq	TRANSCRIPTOMIC	cDNA
SRR097483	SRX040320	GSM665348: JMM-cel-021_fem-1_L4_mRNA-1	Caenorhabditis elegans	Illumina Genome Analyzer II	GEO	SRP005562	mRNA sequencing from ego-1(om84) and control L3, L4, and adult C. elegans hermaphrodites	SRS165570		35.13	1	1538928	55401408	GSM665348: JMM-cel-021_fem-1_L4_mRNA-1	RNA-Seq	TRANSCRIPTOMIC	cDNA
SRR097484	SRX040321	GSM665349: JMM-cel-022_fem-1_L4_mRNA-2	Caenorhabditis elegans	Illumina Genome Analyzer II	GEO	SRP005562	mRNA sequencing from ego-1(om84) and control L3, L4, and adult C. elegans hermaphrodites	SRS165571		12.32	1	542351	19524636	GSM665349: JMM-cel-022_fem-1_L4_mRNA-2	RNA-Seq	TRANSCRIPTOMIC	cDNA
SRR097485	SRX040322	GSM665350: JMM-cel-023_ego-1_fem-1_AD_mRNA-1	Caenorhabditis elegans	Illumina Genome Analyzer II	GEO	SRP005562	mRNA sequencing from ego-1(om84) and control L3, L4, and adult C. elegans hermaphrodites	SRS165572		22.04	1	730043	26281548	GSM665350: JMM-cel-023_ego-1_fem-1_AD_mRNA-1	RNA-Seq	TRANSCRIPTOMIC	cDNA
SRR097486	SRX040323	GSM665351: JMM-cel-024_ego-1_fem-1_AD_mRNA-2	Caenorhabditis elegans	Illumina Genome Analyzer II	GEO	SRP005562	mRNA sequencing from ego-1(om84) and control L3, L4, and adult C. elegans hermaphrodites	SRS165573		18.83	1	625021	22500756	GSM665351: JMM-cel-024_ego-1_fem-1_AD_mRNA-2	RNA-Seq	TRANSCRIPTOMIC	cDNA
SRR097487	SRX040324	GSM665352: JMM-cel-025_ego-1_fem-1_AD_mRNA-3	Caenorhabditis elegans	Illumina Genome Analyzer II	GEO	SRP005562	mRNA sequencing from ego-1(om84) and control L3, L4, and adult C. elegans hermaphrodites	SRS165574		25.28	1	1064699	38329164	GSM665352: JMM-cel-025_ego-1_fem-1_AD_mRNA-3	RNA-Seq	TRANSCRIPTOMIC	cDNA
SRR097488	SRX040325	GSM665353: JMM-cel-026_ego-1_fem-1_AD_mRNA-4	Caenorhabditis elegans	Illumina Genome Analyzer II	GEO	SRP005562	mRNA sequencing from ego-1(om84) and control L3, L4, and adult C. elegans hermaphrodites	SRS165575		21.73	1	1002386	36085896	GSM665353: JMM-cel-026_ego-1_fem-1_AD_mRNA-4	RNA-Seq	TRANSCRIPTOMIC	cDNA
SRR097489	SRX040326	GSM665354: JMM-cel-027_fem-1_AD_mRNA-1	Caenorhabditis elegans	Illumina Genome Analyzer II	GEO	SRP005562	mRNA sequencing from ego-1(om84) and control L3, L4, and adult C. elegans hermaphrodites	SRS165576		16.45	1	558611	20109996	GSM665354: JMM-cel-027_fem-1_AD_mRNA-1	RNA-Seq	TRANSCRIPTOMIC	cDNA
SRR097490	SRX040327	GSM665355: JMM-cel-028_fem-1_AD_mRNA-2	Caenorhabditis elegans	Illumina Genome Analyzer II	GEO	SRP005562	mRNA sequencing from ego-1(om84) and control L3, L4, and adult C. elegans hermaphrodites	SRS165577		20.47	1	691310	24887160	GSM665355: JMM-cel-028_fem-1_AD_mRNA-2	RNA-Seq	TRANSCRIPTOMIC	cDNA
SRR097491	SRX040328	GSM665356: JMM-cel-029_fem-1_AD_mRNA-3	Caenorhabditis elegans	Illumina Genome Analyzer II	GEO	SRP005562	mRNA sequencing from ego-1(om84) and control L3, L4, and adult C. elegans hermaphrodites	SRS165578		22.14	1	940909	33872724	GSM665356: JMM-cel-029_fem-1_AD_mRNA-3	RNA-Seq	TRANSCRIPTOMIC	cDNA
SRR097492	SRX040329	GSM665357: JMM-cel-030_fem-1_AD_mRNA-4	Caenorhabditis elegans	Illumina Genome Analyzer II	GEO	SRP005562	mRNA sequencing from ego-1(om84) and control L3, L4, and adult C. elegans hermaphrodites	SRS165579		24.59	1	1103753	39735108	GSM665357: JMM-cel-030_fem-1_AD_mRNA-4	RNA-Seq	TRANSCRIPTOMIC	cDNA
SRR316754	SRX085219	Illumina sequencing of C. elegans N2 hand-picked 4 cell embryos DSN-Negative RW0001	Caenorhabditis elegans	Illumina Genome Analyzer II	UWGS-RW	SRP000401	Deep sequencing of the Caenorhabditis elegans transcriptome using RNA isolated from various developmental stages under various experimental conditions RW0001	SRS242383	36143752	1301175072	DSN-Negative	RNA-Seq	TRANSCRIPTOMIC	cDNA
SRR316755 SRR316756	SRX085220	Illumina sequencing of C. elegans N2 hand-picked 4 cell embryos DSN-Positive RW0001	Caenorhabditis elegans	Illumina Genome Analyzer II	UWGS-RW	SRP000401	Deep sequencing of the Caenorhabditis elegans transcriptome using RNA isolated from various developmental stages under various experimental conditions RW0001	SRS242384	112903239	4064516604	DSN-Positive	RNA-Seq	TRANSCRIPTOMIC	cDNA
SRR345264	SRX097313	GSM797450: 3'end-seq for input sample	Caenorhabditis elegans	Illumina Genome Analyzer IIx	GEO	SRP008241	Analysis of Caenorhabditis elegans intestinal gene expression and alternative polyadenylation using fluorescence-activated nuclei sorting (FANS) and 3' end deep sequencing (3'end-seq)	SRS261350		602.49	1	12821758	897523060	GSM797450: 3'end-seq for input sample	RNA-Seq	TRANSCRIPTOMIC	cDNA
SRR345265	SRX097314	GSM797451: 3'end-seq for sorted sample	Caenorhabditis elegans	Illumina Genome Analyzer IIx	GEO	SRP008241	Analysis of Caenorhabditis elegans intestinal gene expression and alternative polyadenylation using fluorescence-activated nuclei sorting (FANS) and 3' end deep sequencing (3'end-seq)	SRS261351		281.1	1	5995119	419658330	GSM797451: 3'end-seq for sorted sample	RNA-Seq	TRANSCRIPTOMIC	cDNA
SRR1999355	SRX1011385	GSM1667219: RNA-seq lsm1(tm3585); Caenorhabditis elegans; RNA-Seq	Caenorhabditis elegans	Illumina Genome Analyzer IIx	GEO	SRP057713	RNA sequencing of C. elegans lsm-1(tm3585) mutants at L3 stage	SRS923307		1013.53	1	13707906	1384498506		RNA-Seq	TRANSCRIPTOMIC	cDNA
SRR1999356	SRX1011386	GSM1667220: RNA-seq N2; Caenorhabditis elegans; RNA-Seq	Caenorhabditis elegans	Illumina Genome Analyzer IIx	GEO	SRP057713	RNA sequencing of C. elegans lsm-1(tm3585) mutants at L3 stage	SRS923306	10758582	1086616782		RNA-Seq	TRANSCRIPTOMIC	cDNA
SRR2012769 SRR2012770 SRR2012771	SRX1020630	Illumina sequence of C. elegans N2 synchronized embryos at 120 minutes with Ribo-zero treated total RNA 20120223_EMB-120 RNAseq random fragment library 100bp PE RW0001	Caenorhabditis elegans	Illumina HiSeq 2000	UWGS-RW	SRP000401	Deep sequencing of the Caenorhabditis elegans transcriptome using RNA isolated from various developmental stages under various experimental conditions RW0001	SRS931094	19549213	3909842600	20120223_EMB-120	RNA-Seq	TRANSCRIPTOMIC	cDNA
SRR2012768	SRX1020631	Illumina sequence of C. elegans N2 synchronized embryos at 120 minutes with Ribo-zero treated total RNA 20120223_EMB-120 RNAseq random fragment library 50bp SE RW0001	Caenorhabditis elegans	Illumina MiSeq	UWGS-RW	SRP000401	Deep sequencing of the Caenorhabditis elegans transcriptome using RNA isolated from various developmental stages under various experimental conditions RW0001	SRS931094	219953	10997650	20120223_EMB-120	RNA-Seq	TRANSCRIPTOMIC	cDNA
SRR2012775 SRR2012776 SRR2012777	SRX1020632	Illumina sequence of C. elegans N2 synchronized embryos at 150 minutes with Ribo-zero treated total RNA 20120223_EMB-150 RNAseq random fragment library 100bp PE RW0001	Caenorhabditis elegans	Illumina HiSeq 2000	UWGS-RW	SRP000401	Deep sequencing of the Caenorhabditis elegans transcriptome using RNA isolated from various developmental stages under various experimental conditions RW0001	SRS931095	47677763	9535552600	20120223_EMB-150	RNA-Seq	TRANSCRIPTOMIC	cDNA
SRR2012774	SRX1020633	Illumina sequence of C. elegans N2 synchronized embryos at 150 minutes with Ribo-zero treated total RNA 20120223_EMB-150 RNAseq random fragment library 50bp SE RW0001	Caenorhabditis elegans	Illumina MiSeq	UWGS-RW	SRP000401	Deep sequencing of the Caenorhabditis elegans transcriptome using RNA isolated from various developmental stages under various experimental conditions RW0001	SRS931095	279404	13970200	20120223_EMB-150	RNA-Seq	TRANSCRIPTOMIC	cDNA
SRR2012779 SRR2012780 SRR2012781	SRX1020634	Illumina sequence of C. elegans N2 synchronized embryos at 30 minutes with Ribo-zero treated total RNA 20120223_EMB-30 RNAseq random fragment library 100bp PE RW0001	Caenorhabditis elegans	Illumina HiSeq 2000	UWGS-RW	SRP000401	Deep sequencing of the Caenorhabditis elegans transcriptome using RNA isolated from various developmental stages under various experimental conditions RW0001	SRS931096	22922040	4584408000	20120223_EMB-30	RNA-Seq	TRANSCRIPTOMIC	cDNA
SRR2012778	SRX1020635	Illumina sequence of C. elegans N2 synchronized embryos at 30 minutes with Ribo-zero treated total RNA 20120223_EMB-30 RNAseq random fragment library 50bp SE RW0001	Caenorhabditis elegans	Illumina MiSeq	UWGS-RW	SRP000401	Deep sequencing of the Caenorhabditis elegans transcriptome using RNA isolated from various developmental stages under various experimental conditions RW0001	SRS931096	176043	8802150	20120223_EMB-30	RNA-Seq	TRANSCRIPTOMIC	cDNA
SRR2012783 SRR2012784 SRR2012785	SRX1020636	Illumina sequence of C. elegans N2 synchronized embryos at 0 minutes with Ribo-zero treated total RNA 20120223_EMB-0 RNAseq random fragment library 100bp PE RW0001	Caenorhabditis elegans	Illumina HiSeq 2000	UWGS-RW	SRP000401	Deep sequencing of the Caenorhabditis elegans transcriptome using RNA isolated from various developmental stages under various experimental conditions RW0001	SRS931097	20976967	4195393400	20120223_EMB-0	RNA-Seq	TRANSCRIPTOMIC	cDNA
SRR2012782	SRX1020637	Illumina sequence of C. elegans N2 synchronized embryos at 0 minutes with Ribo-zero treated total RNA 20120223_EMB-0 RNAseq random fragment library 50bp SE RW0001	Caenorhabditis elegans	Illumina MiSeq	UWGS-RW	SRP000401	Deep sequencing of the Caenorhabditis elegans transcriptome using RNA isolated from various developmental stages under various experimental conditions RW0001	SRS931097	169546	8477300	20120223_EMB-0	RNA-Seq	TRANSCRIPTOMIC	cDNA
SRR2012787 SRR2012788 SRR2012789	SRX1020638	Illumina sequence of C. elegans N2 synchronized embryos at 60 minutes with Ribo-zero treated total RNA 20120223_EMB-60 RNAseq random fragment library 100bp PE RW0001	Caenorhabditis elegans	Illumina HiSeq 2000	UWGS-RW	SRP000401	Deep sequencing of the Caenorhabditis elegans transcriptome using RNA isolated from various developmental stages under various experimental conditions RW0001	SRS931098	21623392	4324678400	20120223_EMB-60	RNA-Seq	TRANSCRIPTOMIC	cDNA
SRR2012786	SRX1020639	Illumina sequence of C. elegans N2 synchronized embryos at 60 minutes with Ribo-zero treated total RNA 20120223_EMB-60 RNAseq random fragment library 50bp SE RW0001	Caenorhabditis elegans	Illumina MiSeq	UWGS-RW	SRP000401	Deep sequencing of the Caenorhabditis elegans transcriptome using RNA isolated from various developmental stages under various experimental conditions RW0001	SRS931098	197042	9852100	20120223_EMB-60	RNA-Seq	TRANSCRIPTOMIC	cDNA
SRR2012791 SRR2012792 SRR2012793	SRX1020640	Illumina sequence of C. elegans N2 synchronized embryos at 90 minutes with Ribo-zero treated total RNA 20120223_EMB-90 RNAseq random fragment library 100bp PE RW0001	Caenorhabditis elegans	Illumina HiSeq 2000	UWGS-RW	SRP000401	Deep sequencing of the Caenorhabditis elegans transcriptome using RNA isolated from various developmental stages under various experimental conditions RW0001	SRS931099	25039161	5007832200	20120223_EMB-90	RNA-Seq	TRANSCRIPTOMIC	cDNA
SRR2012790	SRX1020641	Illumina sequence of C. elegans N2 synchronized embryos at 90 minutes with Ribo-zero treated total RNA 20120223_EMB-90 RNAseq random fragment library 50bp SE RW0001	Caenorhabditis elegans	Illumina MiSeq	UWGS-RW	SRP000401	Deep sequencing of the Caenorhabditis elegans transcriptome using RNA isolated from various developmental stages under various experimental conditions RW0001	SRS931099	189581	9479050	20120223_EMB-90	RNA-Seq	TRANSCRIPTOMIC	cDNA
SRR2015247 SRR2015248 SRR2015249	SRX1022566	Illumina sequence of C. elegans N2 synchronized embryos at 240 minutes with Ribo-zero treated total RNA 20120223_EMB-240 RNAseq random fragment library 100bp PE RW0001	Caenorhabditis elegans	Illumina HiSeq 2000	UWGS-RW	SRP000401	Deep sequencing of the Caenorhabditis elegans transcriptome using RNA isolated from various developmental stages under various experimental conditions RW0001	SRS932415	14855030	2971006000	20120223_EMB-240	RNA-Seq	TRANSCRIPTOMIC	cDNA
SRR2015246	SRX1022567	Illumina sequence of C. elegans N2 synchronized embryos at 240 minutes with Ribo-zero treated total RNA 20120223_EMB-240 RNAseq random fragment library 50bp SE RW0001	Caenorhabditis elegans	Illumina MiSeq	UWGS-RW	SRP000401	Deep sequencing of the Caenorhabditis elegans transcriptome using RNA isolated from various developmental stages under various experimental conditions RW0001	SRS932415	283509	14175450	20120223_EMB-240	RNA-Seq	TRANSCRIPTOMIC	cDNA
SRR2015251 SRR2015252 SRR2015253	SRX1022568	Illumina sequence of C. elegans N2 synchronized embryos at 270 minutes with Ribo-zero treated total RNA 20120223_EMB-270 RNAseq random fragment library 100bp PE RW0001	Caenorhabditis elegans	Illumina HiSeq 2000	UWGS-RW	SRP000401	Deep sequencing of the Caenorhabditis elegans transcriptome using RNA isolated from various developmental stages under various experimental conditions RW0001	SRS932416	15197400	3039480000	20120223_EMB-270	RNA-Seq	TRANSCRIPTOMIC	cDNA
SRR2015250	SRX1022569	Illumina sequence of C. elegans N2 synchronized embryos at 270 minutes with Ribo-zero treated total RNA 20120223_EMB-270 RNAseq random fragment library 50bp SE RW0001	Caenorhabditis elegans	Illumina MiSeq	UWGS-RW	SRP000401	Deep sequencing of the Caenorhabditis elegans transcriptome using RNA isolated from various developmental stages under various experimental conditions RW0001	SRS932416	221263	11063150	20120223_EMB-270	RNA-Seq	TRANSCRIPTOMIC	cDNA
SRR2015255 SRR2015256 SRR2015257	SRX1022570	Illumina sequence of C. elegans N2 synchronized embryos at 210 minutes with Ribo-zero treated total RNA 20120223_EMB-210 RNAseq random fragment library 100bp PE RW0001	Caenorhabditis elegans	Illumina HiSeq 2000	UWGS-RW	SRP000401	Deep sequencing of the Caenorhabditis elegans transcriptome using RNA isolated from various developmental stages under various experimental conditions RW0001	SRS932417	19848284	3969656800	20120223_EMB-210	RNA-Seq	TRANSCRIPTOMIC	cDNA
SRR2015254	SRX1022571	Illumina sequence of C. elegans N2 synchronized embryos at 210 minutes with Ribo-zero treated total RNA 20120223_EMB-210 RNAseq random fragment library 50bp SE RW0001	Caenorhabditis elegans	Illumina MiSeq	UWGS-RW	SRP000401	Deep sequencing of the Caenorhabditis elegans transcriptome using RNA isolated from various developmental stages under various experimental conditions RW0001	SRS932417	244311	12215550	20120223_EMB-210	RNA-Seq	TRANSCRIPTOMIC	cDNA
SRR2015260 SRR2015261 SRR2015262	SRX1022572	Illumina sequence of C. elegans N2 synchronized embryos at 330 minutes with Ribo-zero treated total RNA 20120223_EMB-330 RNAseq random fragment library 100bp PE RW0001	Caenorhabditis elegans	Illumina HiSeq 2000	UWGS-RW	SRP000401	Deep sequencing of the Caenorhabditis elegans transcriptome using RNA isolated from various developmental stages under various experimental conditions RW0001	SRS932418	24779988	4955997600	20120223_EMB-330	RNA-Seq	TRANSCRIPTOMIC	cDNA
SRR2015259	SRX1022573	Illumina sequence of C. elegans N2 synchronized embryos at 330 minutes with Ribo-zero treated total RNA 20120223_EMB-330 RNAseq random fragment library 50bp SE RW0001	Caenorhabditis elegans	Illumina MiSeq	UWGS-RW	SRP000401	Deep sequencing of the Caenorhabditis elegans transcriptome using RNA isolated from various developmental stages under various experimental conditions RW0001	SRS932418	159696	7984800	20120223_EMB-330	RNA-Seq	TRANSCRIPTOMIC	cDNA
SRR2015264 SRR2015265 SRR2015266	SRX1022574	Illumina sequence of C. elegans N2 synchronized embryos at 360 minutes with Ribo-zero treated total RNA 20120223_EMB-360 RNAseq random fragment library 100bp PE RW0001	Caenorhabditis elegans	Illumina HiSeq 2000	UWGS-RW	SRP000401	Deep sequencing of the Caenorhabditis elegans transcriptome using RNA isolated from various developmental stages under various experimental conditions RW0001	SRS932419	18769320	3753864000	20120223_EMB-360	RNA-Seq	TRANSCRIPTOMIC	cDNA
SRR2015263	SRX1022575	Illumina sequence of C. elegans N2 synchronized embryos at 360 minutes with Ribo-zero treated total RNA 20120223_EMB-360 RNAseq random fragment library 50bp SE RW0001	Caenorhabditis elegans	Illumina MiSeq	UWGS-RW	SRP000401	Deep sequencing of the Caenorhabditis elegans transcriptome using RNA isolated from various developmental stages under various experimental conditions RW0001	SRS932419	243594	12179700	20120223_EMB-360	RNA-Seq	TRANSCRIPTOMIC	cDNA
SRR2015268 SRR2015269 SRR2015270	SRX1022576	Illumina sequence of C. elegans N2 synchronized embryos at 390 minutes with Ribo-zero treated total RNA 20120223_EMB-390 RNAseq random fragment library 100bp PE RW0001	Caenorhabditis elegans	Illumina HiSeq 2000	UWGS-RW	SRP000401	Deep sequencing of the Caenorhabditis elegans transcriptome using RNA isolated from various developmental stages under various experimental conditions RW0001	SRS932420	33861468	6772293600	20120223_EMB-390	RNA-Seq	TRANSCRIPTOMIC	cDNA
SRR2015267	SRX1022577	Illumina sequence of C. elegans N2 synchronized embryos at 390 minutes with Ribo-zero treated total RNA 20120223_EMB-390 RNAseq random fragment library 50bp SE RW0001	Caenorhabditis elegans	Illumina MiSeq	UWGS-RW	SRP000401	Deep sequencing of the Caenorhabditis elegans transcriptome using RNA isolated from various developmental stages under various experimental conditions RW0001	SRS932420	268966	13448300	20120223_EMB-390	RNA-Seq	TRANSCRIPTOMIC	cDNA
SRR2015272 SRR2015273 SRR2015274	SRX1022578	Illumina sequence of C. elegans N2 synchronized embryos at 420 minutes with Ribo-zero treated total RNA 20120223_EMB-420 RNAseq random fragment library 100bp PE RW0001	Caenorhabditis elegans	Illumina HiSeq 2000	UWGS-RW	SRP000401	Deep sequencing of the Caenorhabditis elegans transcriptome using RNA isolated from various developmental stages under various experimental conditions RW0001	SRS932421	49527180	9905436000	20120223_EMB-420	RNA-Seq	TRANSCRIPTOMIC	cDNA
SRR2015271	SRX1022579	Illumina sequence of C. elegans N2 synchronized embryos at 420 minutes with Ribo-zero treated total RNA 20120223_EMB-420 RNAseq random fragment library 50bp SE RW0001	Caenorhabditis elegans	Illumina MiSeq	UWGS-RW	SRP000401	Deep sequencing of the Caenorhabditis elegans transcriptome using RNA isolated from various developmental stages under various experimental conditions RW0001	SRS932421	236550	11827500	20120223_EMB-420	RNA-Seq	TRANSCRIPTOMIC	cDNA
SRR2015276 SRR2015277 SRR2015278	SRX1022580	Illumina sequence of C. elegans N2 synchronized embryos at 300 minutes with Ribo-zero treated total RNA 20120223_EMB-300 RNAseq random fragment library 100bp PE RW0001	Caenorhabditis elegans	Illumina HiSeq 2000	UWGS-RW	SRP000401	Deep sequencing of the Caenorhabditis elegans transcriptome using RNA isolated from various developmental stages under various experimental conditions RW0001	SRS932422	16508109	3301621800	20120223_EMB-300	RNA-Seq	TRANSCRIPTOMIC	cDNA
SRR2015275	SRX1022581	Illumina sequence of C. elegans N2 synchronized embryos at 300 minutes with Ribo-zero treated total RNA 20120223_EMB-300 RNAseq random fragment library 50bp SE RW0001	Caenorhabditis elegans	Illumina MiSeq	UWGS-RW	SRP000401	Deep sequencing of the Caenorhabditis elegans transcriptome using RNA isolated from various developmental stages under various experimental conditions RW0001	SRS932422	206280	10314000	20120223_EMB-300	RNA-Seq	TRANSCRIPTOMIC	cDNA
SRR2015280 SRR2015281 SRR2015282	SRX1022582	Illumina sequence of C. elegans N2 synchronized embryos at 450 minutes with Ribo-zero treated total RNA 20120223_EMB-450 RNAseq random fragment library 100bp PE RW0001	Caenorhabditis elegans	Illumina HiSeq 2000	UWGS-RW	SRP000401	Deep sequencing of the Caenorhabditis elegans transcriptome using RNA isolated from various developmental stages under various experimental conditions RW0001	SRS932423	27916768	5583353600	20120223_EMB-450	RNA-Seq	TRANSCRIPTOMIC	cDNA
SRR2015279	SRX1022583	Illumina sequence of C. elegans N2 synchronized embryos at 450 minutes with Ribo-zero treated total RNA 20120223_EMB-450 RNAseq random fragment library 50bp SE RW0001	Caenorhabditis elegans	Illumina MiSeq	UWGS-RW	SRP000401	Deep sequencing of the Caenorhabditis elegans transcriptome using RNA isolated from various developmental stages under various experimental conditions RW0001	SRS932423	195715	9785750	20120223_EMB-450	RNA-Seq	TRANSCRIPTOMIC	cDNA
SRR2015284 SRR2015285 SRR2015286	SRX1022584	Illumina sequence of C. elegans N2 synchronized embryos at 180 minutes with Ribo-zero treated total RNA 20120223_EMB-180 RNAseq random fragment library 100bp PE RW0001	Caenorhabditis elegans	Illumina HiSeq 2000	UWGS-RW	SRP000401	Deep sequencing of the Caenorhabditis elegans transcriptome using RNA isolated from various developmental stages under various experimental conditions RW0001	SRS932424	19068616	3813723200	20120223_EMB-180	RNA-Seq	TRANSCRIPTOMIC	cDNA
SRR2015283	SRX1022585	Illumina sequence of C. elegans N2 synchronized embryos at 180 minutes with Ribo-zero treated total RNA 20120223_EMB-180 RNAseq random fragment library 50bp SE RW0001	Caenorhabditis elegans	Illumina MiSeq	UWGS-RW	SRP000401	Deep sequencing of the Caenorhabditis elegans transcriptome using RNA isolated from various developmental stages under various experimental conditions RW0001	SRS932424	314512	15725600	20120223_EMB-180	RNA-Seq	TRANSCRIPTOMIC	cDNA
SRR2015288 SRR2015289 SRR2015290	SRX1022586	Illumina sequence of C. elegans N2 synchronized embryos at 480 minutes with Ribo-zero treated total RNA 20120223_EMB-480 RNAseq random fragment library 100bp PE RW0001	Caenorhabditis elegans	Illumina HiSeq 2000	UWGS-RW	SRP000401	Deep sequencing of the Caenorhabditis elegans transcriptome using RNA isolated from various developmental stages under various experimental conditions RW0001	SRS932425	38272017	7654403400	20120223_EMB-480	RNA-Seq	TRANSCRIPTOMIC	cDNA
SRR2015287	SRX1022587	Illumina sequence of C. elegans N2 synchronized embryos at 480 minutes with Ribo-zero treated total RNA 20120223_EMB-480 RNAseq random fragment library 50bp SE RW0001	Caenorhabditis elegans	Illumina MiSeq	UWGS-RW	SRP000401	Deep sequencing of the Caenorhabditis elegans transcriptome using RNA isolated from various developmental stages under various experimental conditions RW0001	SRS932425	232041	11602050	20120223_EMB-480	RNA-Seq	TRANSCRIPTOMIC	cDNA
SRR2015292 SRR2015293 SRR2015294	SRX1022588	Illumina sequence of C. elegans N2 synchronized embryos at 510 minutes with Ribo-zero treated total RNA 20120223_EMB-510 RNAseq random fragment library 100bp PE RW0001	Caenorhabditis elegans	Illumina HiSeq 2000	UWGS-RW	SRP000401	Deep sequencing of the Caenorhabditis elegans transcriptome using RNA isolated from various developmental stages under various experimental conditions RW0001	SRS932426	31929900	6385980000	20120223_EMB-510	RNA-Seq	TRANSCRIPTOMIC	cDNA
SRR2015291	SRX1022589	Illumina sequence of C. elegans N2 synchronized embryos at 510 minutes with Ribo-zero treated total RNA 20120223_EMB-510 RNAseq random fragment library 50bp SE RW0001	Caenorhabditis elegans	Illumina MiSeq	UWGS-RW	SRP000401	Deep sequencing of the Caenorhabditis elegans transcriptome using RNA isolated from various developmental stages under various experimental conditions RW0001	SRS932426	281897	14094850	20120223_EMB-510	RNA-Seq	TRANSCRIPTOMIC	cDNA
SRR2015298 SRR2015299 SRR2015300	SRX1022592	Illumina sequence of C. elegans N2 synchronized embryos at 540 minutes with Ribo-zero treated total RNA 20120223_EMB-540 RNAseq random fragment library 100bp PE RW0001	Caenorhabditis elegans	Illumina HiSeq 2000	UWGS-RW	SRP000401	Deep sequencing of the Caenorhabditis elegans transcriptome using RNA isolated from various developmental stages under various experimental conditions RW0001	SRS932429	28232832	5646566400	20120223_EMB-540	RNA-Seq	TRANSCRIPTOMIC	cDNA
SRR2015297	SRX1022593	Illumina sequence of C. elegans N2 synchronized embryos at 540 minutes with Ribo-zero treated total RNA 20120223_EMB-540 RNAseq random fragment library 50bp SE RW0001	Caenorhabditis elegans	Illumina MiSeq	UWGS-RW	SRP000401	Deep sequencing of the Caenorhabditis elegans transcriptome using RNA isolated from various developmental stages under various experimental conditions RW0001	SRS932429	195737	9786850	20120223_EMB-540	RNA-Seq	TRANSCRIPTOMIC	cDNA
SRR2015303 SRR2015304 SRR2015305	SRX1022595	Illumina sequence of C. elegans N2 synchronized embryos at 600 minutes with Ribo-zero treated total RNA 20120223_EMB-600 RNAseq random fragment library 100bp PE RW0001	Caenorhabditis elegans	Illumina HiSeq 2000	UWGS-RW	SRP000401	Deep sequencing of the Caenorhabditis elegans transcriptome using RNA isolated from various developmental stages under various experimental conditions RW0001	SRS932431	17400249	3480049800	20120223_EMB-600	RNA-Seq	TRANSCRIPTOMIC	cDNA
SRR2015302	SRX1022596	Illumina sequence of C. elegans N2 synchronized embryos at 600 minutes with Ribo-zero treated total RNA 20120223_EMB-600 RNAseq random fragment library 50bp SE RW0001	Caenorhabditis elegans	Illumina MiSeq	UWGS-RW	SRP000401	Deep sequencing of the Caenorhabditis elegans transcriptome using RNA isolated from various developmental stages under various experimental conditions RW0001	SRS932431	209121	10456050	20120223_EMB-600	RNA-Seq	TRANSCRIPTOMIC	cDNA
SRR2015307 SRR2015308 SRR2015309	SRX1022597	Illumina sequence of C. elegans N2 synchronized embryos at 570 minutes with Ribo-zero treated total RNA 20120223_EMB-570 RNAseq random fragment library 100bp PE RW0001	Caenorhabditis elegans	Illumina HiSeq 2000	UWGS-RW	SRP000401	Deep sequencing of the Caenorhabditis elegans transcriptome using RNA isolated from various developmental stages under various experimental conditions RW0001	SRS932432	26793796	5358759200	20120223_EMB-570	RNA-Seq	TRANSCRIPTOMIC	cDNA
SRR2015306	SRX1022598	Illumina sequence of C. elegans N2 synchronized embryos at 570 minutes with Ribo-zero treated total RNA 20120223_EMB-570 RNAseq random fragment library 50bp SE RW0001	Caenorhabditis elegans	Illumina MiSeq	UWGS-RW	SRP000401	Deep sequencing of the Caenorhabditis elegans transcriptome using RNA isolated from various developmental stages under various experimental conditions RW0001	SRS932432	193692	9684600	20120223_EMB-570	RNA-Seq	TRANSCRIPTOMIC	cDNA
SRR2015310 SRR2015311	SRX1022599	Illumina sequence of C. elegans N2 synchronized embryos at 60 minutes with Ribo-zero treated total RNA 20120411_EMB-60 RNAseq random fragment library 100bp PE RW0001	Caenorhabditis elegans	Illumina HiSeq 2000	UWGS-RW	SRP000401	Deep sequencing of the Caenorhabditis elegans transcriptome using RNA isolated from various developmental stages under various experimental conditions RW0001	SRS932433	12254432	2450886400	20120411_EMB-60	RNA-Seq	TRANSCRIPTOMIC	cDNA
SRR2015312 SRR2015313	SRX1022600	Illumina sequence of C. elegans N2 synchronized embryos at 0 minutes with Ribo-zero treated total RNA 20120411_EMB-0 RNAseq random fragment library 100bp PE RW0001	Caenorhabditis elegans	Illumina HiSeq 2000	UWGS-RW	SRP000401	Deep sequencing of the Caenorhabditis elegans transcriptome using RNA isolated from various developmental stages under various experimental conditions RW0001	SRS932434	11718993	2343798600	20120411_EMB-0	RNA-Seq	TRANSCRIPTOMIC	cDNA
SRR2015314 SRR2015315	SRX1022601	Illumina sequence of C. elegans N2 synchronized embryos at 150 minutes with Ribo-zero treated total RNA 20120411_EMB-150 RNAseq random fragment library 100bp PE RW0001	Caenorhabditis elegans	Illumina HiSeq 2000	UWGS-RW	SRP000401	Deep sequencing of the Caenorhabditis elegans transcriptome using RNA isolated from various developmental stages under various experimental conditions RW0001	SRS932435	9549481	1909896200	20120411_EMB-150	RNA-Seq	TRANSCRIPTOMIC	cDNA
SRR2015316 SRR2015317	SRX1022602	Illumina sequence of C. elegans N2 synchronized embryos at 120 minutes with Ribo-zero treated total RNA 20120411_EMB-120 RNAseq random fragment library 100bp PE RW0001	Caenorhabditis elegans	Illumina HiSeq 2000	UWGS-RW	SRP000401	Deep sequencing of the Caenorhabditis elegans transcriptome using RNA isolated from various developmental stages under various experimental conditions RW0001	SRS932436	15519562	3103912400	20120411_EMB-120	RNA-Seq	TRANSCRIPTOMIC	cDNA
SRR2015318 SRR2015319	SRX1022603	Illumina sequence of C. elegans N2 synchronized embryos at 180 minutes with Ribo-zero treated total RNA 20120411_EMB-180 RNAseq random fragment library 100bp PE RW0001	Caenorhabditis elegans	Illumina HiSeq 2000	UWGS-RW	SRP000401	Deep sequencing of the Caenorhabditis elegans transcriptome using RNA isolated from various developmental stages under various experimental conditions RW0001	SRS932437	10902536	2180507200	20120411_EMB-180	RNA-Seq	TRANSCRIPTOMIC	cDNA
SRR2015320 SRR2015321	SRX1022604	Illumina sequence of C. elegans N2 synchronized embryos at 240 minutes with Ribo-zero treated total RNA 20120411_EMB-240 RNAseq random fragment library 100bp PE RW0001	Caenorhabditis elegans	Illumina HiSeq 2000	UWGS-RW	SRP000401	Deep sequencing of the Caenorhabditis elegans transcriptome using RNA isolated from various developmental stages under various experimental conditions RW0001	SRS932438	12454810	2490962000	20120411_EMB-240	RNA-Seq	TRANSCRIPTOMIC	cDNA
SRR2015322 SRR2015323	SRX1022605	Illumina sequence of C. elegans N2 synchronized embryos at 90 minutes with Ribo-zero treated total RNA 20120411_EMB-90 RNAseq random fragment library 100bp PE RW0001	Caenorhabditis elegans	Illumina HiSeq 2000	UWGS-RW	SRP000401	Deep sequencing of the Caenorhabditis elegans transcriptome using RNA isolated from various developmental stages under various experimental conditions RW0001	SRS932439	10031752	2006350400	20120411_EMB-90	RNA-Seq	TRANSCRIPTOMIC	cDNA
SRR2015324 SRR2015325	SRX1022607	Illumina sequence of C. elegans N2 synchronized embryos at 360 minutes with Ribo-zero treated total RNA 20120411_EMB-360 RNAseq random fragment library 100bp PE RW0001	Caenorhabditis elegans	Illumina HiSeq 2000	UWGS-RW	SRP000401	Deep sequencing of the Caenorhabditis elegans transcriptome using RNA isolated from various developmental stages under various experimental conditions RW0001	SRS932441	12642119	2528423800	20120411_EMB-360	RNA-Seq	TRANSCRIPTOMIC	cDNA
SRR2015326 SRR2015327	SRX1022608	Illumina sequence of C. elegans N2 synchronized embryos at 300 minutes with Ribo-zero treated total RNA 20120411_EMB-300 RNAseq random fragment library 100bp PE RW0001	Caenorhabditis elegans	Illumina HiSeq 2000	UWGS-RW	SRP000401	Deep sequencing of the Caenorhabditis elegans transcriptome using RNA isolated from various developmental stages under various experimental conditions RW0001	SRS932442	16571940	3314388000	20120411_EMB-300	RNA-Seq	TRANSCRIPTOMIC	cDNA
SRR2015328 SRR2015329	SRX1022609	Illumina sequence of C. elegans N2 synchronized embryos at 600 minutes with Ribo-zero treated total RNA 20120411_EMB-600 RNAseq random fragment library 100bp PE RW0001	Caenorhabditis elegans	Illumina HiSeq 2000	UWGS-RW	SRP000401	Deep sequencing of the Caenorhabditis elegans transcriptome using RNA isolated from various developmental stages under various experimental conditions RW0001	SRS932443	14859930	2971986000	20120411_EMB-600	RNA-Seq	TRANSCRIPTOMIC	cDNA
SRR2015330 SRR2015331	SRX1022610	Illumina sequence of C. elegans N2 synchronized embryos at 30 minutes with Ribo-zero treated total RNA 20120419_EMB-30 RNAseq random fragment library 100bp PE RW0001	Caenorhabditis elegans	Illumina HiSeq 2000	UWGS-RW	SRP000401	Deep sequencing of the Caenorhabditis elegans transcriptome using RNA isolated from various developmental stages under various experimental conditions RW0001	SRS932444	9566372	1913274400	20120419_EMB-30	RNA-Seq	TRANSCRIPTOMIC	cDNA
SRR2015332 SRR2015333	SRX1022611	Illumina sequence of C. elegans N2 synchronized embryos at 90 minutes with Ribo-zero treated total RNA 20120419_EMB-90 RNAseq random fragment library 100bp PE RW0001	Caenorhabditis elegans	Illumina HiSeq 2000	UWGS-RW	SRP000401	Deep sequencing of the Caenorhabditis elegans transcriptome using RNA isolated from various developmental stages under various experimental conditions RW0001	SRS932445	12004282	2400856400	20120419_EMB-90	RNA-Seq	TRANSCRIPTOMIC	cDNA
SRR2015473 SRR2015474	SRX1022645	Illumina sequence of C. elegans N2 synchronized embryos at 120 minutes with Ribo-zero treated total RNA 20120419_EMB-120 RNAseq random fragment library 100bp PE RW0001	Caenorhabditis elegans	Illumina HiSeq 2000	UWGS-RW	SRP000401	Deep sequencing of the Caenorhabditis elegans transcriptome using RNA isolated from various developmental stages under various experimental conditions RW0001	SRS932475	13208615	2641723000	20120419_EMB-120	RNA-Seq	TRANSCRIPTOMIC	cDNA
SRR2015475 SRR2015476	SRX1022646	Illumina sequence of C. elegans N2 synchronized embryos at 150 minutes with Ribo-zero treated total RNA 20120419_EMB-150 RNAseq random fragment library 100bp PE RW0001	Caenorhabditis elegans	Illumina HiSeq 2000	UWGS-RW	SRP000401	Deep sequencing of the Caenorhabditis elegans transcriptome using RNA isolated from various developmental stages under various experimental conditions RW0001	SRS932476	8330060	1666012000	20120419_EMB-150	RNA-Seq	TRANSCRIPTOMIC	cDNA
SRR2015477 SRR2015478	SRX1022647	Illumina sequence of C. elegans N2 synchronized embryos at 180 minutes with Ribo-zero treated total RNA 20120419_EMB-180 RNAseq random fragment library 100bp PE RW0001	Caenorhabditis elegans	Illumina HiSeq 2000	UWGS-RW	SRP000401	Deep sequencing of the Caenorhabditis elegans transcriptome using RNA isolated from various developmental stages under various experimental conditions RW0001	SRS932477	11717499	2343499800	20120419_EMB-180	RNA-Seq	TRANSCRIPTOMIC	cDNA
SRR2015479 SRR2015480	SRX1022648	Illumina sequence of C. elegans N2 synchronized embryos at 240 minutes with Ribo-zero treated total RNA 20120419_EMB-240 RNAseq random fragment library 100bp PE RW0001	Caenorhabditis elegans	Illumina HiSeq 2000	UWGS-RW	SRP000401	Deep sequencing of the Caenorhabditis elegans transcriptome using RNA isolated from various developmental stages under various experimental conditions RW0001	SRS932478	18174954	3634990800	20120419_EMB-240	RNA-Seq	TRANSCRIPTOMIC	cDNA
SRR2015481 SRR2015482	SRX1022649	Illumina sequence of C. elegans N2 synchronized embryos at 270 minutes with Ribo-zero treated total RNA 20120419_EMB-270 RNAseq random fragment library 100bp PE RW0001	Caenorhabditis elegans	Illumina HiSeq 2000	UWGS-RW	SRP000401	Deep sequencing of the Caenorhabditis elegans transcriptome using RNA isolated from various developmental stages under various experimental conditions RW0001	SRS932479	9088450	1817690000	20120419_EMB-270	RNA-Seq	TRANSCRIPTOMIC	cDNA
SRR2015483 SRR2015484	SRX1022650	Illumina sequence of C. elegans N2 synchronized embryos at 300 minutes with Ribo-zero treated total RNA 20120419_EMB-300 RNAseq random fragment library 100bp PE RW0001	Caenorhabditis elegans	Illumina HiSeq 2000	UWGS-RW	SRP000401	Deep sequencing of the Caenorhabditis elegans transcriptome using RNA isolated from various developmental stages under various experimental conditions RW0001	SRS932480	9933366	1986673200	20120419_EMB-300	RNA-Seq	TRANSCRIPTOMIC	cDNA
SRR2015485 SRR2015486	SRX1022651	Illumina sequence of C. elegans N2 synchronized embryos at 330 minutes with Ribo-zero treated total RNA 20120419_EMB-330 RNAseq random fragment library 100bp PE RW0001	Caenorhabditis elegans	Illumina HiSeq 2000	UWGS-RW	SRP000401	Deep sequencing of the Caenorhabditis elegans transcriptome using RNA isolated from various developmental stages under various experimental conditions RW0001	SRS932481	18204922	3640984400	20120419_EMB-330	RNA-Seq	TRANSCRIPTOMIC	cDNA
SRR2015487 SRR2015488	SRX1022652	Illumina sequence of C. elegans N2 synchronized embryos at 360 minutes with Ribo-zero treated total RNA 20120419_EMB-360 RNAseq random fragment library 100bp PE RW0001	Caenorhabditis elegans	Illumina HiSeq 2000	UWGS-RW	SRP000401	Deep sequencing of the Caenorhabditis elegans transcriptome using RNA isolated from various developmental stages under various experimental conditions RW0001	SRS932482	11676360	2335272000	20120419_EMB-360	RNA-Seq	TRANSCRIPTOMIC	cDNA
SRR2015489 SRR2015490	SRX1022653	Illumina sequence of C. elegans N2 synchronized embryos at 420 minutes with Ribo-zero treated total RNA 20120419_EMB-420 RNAseq random fragment library 100bp PE RW0001	Caenorhabditis elegans	Illumina HiSeq 2000	UWGS-RW	SRP000401	Deep sequencing of the Caenorhabditis elegans transcriptome using RNA isolated from various developmental stages under various experimental conditions RW0001	SRS932483	10731431	2146286200	20120419_EMB-420	RNA-Seq	TRANSCRIPTOMIC	cDNA
SRR2015491 SRR2015492	SRX1022654	Illumina sequence of C. elegans N2 synchronized embryos at 450 minutes with Ribo-zero treated total RNA 20120419_EMB-450 RNAseq random fragment library 100bp PE RW0001	Caenorhabditis elegans	Illumina HiSeq 2000	UWGS-RW	SRP000401	Deep sequencing of the Caenorhabditis elegans transcriptome using RNA isolated from various developmental stages under various experimental conditions RW0001	SRS932484	12251362	2450272400	20120419_EMB-450	RNA-Seq	TRANSCRIPTOMIC	cDNA
SRR2039609 SRR2039610	SRX1037996	Illumina sequencing of C. elegans BY300 early embryo dopaminergic neuron library FGSR109 total RNA DSN treated RNAseq random fragment library 100bp PE RW0001	Caenorhabditis elegans	Illumina HiSeq 2000	UWGS-RW	SRP000401	Deep sequencing of the Caenorhabditis elegans transcriptome using RNA isolated from various developmental stages under various experimental conditions RW0001	SRS945157	Caenorhabditis elegans	1495.61	2	10516723	2103344600	DMM109_DA-nrn_EE	RNA-Seq	TRANSCRIPTOMIC	cDNA
SRR2039612 SRR2039613 SRR2039614	SRX1037997	Illumina sequencing of C. elegans DM8001 late embryo hypodermis library FGSR114 total RNA DSN treated RNAseq random fragment library 100bp PE RW0001	Caenorhabditis elegans	Illumina HiSeq 2000	UWGS-RW	SRP000401	Deep sequencing of the Caenorhabditis elegans transcriptome using RNA isolated from various developmental stages under various experimental conditions RW0001	SRS945158	Caenorhabditis elegans	706.74	3	5782034	1156406800	DMM114_hypodermis_LE	RNA-Seq	TRANSCRIPTOMIC	cDNA
SRR2039611	SRX1037998	Illumina sequencing of C. elegans DM8001 late embryo hypodermis library FGSR114 total RNA DSN treated RNAseq random fragment library 50bp SE RW0001	Caenorhabditis elegans	Illumina MiSeq	UWGS-RW	SRP000401	Deep sequencing of the Caenorhabditis elegans transcriptome using RNA isolated from various developmental stages under various experimental conditions RW0001	SRS945158	Caenorhabditis elegans	2.73	1	91317	4565850	DMM114_hypodermis_LE	RNA-Seq	TRANSCRIPTOMIC	cDNA
SRR2039615 SRR2039616	SRX1037999	Illumina sequencing of C. elegans BY300 early embryo dopaminergic neuron library FGSR110 total RNA DSN treated RNAseq random fragment library 100bp PE RW0001	Caenorhabditis elegans	Illumina HiSeq 2000	UWGS-RW	SRP000401	Deep sequencing of the Caenorhabditis elegans transcriptome using RNA isolated from various developmental stages under various experimental conditions RW0001	SRS945159	Caenorhabditis elegans	1753.02	2	12230632	2446126400	DMM110_DA-nrn_EE	RNA-Seq	TRANSCRIPTOMIC	cDNA
SRR2039618 SRR2039619 SRR2039620	SRX1038000	Illumina sequencing of C. elegans DM8001 late embryo hypodermis library FGSR123 total RNA DSN treated RNAseq random fragment library 100bp PE RW0001	Caenorhabditis elegans	Illumina HiSeq 2000	UWGS-RW	SRP000401	Deep sequencing of the Caenorhabditis elegans transcriptome using RNA isolated from various developmental stages under various experimental conditions RW0001	SRS945160	Caenorhabditis elegans	1400.98	3	11146109	2229221800	DMM123_hypodermis_LE	RNA-Seq	TRANSCRIPTOMIC	cDNA
SRR2039617	SRX1038001	Illumina sequencing of C. elegans DM8001 late embryo hypodermis library FGSR123 total RNA DSN treated RNAseq random fragment library 50bp SE RW0001	Caenorhabditis elegans	Illumina MiSeq	UWGS-RW	SRP000401	Deep sequencing of the Caenorhabditis elegans transcriptome using RNA isolated from various developmental stages under various experimental conditions RW0001	SRS945160	Caenorhabditis elegans	6.15	1	207499	10374950	DMM123_hypodermis_LE	RNA-Seq	TRANSCRIPTOMIC	cDNA
SRR360126 SRR360127 SRR473297 SRR473298	SRX103986	Illumina sequencing of C. elegans N2 young adult processed through single pass of Ribozero kit from Epicentre RNAseq random fragment library 100bp PE RW0001	Caenorhabditis elegans	Illumina HiSeq 2000	UWGS-RW	SRP000401	Deep sequencing of the Caenorhabditis elegans transcriptome using RNA isolated from various developmental stages under various experimental conditions RW0001	SRS269392	31396982	6279396400	N2_YA_RZ-1	RNA-Seq	TRANSCRIPTOMIC	cDNA
SRR360130	SRX103987	Illumina sequencing of C. elegans N2 young adult processed through single pass of Ribozero kit from Epicentre RNAseq random fragment library 100bp SE RW0001	Caenorhabditis elegans	Illumina HiSeq 2000	UWGS-RW	SRP000401	Deep sequencing of the Caenorhabditis elegans transcriptome using RNA isolated from various developmental stages under various experimental conditions RW0001	SRS269392	8909171	890917100	N2_YA_RZ-1	RNA-Seq	TRANSCRIPTOMIC	cDNA
SRR360129	SRX103988	Illumina sequencing of C. elegans N2 young adult processed through single pass of Ribozero kit from Epicentre RNAseq random fragment library 101bp PE RW0001	Caenorhabditis elegans	Illumina HiSeq 2000	UWGS-RW	SRP000401	Deep sequencing of the Caenorhabditis elegans transcriptome using RNA isolated from various developmental stages under various experimental conditions RW0001	SRS269392	5093861	1028959922	N2_YA_RZ-1	RNA-Seq	TRANSCRIPTOMIC	cDNA
SRR360128	SRX103989	Illumina sequencing of C. elegans N2 young adult processed through single pass of Ribozero kit from Epicentre RNAseq random fragment library 101bp SE RW0001	Caenorhabditis elegans	Illumina HiSeq 2000	UWGS-RW	SRP000401	Deep sequencing of the Caenorhabditis elegans transcriptome using RNA isolated from various developmental stages under various experimental conditions RW0001	SRS269392	12427560	1255183560	N2_YA_RZ-1	RNA-Seq	TRANSCRIPTOMIC	cDNA
SRR360132 SRR360133	SRX103990	Illumina sequencing of C. elegans N2 young adult sample -- Yad-1 ribominus sample 36bp SE RW0001	Caenorhabditis elegans	Illumina Genome Analyzer II	UWGS-RW	SRP000401	Deep sequencing of the Caenorhabditis elegans transcriptome using RNA isolated from various developmental stages under various experimental conditions RW0001	SRS269393	22980361	827292996	N2_Yad-1RR	RNA-Seq	TRANSCRIPTOMIC	cDNA
SRR360134	SRX103991	Illumina sequencing of C. elegans N2 young adult sample -- Yad-1 ribominus sample 76bp SE RW0001	Caenorhabditis elegans	Illumina Genome Analyzer II	UWGS-RW	SRP000401	Deep sequencing of the Caenorhabditis elegans transcriptome using RNA isolated from various developmental stages under various experimental conditions RW0001	SRS269393	2553197	194042972	N2_Yad-1RR	RNA-Seq	TRANSCRIPTOMIC	cDNA
SRR2043247 SRR2043248 SRR2043249	SRX1041553	Illumina sequencing of C. elegans SS747 early embryo Z2/Z3 cells library FGSR133 total RNA DSN treated RNAseq random fragment library 100bp PE RW0001	Caenorhabditis elegans	Illumina HiSeq 2000	UWGS-RW	SRP000401	Deep sequencing of the Caenorhabditis elegans transcriptome using RNA isolated from various developmental stages under various experimental conditions RW0001	SRS947949	Caenorhabditis elegans	1556.1	3	13103061	2620612200	DMM133_Z2Z3_EE	RNA-Seq	TRANSCRIPTOMIC	cDNA
SRR2043246	SRX1041554	Illumina sequencing of C. elegans SS747 early embryo Z2/Z3 cells library FGSR133 total RNA DSN treated RNAseq random fragment library 50bp SE RW0001	Caenorhabditis elegans	Illumina MiSeq	UWGS-RW	SRP000401	Deep sequencing of the Caenorhabditis elegans transcriptome using RNA isolated from various developmental stages under various experimental conditions RW0001	SRS947949	Caenorhabditis elegans	6.57	1	222647	11132350	DMM133_Z2Z3_EE	RNA-Seq	TRANSCRIPTOMIC	cDNA
SRR2043251 SRR2043252 SRR2043253	SRX1041556	Illumina sequencing of C. elegans MT17370 early embryo BAG neurons library FGSR206 total RNA DSN treated RNAseq random fragment library 100bp PE RW0001	Caenorhabditis elegans	Illumina HiSeq 2000	UWGS-RW	SRP000401	Deep sequencing of the Caenorhabditis elegans transcriptome using RNA isolated from various developmental stages under various experimental conditions RW0001	SRS947950	Caenorhabditis elegans	563.25	3	4517117	903423400	DMM206_BAG-nrn_EE	RNA-Seq	TRANSCRIPTOMIC	cDNA
SRR2043250	SRX1041557	Illumina sequencing of C. elegans MT17370 early embryo BAG neurons library FGSR206 total RNA DSN treated RNAseq random fragment library 50bp SE RW0001	Caenorhabditis elegans	Illumina MiSeq	UWGS-RW	SRP000401	Deep sequencing of the Caenorhabditis elegans transcriptome using RNA isolated from various developmental stages under various experimental conditions RW0001	SRS947950	Caenorhabditis elegans	2.56	1	85386	4269300	DMM206_BAG-nrn_EE	RNA-Seq	TRANSCRIPTOMIC	cDNA
SRR2043255 SRR2043256 SRR2043257	SRX1041558	Illumina sequencing of C. elegans NC2015 late embryo PVC neuron library FGSR202 total RNA DSN treated RNAseq random fragment library 100bp PE RW0001	Caenorhabditis elegans	Illumina HiSeq 2000	UWGS-RW	SRP000401	Deep sequencing of the Caenorhabditis elegans transcriptome using RNA isolated from various developmental stages under various experimental conditions RW0001	SRS947951	Caenorhabditis elegans	999.8	3	8028911	1605782200	DMM202_PVC-nrn_LE	RNA-Seq	TRANSCRIPTOMIC	cDNA
SRR2043254	SRX1041559	Illumina sequencing of C. elegans NC2015 late embryo PVC neuron library FGSR202 total RNA DSN treated RNAseq random fragment library 50bp SE RW0001	Caenorhabditis elegans	Illumina MiSeq	UWGS-RW	SRP000401	Deep sequencing of the Caenorhabditis elegans transcriptome using RNA isolated from various developmental stages under various experimental conditions RW0001	SRS947951	Caenorhabditis elegans	8.74	1	297716	14885800	DMM202_PVC-nrn_LE	RNA-Seq	TRANSCRIPTOMIC	cDNA
SRR2043259 SRR2043260 SRR2043261	SRX1041561	Illumina sequencing of C. elegans SS747 early embryo Z2/Z3 cells library FGSR135 total RNA DSN treated RNAseq random fragment library 100bp PE RW0001	Caenorhabditis elegans	Illumina HiSeq 2000	UWGS-RW	SRP000401	Deep sequencing of the Caenorhabditis elegans transcriptome using RNA isolated from various developmental stages under various experimental conditions RW0001	SRS947952	Caenorhabditis elegans	1882.03	3	15788810	3157762000	DMM135_Z2Z3_EE	RNA-Seq	TRANSCRIPTOMIC	cDNA
SRR2043258	SRX1041562	Illumina sequencing of C. elegans SS747 early embryo Z2/Z3 cells library FGSR135 total RNA DSN treated RNAseq random fragment library 50bp SE RW0001	Caenorhabditis elegans	Illumina MiSeq	UWGS-RW	SRP000401	Deep sequencing of the Caenorhabditis elegans transcriptome using RNA isolated from various developmental stages under various experimental conditions RW0001	SRS947952	Caenorhabditis elegans	7.07	1	240310	12015500	DMM135_Z2Z3_EE	RNA-Seq	TRANSCRIPTOMIC	cDNA
SRR2043263 SRR2043264 SRR2043265	SRX1041563	Illumina sequencing of C. elegans MT17370 early embryo BAG neurons library FGSR216 total RNA DSN treated RNAseq random fragment library 100bp PE RW0001	Caenorhabditis elegans	Illumina HiSeq 2000	UWGS-RW	SRP000401	Deep sequencing of the Caenorhabditis elegans transcriptome using RNA isolated from various developmental stages under various experimental conditions RW0001	SRS947953	Caenorhabditis elegans	754.32	3	6184025	1236805000	DMM216_BAG-nrn_EE	RNA-Seq	TRANSCRIPTOMIC	cDNA
SRR2043262	SRX1041564	Illumina sequencing of C. elegans MT17370 early embryo BAG neurons library FGSR216 total RNA DSN treated RNAseq random fragment library 50bp SE RW0001	Caenorhabditis elegans	Illumina MiSeq	UWGS-RW	SRP000401	Deep sequencing of the Caenorhabditis elegans transcriptome using RNA isolated from various developmental stages under various experimental conditions RW0001	SRS947953	Caenorhabditis elegans	8.1	1	278092	13904600	DMM216_BAG-nrn_EE	RNA-Seq	TRANSCRIPTOMIC	cDNA
SRR2043273 SRR2043274 SRR2043275	SRX1041571	Illumina sequencing of C. elegans NC2015 late embryo PVC neuron library FGSR220 total RNA DSN treated RNAseq random fragment library 100bp PE RW0001	Caenorhabditis elegans	Illumina HiSeq 2000	UWGS-RW	SRP000401	Deep sequencing of the Caenorhabditis elegans transcriptome using RNA isolated from various developmental stages under various experimental conditions RW0001	SRS947955	Caenorhabditis elegans	678.31	3	5452551	1090510200	DMM220_PVC-nrn_LE	RNA-Seq	TRANSCRIPTOMIC	cDNA
SRR2043272	SRX1041572	Illumina sequencing of C. elegans NC2015 late embryo PVC neuron library FGSR220 total RNA DSN treated RNAseq random fragment library 50bp SE RW0001	Caenorhabditis elegans	Illumina MiSeq	UWGS-RW	SRP000401	Deep sequencing of the Caenorhabditis elegans transcriptome using RNA isolated from various developmental stages under various experimental conditions RW0001	SRS947955	Caenorhabditis elegans	5.78	1	196598	9829900	DMM220_PVC-nrn_LE	RNA-Seq	TRANSCRIPTOMIC	cDNA
SRR2043333 SRR2043334	SRX1041638	Illumina sequencing of C. elegans GD74 early embryo pharyngeal gland cell library FGSR221 total RNA DSN treated RNAseq random fragment library 100bp PE RW0001	Caenorhabditis elegans	Illumina HiSeq 2000	UWGS-RW	SRP000401	Deep sequencing of the Caenorhabditis elegans transcriptome using RNA isolated from various developmental stages under various experimental conditions RW0001	SRS948017	Caenorhabditis elegans	1705.4	2	12709153	2541830600	DMM221_phar-gl_EE	RNA-Seq	TRANSCRIPTOMIC	cDNA
SRR2043337	SRX1041641	Illumina sequencing of C. elegans NC1924 larval L3/L4 pharyngeal gland cell library FGSR233 total RNA DSN treated RNAseq random fragment library 100bp PE RW0001	Caenorhabditis elegans	Illumina HiSeq 2000	UWGS-RW	SRP000401	Deep sequencing of the Caenorhabditis elegans transcriptome using RNA isolated from various developmental stages under various experimental conditions RW0001	SRS948018	Caenorhabditis elegans	628.31	1	5517925	1103585000	DMM223_phar-gl_L3	RNA-Seq	TRANSCRIPTOMIC	cDNA
SRR2043339 SRR2043340 SRR2043341	SRX1041642	Illumina sequencing of C. elegans NC1750 late embryo AVE neurons library FGSR228 total RNA DSN treated RNAseq random fragment library 100bp PE RW0001	Caenorhabditis elegans	Illumina HiSeq 2000	UWGS-RW	SRP000401	Deep sequencing of the Caenorhabditis elegans transcriptome using RNA isolated from various developmental stages under various experimental conditions RW0001	SRS948019	Caenorhabditis elegans	757.34	3	6086855	1217371000	DMM228_AVE-nrn_LE	RNA-Seq	TRANSCRIPTOMIC	cDNA
SRR2043338	SRX1041643	Illumina sequencing of C. elegans NC1750 late embryo AVE neurons library FGSR228 total RNA DSN treated RNAseq random fragment library 50bp SE RW0001	Caenorhabditis elegans	Illumina MiSeq	UWGS-RW	SRP000401	Deep sequencing of the Caenorhabditis elegans transcriptome using RNA isolated from various developmental stages under various experimental conditions RW0001	SRS948019	Caenorhabditis elegans	6.59	1	223045	11152250	DMM228_AVE-nrn_LE	RNA-Seq	TRANSCRIPTOMIC	cDNA
SRR2043342 SRR2043343	SRX1041644	Illumina sequencing of C. elegans NC1924 larval L3/L4 pharyngeal gland cell library FGSR222 total RNA DSN treated RNAseq random fragment library 100bp PE RW0001	Caenorhabditis elegans	Illumina HiSeq 2000	UWGS-RW	SRP000401	Deep sequencing of the Caenorhabditis elegans transcriptome using RNA isolated from various developmental stages under various experimental conditions RW0001	SRS948020	Caenorhabditis elegans	2399.17	2	16945570	3389114000	DMM222_phar-gl_L3	RNA-Seq	TRANSCRIPTOMIC	cDNA
SRR2043346 SRR2043347 SRR2043348	SRX1041646	Illumina sequencing of C. elegans NC1750 late embryo AVE neurons library FGSR229 total RNA DSN treated RNAseq random fragment library 100bp PE RW0001	Caenorhabditis elegans	Illumina HiSeq 2000	UWGS-RW	SRP000401	Deep sequencing of the Caenorhabditis elegans transcriptome using RNA isolated from various developmental stages under various experimental conditions RW0001	SRS948021	Caenorhabditis elegans	613.29	3	4928899	985779800	DMM229_AVE-nrn_LE	RNA-Seq	TRANSCRIPTOMIC	cDNA
SRR2043345	SRX1041647	Illumina sequencing of C. elegans NC1750 late embryo AVE neurons library FGSR229 total RNA DSN treated RNAseq random fragment library 50bp SE RW0001	Caenorhabditis elegans	Illumina MiSeq	UWGS-RW	SRP000401	Deep sequencing of the Caenorhabditis elegans transcriptome using RNA isolated from various developmental stages under various experimental conditions RW0001	SRS948021	Caenorhabditis elegans	4.47	1	150104	7505200	DMM229_AVE-nrn_LE	RNA-Seq	TRANSCRIPTOMIC	cDNA
SRR2043368 SRR2043369	SRX1041666	Illumina sequencing of C. elegans GD74 early embryo pharyngeal gland cell library FGSR230 total RNA DSN treated RNAseq random fragment library 100bp PE RW0001	Caenorhabditis elegans	Illumina HiSeq 2000	UWGS-RW	SRP000401	Deep sequencing of the Caenorhabditis elegans transcriptome using RNA isolated from various developmental stages under various experimental conditions RW0001	SRS948034	Caenorhabditis elegans	2001.29	2	15744698	3148939600	DMM230_phar-gl_EE	RNA-Seq	TRANSCRIPTOMIC	cDNA
SRR2043471	SRX1041748	Illumina sequencing of C. elegans NC1924 larval L3/L4 pharyngeal gland cell library FGSR233 total RNA DSN treated RNAseq random fragment library 100bp PE RW0001	Caenorhabditis elegans	Illumina HiSeq 2000	UWGS-RW	SRP000401	Deep sequencing of the Caenorhabditis elegans transcriptome using RNA isolated from various developmental stages under various experimental conditions RW0001	SRS948018	Caenorhabditis elegans	3630.59	1	24912399	4982479800	DMM233_phar-gl_L3	RNA-Seq	TRANSCRIPTOMIC	cDNA
SRR2054400 SRR2054401	SRX1051870	Illumina sequencing of C. elegans IX823 larval L2 AFD thermosensory neuron library FGSR234 total RNA DSN treated RNAseq random fragment library 100bp PE RW0001	Caenorhabditis elegans	Illumina HiSeq 2000	UWGS-RW	SRP000401	Deep sequencing of the Caenorhabditis elegans transcriptome using RNA isolated from various developmental stages under various experimental conditions RW0001	SRS956005	Caenorhabditis elegans	2348.51	2	16490549	3298109800	DMM234_AFD-nrn_L2	RNA-Seq	TRANSCRIPTOMIC	cDNA
SRR2054403	SRX1051871	Illumina sequencing of C. elegans CB4689 N2 larval L4 males L4_M-2 ribozero low input treated total RNA RNAseq random fragment library 100bp PE RW0001	Caenorhabditis elegans	Illumina HiSeq 2000	UWGS-RW	SRP000401	Deep sequencing of the Caenorhabditis elegans transcriptome using RNA isolated from various developmental stages under various experimental conditions RW0001	SRS956006	31166336	6233267200	CB4689_L4_M-2_2-MRZ	RNA-Seq	TRANSCRIPTOMIC	cDNA
SRR2054404 SRR2054405	SRX1051872	Illumina sequencing of C. elegans N2 larval L1 reference cells library FGSR236 total RNA DSN treated RNAseq random fragment library 100bp PE RW0001	Caenorhabditis elegans	Illumina HiSeq 2000	UWGS-RW	SRP000401	Deep sequencing of the Caenorhabditis elegans transcriptome using RNA isolated from various developmental stages under various experimental conditions RW0001	SRS956007	12710233	2542046600	DMM236_N2all_L1	RNA-Seq	TRANSCRIPTOMIC	cDNA
SRR2054407 SRR2054408 SRR2054409 SRR2054410	SRX1051873	Illumina sequencing of C. elegans DZ685 embryonic Z1/Z4 cells library FGSR238 total RNA DSN treated RNAseq random fragment library 100bp PE RW0001	Caenorhabditis elegans	Illumina HiSeq 2000	UWGS-RW	SRP000401	Deep sequencing of the Caenorhabditis elegans transcriptome using RNA isolated from various developmental stages under various experimental conditions RW0001	SRS956008	Caenorhabditis elegans	930.71	4	6693479	1338695800	DMM238_Z1Z4_Em	RNA-Seq	TRANSCRIPTOMIC	cDNA
SRR2054406	SRX1051874	Illumina sequencing of C. elegans DZ685 embryonic Z1/Z4 cells library FGSR238 total RNA DSN treated RNAseq random fragment library 50bp SE RW0001	Caenorhabditis elegans	Illumina MiSeq	UWGS-RW	SRP000401	Deep sequencing of the Caenorhabditis elegans transcriptome using RNA isolated from various developmental stages under various experimental conditions RW0001	SRS956008	Caenorhabditis elegans	1.32	1	42539	2126950	DMM238_Z1Z4_Em	RNA-Seq	TRANSCRIPTOMIC	cDNA
SRR2054411 SRR2054412	SRX1051875	Illumina sequencing of C. elegans N2 larval L1 reference cells library FGSR251 total RNA DSN treated RNAseq random fragment library 100bp PE RW0001	Caenorhabditis elegans	Illumina HiSeq 2000	UWGS-RW	SRP000401	Deep sequencing of the Caenorhabditis elegans transcriptome using RNA isolated from various developmental stages under various experimental conditions RW0001	SRS956009	6726457	1345291400	DMM251_N2all_L1	RNA-Seq	TRANSCRIPTOMIC	cDNA
SRR2054415 SRR2054416 SRR2054417	SRX1051877	Illumina sequencing of C. elegans CZ1921 early embryo RME neurons library FGSR254 total RNA DSN treated RNAseq random fragment library 100bp PE RW0001	Caenorhabditis elegans	Illumina HiSeq 2000	UWGS-RW	SRP000401	Deep sequencing of the Caenorhabditis elegans transcriptome using RNA isolated from various developmental stages under various experimental conditions RW0001	SRS956011	Caenorhabditis elegans	700.14	3	5619116	1123823200	DMM254_RME-nrn_EE	RNA-Seq	TRANSCRIPTOMIC	cDNA
SRR2054414	SRX1051878	Illumina sequencing of C. elegans CZ1921 early embryo RME neurons library FGSR254 total RNA DSN treated RNAseq random fragment library 50bp SE RW0001	Caenorhabditis elegans	Illumina MiSeq	UWGS-RW	SRP000401	Deep sequencing of the Caenorhabditis elegans transcriptome using RNA isolated from various developmental stages under various experimental conditions RW0001	SRS956011	Caenorhabditis elegans	5.05	1	170633	8531650	DMM254_RME-nrn_EE	RNA-Seq	TRANSCRIPTOMIC	cDNA
SRR2054419 SRR2054420 SRR2054421	SRX1051879	Illumina sequencing of C. elegans CZ1921 early embryo RME neurons library FGSR255 total RNA DSN treated RNAseq random fragment library 100bp PE RW0001	Caenorhabditis elegans	Illumina HiSeq 2000	UWGS-RW	SRP000401	Deep sequencing of the Caenorhabditis elegans transcriptome using RNA isolated from various developmental stages under various experimental conditions RW0001	SRS956012	Caenorhabditis elegans	512.76	3	4094244	818848800	DMM255_RME-nrn_EE	RNA-Seq	TRANSCRIPTOMIC	cDNA
SRR363796	SRX105188	GSM829554: 4SU_GLD1_PARCLIP_1	Caenorhabditis elegans	Illumina Genome Analyzer II	GEO	SRP009256	In vivo and transcriptome-wide identification of RNA-binding protein target sites [PAR-CLIP]	SRS270025		791.96	1	33646400	1211270400	GSM829554: 4SU_GLD1_PARCLIP_1	RNA-Seq	TRANSCRIPTOMIC	cDNA
SRR2054418	SRX1051880	Illumina sequencing of C. elegans CZ1921 early embryo RME neurons library FGSR255 total RNA DSN treated RNAseq random fragment library 50bp SE RW0001	Caenorhabditis elegans	Illumina MiSeq	UWGS-RW	SRP000401	Deep sequencing of the Caenorhabditis elegans transcriptome using RNA isolated from various developmental stages under various experimental conditions RW0001	SRS956012	Caenorhabditis elegans	4.8	1	162064	8103200	DMM255_RME-nrn_EE	RNA-Seq	TRANSCRIPTOMIC	cDNA
SRR2054422 SRR2054423	SRX1051881	DMM253_mec-nrn_L1 RNAseq 100bp PE RW0001	Caenorhabditis elegans	Illumina HiSeq 2000	UWGS-RW	SRP000401	Deep sequencing of the Caenorhabditis elegans transcriptome using RNA isolated from various developmental stages under various experimental conditions RW0001	SRS956013	Caenorhabditis elegans	1681.33	2	11747764	2349552800	DMM253_mec-nrn_L1	RNA-Seq	TRANSCRIPTOMIC	cDNA
SRR2054424 SRR2054425	SRX1051882	Illumina sequencing of C. elegans mec-4 mRNA-1 ALM PLM mechanosensory neuron library FGSR252 total RNA DSN treated RNAseq random fragment library 100bp PE RW0001	Caenorhabditis elegans	Illumina HiSeq 2000	UWGS-RW	SRP000401	Deep sequencing of the Caenorhabditis elegans transcriptome using RNA isolated from various developmental stages under various experimental conditions RW0001	SRS956014	Caenorhabditis elegans	2610.37	2	18336576	3667315200	DMM252_mec-nrn_L1	RNA-Seq	TRANSCRIPTOMIC	cDNA
SRR2054427 SRR2054428 SRR2054429	SRX1051883	Illumina sequencing of C. elegans N2 early embryo reference cells library FGSR271 total RNA DSN treated RNAseq random fragment library 100bp PE RW0001	Caenorhabditis elegans	Illumina HiSeq 2000	UWGS-RW	SRP000401	Deep sequencing of the Caenorhabditis elegans transcriptome using RNA isolated from various developmental stages under various experimental conditions RW0001	SRS956015	4358517	871703400	DMM271_N2ref_EE	RNA-Seq	TRANSCRIPTOMIC	cDNA
SRR2054426	SRX1051884	Illumina sequencing of C. elegans N2 early embryo reference cells library FGSR271 total RNA DSN treated RNAseq random fragment library 50bp SE RW0001	Caenorhabditis elegans	Illumina MiSeq	UWGS-RW	SRP000401	Deep sequencing of the Caenorhabditis elegans transcriptome using RNA isolated from various developmental stages under various experimental conditions RW0001	SRS956015	107403	5370150	DMM271_N2ref_EE	RNA-Seq	TRANSCRIPTOMIC	cDNA
SRR2054430 SRR2054431	SRX1051885	Illumina sequencing of C. elegans os1914 sheath cells of the cephalic sensilla library FGSR256 total RNA DSN treated RNAseq random fragment library 100bp PE RW0001	Caenorhabditis elegans	Illumina HiSeq 2000	UWGS-RW	SRP000401	Deep sequencing of the Caenorhabditis elegans transcriptome using RNA isolated from various developmental stages under various experimental conditions RW0001	SRS956016	Caenorhabditis elegans	1074.8	2	8377339	1675467800	DMM256_cep-sh_LE	RNA-Seq	TRANSCRIPTOMIC	cDNA
SRR2054432 SRR2054433	SRX1051886	Illumina sequencing of C. elegans CB6845 rectal epithelial cells library FGSR277 total RNA DSN treated RNAseq random fragment library 100bp PE RW0001	Caenorhabditis elegans	Illumina HiSeq 2000	UWGS-RW	SRP000401	Deep sequencing of the Caenorhabditis elegans transcriptome using RNA isolated from various developmental stages under various experimental conditions RW0001	SRS956017	Caenorhabditis elegans	1114.76	2	8495670	1699134000	DMM277_rec-epi_L3	RNA-Seq	TRANSCRIPTOMIC	cDNA
SRR2054435 SRR2054436 SRR2054437 SRR2054438	SRX1051887	Illumina sequencing of C. elegans JR667 embryonic seam cells library FGSR288 total RNA DSN treated RNAseq random fragment library 100bp PE RW0001	Caenorhabditis elegans	Illumina HiSeq 2000	UWGS-RW	SRP000401	Deep sequencing of the Caenorhabditis elegans transcriptome using RNA isolated from various developmental stages under various experimental conditions RW0001	SRS956018	Caenorhabditis elegans	1071.38	4	7882006	1576401200	DMM288_seam_Em	RNA-Seq	TRANSCRIPTOMIC	cDNA
SRR2054434	SRX1051888	Illumina sequencing of C. elegans JR667 embryonic seam cells library FGSR288 total RNA DSN treated RNAseq random fragment library 50bp SE RW0001	Caenorhabditis elegans	Illumina MiSeq	UWGS-RW	SRP000401	Deep sequencing of the Caenorhabditis elegans transcriptome using RNA isolated from various developmental stages under various experimental conditions RW0001	SRS956018	Caenorhabditis elegans	0.52	1	15354	767700	DMM288_seam_Em	RNA-Seq	TRANSCRIPTOMIC	cDNA
SRR2054440 SRR2054441 SRR2054442 SRR2054443	SRX1051889	Illumina sequencing of C. elegans JR667 embryonic seam cells library FGSR295 total RNA DSN treated RNAseq random fragment library 100bp PE RW0001	Caenorhabditis elegans	Illumina HiSeq 2000	UWGS-RW	SRP000401	Deep sequencing of the Caenorhabditis elegans transcriptome using RNA isolated from various developmental stages under various experimental conditions RW0001	SRS956019	Caenorhabditis elegans	397.02	4	2762547	552509400	DMM295_seam_Em	RNA-Seq	TRANSCRIPTOMIC	cDNA
SRR363797	SRX105189	GSM829555: 4SU_GLD1_PARCLIP_2	Caenorhabditis elegans	Illumina Genome Analyzer II	GEO	SRP009256	In vivo and transcriptome-wide identification of RNA-binding protein target sites [PAR-CLIP]	SRS270026		789.09	1	33696385	1213069860	GSM829555: 4SU_GLD1_PARCLIP_2	RNA-Seq	TRANSCRIPTOMIC	cDNA
SRR2054439	SRX1051890	Illumina sequencing of C. elegans JR667 embryonic seam cells library FGSR295 total RNA DSN treated RNAseq random fragment library 50bp SE RW0001	Caenorhabditis elegans	Illumina MiSeq	UWGS-RW	SRP000401	Deep sequencing of the Caenorhabditis elegans transcriptome using RNA isolated from various developmental stages under various experimental conditions RW0001	SRS956019	Caenorhabditis elegans	0.14	1	2132	106600	DMM295_seam_Em	RNA-Seq	TRANSCRIPTOMIC	cDNA
SRR2054444 SRR2054445	SRX1051891	Illumina sequencing of C. elegans CB6845 rectal epithelial cells library FGSR276 total RNA DSN treated RNAseq random fragment library 100bp PE RW0001	Caenorhabditis elegans	Illumina HiSeq 2000	UWGS-RW	SRP000401	Deep sequencing of the Caenorhabditis elegans transcriptome using RNA isolated from various developmental stages under various experimental conditions RW0001	SRS956020	Caenorhabditis elegans	2928.78	2	20633527	4126705400	DMM276_rec-epi_L3	RNA-Seq	TRANSCRIPTOMIC	cDNA
SRR2054446	SRX1051892	Illumina sequencing of C. elegans os1914 sheath cells of the cephalic sensilla library FGSR301 total RNA DSN treated RNAseq random fragment library 100bp PE RW0001	Caenorhabditis elegans	Illumina HiSeq 2000	UWGS-RW	SRP000401	Deep sequencing of the Caenorhabditis elegans transcriptome using RNA isolated from various developmental stages under various experimental conditions RW0001	SRS956021	Caenorhabditis elegans	2385.56	1	20420848	4084169600	DMM301_cep-sh_LE	RNA-Seq	TRANSCRIPTOMIC	cDNA
SRR2054447 SRR2054448	SRX1051893	Illumina sequencing of C. elegans ttr-39 mRNA-1 GABAergic neurons DDs library FGSR303 total RNA DSN treated RNAseq random fragment library 100bp PE RW0001	Caenorhabditis elegans	Illumina HiSeq 2000	UWGS-RW	SRP000401	Deep sequencing of the Caenorhabditis elegans transcriptome using RNA isolated from various developmental stages under various experimental conditions RW0001	SRS956022	Caenorhabditis elegans	1548.24	2	10838563	2167712600	DMM303_GABA-nrn_L1	RNA-Seq	TRANSCRIPTOMIC	cDNA
SRR2054449 SRR2054450	SRX1051894	Illumina sequencing of C. elegans ttr-39 mRNA-1 GABAergic neurons DDs library FGSR302 total RNA DSN treated RNAseq random fragment library 100bp PE RW0001	Caenorhabditis elegans	Illumina HiSeq 2000	UWGS-RW	SRP000401	Deep sequencing of the Caenorhabditis elegans transcriptome using RNA isolated from various developmental stages under various experimental conditions RW0001	SRS956023	Caenorhabditis elegans	3692.36	2	25945464	5189092800	DMM302_GABA-nrn_L1	RNA-Seq	TRANSCRIPTOMIC	cDNA
SRR2054451 SRR2054452	SRX1051895	Illumina sequencing of C. elegans IX823 larval L2 AFD thermosensory neuron library FGSR319 total RNA DSN treated RNAseq random fragment library 100bp PE RW0001	Caenorhabditis elegans	Illumina HiSeq 2000	UWGS-RW	SRP000401	Deep sequencing of the Caenorhabditis elegans transcriptome using RNA isolated from various developmental stages under various experimental conditions RW0001	SRS956024	Caenorhabditis elegans	1609.41	2	11261231	2252246200	DMM319_AFD-nrn_L2	RNA-Seq	TRANSCRIPTOMIC	cDNA
SRR2054455 SRR2054456 SRR2054457	SRX1051896	Illumina sequencing of C. elegans NW1229 larval L1 all neuron library FGSR391 total RNA DSN treated RNAseq random fragment library 100bp PE RW0001	Caenorhabditis elegans	Illumina HiSeq 2000	UWGS-RW	SRP000401	Deep sequencing of the Caenorhabditis elegans transcriptome using RNA isolated from various developmental stages under various experimental conditions RW0001	SRS956025	Caenorhabditis elegans	1383.83	3	12099516	2419903200	DMM391_all-nrn_L1-2	RNA-Seq	TRANSCRIPTOMIC	cDNA
SRR2054454	SRX1051897	Illumina sequencing of C. elegans NW1229 larval L1 all neuron library FGSR391 total RNA DSN treated RNAseq random fragment library 50bp SE RW0001	Caenorhabditis elegans	Illumina MiSeq	UWGS-RW	SRP000401	Deep sequencing of the Caenorhabditis elegans transcriptome using RNA isolated from various developmental stages under various experimental conditions RW0001	SRS956025	Caenorhabditis elegans	5.08	1	187233	9361650	DMM391_all-nrn_L1-2	RNA-Seq	TRANSCRIPTOMIC	cDNA
SRR2054460 SRR2054461 SRR2054462	SRX1051899	Illumina sequencing of C. elegans NC2525 larval L2 VA neuron library FGSR422 total RNA DSN treated RNAseq random fragment library 100bp PE RW0001	Caenorhabditis elegans	Illumina HiSeq 2000	UWGS-RW	SRP000401	Deep sequencing of the Caenorhabditis elegans transcriptome using RNA isolated from various developmental stages under various experimental conditions RW0001	SRS956027	Caenorhabditis elegans	905.43	3	7483915	1496783000	DMM422_unc4-VA-nrn_L2	RNA-Seq	TRANSCRIPTOMIC	cDNA
SRR363798	SRX105190	GSM829556: 4SU_GLD1_PARCLIP_3	Caenorhabditis elegans	Illumina Genome Analyzer II	GEO	SRP009256	In vivo and transcriptome-wide identification of RNA-binding protein target sites [PAR-CLIP]	SRS270027		826.46	1	34800513	1252818468	GSM829556: 4SU_GLD1_PARCLIP_3	RNA-Seq	TRANSCRIPTOMIC	cDNA
SRR2054459	SRX1051900	Illumina sequencing of C. elegans NC2525 larval L2 VA neuron library FGSR422 total RNA DSN treated RNAseq random fragment library 50bp SE RW0001	Caenorhabditis elegans	Illumina MiSeq	UWGS-RW	SRP000401	Deep sequencing of the Caenorhabditis elegans transcriptome using RNA isolated from various developmental stages under various experimental conditions RW0001	SRS956027	Caenorhabditis elegans	4.79	1	161472	8073600	DMM422_unc4-VA-nrn_L2	RNA-Seq	TRANSCRIPTOMIC	cDNA
SRR2054464 SRR2054465 SRR2054466	SRX1051901	Illumina sequencing of C. elegans NC2525 larval L2 VA neuron library FGSR420 total RNA DSN treated RNAseq random fragment library 100bp PE RW0001	Caenorhabditis elegans	Illumina HiSeq 2000	UWGS-RW	SRP000401	Deep sequencing of the Caenorhabditis elegans transcriptome using RNA isolated from various developmental stages under various experimental conditions RW0001	SRS956028	Caenorhabditis elegans	1412.46	3	12016641	2403328200	DMM420_unc4-VA-nrn_L2	RNA-Seq	TRANSCRIPTOMIC	cDNA
SRR2054463	SRX1051902	Illumina sequencing of C. elegans NC2525 larval L2 VA neuron library FGSR420 total RNA DSN treated RNAseq random fragment library 50bp SE RW0001	Caenorhabditis elegans	Illumina MiSeq	UWGS-RW	SRP000401	Deep sequencing of the Caenorhabditis elegans transcriptome using RNA isolated from various developmental stages under various experimental conditions RW0001	SRS956028	Caenorhabditis elegans	6.17	1	208910	10445500	DMM420_unc4-VA-nrn_L2	RNA-Seq	TRANSCRIPTOMIC	cDNA
SRR2054468 SRR2054469 SRR2054470	SRX1051903	Illumina sequencing of C. elegans N2 late embryo reference cells library FGSR426 total RNA DSN treated RNAseq random fragment library 100bp PE RW0001	Caenorhabditis elegans	Illumina HiSeq 2000	UWGS-RW	SRP000401	Deep sequencing of the Caenorhabditis elegans transcriptome using RNA isolated from various developmental stages under various experimental conditions RW0001	SRS956029	4417160	883432000	DMM426_N2ref_LE	RNA-Seq	TRANSCRIPTOMIC	cDNA
SRR2054467	SRX1051904	Illumina sequencing of C. elegans N2 late embryo reference cells library FGSR426 total RNA DSN treated RNAseq random fragment library 50bp SE RW0001	Caenorhabditis elegans	Illumina MiSeq	UWGS-RW	SRP000401	Deep sequencing of the Caenorhabditis elegans transcriptome using RNA isolated from various developmental stages under various experimental conditions RW0001	SRS956029	77026	3851300	DMM426_N2ref_LE	RNA-Seq	TRANSCRIPTOMIC	cDNA
SRR2054472 SRR2054473 SRR2054474	SRX1051905	Illumina sequencing of C. elegans NC2525 larval L2 VA neuron library FGSR423 total RNA DSN treated RNAseq random fragment library 100bp PE RW0001	Caenorhabditis elegans	Illumina HiSeq 2000	UWGS-RW	SRP000401	Deep sequencing of the Caenorhabditis elegans transcriptome using RNA isolated from various developmental stages under various experimental conditions RW0001	SRS956030	Caenorhabditis elegans	625.74	3	5105244	1021048800	DMM423_unc4-VA-nrn_L2	RNA-Seq	TRANSCRIPTOMIC	cDNA
SRR2054471	SRX1051906	Illumina sequencing of C. elegans NC2525 larval L2 VA neuron library FGSR423 total RNA DSN treated RNAseq random fragment library 50bp SE RW0001	Caenorhabditis elegans	Illumina MiSeq	UWGS-RW	SRP000401	Deep sequencing of the Caenorhabditis elegans transcriptome using RNA isolated from various developmental stages under various experimental conditions RW0001	SRS956030	Caenorhabditis elegans	3.48	1	116284	5814200	DMM423_unc4-VA-nrn_L2	RNA-Seq	TRANSCRIPTOMIC	cDNA
SRR2054476 SRR2054477 SRR2054478	SRX1051907	Illumina sequencing of C. elegans N2 late embryo reference cells library FGSR427 total RNA DSN treated RNAseq random fragment library 100bp PE RW0001	Caenorhabditis elegans	Illumina HiSeq 2000	UWGS-RW	SRP000401	Deep sequencing of the Caenorhabditis elegans transcriptome using RNA isolated from various developmental stages under various experimental conditions RW0001	SRS956031	5365437	1073087400	DMM427_N2ref_LE	RNA-Seq	TRANSCRIPTOMIC	cDNA
SRR2054475	SRX1051908	Illumina sequencing of C. elegans N2 late embryo reference cells library FGSR427 total RNA DSN treated RNAseq random fragment library 50bp SE RW0001	Caenorhabditis elegans	Illumina MiSeq	UWGS-RW	SRP000401	Deep sequencing of the Caenorhabditis elegans transcriptome using RNA isolated from various developmental stages under various experimental conditions RW0001	SRS956031	139697	6984850	DMM427_N2ref_LE	RNA-Seq	TRANSCRIPTOMIC	cDNA
SRR363799	SRX105191	GSM829557: 6SG_GLD1_PARCLIP_1	Caenorhabditis elegans	Illumina Genome Analyzer II	GEO	SRP009256	In vivo and transcriptome-wide identification of RNA-binding protein target sites [PAR-CLIP]	SRS270028		821.11	1	34977793	1259200548	GSM829557: 6SG_GLD1_PARCLIP_1	RNA-Seq	TRANSCRIPTOMIC	cDNA
SRR2054480	SRX1051910	Illumina sequencing of C. elegans N2 early embryo EE_60-600 SPIA amplified ribozero treated total RNA RNAseq random fragment library 100bp PE RW0001	Caenorhabditis elegans	Illumina HiSeq 2000	UWGS-RW	SRP000401	Deep sequencing of the Caenorhabditis elegans transcriptome using RNA isolated from various developmental stages under various experimental conditions RW0001	SRS956032	5974315	1194863000	EM_60-600_set1_RZ_SPIA	RNA-Seq	TRANSCRIPTOMIC	cDNA
SRR2054479	SRX1051911	Illumina sequencing of C. elegans N2 early embryo EE_60-600 SPIA amplified ribozero treated total RNA RNAseq random fragment library 50bp SE RW0001	Caenorhabditis elegans	Illumina MiSeq	UWGS-RW	SRP000401	Deep sequencing of the Caenorhabditis elegans transcriptome using RNA isolated from various developmental stages under various experimental conditions RW0001	SRS956032	171787	8589350	EM_60-600_set1_RZ_SPIA	RNA-Seq	TRANSCRIPTOMIC	cDNA
SRR2054482 SRR2054483 SRR2054484	SRX1051912	Illumina sequencing of C. elegans NW1229 larval L1 all neuron library FGSR391 total RNA DSN treated RNAseq random fragment library 100bp PE RW0001	Caenorhabditis elegans	Illumina HiSeq 2000	UWGS-RW	SRP000401	Deep sequencing of the Caenorhabditis elegans transcriptome using RNA isolated from various developmental stages under various experimental conditions RW0001	SRS956025	Caenorhabditis elegans	5230.5	3	44321733	8864346600	DMM391_all-nrn_L1-1	RNA-Seq	TRANSCRIPTOMIC	cDNA
SRR2054481	SRX1051913	Illumina sequencing of C. elegans NW1229 larval L1 all neuron library FGSR391 total RNA DSN treated RNAseq random fragment library 50bp SE RW0001	Caenorhabditis elegans	Illumina MiSeq	UWGS-RW	SRP000401	Deep sequencing of the Caenorhabditis elegans transcriptome using RNA isolated from various developmental stages under various experimental conditions RW0001	SRS956025	Caenorhabditis elegans	9.62	1	327739	16386950	DMM391_all-nrn_L1-1	RNA-Seq	TRANSCRIPTOMIC	cDNA
SRR2054486 SRR2054487	SRX1051914	Illumina sequencing of C. elegans N2 larval L4 library N2_L4-2 treated with ribozero low input total RNA RNAseq random fragment library 100bp PE RW0001	Caenorhabditis elegans	Illumina HiSeq 2000	UWGS-RW	SRP000401	Deep sequencing of the Caenorhabditis elegans transcriptome using RNA isolated from various developmental stages under various experimental conditions RW0001	SRS956033	5809531	1161906200	N2_L4-2-RZ	RNA-Seq	TRANSCRIPTOMIC	cDNA
SRR2054485	SRX1051915	Illumina sequencing of C. elegans N2 larval L4 library N2_L4-2 treated with ribozero low input total RNA RNAseq random fragment library 50bp SE RW0001	Caenorhabditis elegans	Illumina MiSeq	UWGS-RW	SRP000401	Deep sequencing of the Caenorhabditis elegans transcriptome using RNA isolated from various developmental stages under various experimental conditions RW0001	SRS956033	529308	26465400	N2_L4-2-RZ	RNA-Seq	TRANSCRIPTOMIC	cDNA
SRR2054489 SRR2054490	SRX1051916	Illumina sequencing of C. elegans N2 young adult YA library N2_YA-2 treated with ribozero total RNA RNAseq random fragment library 100bp PE RW0001	Caenorhabditis elegans	Illumina HiSeq 2000	UWGS-RW	SRP000401	Deep sequencing of the Caenorhabditis elegans transcriptome using RNA isolated from various developmental stages under various experimental conditions RW0001	SRS956034	6721432	1344286400	N2_YA-2-RZ	RNA-Seq	TRANSCRIPTOMIC	cDNA
SRR2054488	SRX1051917	Illumina sequencing of C. elegans N2 young adult YA library N2_YA-2 treated with ribozero total RNA RNAseq random fragment library 50bp SE RW0001	Caenorhabditis elegans	Illumina MiSeq	UWGS-RW	SRP000401	Deep sequencing of the Caenorhabditis elegans transcriptome using RNA isolated from various developmental stages under various experimental conditions RW0001	SRS956034	721423	36071150	N2_YA-2-RZ	RNA-Seq	TRANSCRIPTOMIC	cDNA
SRR2054492 SRR2054493 SRR2054494	SRX1051918	Illumina sequencing of C. elegans N2 young adult YA library N2_YA_RZ-52 treated with ribozero total RNA RNAseq random fragment library 100bp PE RW0001	Caenorhabditis elegans	Illumina HiSeq 2000	UWGS-RW	SRP000401	Deep sequencing of the Caenorhabditis elegans transcriptome using RNA isolated from various developmental stages under various experimental conditions RW0001	SRS956035	3165999	633199800	N2_YA_RZ-52	RNA-Seq	TRANSCRIPTOMIC	cDNA
SRR2054491	SRX1051919	Illumina sequencing of C. elegans N2 young adult YA library N2_YA_RZ-52 treated with ribozero total RNA RNAseq random fragment library 50bp SE RW0001	Caenorhabditis elegans	Illumina MiSeq	UWGS-RW	SRP000401	Deep sequencing of the Caenorhabditis elegans transcriptome using RNA isolated from various developmental stages under various experimental conditions RW0001	SRS956035	54334	2716700	N2_YA_RZ-52	RNA-Seq	TRANSCRIPTOMIC	cDNA
SRR363980	SRX105293	GSM830123: WHOLE_WORM_WILDTYPE	Caenorhabditis elegans	Illumina HiSeq 2000	GEO	SRP009274	In vivo and transcriptome-wide identification of RNA-binding protein target sites [RNA-Seq]	SRS270136		10516.7	1	86776631	17355326200	GSM830123: WHOLE_WORM_WILDTYPE	RNA-Seq	TRANSCRIPTOMIC	other
SRR363981	SRX105294	GSM830124: WHOLE_WORM_glp4	Caenorhabditis elegans	Illumina HiSeq 2000	GEO	SRP009274	In vivo and transcriptome-wide identification of RNA-binding protein target sites [RNA-Seq]	SRS270137		9189.4	1	76081136	15216227200	GSM830124: WHOLE_WORM_glp4	RNA-Seq	TRANSCRIPTOMIC	other
SRR2086384	SRX1080471	C. elegans isolate CB4856 YoungAdult RNA-Seq	Caenorhabditis elegans	Illumina Genome Analyzer IIx	University of Toronto	SRP060311	Gene expression in four C.elegans natural isolates	SRS978121		340.6	1	12780651	472884087		RNA-Seq	TRANSCRIPTOMIC	PolyA
SRR2086427	SRX1080514	C. elegans isolate CB4856 L4 RNA-Seq	Caenorhabditis elegans	Illumina Genome Analyzer IIx	University of Toronto	SRP060311	Gene expression in four C.elegans natural isolates	SRS978079		396.81	1	14873053	550302961		RNA-Seq	TRANSCRIPTOMIC	PolyA
SRR2086428	SRX1080515	C. elegans isolate AB1 L4 RNA-Seq	Caenorhabditis elegans	Illumina HiSeq 2000	University of Toronto	SRP060311	Gene expression in four C.elegans natural isolates	SRS978075		3307.99	1	24343892	4917466184		RNA-Seq	TRANSCRIPTOMIC	PolyA
SRR2086430	SRX1080516	C. elegans isolate ED3040 L4 RNA-Seq	Caenorhabditis elegans	Illumina HiSeq 2000	University of Toronto	SRP060311	Gene expression in four C.elegans natural isolates	SRS978076		4067.86	1	30312849	6123195498		RNA-Seq	TRANSCRIPTOMIC	PolyA
SRR2104395	SRX1098674	Illumina sequencing of the Caenorhbditis elegans transcriptome using RNA isolated from L4 stage	Caenorhabditis elegans	Illumina HiSeq 2000	Seoul National University	SRP060554	Caenorhabditis elegans ALT transcriptome	SRS985575		2115.31	1	16147174	3261729148	mRNA of CS1	RNA-Seq	TRANSCRIPTOMIC	cDNA
SRR2104396	SRX1098675	Illumina sequencing of the Caenorhbditis elegans transcriptome using RNA isolated from L4 stage	Caenorhabditis elegans	Illumina HiSeq 2000	Seoul National University	SRP060554	Caenorhabditis elegans ALT transcriptome	SRS993305		1826.99	1	13948832	2817664064	mRNA of CS2	RNA-Seq	TRANSCRIPTOMIC	cDNA
SRR2104397	SRX1098676	Illumina sequencing of the Caenorhbditis elegans transcriptome using RNA isolated from L4 stage	Caenorhabditis elegans	Illumina HiSeq 2000	Seoul National University	SRP060554	Caenorhabditis elegans ALT transcriptome	SRS993306		2005.97	1	15306394	3091891588	mRNA of NS1	RNA-Seq	TRANSCRIPTOMIC	cDNA
SRR2104398	SRX1098677	Illumina sequencing of the Caenorhbditis elegans transcriptome using RNA isolated from L4 stage	Caenorhabditis elegans	Illumina HiSeq 2000	Seoul National University	SRP060554	Caenorhabditis elegans ALT transcriptome	SRS993307		1834.63	1	13913910	2810609820	mRNA of NS2	RNA-Seq	TRANSCRIPTOMIC	cDNA
SRR389297	SRX111399	GSM847429: wild type, 52 h, untreated	Caenorhabditis elegans	Illumina HiSeq 2000	GEO	SRP009829	Analysis of 3' 2'-O-methylated small RNAs in Caenorhabditis elegans	SRS282418		622.28	1	22563476	902539040	GSM847429: wild type, 52 h, untreated	RNA-Seq	TRANSCRIPTOMIC	other
SRR389298	SRX111400	GSM847430: wild type, 68 h, untreated	Caenorhabditis elegans	Illumina HiSeq 2000	GEO	SRP009829	Analysis of 3' 2'-O-methylated small RNAs in Caenorhabditis elegans	SRS282419		627.44	1	22753891	910155640	GSM847430: wild type, 68 h, untreated	RNA-Seq	TRANSCRIPTOMIC	other
SRR389299	SRX111401	GSM847431: wild type, 52 h, beta eliminated	Caenorhabditis elegans	Illumina HiSeq 2000	GEO	SRP009829	Analysis of 3' 2'-O-methylated small RNAs in Caenorhabditis elegans	SRS282420		434.19	1	17301393	692055720	GSM847431: wild type, 52 h, beta eliminated	RNA-Seq	TRANSCRIPTOMIC	other
SRR2142254	SRX1130124	C. elegans whole worm (control sample)	Caenorhabditis elegans	Illumina HiSeq 2000	MPI for Developmental Biology	SRP061927	Caenorhabditis elegans intestinal transcriptome	SRS993307	49743412	10048169224	cel_adults	RNA-Seq	TRANSCRIPTOMIC	unspecified
SRR2142255	SRX1130126	Transcriptome of Caenorhabditis elegans intestine	Caenorhabditis elegans	Illumina HiSeq 2000	MPI for Developmental Biology	SRP061927	Caenorhabditis elegans intestinal transcriptome	SRS993307		5007.79	1	38836876	7845048952	cel_intestine	RNA-Seq	TRANSCRIPTOMIC	unspecified
SRR400287	SRX116361	C. elegans L1 stage mRNAseq	Caenorhabditis elegans	Illumina Genome Analyzer IIx	Stanford University	SRP010374	Wobble Base-pairing Slows in vivo Translation Elongation in Metazoans	SRS287333	14163319	509879484	AF_MS_11	RNA-Seq	TRANSCRIPTOMIC	RANDOM
SRR400289	SRX116363	C. elegans L1 mRNAseq	Caenorhabditis elegans	Illumina Genome Analyzer IIx	Stanford University	SRP010374	Wobble Base-pairing Slows in vivo Translation Elongation in Metazoans	SRS287333	13029793	469072548	AF_MS_20	RNA-Seq	TRANSCRIPTOMIC	RANDOM
SRR2185654	SRX1165475	GSM1862268: N2 wild-type rep 1; Caenorhabditis elegans; RNA-Seq	Caenorhabditis elegans	Illumina HiSeq 2000	GEO	SRP062881	daf-16/FoxO isoform-specific deletion mutants	SRS1045998	57999404	11715879608		RNA-Seq	TRANSCRIPTOMIC	cDNA
SRR2185655	SRX1165476	GSM1862269: N2 wild-type rep 2; Caenorhabditis elegans; RNA-Seq	Caenorhabditis elegans	Illumina HiSeq 2000	GEO	SRP062881	daf-16/FoxO isoform-specific deletion mutants	SRS1045997	40607164	8202647128		RNA-Seq	TRANSCRIPTOMIC	cDNA
SRR2185656	SRX1165477	GSM1862270: N2 wild-type rep 3; Caenorhabditis elegans; RNA-Seq	Caenorhabditis elegans	Illumina HiSeq 2000	GEO	SRP062881	daf-16/FoxO isoform-specific deletion mutants	SRS1045996	49090847	9916351094		RNA-Seq	TRANSCRIPTOMIC	cDNA
SRR2185657	SRX1165478	GSM1862271: daf-2(e1370) rep 1; Caenorhabditis elegans; RNA-Seq	Caenorhabditis elegans	Illumina HiSeq 2000	GEO	SRP062881	daf-16/FoxO isoform-specific deletion mutants	SRS1045995		5278.27	1	43990735	8886128470		RNA-Seq	TRANSCRIPTOMIC	cDNA
SRR2185658	SRX1165479	GSM1862272: daf-2(e1370) rep 2; Caenorhabditis elegans; RNA-Seq	Caenorhabditis elegans	Illumina HiSeq 2000	GEO	SRP062881	daf-16/FoxO isoform-specific deletion mutants	SRS1045994		4497.86	1	37593429	7593872658		RNA-Seq	TRANSCRIPTOMIC	cDNA
SRR2185659	SRX1165480	GSM1862273: daf-2(e1370) rep 3; Caenorhabditis elegans; RNA-Seq	Caenorhabditis elegans	Illumina HiSeq 2000	GEO	SRP062881	daf-16/FoxO isoform-specific deletion mutants	SRS1045993		4890.08	1	40730514	8227563828		RNA-Seq	TRANSCRIPTOMIC	cDNA
SRR2185660	SRX1165481	GSM1862274: daf-16(mu86);daf-2(e1370) rep 1; Caenorhabditis elegans; RNA-Seq	Caenorhabditis elegans	Illumina HiSeq 2000	GEO	SRP062881	daf-16/FoxO isoform-specific deletion mutants	SRS1045992		5916.39	1	49349324	9968563448		RNA-Seq	TRANSCRIPTOMIC	cDNA
SRR2185661	SRX1165482	GSM1862275: daf-16(mu86);daf-2(e1370) rep 2; Caenorhabditis elegans; RNA-Seq	Caenorhabditis elegans	Illumina HiSeq 2000	GEO	SRP062881	daf-16/FoxO isoform-specific deletion mutants	SRS1045991		5654.9	1	47066389	9507410578		RNA-Seq	TRANSCRIPTOMIC	cDNA
SRR2185662	SRX1165483	GSM1862276: daf-16(mu86);daf-2(e1370) rep 3; Caenorhabditis elegans; RNA-Seq	Caenorhabditis elegans	Illumina HiSeq 2000	GEO	SRP062881	daf-16/FoxO isoform-specific deletion mutants	SRS1045990		4525.39	1	37660281	7607376762		RNA-Seq	TRANSCRIPTOMIC	cDNA
SRR2185663	SRX1165484	GSM1862277: daf-16(mg54);daf-2(e1370) rep 1; Caenorhabditis elegans; RNA-Seq	Caenorhabditis elegans	Illumina HiSeq 2000	GEO	SRP062881	daf-16/FoxO isoform-specific deletion mutants	SRS1045989		4669.01	1	38830218	7843704036		RNA-Seq	TRANSCRIPTOMIC	cDNA
SRR2185664	SRX1165485	GSM1862278: daf-16(mg54);daf-2(e1370) rep 2; Caenorhabditis elegans; RNA-Seq	Caenorhabditis elegans	Illumina HiSeq 2000	GEO	SRP062881	daf-16/FoxO isoform-specific deletion mutants	SRS1045988		4459.85	1	37177623	7509879846		RNA-Seq	TRANSCRIPTOMIC	cDNA
SRR2185665	SRX1165486	GSM1862279: daf-16(mg54);daf-2(e1370) rep 3; Caenorhabditis elegans; RNA-Seq	Caenorhabditis elegans	Illumina HiSeq 2000	GEO	SRP062881	daf-16/FoxO isoform-specific deletion mutants	SRS1045987		5284.01	1	44012793	8890584186		RNA-Seq	TRANSCRIPTOMIC	cDNA
SRR2185666	SRX1165487	GSM1862280: daf-16(tm5030);daf-2(e1370) rep 1; Caenorhabditis elegans; RNA-Seq	Caenorhabditis elegans	Illumina HiSeq 2000	GEO	SRP062881	daf-16/FoxO isoform-specific deletion mutants	SRS1045986		5388.21	1	44930736	9076008672		RNA-Seq	TRANSCRIPTOMIC	cDNA
SRR2185667	SRX1165488	GSM1862281: daf-16(tm5030);daf-2(e1370) rep 2; Caenorhabditis elegans; RNA-Seq	Caenorhabditis elegans	Illumina HiSeq 2000	GEO	SRP062881	daf-16/FoxO isoform-specific deletion mutants	SRS1045985		5513.31	1	45738402	9239157204		RNA-Seq	TRANSCRIPTOMIC	cDNA
SRR2185668	SRX1165489	GSM1862282: daf-16(tm5030);daf-2(e1370) rep 3; Caenorhabditis elegans; RNA-Seq	Caenorhabditis elegans	Illumina HiSeq 2000	GEO	SRP062881	daf-16/FoxO isoform-specific deletion mutants	SRS1045984		5426.2	1	44785529	9046676858		RNA-Seq	TRANSCRIPTOMIC	cDNA
SRR2185669	SRX1165490	GSM1862283: daf-16(tm5032);daf-2(e1370) rep 1; Caenorhabditis elegans; RNA-Seq	Caenorhabditis elegans	Illumina HiSeq 2000	GEO	SRP062881	daf-16/FoxO isoform-specific deletion mutants	SRS1045983		6617.44	1	55212586	11152942372		RNA-Seq	TRANSCRIPTOMIC	cDNA
SRR2185670	SRX1165491	GSM1862284: daf-16(tm5032);daf-2(e1370) rep 2; Caenorhabditis elegans; RNA-Seq	Caenorhabditis elegans	Illumina HiSeq 2000	GEO	SRP062881	daf-16/FoxO isoform-specific deletion mutants	SRS1045982		5217.96	1	43496211	8786234622		RNA-Seq	TRANSCRIPTOMIC	cDNA
SRR2185671	SRX1165492	GSM1862285: daf-16(tm5032);daf-2(e1370) rep 3; Caenorhabditis elegans; RNA-Seq	Caenorhabditis elegans	Illumina HiSeq 2000	GEO	SRP062881	daf-16/FoxO isoform-specific deletion mutants	SRS1045981		5865.63	1	48640150	9825310300		RNA-Seq	TRANSCRIPTOMIC	cDNA
SRR2185672	SRX1165493	GSM1862286: daf-16(tm6659);daf-2(e1370) rep 1; Caenorhabditis elegans; RNA-Seq	Caenorhabditis elegans	Illumina HiSeq 2000	GEO	SRP062881	daf-16/FoxO isoform-specific deletion mutants	SRS1045980		6244.26	1	52210533	10546527666		RNA-Seq	TRANSCRIPTOMIC	cDNA
SRR2185673	SRX1165494	GSM1862287: daf-16(tm6659);daf-2(e1370) rep 2; Caenorhabditis elegans; RNA-Seq	Caenorhabditis elegans	Illumina HiSeq 2000	GEO	SRP062881	daf-16/FoxO isoform-specific deletion mutants	SRS1045979		5794.98	1	47968711	9689679622		RNA-Seq	TRANSCRIPTOMIC	cDNA
SRR2185674	SRX1165495	GSM1862288: daf-16(tm6659);daf-2(e1370) rep 3; Caenorhabditis elegans; RNA-Seq	Caenorhabditis elegans	Illumina HiSeq 2000	GEO	SRP062881	daf-16/FoxO isoform-specific deletion mutants	SRS1045978		4975.08	1	41452404	8373385608		RNA-Seq	TRANSCRIPTOMIC	cDNA
SRR403052	SRX118110	RNA-Seq of poly(A) RNA from adr-1;adr-2 embryos	Caenorhabditis elegans	Illumina Genome Analyzer IIx	Stanford University	SRP010646	Caenorhabditis elegans strain:N2, adr-1, adr-2, adr-1;adr-2 Transcriptome or Gene expression	SRS290491		385.04	1	22213593	733041755	BB4-E-mRNA	RNA-Seq	TRANSCRIPTOMIC	cDNA
SRR403053	SRX118111	RNA-Seq of poly(A) RNA from adr-1;adr-2 L4 larvae	Caenorhabditis elegans	Illumina Genome Analyzer IIx	Stanford University	SRP010646	Caenorhabditis elegans strain:N2, adr-1, adr-2, adr-1;adr-2 Transcriptome or Gene expression	SRS290492		216.52	1	16895246	557429357	BB4-L4-mRNA	RNA-Seq	TRANSCRIPTOMIC	cDNA
SRR403054	SRX118112	RNA-Seq of poly(A) RNA from N2 embryos	Caenorhabditis elegans	Illumina Genome Analyzer IIx	Stanford University	SRP010646	Caenorhabditis elegans strain:N2, adr-1, adr-2, adr-1;adr-2 Transcriptome or Gene expression	SRS290493	20765650	685207885	N2-E-mRNA	RNA-Seq	TRANSCRIPTOMIC	cDNA
SRR403055	SRX118113	RNA-Seq of poly(A) RNA from N2 L4 larvae	Caenorhabditis elegans	Illumina Genome Analyzer IIx	Stanford University	SRP010646	Caenorhabditis elegans strain:N2, adr-1, adr-2, adr-1;adr-2 Transcriptome or Gene expression	SRS290494	24431614	806240094	N2-L4-mRNA	RNA-Seq	TRANSCRIPTOMIC	cDNA
SRR405088	SRX118116	C. elegans L1 mRNAseq	Caenorhabditis elegans	Illumina Genome Analyzer IIx	Stanford University	SRP010374	Wobble Base-pairing Slows in vivo Translation Elongation in Metazoans	SRS287333	13029793	469072548	MS_20	RNA-Seq	TRANSCRIPTOMIC	RANDOM
SRR405089	SRX118117	C. elegans L1 ribosome footprints	Caenorhabditis elegans	Illumina Genome Analyzer IIx	Stanford University	SRP010374	Wobble Base-pairing Slows in vivo Translation Elongation in Metazoans	SRS287333	13627738	490598568	MS_16	RNA-Seq	TRANSCRIPTOMIC	other
SRR405091 SRR405092	SRX118118	C. elegans L1 ribosome footprints	Caenorhabditis elegans	Illumina Genome Analyzer IIx	Stanford University	SRP010374	Wobble Base-pairing Slows in vivo Translation Elongation in Metazoans	SRS287333	28252050	1017073800	MS_16	RNA-Seq	TRANSCRIPTOMIC	other
SRR405093	SRX118119	C. elegans L2 mRNAseq biological replicate 1	Caenorhabditis elegans	Illumina Genome Analyzer IIx	Stanford University	SRP010374	Wobble Base-pairing Slows in vivo Translation Elongation in Metazoans	SRS290749	13924082	501266952	MS_12	RNA-Seq	TRANSCRIPTOMIC	RANDOM
SRR407625	SRX118120	C. elegans L2 mRNAseq biological replicate 2	Caenorhabditis elegans	Illumina Genome Analyzer IIx	Stanford University	SRP010374	Wobble Base-pairing Slows in vivo Translation Elongation in Metazoans	SRS290749	10129441	364659876	MS_21	RNA-Seq	TRANSCRIPTOMIC	RANDOM
SRR407626	SRX118124	C. elegans L3 mRNAseq biological replicate 2	Caenorhabditis elegans	Illumina Genome Analyzer IIx	Stanford University	SRP010374	Wobble Base-pairing Slows in vivo Translation Elongation in Metazoans	SRS290750	15278640	550031040	MS_22	RNA-Seq	TRANSCRIPTOMIC	RANDOM
SRR405094	SRX118125	C. elegans L3 mRNAseq biological replicate 1	Caenorhabditis elegans	Illumina Genome Analyzer IIx	Stanford University	SRP010374	Wobble Base-pairing Slows in vivo Translation Elongation in Metazoans	SRS290750	14104707	507769452	MS_13	RNA-Seq	TRANSCRIPTOMIC	RANDOM
SRR407628	SRX118126	C. elegans L4 mRNAseq biological replicate 1	Caenorhabditis elegans	Illumina Genome Analyzer IIx	Stanford University	SRP010374	Wobble Base-pairing Slows in vivo Translation Elongation in Metazoans	SRS290751	15112875	544063500	MS_23	RNA-Seq	TRANSCRIPTOMIC	RANDOM
SRR407645	SRX118127	C. elegans L4 ribosome footprints biological replicate 1	Caenorhabditis elegans	Illumina Genome Analyzer IIx	Stanford University	SRP010374	Wobble Base-pairing Slows in vivo Translation Elongation in Metazoans	SRS290751	12639508	455022288	MS_15	RNA-Seq	TRANSCRIPTOMIC	other
SRR407624	SRX118128	L3 ribosome footprints biological replicate 1	Caenorhabditis elegans	Illumina Genome Analyzer IIx	Stanford University	SRP010374	Wobble Base-pairing Slows in vivo Translation Elongation in Metazoans	SRS290750	12423243	447236748	MS_17	RNA-Seq	TRANSCRIPTOMIC	other
SRR407629 SRR407631	SRX118139	L3 ribosome footprints biological replicate 2	Caenorhabditis elegans	Illumina Genome Analyzer IIx	Stanford University	SRP010374	Wobble Base-pairing Slows in vivo Translation Elongation in Metazoans	SRS290750	25602272	921681792	MS_26	RNA-Seq	TRANSCRIPTOMIC	other
SRR407630 SRR407632	SRX118140	L4 ribosome footprints biological replicate 2	Caenorhabditis elegans	Illumina Genome Analyzer IIx	Stanford University	SRP010374	Wobble Base-pairing Slows in vivo Translation Elongation in Metazoans	SRS290751	28358048	1020889728	MS_27	RNA-Seq	TRANSCRIPTOMIC	other
SRR407633	SRX118143	L3 ribosome footprints prepared without cycloheximide, technical replicate 1	Caenorhabditis elegans	Illumina Genome Analyzer IIx	Stanford University	SRP010374	Wobble Base-pairing Slows in vivo Translation Elongation in Metazoans	SRS290750	28758234	1035296424	MS_44	RNA-Seq	TRANSCRIPTOMIC	other
SRR407634	SRX118144	L3 ribosome footprints prepared without cycloheximide, technical replicate 2	Caenorhabditis elegans	Illumina Genome Analyzer IIx	Stanford University	SRP010374	Wobble Base-pairing Slows in vivo Translation Elongation in Metazoans	SRS290750	32687503	1176750108	MS_45	RNA-Seq	TRANSCRIPTOMIC	other
SRR413510 SRR413511	SRX121891	GSM879792: Endogenous mRNA from N2 var. Bristol (wildtype) 1; Caenorhabditis elegans; RNA-Seq	Caenorhabditis elegans	Illumina Genome Analyzer IIx	GEO	SRP011038	Impaired Insulin-/IGF1-Signaling Extends Life Span by Promoting Mitochondrial L-Proline Catabolism to Induce a Transient ROS-Signal	SRS295110	48724550	3703065800	GSM879792: Endogenous mRNA from N2 var. Bristol (wildtype) 1	RNA-Seq	TRANSCRIPTOMIC	cDNA
SRR413512 SRR413513	SRX121892	GSM879793: Endogenous mRNA from daf-2(e1370) mutant 1; Caenorhabditis elegans; RNA-Seq	Caenorhabditis elegans	Illumina Genome Analyzer IIx	GEO	SRP011038	Impaired Insulin-/IGF1-Signaling Extends Life Span by Promoting Mitochondrial L-Proline Catabolism to Induce a Transient ROS-Signal	SRS295111		2376.77	2	47483451	3608742276	GSM879793: Endogenous mRNA from daf-2(e1370) mutant 1	RNA-Seq	TRANSCRIPTOMIC	cDNA
SRR413514 SRR413515	SRX121893	GSM879794: Endogenous mRNA from N2 var. Bristol (wildtype) 2; Caenorhabditis elegans; RNA-Seq	Caenorhabditis elegans	Illumina Genome Analyzer IIx	GEO	SRP011038	Impaired Insulin-/IGF1-Signaling Extends Life Span by Promoting Mitochondrial L-Proline Catabolism to Induce a Transient ROS-Signal	SRS295112	48396904	3678164704	GSM879794: Endogenous mRNA from N2 var. Bristol (wildtype) 2	RNA-Seq	TRANSCRIPTOMIC	cDNA
SRR413516 SRR413517	SRX121894	GSM879795: Endogenous mRNA from daf-2(e1370) mutant 2; Caenorhabditis elegans; RNA-Seq	Caenorhabditis elegans	Illumina Genome Analyzer IIx	GEO	SRP011038	Impaired Insulin-/IGF1-Signaling Extends Life Span by Promoting Mitochondrial L-Proline Catabolism to Induce a Transient ROS-Signal	SRS295113		2364.84	2	47469397	3607674172	GSM879795: Endogenous mRNA from daf-2(e1370) mutant 2	RNA-Seq	TRANSCRIPTOMIC	cDNA
SRR413518	SRX121895	GSM879796: Endogenous mRNA from N2 var. Bristol (wildtype) 3; Caenorhabditis elegans; RNA-Seq	Caenorhabditis elegans	Illumina Genome Analyzer IIx	GEO	SRP011038	Impaired Insulin-/IGF1-Signaling Extends Life Span by Promoting Mitochondrial L-Proline Catabolism to Induce a Transient ROS-Signal	SRS295114	37304943	2835175668	GSM879796: Endogenous mRNA from N2 var. Bristol (wildtype) 3	RNA-Seq	TRANSCRIPTOMIC	cDNA
SRR413519	SRX121896	GSM879797: Endogenous mRNA from daf-2(e1370) mutant 3; Caenorhabditis elegans; RNA-Seq	Caenorhabditis elegans	Illumina Genome Analyzer IIx	GEO	SRP011038	Impaired Insulin-/IGF1-Signaling Extends Life Span by Promoting Mitochondrial L-Proline Catabolism to Induce a Transient ROS-Signal	SRS295115		1518.4	1	35676332	2711401232	GSM879797: Endogenous mRNA from daf-2(e1370) mutant 3	RNA-Seq	TRANSCRIPTOMIC	cDNA
SRR473085	SRX139566	Illumina sequencing of C. elegans N2 larval L1 all cell library FGSR402 - DSN treated - RNAseq random fragment library 100bp PE RW0001	Caenorhabditis elegans	Illumina HiSeq 2000	UWGS-RW	SRP000401	Deep sequencing of the Caenorhabditis elegans transcriptome using RNA isolated from various developmental stages under various experimental conditions RW0001	SRS311687	18285547	3657109400	DMM402_N2all_L1-DSN	RNA-Seq	TRANSCRIPTOMIC	cDNA
SRR473086	SRX139567	Illumina sequencing of C. elegans larval L2 A motor neuron library FGSR408 - DSN treated - RNAseq random fragment library 100bp PE RW0001	Caenorhabditis elegans	Illumina HiSeq 2000	UWGS-RW	SRP000401	Deep sequencing of the Caenorhabditis elegans transcriptome using RNA isolated from various developmental stages under various experimental conditions RW0001	SRS311688		1190.41	1	8253048	1650609600	DMM408_Amot_nrn_L2-DSN	RNA-Seq	TRANSCRIPTOMIC	cDNA
SRR473299	SRX139591	Illumina sequencing of C. elegans N2 larval L1 all cell library FGSR401 - DSN treated - RNAseq random fragment library 100bp PE RW0001	Caenorhabditis elegans	Illumina HiSeq 2000	UWGS-RW	SRP000401	Deep sequencing of the Caenorhabditis elegans transcriptome using RNA isolated from various developmental stages under various experimental conditions RW0001	SRS311684	11446900	2289380000	DMM401_N2all_L1-DSN	RNA-Seq	TRANSCRIPTOMIC	cDNA
SRR473300	SRX139592	Illumina sequencing of C. elegans larval L2 A motor neuron library FGSR414 - DSN treated - RNAseq random fragment library 100bp PE RW0001	Caenorhabditis elegans	Illumina HiSeq 2000	UWGS-RW	SRP000401	Deep sequencing of the Caenorhabditis elegans transcriptome using RNA isolated from various developmental stages under various experimental conditions RW0001	SRS311689		1325.15	1	9265571	1853114200	DMM414_Amot_nrn_L2-DSN	RNA-Seq	TRANSCRIPTOMIC	cDNA
SRR474827	SRX139602	Illumina sequencing of C. elegans LX837 larval L1 NSML and NSMR neurons 100bp PE RW0001	Caenorhabditis elegans	Illumina HiSeq 2000	UWGS-RW	SRP000401	Deep sequencing of the Caenorhabditis elegans transcriptome using RNA isolated from various developmental stages under various experimental conditions RW0001	SRS308486		11612	1	88503754	17700750800	DMM386-NSML_NSMR-nrn_L1	RNA-Seq	TRANSCRIPTOMIC	cDNA
SRR474828	SRX139603	Illumina sequencing of C. elegans larval L2 A motor neuron library FGSR414 - DSN treated - RNAseq random fragment library 100bp PE RW0001	Caenorhabditis elegans	Illumina HiSeq 2000	UWGS-RW	SRP000401	Deep sequencing of the Caenorhabditis elegans transcriptome using RNA isolated from various developmental stages under various experimental conditions RW0001	SRS311690		1484.87	1	10299069	2059813800	DMM415_Amot_nrn_L2-DSN	RNA-Seq	TRANSCRIPTOMIC	cDNA
SRR493075	SRX145443	Illumina sequencing of C. elegans larval L1 all neurons library FGSR383 - total RNA - RNAseq random fragment library 77bp PE RW0001	Caenorhabditis elegans	Illumina HiSeq 2000	UWGS-RW	SRP000401	Deep sequencing of the Caenorhabditis elegans transcriptome using RNA isolated from various developmental stages under various experimental conditions RW0001	SRS311746		15519.3	1	163288190	25146381260	DMM383-all-nrn_L1-V	RNA-Seq	TRANSCRIPTOMIC	cDNA
SRR493076	SRX145444	Illumina sequencing of C. elegans N2 larval L1 all cell library FGSR401 - total RNA - RNAseq random fragment library 77bp PE RW0001	Caenorhabditis elegans	Illumina HiSeq 2000	UWGS-RW	SRP000401	Deep sequencing of the Caenorhabditis elegans transcriptome using RNA isolated from various developmental stages under various experimental conditions RW0001	SRS311747	111324511	17143974694	DMM401-N2all_L1-V	RNA-Seq	TRANSCRIPTOMIC	cDNA
SRR493077	SRX145445	Illumina sequencing of C. elegans LX837 larval L1 NSML and NSMR neurons library FGSR387 - total RNA - RNAseq random fragment library 76bp PE RW0001	Caenorhabditis elegans	Illumina HiSeq 2000	UWGS-RW	SRP000401	Deep sequencing of the Caenorhabditis elegans transcriptome using RNA isolated from various developmental stages under various experimental conditions RW0001	SRS311748		14498.4	1	141614217	21525360984	DMM387-NSML_NSMR-nrn_L1-V	RNA-Seq	TRANSCRIPTOMIC	cDNA
SRR493078	SRX145446	Illumina sequencing of C. elegans larval L1 all neurons library FGSR391 - total RNA - RNAseq random fragment library 77bp PE RW0001	Caenorhabditis elegans	Illumina HiSeq 2000	UWGS-RW	SRP000401	Deep sequencing of the Caenorhabditis elegans transcriptome using RNA isolated from various developmental stages under various experimental conditions RW0001	SRS311749		19094.7	1	193007956	29723225224	DMM391-all-nrn_L1-V	RNA-Seq	TRANSCRIPTOMIC	cDNA
SRR493079	SRX145447	Illumina sequencing of C. elegans N2 larval L1 all cell library FGSR402 - total RNA - RNAseq random fragment library 77bp PE RW0001	Caenorhabditis elegans	Illumina HiSeq 2000	UWGS-RW	SRP000401	Deep sequencing of the Caenorhabditis elegans transcriptome using RNA isolated from various developmental stages under various experimental conditions RW0001	SRS311750	191658526	29515413004	DMM402-N2all_L1-V	RNA-Seq	TRANSCRIPTOMIC	cDNA
SRR493099 SRR493100	SRX145480	Illumina sequencing of C. elegans N2 embryos hand picked at the 4 cell stage processed with Ribo-zero RNAseq random fragment library 100bp PE RW0001	Caenorhabditis elegans	Illumina HiSeq 2000	UWGS-RW	SRP000401	Deep sequencing of the Caenorhabditis elegans transcriptome using RNA isolated from various developmental stages under various experimental conditions RW0001	SRS311761	9350939	1870187800	N2_4cell_EE_RZ-56	RNA-Seq	TRANSCRIPTOMIC	cDNA
SRR493105 SRR554453	SRX145486	Illumina sequencing of C. elegans N2 early embryos treated with DSN - RNAseq random fragment library 100bp PE RW0001	Caenorhabditis elegans	Illumina HiSeq 2000	UWGS-RW	SRP000401	Deep sequencing of the Caenorhabditis elegans transcriptome using RNA isolated from various developmental stages under various experimental conditions RW0001	SRS311763	50244770	10048954000	N2_EE_DSN-51	RNA-Seq	TRANSCRIPTOMIC	cDNA
SRR493358 SRR493359 SRR493360 SRR493361	SRX145660	Illumina sequencing of C. elegans N2 early embryos treated with Ribo-zero - RNAseq random fragment library 100bp PE RW0001	Caenorhabditis elegans	Illumina HiSeq 2000	UWGS-RW	SRP000401	Deep sequencing of the Caenorhabditis elegans transcriptome using RNA isolated from various developmental stages under various experimental conditions RW0001	SRS311907	16498463	3299692600	N2_EE_RZ-54	RNA-Seq	TRANSCRIPTOMIC	cDNA
SRR493362 SRR493363 SRR493364 SRR493365	SRX145661	Illumina sequencing of C. elegans N2 larval L2 treated with Ribo-zero - RNAseq random fragment library 100bp PE RW0001	Caenorhabditis elegans	Illumina HiSeq 2000	UWGS-RW	SRP000401	Deep sequencing of the Caenorhabditis elegans transcriptome using RNA isolated from various developmental stages under various experimental conditions RW0001	SRS311908	17011537	3402307400	N2_L2_RZ-53	RNA-Seq	TRANSCRIPTOMIC	cDNA
SRR504316	SRX151597	Illumina sequencing of C. elegans N2 early embryo reference cells library FGSR260 - total RNA - DSN treated - RNAseq random fragment library 100bp PE RW0001	Caenorhabditis elegans	Illumina HiSeq 2000	UWGS-RW	SRP000401	Deep sequencing of the Caenorhabditis elegans transcriptome using RNA isolated from various developmental stages under various experimental conditions RW0001	SRS344159	17402820	3480564000	DMM260_N2ref_EE	RNA-Seq	TRANSCRIPTOMIC	cDNA
SRR504317 SRR504318	SRX151598	Illumina sequencing of C. elegans DZ685 embryonic Z1/Z4 cells library FGSR239 - total RNA - DSN treated - RNAseq random fragment library 100bp PE RW0001	Caenorhabditis elegans	Illumina HiSeq 2000	UWGS-RW	SRP000401	Deep sequencing of the Caenorhabditis elegans transcriptome using RNA isolated from various developmental stages under various experimental conditions RW0001	SRS344160		2465.67	2	17749924	3549984800	DMM239_Z1Z4_Em	RNA-Seq	TRANSCRIPTOMIC	cDNA
SRR504319	SRX151599	Illumina sequencing of C. elegans NW1229 larval L1 all neuron library FGSR383 - total RNA - DSN treated - RNAseq random fragment library 100bp PE RW0001	Caenorhabditis elegans	Illumina HiSeq 2000	UWGS-RW	SRP000401	Deep sequencing of the Caenorhabditis elegans transcriptome using RNA isolated from various developmental stages under various experimental conditions RW0001	SRS344161		1424.4	1	11363982	2272796400	DMM383_all-nrn_L1	RNA-Seq	TRANSCRIPTOMIC	cDNA
SRR504322 SRR504323	SRX151602	Illumina sequencing of C. elegans NW1229 larval L1 all neuron library FGSR381 - total RNA - DSN treated – RNAseq random fragment library 100bp PE RW0001	Caenorhabditis elegans	Illumina HiSeq 2000	UWGS-RW	SRP000401	Deep sequencing of the Caenorhabditis elegans transcriptome using RNA isolated from various developmental stages under various experimental conditions RW0001	SRS344162		6721.06	2	48972636	9794527200	DMM381_all-nrn_L1	RNA-Seq	TRANSCRIPTOMIC	cDNA
SRR504324 SRR504325	SRX151607	Illumina sequencing of C. elegans N2 larval L2 library N2_L2 DSN treated - total RNA - RNAseq random fragment library 100bp PE RW0001	Caenorhabditis elegans	Illumina HiSeq 2000	UWGS-RW	SRP000401	Deep sequencing of the Caenorhabditis elegans transcriptome using RNA isolated from various developmental stages under various experimental conditions RW0001	SRS344178	15446419	3089283800	N2_L2_DSN-50	RNA-Seq	TRANSCRIPTOMIC	cDNA
SRR504336 SRR504337	SRX151617	Illumina sequencing of C. elegans LX837 larval L1 NSM neuron library FGSR389 - total RNA - DSN treated - RNAseq random fragment library 100bp PE RW0001	Caenorhabditis elegans	Illumina HiSeq 2000	UWGS-RW	SRP000401	Deep sequencing of the Caenorhabditis elegans transcriptome using RNA isolated from various developmental stages under various experimental conditions RW0001	SRS344181		3169.09	2	22846574	4569314800	DMM389_NSM_L1	RNA-Seq	TRANSCRIPTOMIC	cDNA
SRR504338 SRR504339	SRX151618	Illumina sequencing of C. elegans N2 adult gonad Ad_gonad-1 ribozero low input treated - total RNA - RNAseq random fragment library 100bp PE RW0001	Caenorhabditis elegans	Illumina HiSeq 2000	UWGS-RW	SRP000401	Deep sequencing of the Caenorhabditis elegans transcriptome using RNA isolated from various developmental stages under various experimental conditions RW0001	SRS344182	8056413	1611282600	N2_Ad_gonad-1-RZLI	RNA-Seq	TRANSCRIPTOMIC	cDNA
SRR522009	SRX160147	L1 mRNA-seq replicate 1	Caenorhabditis elegans	Illumina HiSeq 2000	Stanford University	SRP014427	Caenorhabditis elegans ribosome profiling of miRNA targets	SRS350385		492.55	1	14429547	721477350	Celeg_FED_1_mRNA	RNA-Seq	TRANSCRIPTOMIC	unspecified
SRR522010	SRX160148	L1 replicate 2 mRNA-seq	Caenorhabditis elegans	Illumina HiSeq 2000	Stanford University	SRP014427	Caenorhabditis elegans ribosome profiling of miRNA targets	SRS350385		517.29	1	15243931	762196550	Celeg_2_FED_mRNA	RNA-Seq	TRANSCRIPTOMIC	unspecified
SRR522011	SRX160149	L1 replicate 3 mRNA-seq	Caenorhabditis elegans	Illumina HiSeq 2000	Stanford University	SRP014427	Caenorhabditis elegans ribosome profiling of miRNA targets	SRS350385		901.35	1	27043901	1352195050	Celeg_3_FED_mRNA	RNA-Seq	TRANSCRIPTOMIC	unspecified
SRR522888	SRX160157	L1 mRNA-seq replicate 4	Caenorhabditis elegans	Illumina HiSeq 2000	Stanford University	SRP014427	Caenorhabditis elegans ribosome profiling of miRNA targets	SRS350385		4045.08	1	97881671	5677136918	MS_59	RNA-Seq	TRANSCRIPTOMIC	unspecified
SRR522882	SRX160290	L4 mRNA-seq replicate 1	Caenorhabditis elegans	Illumina HiSeq 2000	Stanford University	SRP014427	Caenorhabditis elegans ribosome profiling of miRNA targets	SRS350385		7283.74	1	184752725	10715658050	MS_60	RNA-Seq	TRANSCRIPTOMIC	unspecified
SRR522151	SRX160291	L4 mRNA-seq replicate 2	Caenorhabditis elegans	Illumina Genome Analyzer IIx	Stanford University	SRP014427	Caenorhabditis elegans ribosome profiling of miRNA targets	SRS350385		521.34	1	27313086	983271096	MS-56	RNA-Seq	TRANSCRIPTOMIC	unspecified
SRR522152	SRX160292	L1 total RNA-seq	Caenorhabditis elegans	Illumina Genome Analyzer IIx	Stanford University	SRP014427	Caenorhabditis elegans ribosome profiling of miRNA targets	SRS350385		684.11	1	33245137	1196824932	MS-57	RNA-Seq	TRANSCRIPTOMIC	unspecified
SRR522153	SRX160293	L4 total RNA-seq	Caenorhabditis elegans	Illumina Genome Analyzer IIx	Stanford University	SRP014427	Caenorhabditis elegans ribosome profiling of miRNA targets	SRS350385		1083.44	1	58539675	2107428300	MS-32	RNA-Seq	TRANSCRIPTOMIC	unspecified
SRR522881	SRX160510	L2 ribosome footprints replicate 1	Caenorhabditis elegans	Illumina Genome Analyzer IIx	Stanford University	SRP014427	Caenorhabditis elegans ribosome profiling of miRNA targets	SRS350385		284.78	1	15787042	568333512	MS_25	RNA-Seq	TRANSCRIPTOMIC	unspecified
SRR522890	SRX160511	L2 ribosome footprints replicate 2	Caenorhabditis elegans	Illumina Genome Analyzer IIx	Stanford University	SRP014427	Caenorhabditis elegans ribosome profiling of miRNA targets	SRS350385		243.2	1	13600895	489632220	MS-29	RNA-Seq	TRANSCRIPTOMIC	unspecified
SRR522892	SRX160512	L2 ribosome footprints replicate 3	Caenorhabditis elegans	Illumina Genome Analyzer IIx	Stanford University	SRP014427	Caenorhabditis elegans ribosome profiling of miRNA targets	SRS350385		642.99	1	32939763	1185831468	MS-58	RNA-Seq	TRANSCRIPTOMIC	unspecified
SRR522895	SRX160513	L2 ribosome footprints replicate 2 (seq-replicate)	Caenorhabditis elegans	Illumina HiSeq 2000	Stanford University	SRP014427	Caenorhabditis elegans ribosome profiling of miRNA targets	SRS350385		5830.76	1	160368455	9301370390	MS-65	RNA-Seq	TRANSCRIPTOMIC	unspecified
SRR522871	SRX160514	L1 ribosome footprints replicate 1	Caenorhabditis elegans	Illumina HiSeq 2000	Stanford University	SRP014427	Caenorhabditis elegans ribosome profiling of miRNA targets	SRS350385		1032.12	1	30099263	1504963150	Celeg_1_FED_RPF	RNA-Seq	TRANSCRIPTOMIC	unspecified
SRR522872	SRX160515	L1 ribosome footprints replicate 2	Caenorhabditis elegans	Illumina HiSeq 2000	Stanford University	SRP014427	Caenorhabditis elegans ribosome profiling of miRNA targets	SRS350385		1999.76	1	59233837	2961691850	Celeg_2_FED_RPF	RNA-Seq	TRANSCRIPTOMIC	unspecified
SRR522896	SRX160516	L1 ribosome footprints replicate 3	Caenorhabditis elegans	Illumina HiSeq 2000	Stanford University	SRP014427	Caenorhabditis elegans ribosome profiling of miRNA targets	SRS350385		426.79	1	20213950	727702200	Celeg_3_FED_RPF	RNA-Seq	TRANSCRIPTOMIC	unspecified
SRR522897	SRX160517	L1 ribosome footprints replicate 4	Caenorhabditis elegans	Illumina HiSeq 2000	Stanford University	SRP014427	Caenorhabditis elegans ribosome profiling of miRNA targets	SRS350385		6776.28	1	172256552	9990880016	MS-63	RNA-Seq	TRANSCRIPTOMIC	unspecified
SRR522883	SRX160518	L4 ribosome footprints replicate 1	Caenorhabditis elegans	Illumina HiSeq 2000	Stanford University	SRP014427	Caenorhabditis elegans ribosome profiling of miRNA targets	SRS350385		6886.08	1	174693758	10132237964	MS-61	RNA-Seq	TRANSCRIPTOMIC	unspecified
SRR525286	SRX170367	GSM971870: control RNAi rep1; Caenorhabditis elegans; RNA-Seq	Caenorhabditis elegans	Illumina HiSeq 2000	GEO	SRP014544	RNA-seq quantification of expression changes upon unc-62 knockdown in adult Caenorhabditis elegans.	SRS351530	25151384	905449824	GSM971870: control RNAi rep1	RNA-Seq	TRANSCRIPTOMIC	cDNA
SRR525287	SRX170368	GSM971871: control RNAi rep2; Caenorhabditis elegans; RNA-Seq	Caenorhabditis elegans	Illumina HiSeq 2000	GEO	SRP014544	RNA-seq quantification of expression changes upon unc-62 knockdown in adult Caenorhabditis elegans.	SRS351531	26152525	941490900	GSM971871: control RNAi rep2	RNA-Seq	TRANSCRIPTOMIC	cDNA
SRR525288	SRX170369	GSM971872: control RNAi rep3; Caenorhabditis elegans; RNA-Seq	Caenorhabditis elegans	Illumina HiSeq 2000	GEO	SRP014544	RNA-seq quantification of expression changes upon unc-62 knockdown in adult Caenorhabditis elegans.	SRS351532	32009389	1152338004	GSM971872: control RNAi rep3	RNA-Seq	TRANSCRIPTOMIC	cDNA
SRR525289	SRX170370	GSM971873: unc-62 RNAi rep1; Caenorhabditis elegans; RNA-Seq	Caenorhabditis elegans	Illumina HiSeq 2000	GEO	SRP014544	RNA-seq quantification of expression changes upon unc-62 knockdown in adult Caenorhabditis elegans.	SRS351533		698.07	1	30998574	1115948664	GSM971873: unc-62 RNAi rep1	RNA-Seq	TRANSCRIPTOMIC	cDNA
SRR525290	SRX170371	GSM971874: unc-62 RNAi rep2; Caenorhabditis elegans; RNA-Seq	Caenorhabditis elegans	Illumina HiSeq 2000	GEO	SRP014544	RNA-seq quantification of expression changes upon unc-62 knockdown in adult Caenorhabditis elegans.	SRS351534		793.63	1	34319360	1235496960	GSM971874: unc-62 RNAi rep2	RNA-Seq	TRANSCRIPTOMIC	cDNA
SRR525291	SRX170372	GSM971875: unc-62 RNAi rep3; Caenorhabditis elegans; RNA-Seq	Caenorhabditis elegans	Illumina HiSeq 2000	GEO	SRP014544	RNA-seq quantification of expression changes upon unc-62 knockdown in adult Caenorhabditis elegans.	SRS351535		569.46	1	24797309	892703124	GSM971875: unc-62 RNAi rep3	RNA-Seq	TRANSCRIPTOMIC	cDNA
SRR567580	SRX172981	Illumina HiSeq 2000 sequencing of C. elegans AB and P1 blastomeres, set 1	Caenorhabditis elegans	Illumina HiSeq 2000	Technion	SRP014672	CEL-Seq transcriptomic analysis of C. elegans blastomeres	SRS352942		5663.89	1	133549619	8680725235		RNA-Seq	TRANSCRIPTOMIC	cDNA
SRR548309	SRX181515	GSM995390: 155 bp library; Caenorhabditis elegans; RNA-Seq	Caenorhabditis elegans	Illumina Genome Analyzer IIx	GEO	SRP015332	Multiple insert size paired-end sequencing for deconvolution of complex transcriptomes	SRS360106		2516.97	1	24364676	3703430752	GSM995390: 155 bp library	RNA-Seq	TRANSCRIPTOMIC	cDNA
SRR548310	SRX181516	GSM995391: 320 bp library; Caenorhabditis elegans; RNA-Seq	Caenorhabditis elegans	Illumina Genome Analyzer IIx	GEO	SRP015332	Multiple insert size paired-end sequencing for deconvolution of complex transcriptomes	SRS360107		2745.57	1	26040051	3958087752	GSM995391: 320 bp library	RNA-Seq	TRANSCRIPTOMIC	cDNA
SRR548311	SRX181517	GSM995392: 480 bp library; Caenorhabditis elegans; RNA-Seq	Caenorhabditis elegans	Illumina Genome Analyzer IIx	GEO	SRP015332	Multiple insert size paired-end sequencing for deconvolution of complex transcriptomes	SRS360108		2408.1	1	32472553	5195608480	GSM995392: 480 bp library	RNA-Seq	TRANSCRIPTOMIC	cDNA
SRR548312	SRX181518	GSM995393: 595 bp library; Caenorhabditis elegans; RNA-Seq	Caenorhabditis elegans	Illumina Genome Analyzer IIx	GEO	SRP015332	Multiple insert size paired-end sequencing for deconvolution of complex transcriptomes	SRS360109		1743.65	1	23760240	3801638400	GSM995393: 595 bp library	RNA-Seq	TRANSCRIPTOMIC	cDNA
SRR566365	SRX185637	Pool no. 1, Caenorhabditis elegans mixed-stage wild-type N2 larvae, RT-PCR	Caenorhabditis elegans	Illumina Genome Analyzer II	Cal. Inst. of Tech., Division of Biology	SRP015688	C. elegans linker cell transcriptome	SRS361800	16155370	613904060		RNA-Seq	TRANSCRIPTOMIC	RT-PCR
SRR566366	SRX185638	Pool of RT-PCRs from five individually dissected and RT-PCRed Caenorhabditis elegans linker cells, fourth larval stage (L4), nhr-67(RNAi)	Caenorhabditis elegans	Illumina Genome Analyzer II	Cal. Inst. of Tech., Division of Biology	SRP015688	C. elegans linker cell transcriptome	SRS361801		345.29	1	13571986	515735468		RNA-Seq	TRANSCRIPTOMIC	RT-PCR
SRR566367	SRX185639	Pool no. 2, Caenorhabditis elegans mixed-stage wild-type N2 larvae, RT-PCR	Caenorhabditis elegans	Illumina Genome Analyzer II	Cal. Inst. of Tech., Division of Biology	SRP015688	C. elegans linker cell transcriptome	SRS361805	10112911	384290618		RNA-Seq	TRANSCRIPTOMIC	RT-PCR
SRR566368 SRR566369	SRX185660	Pool of RT-PCRs from five individually dissected and RT-PCRed Caenorhabditis elegans linker cells, third larval stage (L3)	Caenorhabditis elegans	Illumina Genome Analyzer II	Cal. Inst. of Tech., Division of Biology	SRP015688	C. elegans linker cell transcriptome	SRS361806		340.74	2	14291807	543088666		RNA-Seq	TRANSCRIPTOMIC	RT-PCR
SRR566370	SRX185661	Pool of RT-PCRs from five individually dissected and RT-PCRed Caenorhabditis elegans linker cells, fourth larval stage (L4)	Caenorhabditis elegans	Illumina Genome Analyzer II	Cal. Inst. of Tech., Division of Biology	SRP015688	C. elegans linker cell transcriptome	SRS361807		259.42	1	10303633	391538054		RNA-Seq	TRANSCRIPTOMIC	RT-PCR
SRR566371	SRX185662	RT-PCR from one individually dissected and RT-PCRed Caenorhabditis elegans linker cell, fourth larval stage (L4), nhr-67(RNAi), number 1	Caenorhabditis elegans	Illumina HiSeq 2000	Cal. Inst. of Tech., Division of Biology	SRP015688	C. elegans linker cell transcriptome	SRS361808		520.92	1	18618538	930926900		RNA-Seq	TRANSCRIPTOMIC	RT-PCR
SRR566372	SRX185663	RT-PCR from one individually dissected and RT-PCRed Caenorhabditis elegans linker cell, fourth larval stage (L4), nhr-67(RNAi), number 2	Caenorhabditis elegans	Illumina HiSeq 2000	Cal. Inst. of Tech., Division of Biology	SRP015688	C. elegans linker cell transcriptome	SRS361809		573.32	1	20278259	1013912950		RNA-Seq	TRANSCRIPTOMIC	RT-PCR
SRR566373	SRX185664	RT-PCR from one individually dissected and RT-PCRed Caenorhabditis elegans linker cell, fourth larval stage (L4), nhr-67(RNAi), number 3	Caenorhabditis elegans	Illumina HiSeq 2000	Cal. Inst. of Tech., Division of Biology	SRP015688	C. elegans linker cell transcriptome	SRS361810		450.78	1	16008861	800443050		RNA-Seq	TRANSCRIPTOMIC	RT-PCR
SRR566374	SRX185665	RT-PCR from one individually dissected and RT-PCRed Caenorhabditis elegans linker cell, fourth larval stage (L4), nhr-67(RNAi), number 4	Caenorhabditis elegans	Illumina HiSeq 2000	Cal. Inst. of Tech., Division of Biology	SRP015688	C. elegans linker cell transcriptome	SRS361811		208.68	1	7945068	397253400		RNA-Seq	TRANSCRIPTOMIC	RT-PCR
SRR566375	SRX185666	RT-PCR from one individually dissected and RT-PCRed Caenorhabditis elegans linker cell, fourth larval stage (L4), nhr-67(RNAi), number 5	Caenorhabditis elegans	Illumina HiSeq 2000	Cal. Inst. of Tech., Division of Biology	SRP015688	C. elegans linker cell transcriptome	SRS361812		677.34	1	24093880	1204694000		RNA-Seq	TRANSCRIPTOMIC	RT-PCR
SRR566376	SRX185667	RT-PCR from one individually dissected and RT-PCRed Caenorhabditis elegans linker cell, third larval stage (L3), number 1	Caenorhabditis elegans	Illumina HiSeq 2000	Cal. Inst. of Tech., Division of Biology	SRP015688	C. elegans linker cell transcriptome	SRS361813		550.86	1	20634803	1031740150		RNA-Seq	TRANSCRIPTOMIC	RT-PCR
SRR566377	SRX185668	RT-PCR from one individually dissected and RT-PCRed Caenorhabditis elegans linker cell, third larval stage (L3), number 2	Caenorhabditis elegans	Illumina HiSeq 2000	Cal. Inst. of Tech., Division of Biology	SRP015688	C. elegans linker cell transcriptome	SRS361814		93.72	1	4285873	214293650		RNA-Seq	TRANSCRIPTOMIC	RT-PCR
SRR566378	SRX185669	RT-PCR from one individually dissected and RT-PCRed Caenorhabditis elegans linker cell, third larval stage (L3), number 3	Caenorhabditis elegans	Illumina HiSeq 2000	Cal. Inst. of Tech., Division of Biology	SRP015688	C. elegans linker cell transcriptome	SRS361815		670.33	1	24131965	1206598250		RNA-Seq	TRANSCRIPTOMIC	RT-PCR
SRR566379	SRX185670	RT-PCR from one individually dissected and RT-PCRed Caenorhabditis elegans linker cell, third larval stage (L3), number 4	Caenorhabditis elegans	Illumina HiSeq 2000	Cal. Inst. of Tech., Division of Biology	SRP015688	C. elegans linker cell transcriptome	SRS361816		531.47	1	19142982	957149100		RNA-Seq	TRANSCRIPTOMIC	RT-PCR
SRR566380	SRX185672	RT-PCR from one individually dissected and RT-PCRed Caenorhabditis elegans linker cell, third larval stage (L3), number 5	Caenorhabditis elegans	Illumina HiSeq 2000	Cal. Inst. of Tech., Division of Biology	SRP015688	C. elegans linker cell transcriptome	SRS361817		643.57	1	23345294	1167264700		RNA-Seq	TRANSCRIPTOMIC	RT-PCR
SRR566381	SRX185674	RT-PCR from one individually dissected and RT-PCRed Caenorhabditis elegans linker cell, fourth larval stage (L4), number 1	Caenorhabditis elegans	Illumina HiSeq 2000	Cal. Inst. of Tech., Division of Biology	SRP015688	C. elegans linker cell transcriptome	SRS361818		594.01	1	21467883	1073394150		RNA-Seq	TRANSCRIPTOMIC	RT-PCR
SRR566382	SRX185676	RT-PCR from one individually dissected and RT-PCRed Caenorhabditis elegans linker cell, fourth larval stage (L4), number 2	Caenorhabditis elegans	Illumina HiSeq 2000	Cal. Inst. of Tech., Division of Biology	SRP015688	C. elegans linker cell transcriptome	SRS361819		622.84	1	22455590	1122779500		RNA-Seq	TRANSCRIPTOMIC	RT-PCR
SRR566383	SRX185678	RT-PCR from one individually dissected and RT-PCRed Caenorhabditis elegans linker cell, fourth larval stage (L4), number 3	Caenorhabditis elegans	Illumina HiSeq 2000	Cal. Inst. of Tech., Division of Biology	SRP015688	C. elegans linker cell transcriptome	SRS361820		608.91	1	22466943	1123347150		RNA-Seq	TRANSCRIPTOMIC	RT-PCR
SRR566385	SRX185680	RT-PCR from one individually dissected and RT-PCRed Caenorhabditis elegans linker cell, fourth larval stage (L4), number 4	Caenorhabditis elegans	Illumina HiSeq 2000	Cal. Inst. of Tech., Division of Biology	SRP015688	C. elegans linker cell transcriptome	SRS361821		85.77	1	4028372	201418600		RNA-Seq	TRANSCRIPTOMIC	RT-PCR
SRR566409	SRX185681	RT-PCR from one individually dissected and RT-PCRed Caenorhabditis elegans linker cell, fourth larval stage (L4), number 5	Caenorhabditis elegans	Illumina HiSeq 2000	Cal. Inst. of Tech., Division of Biology	SRP015688	C. elegans linker cell transcriptome	SRS361822		597.55	1	21999111	1099955550		RNA-Seq	TRANSCRIPTOMIC	RT-PCR
SRR567991	SRX185938	Illumina HiSeq 2000 sequencing of C. elegans EMS and P2 blastomeres, set 2; P3 and C blastomeres, set 1	Caenorhabditis elegans	Illumina HiSeq 2000	Technion	SRP014672	CEL-Seq transcriptomic analysis of C. elegans blastomeres	SRS362091		5749.89	1	130840321	8504620865		RNA-Seq	TRANSCRIPTOMIC	cDNA
SRR567990	SRX185939	Illumina HiSeq 2000 sequencing of C. elegans EMS and P2 blastomeres, set 1	Caenorhabditis elegans	Illumina HiSeq 2000	Technion	SRP014672	CEL-Seq transcriptomic analysis of C. elegans blastomeres	SRS362090	worm	5395.1	1	127457213	8284718845		RNA-Seq	TRANSCRIPTOMIC	cDNA
SRR567992	SRX185940	Illumina HiSeq 2000 sequencing of C. elegans C and P3 blastomeres, set 2	Caenorhabditis elegans	Illumina HiSeq 2000	Technion	SRP014672	CEL-Seq transcriptomic analysis of C. elegans blastomeres	SRS362092	worm	11441.4	1	265233881	17240202265		RNA-Seq	TRANSCRIPTOMIC	cDNA
SRR568002	SRX186531	Illumina HiSeq 2000 sequencing of Dilution Series	Caenorhabditis elegans	Illumina HiSeq 2000	Technion	SRP014672	CEL-Seq transcriptomic analysis of C. elegans blastomeres	SRS362582	Worm	5417.53	1	84622551	11508666936		RNA-Seq	TRANSCRIPTOMIC	cDNA
SRR568003	SRX186532	Illumina HiSeq 2000 Sequencing of C. elegans Reference RNA	Caenorhabditis elegans	Illumina HiSeq 2000	Technion	SRP014672	CEL-Seq transcriptomic analysis of C. elegans blastomeres	SRS362583	Worm	632.92	1	10143510	1379517360		RNA-Seq	TRANSCRIPTOMIC	cDNA
SRR568008	SRX186533	Illumina HiSeq 2000 Sequencing of C. elegans AB/P1 blastomeres, set 2	Caenorhabditis elegans	Illumina HiSeq 2000	Technion	SRP014672	CEL-Seq transcriptomic analysis of C. elegans blastomeres	SRS362264	Worm	4416.13	1	43166159	8719564118		RNA-Seq	TRANSCRIPTOMIC	cDNA
SRR575472	SRX189087	GSM1008107: N2_inf; Caenorhabditis elegans; RNA-Seq	Caenorhabditis elegans	Illumina HiSeq 2000	GEO	SRP015836	Changes in small RNAs upon Viral infection of C.elegans	SRS365182		463.42	1	20437866	735763176		RNA-Seq	TRANSCRIPTOMIC	cDNA
SRR575473	SRX189088	GSM1008108: N2_non_inf_1; Caenorhabditis elegans; RNA-Seq	Caenorhabditis elegans	Illumina HiSeq 2000	GEO	SRP015836	Changes in small RNAs upon Viral infection of C.elegans	SRS365183		571.73	1	25288369	910381284		RNA-Seq	TRANSCRIPTOMIC	cDNA
SRR575474	SRX189089	GSM1008109: N2_non_inf_2; Caenorhabditis elegans; RNA-Seq	Caenorhabditis elegans	Illumina HiSeq 2000	GEO	SRP015836	Changes in small RNAs upon Viral infection of C.elegans	SRS365184		504.05	1	22317455	803428380		RNA-Seq	TRANSCRIPTOMIC	cDNA
SRR575475	SRX189090	GSM1008110: rde1_inf; Caenorhabditis elegans; RNA-Seq	Caenorhabditis elegans	Illumina HiSeq 2000	GEO	SRP015836	Changes in small RNAs upon Viral infection of C.elegans	SRS365185		266.28	1	11737356	422544816		RNA-Seq	TRANSCRIPTOMIC	cDNA
SRR575476	SRX189091	GSM1008111: rde1_non_inf_1; Caenorhabditis elegans; RNA-Seq	Caenorhabditis elegans	Illumina HiSeq 2000	GEO	SRP015836	Changes in small RNAs upon Viral infection of C.elegans	SRS365186		524.78	1	23147727	833318172		RNA-Seq	TRANSCRIPTOMIC	cDNA
SRR575477	SRX189092	GSM1008112: rde1_non_inf_2; Caenorhabditis elegans; RNA-Seq	Caenorhabditis elegans	Illumina HiSeq 2000	GEO	SRP015836	Changes in small RNAs upon Viral infection of C.elegans	SRS365187		593.61	1	26558545	956107620		RNA-Seq	TRANSCRIPTOMIC	cDNA
SRR577049	SRX189885	GSM1010460: WT; Caenorhabditis elegans; RNA-Seq	Caenorhabditis elegans	Illumina HiSeq 2000	GEO	SRP015918	Influence of p38 MAPK (PMK-1) on the heat stress response of C. elegans	SRS365668	12409482	608064618		RNA-Seq	TRANSCRIPTOMIC	cDNA
SRR577050	SRX189886	GSM1010461: KU; Caenorhabditis elegans; RNA-Seq	Caenorhabditis elegans	Illumina HiSeq 2000	GEO	SRP015918	Influence of p38 MAPK (PMK-1) on the heat stress response of C. elegans	SRS365669		347.11	1	11823349	579344101		RNA-Seq	TRANSCRIPTOMIC	cDNA
SRR578030	SRX190363	Illumina sequencing of C. elegans DZ685 embryonic Z1/Z4 cells library FGSR239 - total RNA - DSN treated - RNAseq random fragment library 50bp SE RW0001	Caenorhabditis elegans	Illumina MiSeq	UWGS-RW	SRP000401	Deep sequencing of the Caenorhabditis elegans transcriptome using RNA isolated from various developmental stages under various experimental conditions RW0001	SRS344160		0.94	1	28690	1434500	DMM239_Z1Z4_Em	RNA-Seq	TRANSCRIPTOMIC	cDNA
SRR578031	SRX190364	Illumina sequencing of C. elegans N2 early embryo reference cells library FGSR260 - total RNA - DSN treated - RNAseq random fragment library 50bp SE RW0001	Caenorhabditis elegans	Illumina MiSeq	UWGS-RW	SRP000401	Deep sequencing of the Caenorhabditis elegans transcriptome using RNA isolated from various developmental stages under various experimental conditions RW0001	SRS344159	433192	21659600	DMM260_N2ref_EE	RNA-Seq	TRANSCRIPTOMIC	cDNA
SRR578032	SRX190365	Illumina sequencing of C. elegans NW1229 larval L1 all neuron library FGSR381 - total RNA - DSN treated – RNAseq random fragment library 50bp SE RW0001	Caenorhabditis elegans	Illumina MiSeq	UWGS-RW	SRP000401	Deep sequencing of the Caenorhabditis elegans transcriptome using RNA isolated from various developmental stages under various experimental conditions RW0001	SRS344162		3.72	1	113579	5678950	DMM381_all-nrn_L1	RNA-Seq	TRANSCRIPTOMIC	cDNA
SRR578033	SRX190366	Illumina sequencing of C. elegans NW1229 larval L1 all neuron library FGSR383 - total RNA - DSN treated - RNAseq random fragment library 50bp SE RW0001	Caenorhabditis elegans	Illumina MiSeq	UWGS-RW	SRP000401	Deep sequencing of the Caenorhabditis elegans transcriptome using RNA isolated from various developmental stages under various experimental conditions RW0001	SRS344161		7.95	1	254591	12729550	DMM383_all-nrn_L1	RNA-Seq	TRANSCRIPTOMIC	cDNA
SRR578034	SRX190367	Illumina sequencing of C. elegans N2 adult gonad Ad_gonad-1 ribozero low input treated - total RNA - RNAseq random fragment library 50bp SE RW0001	Caenorhabditis elegans	Illumina MiSeq	UWGS-RW	SRP000401	Deep sequencing of the Caenorhabditis elegans transcriptome using RNA isolated from various developmental stages under various experimental conditions RW0001	SRS344182	111392	5569600	N2_Ad_gonad-1-RZLI	RNA-Seq	TRANSCRIPTOMIC	cDNA
SRR578035	SRX190368	Illumina sequencing of C. elegans LX837 larval L1 NSM neuron library FGSR389 - total RNA - DSN treated - RNAseq random fragment library 50bp SE RW0001	Caenorhabditis elegans	Illumina MiSeq	UWGS-RW	SRP000401	Deep sequencing of the Caenorhabditis elegans transcriptome using RNA isolated from various developmental stages under various experimental conditions RW0001	SRS344181		0.36	1	10210	510500	DMM389_NSM_L1	RNA-Seq	TRANSCRIPTOMIC	cDNA
SRR578143	SRX190369	Illumina sequencing of C. elegans N2 early embryos treated with Ribo-zero - RNAseq random fragment library 50bp SE RW0001	Caenorhabditis elegans	Illumina MiSeq	UWGS-RW	SRP000401	Deep sequencing of the Caenorhabditis elegans transcriptome using RNA isolated from various developmental stages under various experimental conditions RW0001	SRS311907	59825	2991250	N2_EE_RZ-54	RNA-Seq	TRANSCRIPTOMIC	cDNA
SRR578144	SRX190370	Illumina sequencing of C. elegans N2 larval L2 treated with Ribo-zero - RNAseq random fragment library 50bp SE RW0001	Caenorhabditis elegans	Illumina MiSeq	UWGS-RW	SRP000401	Deep sequencing of the Caenorhabditis elegans transcriptome using RNA isolated from various developmental stages under various experimental conditions RW0001	SRS311908	61864	3093200	N2_L2_RZ-53	RNA-Seq	TRANSCRIPTOMIC	cDNA
SRR580383	SRX191947	GSM1015702: C.elegans XX 1; Caenorhabditis elegans; RNA-Seq	Caenorhabditis elegans	Illumina Genome Analyzer IIx	GEO	SRP016006	Caenorhabditis sex-specific RNAseq	SRS367358		578.48	1	26708038	961489368		RNA-Seq	TRANSCRIPTOMIC	cDNA
SRR580384	SRX191948	GSM1015703: C.elegans XX 2; Caenorhabditis elegans; RNA-Seq	Caenorhabditis elegans	Illumina HiSeq 2000	GEO	SRP016006	Caenorhabditis sex-specific RNAseq	SRS367359		622.92	1	28711730	1033622280		RNA-Seq	TRANSCRIPTOMIC	cDNA
SRR580385	SRX191949	GSM1015704: C.elegans XX 3; Caenorhabditis elegans; RNA-Seq	Caenorhabditis elegans	Illumina HiSeq 2000	GEO	SRP016006	Caenorhabditis sex-specific RNAseq	SRS367360		443.31	1	20174660	726287760		RNA-Seq	TRANSCRIPTOMIC	cDNA
SRR580386	SRX191950	GSM1015705: C. elegans XO 1; Caenorhabditis elegans; RNA-Seq	Caenorhabditis elegans	Illumina Genome Analyzer IIx	GEO	SRP016006	Caenorhabditis sex-specific RNAseq	SRS367361		535.19	1	23534532	847243152		RNA-Seq	TRANSCRIPTOMIC	cDNA
SRR580387	SRX191951	GSM1015706: C. elegans XO 2; Caenorhabditis elegans; RNA-Seq	Caenorhabditis elegans	Illumina HiSeq 2000	GEO	SRP016006	Caenorhabditis sex-specific RNAseq	SRS367362		592.59	1	27405842	986610312		RNA-Seq	TRANSCRIPTOMIC	cDNA
SRR580388	SRX191952	GSM1015707: C. elegans XO 3; Caenorhabditis elegans; RNA-Seq	Caenorhabditis elegans	Illumina HiSeq 2000	GEO	SRP016006	Caenorhabditis sex-specific RNAseq	SRS367363		546.51	1	24957082	898454952		RNA-Seq	TRANSCRIPTOMIC	cDNA
SRR628913	SRX208779	GSM1048425: BC183 [RNA-Seq]; Caenorhabditis elegans; RNA-Seq	Caenorhabditis elegans	Illumina HiSeq 2000	GEO	SRP017438	Integral nuclear pore proteins bind to Pol III genes and are required for Pol III transcript processing in C. elegans [seq]	SRS378626		7146.16	1	214780500	10739025000		RNA-Seq	TRANSCRIPTOMIC	cDNA
SRR628914	SRX208780	GSM1048426: BC184 [RNA-Seq]; Caenorhabditis elegans; RNA-Seq	Caenorhabditis elegans	Illumina HiSeq 2000	GEO	SRP017438	Integral nuclear pore proteins bind to Pol III genes and are required for Pol III transcript processing in C. elegans [seq]	SRS378627		6500.5	1	202538349	10126917450		RNA-Seq	TRANSCRIPTOMIC	cDNA
SRR628915	SRX208781	GSM1048427: BC185 [RNA-Seq]; Caenorhabditis elegans; RNA-Seq	Caenorhabditis elegans	Illumina HiSeq 2000	GEO	SRP017438	Integral nuclear pore proteins bind to Pol III genes and are required for Pol III transcript processing in C. elegans [seq]	SRS378628		6310.9	1	198060328	9903016400		RNA-Seq	TRANSCRIPTOMIC	cDNA
SRR629993	SRX209303	GSM1050558: short_capRNA_1; Caenorhabditis elegans; RNA-Seq	Caenorhabditis elegans	Illumina Genome Analyzer IIx	GEO	SRP017486	The landscape of RNA polymerase II transcription initiation in C. elegans reveals a novel regulatory architecture	SRS379145		574.87	1	23498225	845936100		RNA-Seq	TRANSCRIPTOMIC	cDNA
SRR629994	SRX209304	GSM1050559: short_capRNA__1_tech; Caenorhabditis elegans; RNA-Seq	Caenorhabditis elegans	Illumina HiSeq 2000	GEO	SRP017486	The landscape of RNA polymerase II transcription initiation in C. elegans reveals a novel regulatory architecture	SRS379146		1763.69	1	29005732	2900573200		RNA-Seq	TRANSCRIPTOMIC	cDNA
SRR629995	SRX209305	GSM1050560: short_capRNA_2; Caenorhabditis elegans; RNA-Seq	Caenorhabditis elegans	Illumina Genome Analyzer IIx	GEO	SRP017486	The landscape of RNA polymerase II transcription initiation in C. elegans reveals a novel regulatory architecture	SRS379147		284.37	1	11244538	416047906		RNA-Seq	TRANSCRIPTOMIC	cDNA
SRR629996	SRX209306	GSM1050561: long_capRNA_1; Caenorhabditis elegans; RNA-Seq	Caenorhabditis elegans	Illumina Genome Analyzer IIx	GEO	SRP017486	The landscape of RNA polymerase II transcription initiation in C. elegans reveals a novel regulatory architecture	SRS379148		1689.2	1	27592737	2759273700		RNA-Seq	TRANSCRIPTOMIC	cDNA
SRR629997	SRX209307	GSM1050562: long_capRNA_2; Caenorhabditis elegans; RNA-Seq	Caenorhabditis elegans	Illumina Genome Analyzer IIx	GEO	SRP017486	The landscape of RNA polymerase II transcription initiation in C. elegans reveals a novel regulatory architecture	SRS379149		1931.77	1	30672487	3067248700		RNA-Seq	TRANSCRIPTOMIC	cDNA
SRR638942	SRX212092	C. elegans wild-type strain LE2544 (lqIs80 IV; lqIs58 V), early L1 larvae transcriptome (replicate library 1, lane 1)	Caenorhabditis elegans	Illumina Genome Analyzer II	University of Kansas	SRP017621	Using RNA-seq to identify transcriptional targets of MAB-5 in C. elegans	SRS380989	20024460	1181443140		RNA-Seq	TRANSCRIPTOMIC	RANDOM
SRR638946	SRX212095	C. elegans wild-type strain LE2544 (lqIs80 IV; lqIs58 V), early L1 larvae transcriptome (replicate library 1, lane 2)	Caenorhabditis elegans	Illumina Genome Analyzer IIx	University of Kansas	SRP017621	Using RNA-seq to identify transcriptional targets of MAB-5 in C. elegans	SRS380989	31689627	1901377620		RNA-Seq	TRANSCRIPTOMIC	RANDOM
SRR638971	SRX212097	C. elegans wild-type strain LE2544 (lqIs80 IV; lqIs58 V), early L1 larvae transcriptome (replicate library 2, lane 1)	Caenorhabditis elegans	Illumina Genome Analyzer IIx	University of Kansas	SRP017621	Using RNA-seq to identify transcriptional targets of MAB-5 in C. elegans	SRS380989	35676607	2104919813		RNA-Seq	TRANSCRIPTOMIC	RANDOM
SRR639015	SRX212098	C. elegans wild-type strain LE2544 (lqIs80 IV; lqIs58 V), early L1 larvae transcriptome (replicate library 2, lane 2)	Caenorhabditis elegans	Illumina Genome Analyzer IIx	University of Kansas	SRP017621	Using RNA-seq to identify transcriptional targets of MAB-5 in C. elegans	SRS380989	31413056	1853370304		RNA-Seq	TRANSCRIPTOMIC	RANDOM
SRR639020	SRX212099	C. elegans wild-type strain LE2544 (lqIs80 IV; lqIs58 V), early L1 larvae transcriptome (replicate library 3, lane 1)	Caenorhabditis elegans	Illumina Genome Analyzer IIx	University of Kansas	SRP017621	Using RNA-seq to identify transcriptional targets of MAB-5 in C. elegans	SRS380989	31331359	1848550181		RNA-Seq	TRANSCRIPTOMIC	RANDOM
SRR639021	SRX212100	C. elegans wild-type strain LE2544 (lqIs80 IV; lqIs58 V), early L1 larvae transcriptome (replicate library 3, lane 2)	Caenorhabditis elegans	Illumina Genome Analyzer IIx	University of Kansas	SRP017621	Using RNA-seq to identify transcriptional targets of MAB-5 in C. elegans	SRS380989	36553471	2156654789		RNA-Seq	TRANSCRIPTOMIC	RANDOM
SRR639022	SRX212101	C. elegans wild-type strain LE2544 (lqIs80 IV; lqIs58 V), early L1 larvae transcriptome (replicate library 4, lane 1)	Caenorhabditis elegans	Illumina Genome Analyzer IIx	University of Kansas	SRP017621	Using RNA-seq to identify transcriptional targets of MAB-5 in C. elegans	SRS380989	32546737	1920257483		RNA-Seq	TRANSCRIPTOMIC	RANDOM
SRR639023	SRX212102	C. elegans wild-type strain LE2544 (lqIs80 IV; lqIs58 V), early L1 larvae transcriptome (replicate library 4, lane 2)	Caenorhabditis elegans	Illumina Genome Analyzer IIx	University of Kansas	SRP017621	Using RNA-seq to identify transcriptional targets of MAB-5 in C. elegans	SRS380989	32577663	1922082117		RNA-Seq	TRANSCRIPTOMIC	RANDOM
SRR639082	SRX212103	C. elegans loss-of-function strain LE2962 (mab-5(e1239) III; lqIs80 IV; lqIs58 V), early L1 larvae transcriptome (replicate library 1, lane 1)	Caenorhabditis elegans	Illumina Genome Analyzer IIx	University of Kansas	SRP017621	Using RNA-seq to identify transcriptional targets of MAB-5 in C. elegans	SRS380992		881.43	1	28449553	1678523627		RNA-Seq	TRANSCRIPTOMIC	RANDOM
SRR639084	SRX212104	C. elegans loss-of-function strain LE2962 (mab-5(e1239) III; lqIs80 IV; lqIs58 V), early L1 larvae transcriptome (replicate library 1, lane 2)	Caenorhabditis elegans	Illumina Genome Analyzer IIx	University of Kansas	SRP017621	Using RNA-seq to identify transcriptional targets of MAB-5 in C. elegans	SRS380992		1050.07	1	34284945	2022811755		RNA-Seq	TRANSCRIPTOMIC	RANDOM
SRR639087	SRX212105	C. elegans loss-of-function strain LE2962 (mab-5(e1239) III; lqIs80 IV; lqIs58 V), early L1 larvae transcriptome (replicate library 2, lane 1)	Caenorhabditis elegans	Illumina Genome Analyzer IIx	University of Kansas	SRP017621	Using RNA-seq to identify transcriptional targets of MAB-5 in C. elegans	SRS380992		851.96	1	29127307	1718511113		RNA-Seq	TRANSCRIPTOMIC	RANDOM
SRR639088	SRX212106	C. elegans loss-of-function strain LE2962 (mab-5(e1239) III; lqIs80 IV; lqIs58 V), early L1 larvae transcriptome (replicate library 2, lane 2)	Caenorhabditis elegans	Illumina Genome Analyzer IIx	University of Kansas	SRP017621	Using RNA-seq to identify transcriptional targets of MAB-5 in C. elegans	SRS380992		855.45	1	28910650	1705728350		RNA-Seq	TRANSCRIPTOMIC	RANDOM
SRR639089	SRX212107	C. elegans loss-of-function strain LE2962 (mab-5(e1239) III; lqIs80 IV; lqIs58 V), early L1 larvae transcriptome (replicate library 3, lane 1)	Caenorhabditis elegans	Illumina Genome Analyzer IIx	University of Kansas	SRP017621	Using RNA-seq to identify transcriptional targets of MAB-5 in C. elegans	SRS380992		1041.91	1	33628057	1984055363		RNA-Seq	TRANSCRIPTOMIC	RANDOM
SRR639090	SRX212109	C. elegans loss-of-function strain LE2962 (mab-5(e1239) III; lqIs80 IV; lqIs58 V), early L1 larvae transcriptome (replicate library 3, lane 2	Caenorhabditis elegans	Illumina Genome Analyzer IIx	University of Kansas	SRP017621	Using RNA-seq to identify transcriptional targets of MAB-5 in C. elegans	SRS380992		930.08	1	30371993	1791947587		RNA-Seq	TRANSCRIPTOMIC	RANDOM
SRR639091	SRX212110	C. elegans loss-of-function strain LE2963 (mab-5(gk670) III; lqIs80 IV; lqIs58 V), early L1 larvae transcriptome (replicate library 1, lane 1)	Caenorhabditis elegans	Illumina Genome Analyzer IIx	University of Kansas	SRP017621	Using RNA-seq to identify transcriptional targets of MAB-5 in C. elegans	SRS380994		895.57	1	29817853	1759253327		RNA-Seq	TRANSCRIPTOMIC	RANDOM
SRR639092	SRX212111	C. elegans loss-of-function strain LE2963 (mab-5(gk670) III; lqIs80 IV; lqIs58 V), early L1 larvae transcriptome (replicate library 1, lane 2)	Caenorhabditis elegans	Illumina Genome Analyzer IIx	University of Kansas	SRP017621	Using RNA-seq to identify transcriptional targets of MAB-5 in C. elegans	SRS380994		802.85	1	27842914	1642731926		RNA-Seq	TRANSCRIPTOMIC	RANDOM
SRR639093	SRX212112	C. elegans loss-of-function strain LE2963 (mab-5(gk670) III; lqIs80 IV; lqIs58 V), early L1 larvae transcriptome (replicate library 2, lane 1)	Caenorhabditis elegans	Illumina Genome Analyzer IIx	University of Kansas	SRP017621	Using RNA-seq to identify transcriptional targets of MAB-5 in C. elegans	SRS380994		1048.22	1	34065979	2009892761		RNA-Seq	TRANSCRIPTOMIC	RANDOM
SRR639094	SRX212113	C. elegans loss-of-function strain LE2963 (mab-5(gk670) III; lqIs80 IV; lqIs58 V), early L1 larvae transcriptome (replicate library 2, lane 2)	Caenorhabditis elegans	Illumina Genome Analyzer IIx	University of Kansas	SRP017621	Using RNA-seq to identify transcriptional targets of MAB-5 in C. elegans	SRS380994		847.85	1	28381811	1674526849		RNA-Seq	TRANSCRIPTOMIC	RANDOM
SRR639095	SRX212114	C. elegans loss-of-function strain LE2963 (mab-5(gk670) III; lqIs80 IV; lqIs58 V), early L1 larvae transcriptome (replicate library 3, lane 1)	Caenorhabditis elegans	Illumina Genome Analyzer IIx	University of Kansas	SRP017621	Using RNA-seq to identify transcriptional targets of MAB-5 in C. elegans	SRS380994		958.22	1	30860833	1820789147		RNA-Seq	TRANSCRIPTOMIC	RANDOM
SRR639096	SRX212115	C. elegans loss-of-function strain LE2963 (mab-5(gk670) III; lqIs80 IV; lqIs58 V), early L1 larvae transcriptome (replicate library 3, lane 2)	Caenorhabditis elegans	Illumina Genome Analyzer IIx	University of Kansas	SRP017621	Using RNA-seq to identify transcriptional targets of MAB-5 in C. elegans	SRS380994		1112.45	1	33151129	1955916611		RNA-Seq	TRANSCRIPTOMIC	RANDOM
SRR639097	SRX212116	C. elegans gain-of-function strain LE3037 (mab-5(e1751) III; lqIs80 IV; lqIs58 V), early L1 larvae transcriptome (replicate library 1, lane 1)	Caenorhabditis elegans	Illumina Genome Analyzer IIx	University of Kansas	SRP017621	Using RNA-seq to identify transcriptional targets of MAB-5 in C. elegans	SRS380996		839.88	1	28393838	1675236442		RNA-Seq	TRANSCRIPTOMIC	RANDOM
SRR639098	SRX212118	C. elegans gain-of-function strain LE3037 (mab-5(e1751) III; lqIs80 IV; lqIs58 V), early L1 larvae transcriptome (replicate library 1, lane 2)	Caenorhabditis elegans	Illumina Genome Analyzer IIx	University of Kansas	SRP017621	Using RNA-seq to identify transcriptional targets of MAB-5 in C. elegans	SRS380996		935.95	1	31087954	1834189286		RNA-Seq	TRANSCRIPTOMIC	RANDOM
SRR639099	SRX212119	C. elegans gain-of-function strain LE3037 (mab-5(e1751) III; lqIs80 IV; lqIs58 V), early L1 larvae transcriptome (replicate library 2, lane 1)	Caenorhabditis elegans	Illumina Genome Analyzer IIx	University of Kansas	SRP017621	Using RNA-seq to identify transcriptional targets of MAB-5 in C. elegans	SRS380996		1078.54	1	34816531	2054175329		RNA-Seq	TRANSCRIPTOMIC	RANDOM
SRR639101	SRX212120	C. elegans gain-of-function strain LE3037 (mab-5(e1751) III; lqIs80 IV; lqIs58 V), early L1 larvae transcriptome (replicate library 2, lane 2)	Caenorhabditis elegans	Illumina Genome Analyzer IIx	University of Kansas	SRP017621	Using RNA-seq to identify transcriptional targets of MAB-5 in C. elegans	SRS380996		949.91	1	31715519	1871215621		RNA-Seq	TRANSCRIPTOMIC	RANDOM
SRR639102	SRX212121	C. elegans gain-of-function strain LE3037 (mab-5(e1751) III; lqIs80 IV; lqIs58 V), early L1 larvae transcriptome (replicate library 3, lane 1)	Caenorhabditis elegans	Illumina Genome Analyzer IIx	University of Kansas	SRP017621	Using RNA-seq to identify transcriptional targets of MAB-5 in C. elegans	SRS380996		894.09	1	29012335	1711727765		RNA-Seq	TRANSCRIPTOMIC	RANDOM
SRR639105	SRX212122	C. elegans gain-of-function strain LE3037 (mab-5(e1751) III; lqIs80 IV; lqIs58 V), early L1 larvae transcriptome (replicate library 3, lane 2)	Caenorhabditis elegans	Illumina Genome Analyzer IIx	University of Kansas	SRP017621	Using RNA-seq to identify transcriptional targets of MAB-5 in C. elegans	SRS380996		912.49	1	30170072	1780034248		RNA-Seq	TRANSCRIPTOMIC	RANDOM
SRR648322	SRX216722	daf-2_mRNA-Seq_d1a rep1	Caenorhabditis elegans	Illumina HiSeq 2000	Massachusetts General Hospital	SRP017908	DAF-16/FOXO uses SWI/SNF to regulate transcription.	SRS385579		646.51	1	20770842	1038542100		RNA-Seq	TRANSCRIPTOMIC	unspecified
SRR648323	SRX216723	daf-2_mRNA-Seq_d1a rep2	Caenorhabditis elegans	Illumina HiSeq 2000	Massachusetts General Hospital	SRP017908	DAF-16/FOXO uses SWI/SNF to regulate transcription.	SRS385580		574.64	1	18442191	922109550		RNA-Seq	TRANSCRIPTOMIC	unspecified
SRR648324	SRX216724	daf-2_daf-16_mRNA-Seq_d1a rep1	Caenorhabditis elegans	Illumina HiSeq 2000	Massachusetts General Hospital	SRP017908	DAF-16/FOXO uses SWI/SNF to regulate transcription.	SRS385581		615.93	1	19688702	984435100		RNA-Seq	TRANSCRIPTOMIC	unspecified
SRR648325	SRX216725	daf-2_daf-16_mRNA-Seq_d1a rep2	Caenorhabditis elegans	Illumina HiSeq 2000	Massachusetts General Hospital	SRP017908	DAF-16/FOXO uses SWI/SNF to regulate transcription.	SRS385582		469.75	1	15040892	752044600		RNA-Seq	TRANSCRIPTOMIC	unspecified
SRR648326	SRX216726	daf-2_swsn-1_mRNA-Seq_d1a rep1	Caenorhabditis elegans	Illumina HiSeq 2000	Massachusetts General Hospital	SRP017908	DAF-16/FOXO uses SWI/SNF to regulate transcription.	SRS385583		745.1	1	23863883	1193194150		RNA-Seq	TRANSCRIPTOMIC	unspecified
SRR648327	SRX216727	daf-2_swsn-1_mRNA-Seq_d1a rep2	Caenorhabditis elegans	Illumina HiSeq 2000	Massachusetts General Hospital	SRP017908	DAF-16/FOXO uses SWI/SNF to regulate transcription.	SRS385584		742.79	1	23898208	1194910400		RNA-Seq	TRANSCRIPTOMIC	unspecified
SRR650241	SRX218153	N2_mRNA-Seq_d1a rep1	Caenorhabditis elegans	Illumina HiSeq 2000	Massachusetts General Hospital	SRP017908	DAF-16/FOXO uses SWI/SNF to regulate transcription.	SRS385172	34915481	1745774050		RNA-Seq	TRANSCRIPTOMIC	unspecified
SRR650315	SRX218190	N2_mRNA-Seq_d1a rep2	Caenorhabditis elegans	Illumina HiSeq 2000	Massachusetts General Hospital	SRP017908	DAF-16/FOXO uses SWI/SNF to regulate transcription.	SRS386277	18756708	937835400		RNA-Seq	TRANSCRIPTOMIC	unspecified
SRR650494	SRX218380	GSM1067099: WT rep1; Caenorhabditis elegans; RNA-Seq	Caenorhabditis elegans	Illumina Genome Analyzer II	GEO	SRP018033	NO-mediated transcriptional response in C. elegans	SRS386406	13017223	663878373		RNA-Seq	TRANSCRIPTOMIC	cDNA
SRR650495	SRX218381	GSM1067100: WT rep2; Caenorhabditis elegans; RNA-Seq	Caenorhabditis elegans	Illumina Genome Analyzer II	GEO	SRP018033	NO-mediated transcriptional response in C. elegans	SRS386407	25091625	1279672875		RNA-Seq	TRANSCRIPTOMIC	cDNA
SRR650496	SRX218382	GSM1067101: WT + NO rep1; Caenorhabditis elegans; RNA-Seq	Caenorhabditis elegans	Illumina Genome Analyzer II	GEO	SRP018033	NO-mediated transcriptional response in C. elegans	SRS386408	45749496	2333224296		RNA-Seq	TRANSCRIPTOMIC	cDNA
SRR650497	SRX218383	GSM1067102: WT + NO rep2; Caenorhabditis elegans; RNA-Seq	Caenorhabditis elegans	Illumina Genome Analyzer II	GEO	SRP018033	NO-mediated transcriptional response in C. elegans	SRS386409	20648885	1053093135		RNA-Seq	TRANSCRIPTOMIC	cDNA
SRR748237	SRX243620	GSM1083459: C. elegans_degradome_12.03.2007; Caenorhabditis elegans; RNA-Seq	Caenorhabditis elegans	Illumina Genome Analyzer II	GEO	SRP018765	Degradome sequencing reveals an endogenous microRNA target in C. elegans	SRS396936		54.42	1	3650742	98570034		RNA-Seq	TRANSCRIPTOMIC	cDNA
SRR748238	SRX243621	GSM1083460: C. elegans_degradome_01.08.2008; Caenorhabditis elegans; RNA-Seq	Caenorhabditis elegans	Illumina Genome Analyzer II	GEO	SRP018765	Degradome sequencing reveals an endogenous microRNA target in C. elegans	SRS396937		117.12	1	4199695	151189020		RNA-Seq	TRANSCRIPTOMIC	cDNA
SRR748239	SRX243622	GSM1083461: C. elegans_degradome_02.14.2008; Caenorhabditis elegans; RNA-Seq	Caenorhabditis elegans	Illumina Genome Analyzer II	GEO	SRP018765	Degradome sequencing reveals an endogenous microRNA target in C. elegans	SRS396938		76.04	1	2736147	98501292		RNA-Seq	TRANSCRIPTOMIC	cDNA
SRR765840	SRX245821	GSM1088824: WT_rep1; Caenorhabditis elegans; RNA-Seq	Caenorhabditis elegans	Illumina Genome Analyzer IIx	GEO	SRP018867	Next generation sequencing facilitates quantitative analysis of Caenorhabditis elegans N2 wild type, emr-1(gk119), lem-2(tm1582) and emr-1(RNAi) lem-2(tm1582) transcriptomes.	SRS398378	23124744	3491836344		RNA-Seq	TRANSCRIPTOMIC	cDNA
SRR765841	SRX245822	GSM1088825: WT_rep2; Caenorhabditis elegans; RNA-Seq	Caenorhabditis elegans	Illumina Genome Analyzer IIx	GEO	SRP018867	Next generation sequencing facilitates quantitative analysis of Caenorhabditis elegans N2 wild type, emr-1(gk119), lem-2(tm1582) and emr-1(RNAi) lem-2(tm1582) transcriptomes.	SRS398379	21428153	3235651103		RNA-Seq	TRANSCRIPTOMIC	cDNA
SRR765842	SRX245823	GSM1088826: WT_rep3; Caenorhabditis elegans; RNA-Seq	Caenorhabditis elegans	Illumina Genome Analyzer IIx	GEO	SRP018867	Next generation sequencing facilitates quantitative analysis of Caenorhabditis elegans N2 wild type, emr-1(gk119), lem-2(tm1582) and emr-1(RNAi) lem-2(tm1582) transcriptomes.	SRS398380	21717698	3279372398		RNA-Seq	TRANSCRIPTOMIC	cDNA
SRR765843	SRX245824	GSM1088827: emr-1(gk119)_rep.1; Caenorhabditis elegans; RNA-Seq	Caenorhabditis elegans	Illumina Genome Analyzer IIx	GEO	SRP018867	Next generation sequencing facilitates quantitative analysis of Caenorhabditis elegans N2 wild type, emr-1(gk119), lem-2(tm1582) and emr-1(RNAi) lem-2(tm1582) transcriptomes.	SRS398381		2087.64	1	19968239	3015204089		RNA-Seq	TRANSCRIPTOMIC	cDNA
SRR765844	SRX245825	GSM1088828: emr-1(gk119)_rep.2; Caenorhabditis elegans; RNA-Seq	Caenorhabditis elegans	Illumina Genome Analyzer IIx	GEO	SRP018867	Next generation sequencing facilitates quantitative analysis of Caenorhabditis elegans N2 wild type, emr-1(gk119), lem-2(tm1582) and emr-1(RNAi) lem-2(tm1582) transcriptomes.	SRS398382		1657.45	1	16169031	2441523681		RNA-Seq	TRANSCRIPTOMIC	cDNA
SRR765845	SRX245826	GSM1088829: lem-2(tm1582)_rep.1; Caenorhabditis elegans; RNA-Seq	Caenorhabditis elegans	Illumina Genome Analyzer IIx	GEO	SRP018867	Next generation sequencing facilitates quantitative analysis of Caenorhabditis elegans N2 wild type, emr-1(gk119), lem-2(tm1582) and emr-1(RNAi) lem-2(tm1582) transcriptomes.	SRS398383		1989.17	1	19239517	2905167067		RNA-Seq	TRANSCRIPTOMIC	cDNA
SRR765846	SRX245827	GSM1088830: lem-2(tm1582)_rep.2; Caenorhabditis elegans; RNA-Seq	Caenorhabditis elegans	Illumina Genome Analyzer IIx	GEO	SRP018867	Next generation sequencing facilitates quantitative analysis of Caenorhabditis elegans N2 wild type, emr-1(gk119), lem-2(tm1582) and emr-1(RNAi) lem-2(tm1582) transcriptomes.	SRS398384		2379.53	1	23040811	3479162461		RNA-Seq	TRANSCRIPTOMIC	cDNA
SRR765847	SRX245828	GSM1088831: lem-2(tm1582)emr-1(RNAi)_rep.1; Caenorhabditis elegans; RNA-Seq	Caenorhabditis elegans	Illumina Genome Analyzer IIx	GEO	SRP018867	Next generation sequencing facilitates quantitative analysis of Caenorhabditis elegans N2 wild type, emr-1(gk119), lem-2(tm1582) and emr-1(RNAi) lem-2(tm1582) transcriptomes.	SRS398385		2443.99	1	23687051	3576744701		RNA-Seq	TRANSCRIPTOMIC	cDNA
SRR765848	SRX245829	GSM1088832: lem-2(tm1582)emr-1(RNAi)_rep.2; Caenorhabditis elegans; RNA-Seq	Caenorhabditis elegans	Illumina Genome Analyzer IIx	GEO	SRP018867	Next generation sequencing facilitates quantitative analysis of Caenorhabditis elegans N2 wild type, emr-1(gk119), lem-2(tm1582) and emr-1(RNAi) lem-2(tm1582) transcriptomes.	SRS398386		2716.75	1	26243018	3962695718		RNA-Seq	TRANSCRIPTOMIC	cDNA
SRR800730	SRX257710	GSM1111830: RNAseq Rep1; Caenorhabditis elegans; RNA-Seq	Caenorhabditis elegans	Illumina HiSeq 2000	GEO	SRP020357	Genome-wide distribution of the three condensin complexes in C. elegans	SRS405920		395.61	1	13069566	666547866		RNA-Seq	TRANSCRIPTOMIC	cDNA
SRR800731	SRX257711	GSM1111831: RNAseq Rep2; Caenorhabditis elegans; RNA-Seq	Caenorhabditis elegans	Illumina HiSeq 2000	GEO	SRP020357	Genome-wide distribution of the three condensin complexes in C. elegans	SRS405921		328.68	1	10788240	550200240		RNA-Seq	TRANSCRIPTOMIC	cDNA
SRR800732	SRX257712	GSM1111832: RNAseq Rep3; Caenorhabditis elegans; RNA-Seq	Caenorhabditis elegans	Illumina HiSeq 2000	GEO	SRP020357	Genome-wide distribution of the three condensin complexes in C. elegans	SRS405922		625.38	1	17433234	889094934		RNA-Seq	TRANSCRIPTOMIC	cDNA
SRR800733 SRR800734	SRX257713	GSM1111833: RNAseq Rep4; Caenorhabditis elegans; RNA-Seq	Caenorhabditis elegans	Illumina HiSeq 2000	GEO	SRP020357	Genome-wide distribution of the three condensin complexes in C. elegans	SRS405923		814.58	2	22096918	1126942818		RNA-Seq	TRANSCRIPTOMIC	cDNA
SRR800735	SRX257714	GSM1111834: RNAseq Rep5; Caenorhabditis elegans; RNA-Seq	Caenorhabditis elegans	Illumina HiSeq 2000	GEO	SRP020357	Genome-wide distribution of the three condensin complexes in C. elegans	SRS405924		931.7	1	25854937	1318601787		RNA-Seq	TRANSCRIPTOMIC	cDNA
SRR827423	SRX265354	GSM1122568: Nr01 DMSO 1day rep1; Caenorhabditis elegans; RNA-Seq	Caenorhabditis elegans	Illumina HiSeq 2000	GEO	SRP021083	Deep sequencing of endogenous mRNA from Caenorhabditis elegans in the presence and absence of rotenone at 4 different time points	SRS412493		1930.24	1	68645264	3432263200		RNA-Seq	TRANSCRIPTOMIC	cDNA
SRR827424	SRX265355	GSM1122569: Nr02 DMSO 1day rep2; Caenorhabditis elegans; RNA-Seq	Caenorhabditis elegans	Illumina HiSeq 2000	GEO	SRP021083	Deep sequencing of endogenous mRNA from Caenorhabditis elegans in the presence and absence of rotenone at 4 different time points	SRS412494		2339.79	1	81958411	4097920550		RNA-Seq	TRANSCRIPTOMIC	cDNA
SRR827425	SRX265356	GSM1122570: Nr03 DMSO 1day rep3; Caenorhabditis elegans; RNA-Seq	Caenorhabditis elegans	Illumina HiSeq 2000	GEO	SRP021083	Deep sequencing of endogenous mRNA from Caenorhabditis elegans in the presence and absence of rotenone at 4 different time points	SRS412495		1541.83	1	51779821	2588991050		RNA-Seq	TRANSCRIPTOMIC	cDNA
SRR827426	SRX265357	GSM1122571: Nr04 Rotenone 1day rep1; Caenorhabditis elegans; RNA-Seq	Caenorhabditis elegans	Illumina HiSeq 2000	GEO	SRP021083	Deep sequencing of endogenous mRNA from Caenorhabditis elegans in the presence and absence of rotenone at 4 different time points	SRS412496		1064.2	1	37302684	1865134200		RNA-Seq	TRANSCRIPTOMIC	cDNA
SRR827427	SRX265358	GSM1122572: Nr05 Rotenone 1day rep2; Caenorhabditis elegans; RNA-Seq	Caenorhabditis elegans	Illumina HiSeq 2000	GEO	SRP021083	Deep sequencing of endogenous mRNA from Caenorhabditis elegans in the presence and absence of rotenone at 4 different time points	SRS412497		2349.59	1	82545002	4127250100		RNA-Seq	TRANSCRIPTOMIC	cDNA
SRR827428	SRX265359	GSM1122573: Nr06 Rotenone 1day rep3; Caenorhabditis elegans; RNA-Seq	Caenorhabditis elegans	Illumina HiSeq 2000	GEO	SRP021083	Deep sequencing of endogenous mRNA from Caenorhabditis elegans in the presence and absence of rotenone at 4 different time points	SRS412498		1241.76	1	41412379	2070618950		RNA-Seq	TRANSCRIPTOMIC	cDNA
SRR827429	SRX265360	GSM1122574: Nr10 DMSO 5day rep1; Caenorhabditis elegans; RNA-Seq	Caenorhabditis elegans	Illumina HiSeq 2000	GEO	SRP021083	Deep sequencing of endogenous mRNA from Caenorhabditis elegans in the presence and absence of rotenone at 4 different time points	SRS412499		1455	1	51263915	2563195750		RNA-Seq	TRANSCRIPTOMIC	cDNA
SRR827430	SRX265361	GSM1122575: Nr11 DMSO 5day rep2; Caenorhabditis elegans; RNA-Seq	Caenorhabditis elegans	Illumina HiSeq 2000	GEO	SRP021083	Deep sequencing of endogenous mRNA from Caenorhabditis elegans in the presence and absence of rotenone at 4 different time points	SRS412500		1975.23	1	69278368	3463918400		RNA-Seq	TRANSCRIPTOMIC	cDNA
SRR827431	SRX265362	GSM1122576: Nr12 DMSO 5day rep3; Caenorhabditis elegans; RNA-Seq	Caenorhabditis elegans	Illumina HiSeq 2000	GEO	SRP021083	Deep sequencing of endogenous mRNA from Caenorhabditis elegans in the presence and absence of rotenone at 4 different time points	SRS412501		1321.04	1	44473943	2223697150		RNA-Seq	TRANSCRIPTOMIC	cDNA
SRR827432	SRX265363	GSM1122577: Nr13 Rotenone 5day rep1; Caenorhabditis elegans; RNA-Seq	Caenorhabditis elegans	Illumina HiSeq 2000	GEO	SRP021083	Deep sequencing of endogenous mRNA from Caenorhabditis elegans in the presence and absence of rotenone at 4 different time points	SRS412502		2496.85	1	88447218	4422360900		RNA-Seq	TRANSCRIPTOMIC	cDNA
SRR827433	SRX265364	GSM1122578: Nr14 Rotenone 5day rep2; Caenorhabditis elegans; RNA-Seq	Caenorhabditis elegans	Illumina HiSeq 2000	GEO	SRP021083	Deep sequencing of endogenous mRNA from Caenorhabditis elegans in the presence and absence of rotenone at 4 different time points	SRS412503		1271.73	1	44650820	2232541000		RNA-Seq	TRANSCRIPTOMIC	cDNA
SRR827434	SRX265365	GSM1122579: Nr15 Rotenone 5day rep3; Caenorhabditis elegans; RNA-Seq	Caenorhabditis elegans	Illumina HiSeq 2000	GEO	SRP021083	Deep sequencing of endogenous mRNA from Caenorhabditis elegans in the presence and absence of rotenone at 4 different time points	SRS412504		1089.4	1	36674199	1833709950		RNA-Seq	TRANSCRIPTOMIC	cDNA
SRR827435	SRX265366	GSM1122580: Nr19 DMSO 10day rep1; Caenorhabditis elegans; RNA-Seq	Caenorhabditis elegans	Illumina HiSeq 2000	GEO	SRP021083	Deep sequencing of endogenous mRNA from Caenorhabditis elegans in the presence and absence of rotenone at 4 different time points	SRS412505		1054.88	1	37337993	1866899650		RNA-Seq	TRANSCRIPTOMIC	cDNA
SRR827436	SRX265367	GSM1122581: Nr20 DMSO 10day rep2; Caenorhabditis elegans; RNA-Seq	Caenorhabditis elegans	Illumina HiSeq 2000	GEO	SRP021083	Deep sequencing of endogenous mRNA from Caenorhabditis elegans in the presence and absence of rotenone at 4 different time points	SRS412506		2358.13	1	82793654	4139682700		RNA-Seq	TRANSCRIPTOMIC	cDNA
SRR827437	SRX265368	GSM1122582: Nr21 DMSO 10day rep3; Caenorhabditis elegans; RNA-Seq	Caenorhabditis elegans	Illumina HiSeq 2000	GEO	SRP021083	Deep sequencing of endogenous mRNA from Caenorhabditis elegans in the presence and absence of rotenone at 4 different time points	SRS412507		1970.47	1	65963469	3298173450		RNA-Seq	TRANSCRIPTOMIC	cDNA
SRR827438	SRX265369	GSM1122583: Nr22 Rotenone 10day rep1; Caenorhabditis elegans; RNA-Seq	Caenorhabditis elegans	Illumina HiSeq 2000	GEO	SRP021083	Deep sequencing of endogenous mRNA from Caenorhabditis elegans in the presence and absence of rotenone at 4 different time points	SRS412508		2018.22	1	71193410	3559670500		RNA-Seq	TRANSCRIPTOMIC	cDNA
SRR827439	SRX265370	GSM1122584: Nr23 Rotenone 10day rep2; Caenorhabditis elegans; RNA-Seq	Caenorhabditis elegans	Illumina HiSeq 2000	GEO	SRP021083	Deep sequencing of endogenous mRNA from Caenorhabditis elegans in the presence and absence of rotenone at 4 different time points	SRS412509		2256.46	1	79163936	3958196800		RNA-Seq	TRANSCRIPTOMIC	cDNA
SRR827440	SRX265371	GSM1122585: Nr24 Rotenone 10day rep3; Caenorhabditis elegans; RNA-Seq	Caenorhabditis elegans	Illumina HiSeq 2000	GEO	SRP021083	Deep sequencing of endogenous mRNA from Caenorhabditis elegans in the presence and absence of rotenone at 4 different time points	SRS412510		2623.61	1	90515338	4525766900		RNA-Seq	TRANSCRIPTOMIC	cDNA
SRR827441	SRX265372	GSM1122586: Nr28 DMSO 20day rep1; Caenorhabditis elegans; RNA-Seq	Caenorhabditis elegans	Illumina HiSeq 2000	GEO	SRP021083	Deep sequencing of endogenous mRNA from Caenorhabditis elegans in the presence and absence of rotenone at 4 different time points	SRS412511		1950.75	1	68898440	3444922000		RNA-Seq	TRANSCRIPTOMIC	cDNA
SRR827442	SRX265373	GSM1122587: Nr29 DMSO 20day rep2; Caenorhabditis elegans; RNA-Seq	Caenorhabditis elegans	Illumina HiSeq 2000	GEO	SRP021083	Deep sequencing of endogenous mRNA from Caenorhabditis elegans in the presence and absence of rotenone at 4 different time points	SRS412512		991.69	1	34563636	1728181800		RNA-Seq	TRANSCRIPTOMIC	cDNA
SRR827443	SRX265374	GSM1122588: Nr30 Rotenone 20day rep1; Caenorhabditis elegans; RNA-Seq	Caenorhabditis elegans	Illumina HiSeq 2000	GEO	SRP021083	Deep sequencing of endogenous mRNA from Caenorhabditis elegans in the presence and absence of rotenone at 4 different time points	SRS412513		2492.06	1	88163555	4408177750		RNA-Seq	TRANSCRIPTOMIC	cDNA
SRR827444	SRX265375	GSM1122589: Nr31 Rotenone 20day rep2; Caenorhabditis elegans; RNA-Seq	Caenorhabditis elegans	Illumina HiSeq 2000	GEO	SRP021083	Deep sequencing of endogenous mRNA from Caenorhabditis elegans in the presence and absence of rotenone at 4 different time points	SRS412514		1284.83	1	45197186	2259859300		RNA-Seq	TRANSCRIPTOMIC	cDNA
SRR833240	SRX270953	GSM1127167: Nr35 48h H20 rep1; Caenorhabditis elegans; RNA-Seq	Caenorhabditis elegans	Illumina Genome Analyzer IIx	GEO	SRP021462	Deep sequencing of endogenous mRNA from Caenorhabditis elegans in the presence and absence of arsenite	SRS415425		1781.6	1	42496184	3229709984		RNA-Seq	TRANSCRIPTOMIC	cDNA
SRR833241	SRX270954	GSM1127168: Nr36 48h Arsen rep1; Caenorhabditis elegans; RNA-Seq	Caenorhabditis elegans	Illumina Genome Analyzer IIx	GEO	SRP021462	Deep sequencing of endogenous mRNA from Caenorhabditis elegans in the presence and absence of arsenite	SRS415426		1661.94	1	40537917	3080881692		RNA-Seq	TRANSCRIPTOMIC	cDNA
SRR833242	SRX270955	GSM1127169: Nr37 48h H20 rep2; Caenorhabditis elegans; RNA-Seq	Caenorhabditis elegans	Illumina Genome Analyzer IIx	GEO	SRP021462	Deep sequencing of endogenous mRNA from Caenorhabditis elegans in the presence and absence of arsenite	SRS415427		1546.81	1	37913346	2881414296		RNA-Seq	TRANSCRIPTOMIC	cDNA
SRR833243	SRX270956	GSM1127170: Nr38 48h Arsen rep2; Caenorhabditis elegans; RNA-Seq	Caenorhabditis elegans	Illumina Genome Analyzer IIx	GEO	SRP021462	Deep sequencing of endogenous mRNA from Caenorhabditis elegans in the presence and absence of arsenite	SRS415428		2025.82	1	47767624	3630339424		RNA-Seq	TRANSCRIPTOMIC	cDNA
SRR834594	SRX271488	GSM1128862: Nr07 DOG 1day rep1; Caenorhabditis elegans; RNA-Seq	Caenorhabditis elegans	Illumina HiSeq 2000	GEO	SRP021487	Deep sequencing of endogenous mRNA from Caenorhabditis elegans in the presence of 2-deoxy-D-glucose (DOG) at 4 different time points	SRS415923		872.65	1	30650959	1532547950		RNA-Seq	TRANSCRIPTOMIC	cDNA
SRR834595	SRX271489	GSM1128863: Nr08 DOG 1day rep2; Caenorhabditis elegans; RNA-Seq	Caenorhabditis elegans	Illumina HiSeq 2000	GEO	SRP021487	Deep sequencing of endogenous mRNA from Caenorhabditis elegans in the presence of 2-deoxy-D-glucose (DOG) at 4 different time points	SRS415924		1409.51	1	47245721	2362286050		RNA-Seq	TRANSCRIPTOMIC	cDNA
SRR834596	SRX271490	GSM1128864: Nr09 DOG 1day rep3; Caenorhabditis elegans; RNA-Seq	Caenorhabditis elegans	Illumina HiSeq 2000	GEO	SRP021487	Deep sequencing of endogenous mRNA from Caenorhabditis elegans in the presence of 2-deoxy-D-glucose (DOG) at 4 different time points	SRS415925		1623.61	1	54573311	2728665550		RNA-Seq	TRANSCRIPTOMIC	cDNA
SRR834597	SRX271491	GSM1128865: Nr16 DOG 5day rep1; Caenorhabditis elegans; RNA-Seq	Caenorhabditis elegans	Illumina HiSeq 2000	GEO	SRP021487	Deep sequencing of endogenous mRNA from Caenorhabditis elegans in the presence of 2-deoxy-D-glucose (DOG) at 4 different time points	SRS415926		1116.93	1	37136483	1856824150		RNA-Seq	TRANSCRIPTOMIC	cDNA
SRR834598	SRX271492	GSM1128866: Nr17 DOG 5day rep2; Caenorhabditis elegans; RNA-Seq	Caenorhabditis elegans	Illumina HiSeq 2000	GEO	SRP021487	Deep sequencing of endogenous mRNA from Caenorhabditis elegans in the presence of 2-deoxy-D-glucose (DOG) at 4 different time points	SRS415927		1172.28	1	41597033	2079851650		RNA-Seq	TRANSCRIPTOMIC	cDNA
SRR834599	SRX271493	GSM1128867: Nr18 DOG 5day rep3; Caenorhabditis elegans; RNA-Seq	Caenorhabditis elegans	Illumina HiSeq 2000	GEO	SRP021487	Deep sequencing of endogenous mRNA from Caenorhabditis elegans in the presence of 2-deoxy-D-glucose (DOG) at 4 different time points	SRS415928		1146.66	1	40244741	2012237050		RNA-Seq	TRANSCRIPTOMIC	cDNA
SRR834600	SRX271494	GSM1128868: Nr25 DOG 10day rep1; Caenorhabditis elegans; RNA-Seq	Caenorhabditis elegans	Illumina HiSeq 2000	GEO	SRP021487	Deep sequencing of endogenous mRNA from Caenorhabditis elegans in the presence of 2-deoxy-D-glucose (DOG) at 4 different time points	SRS415929		1415.28	1	49315179	2465758950		RNA-Seq	TRANSCRIPTOMIC	cDNA
SRR834601	SRX271495	GSM1128869: Nr26 DOG 10day rep2; Caenorhabditis elegans; RNA-Seq	Caenorhabditis elegans	Illumina HiSeq 2000	GEO	SRP021487	Deep sequencing of endogenous mRNA from Caenorhabditis elegans in the presence of 2-deoxy-D-glucose (DOG) at 4 different time points	SRS415930		1615.84	1	56295663	2814783150		RNA-Seq	TRANSCRIPTOMIC	cDNA
SRR834602	SRX271496	GSM1128870: Nr27 DOG 10day rep3; Caenorhabditis elegans; RNA-Seq	Caenorhabditis elegans	Illumina HiSeq 2000	GEO	SRP021487	Deep sequencing of endogenous mRNA from Caenorhabditis elegans in the presence of 2-deoxy-D-glucose (DOG) at 4 different time points	SRS415931		2035.04	1	68641842	3432092100		RNA-Seq	TRANSCRIPTOMIC	cDNA
SRR834603	SRX271497	GSM1128871: Nr32 DOG 20day rep1; Caenorhabditis elegans; RNA-Seq	Caenorhabditis elegans	Illumina HiSeq 2000	GEO	SRP021487	Deep sequencing of endogenous mRNA from Caenorhabditis elegans in the presence of 2-deoxy-D-glucose (DOG) at 4 different time points	SRS415932		1969.16	1	66209633	3310481650		RNA-Seq	TRANSCRIPTOMIC	cDNA
SRR834604	SRX271498	GSM1128872: Nr33 DOG 20day rep2; Caenorhabditis elegans; RNA-Seq	Caenorhabditis elegans	Illumina HiSeq 2000	GEO	SRP021487	Deep sequencing of endogenous mRNA from Caenorhabditis elegans in the presence of 2-deoxy-D-glucose (DOG) at 4 different time points	SRS415933		2079.96	1	72521536	3626076800		RNA-Seq	TRANSCRIPTOMIC	cDNA
SRR868958	SRX286929		Caenorhabditis elegans	Illumina HiSeq 2000	WUGSC	SRP023261	Caenorhabditis elegansTranscriptome or Gene expression	SRS429692		6753.51	1	53017572	10603514400	2890269226	RNA-Seq	TRANSCRIPTOMIC	unspecified
SRR868932	SRX286930		Caenorhabditis elegans	Illumina HiSeq 2000	WUGSC	SRP023261	Caenorhabditis elegansTranscriptome or Gene expression	SRS429693		4544.32	1	35210683	7042136600	2890269204	RNA-Seq	TRANSCRIPTOMIC	unspecified
SRR868957	SRX286931		Caenorhabditis elegans	Illumina HiSeq 2000	WUGSC	SRP023261	Caenorhabditis elegansTranscriptome or Gene expression	SRS429694		4520.68	1	35383355	7076671000	2890269211	RNA-Seq	TRANSCRIPTOMIC	unspecified
SRR868939	SRX286932		Caenorhabditis elegans	Illumina HiSeq 2000	WUGSC	SRP023261	Caenorhabditis elegansTranscriptome or Gene expression	SRS429696		3879.15	1	30383493	6076698600	2890269233	RNA-Seq	TRANSCRIPTOMIC	unspecified
SRR868942	SRX286933		Caenorhabditis elegans	Illumina HiSeq 2000	WUGSC	SRP023261	Caenorhabditis elegansTranscriptome or Gene expression	SRS429695		4529.18	1	35202128	7040425600	2890269219	RNA-Seq	TRANSCRIPTOMIC	unspecified
SRR873439	SRX290672	mRNA sequencing	Caenorhabditis elegans	Illumina Genome Analyzer II	ibp	SRP023543	Caenorhabditis elegans strain:N2 Transcriptome or Gene expression	SRS434662	23879025	2053596150		RNA-Seq	METATRANSCRIPTOMIC	cDNA
SRR879582	SRX293695	mRNA sequencing	Caenorhabditis elegans	Illumina Genome Analyzer II	ibp	SRP023543	Caenorhabditis elegans strain:N2 Transcriptome or Gene expression	SRS434661	34843264	2996520704		RNA-Seq	TRANSCRIPTOMIC	cDNA
SRR914328	SRX311774	GSM1169543: Celeg-1-ST-mRNA; Caenorhabditis elegans; RNA-Seq	Caenorhabditis elegans	Illumina HiSeq 2000	GEO	SRP026198	mRNA and Ribosome Profiling in Four Nematode Species Traversing a Shared Developmental Transition	SRS449591	19452670	972633500		RNA-Seq	TRANSCRIPTOMIC	cDNA
SRR914329	SRX311775	GSM1169544: Celeg-2-ST-mRNA; Caenorhabditis elegans; RNA-Seq	Caenorhabditis elegans	Illumina HiSeq 2000	GEO	SRP026198	mRNA and Ribosome Profiling in Four Nematode Species Traversing a Shared Developmental Transition	SRS449527	31547222	2366041650		RNA-Seq	TRANSCRIPTOMIC	cDNA
SRR914330	SRX311776	GSM1169545: Celeg-3-ST-mRNA; Caenorhabditis elegans; RNA-Seq	Caenorhabditis elegans	Illumina HiSeq 2000	GEO	SRP026198	mRNA and Ribosome Profiling in Four Nematode Species Traversing a Shared Developmental Transition	SRS449528	23438522	1171926100		RNA-Seq	TRANSCRIPTOMIC	cDNA
SRR914331	SRX311777	GSM1169546: Celeg-1-FED-mRNA; Caenorhabditis elegans; RNA-Seq	Caenorhabditis elegans	Illumina HiSeq 2000	GEO	SRP026198	mRNA and Ribosome Profiling in Four Nematode Species Traversing a Shared Developmental Transition	SRS449529	14429547	721477350		RNA-Seq	TRANSCRIPTOMIC	cDNA
SRR914332	SRX311778	GSM1169547: Celeg-2-FED-mRNA; Caenorhabditis elegans; RNA-Seq	Caenorhabditis elegans	Illumina HiSeq 2000	GEO	SRP026198	mRNA and Ribosome Profiling in Four Nematode Species Traversing a Shared Developmental Transition	SRS449530	15243931	762196550		RNA-Seq	TRANSCRIPTOMIC	cDNA
SRR914333	SRX311779	GSM1169548: Celeg-3-FED-mRNA; Caenorhabditis elegans; RNA-Seq	Caenorhabditis elegans	Illumina HiSeq 2000	GEO	SRP026198	mRNA and Ribosome Profiling in Four Nematode Species Traversing a Shared Developmental Transition	SRS449531	27043901	1352195050		RNA-Seq	TRANSCRIPTOMIC	cDNA
SRR914334	SRX311780	GSM1169549: Celeg-1-ST-RPF; Caenorhabditis elegans; OTHER	Caenorhabditis elegans	Illumina HiSeq 2000	GEO	SRP026198	mRNA and Ribosome Profiling in Four Nematode Species Traversing a Shared Developmental Transition	SRS449532	46096938	2304846900		OTHER	TRANSCRIPTOMIC	other
SRR914335	SRX311781	GSM1169550: Celeg-2-ST-RPF; Caenorhabditis elegans; OTHER	Caenorhabditis elegans	Illumina HiSeq 2000	GEO	SRP026198	mRNA and Ribosome Profiling in Four Nematode Species Traversing a Shared Developmental Transition	SRS449533	20851539	750655404		OTHER	TRANSCRIPTOMIC	other
SRR914336	SRX311782	GSM1169551: Celeg-3-ST-RPF; Caenorhabditis elegans; OTHER	Caenorhabditis elegans	Illumina HiSeq 2000	GEO	SRP026198	mRNA and Ribosome Profiling in Four Nematode Species Traversing a Shared Developmental Transition	SRS449534	50278819	2513940950		OTHER	TRANSCRIPTOMIC	other
SRR914337	SRX311783	GSM1169552: Celeg-1-FED-RPF; Caenorhabditis elegans; OTHER	Caenorhabditis elegans	Illumina HiSeq 2000	GEO	SRP026198	mRNA and Ribosome Profiling in Four Nematode Species Traversing a Shared Developmental Transition	SRS449535	30099263	1504963150		OTHER	TRANSCRIPTOMIC	other
SRR914338	SRX311784	GSM1169553: Celeg-2-FED-RPF; Caenorhabditis elegans; OTHER	Caenorhabditis elegans	Illumina HiSeq 2000	GEO	SRP026198	mRNA and Ribosome Profiling in Four Nematode Species Traversing a Shared Developmental Transition	SRS449536	59233837	2961691850		OTHER	TRANSCRIPTOMIC	other
SRR914339	SRX311785	GSM1169554: Celeg-3-FED-RPF; Caenorhabditis elegans; OTHER	Caenorhabditis elegans	Illumina HiSeq 2000	GEO	SRP026198	mRNA and Ribosome Profiling in Four Nematode Species Traversing a Shared Developmental Transition	SRS449537	20213950	727702200		OTHER	TRANSCRIPTOMIC	other
SRR941632	SRX326668	GSM1192801: DH2_N2_0; Caenorhabditis elegans; RNA-Seq	Caenorhabditis elegans	Illumina HiSeq 2000	GEO	SRP027592	Dampening of expression oscillations by synchronous regulation of a microRNA and its target	SRS463101	20763724	830548960		RNA-Seq	TRANSCRIPTOMIC	cDNA
SRR941633	SRX326669	GSM1192802: DH2_N2_2; Caenorhabditis elegans; RNA-Seq	Caenorhabditis elegans	Illumina HiSeq 2000	GEO	SRP027592	Dampening of expression oscillations by synchronous regulation of a microRNA and its target	SRS463103	18416559	736662360		RNA-Seq	TRANSCRIPTOMIC	cDNA
SRR941634	SRX326670	GSM1192803: DH2_N2_4; Caenorhabditis elegans; RNA-Seq	Caenorhabditis elegans	Illumina HiSeq 2000	GEO	SRP027592	Dampening of expression oscillations by synchronous regulation of a microRNA and its target	SRS463102	28302302	1132092080		RNA-Seq	TRANSCRIPTOMIC	cDNA
SRR941635	SRX326671	GSM1192804: DH2_N2_6; Caenorhabditis elegans; RNA-Seq	Caenorhabditis elegans	Illumina HiSeq 2000	GEO	SRP027592	Dampening of expression oscillations by synchronous regulation of a microRNA and its target	SRS463104	20398035	815921400		RNA-Seq	TRANSCRIPTOMIC	cDNA
SRR941636	SRX326672	GSM1192805: DH2_N2_8; Caenorhabditis elegans; RNA-Seq	Caenorhabditis elegans	Illumina HiSeq 2000	GEO	SRP027592	Dampening of expression oscillations by synchronous regulation of a microRNA and its target	SRS463105	14730141	589205640		RNA-Seq	TRANSCRIPTOMIC	cDNA
SRR941637	SRX326673	GSM1192806: DH2_N2_10; Caenorhabditis elegans; RNA-Seq	Caenorhabditis elegans	Illumina HiSeq 2000	GEO	SRP027592	Dampening of expression oscillations by synchronous regulation of a microRNA and its target	SRS463106	25936137	1037445480		RNA-Seq	TRANSCRIPTOMIC	cDNA
SRR941638	SRX326674	GSM1192807: DH2_N2_12; Caenorhabditis elegans; RNA-Seq	Caenorhabditis elegans	Illumina HiSeq 2000	GEO	SRP027592	Dampening of expression oscillations by synchronous regulation of a microRNA and its target	SRS463107	25803542	1032141680		RNA-Seq	TRANSCRIPTOMIC	cDNA
SRR941639	SRX326675	GSM1192808: DH2_N2_14; Caenorhabditis elegans; RNA-Seq	Caenorhabditis elegans	Illumina HiSeq 2000	GEO	SRP027592	Dampening of expression oscillations by synchronous regulation of a microRNA and its target	SRS463108	22827331	913093240		RNA-Seq	TRANSCRIPTOMIC	cDNA
SRR941640	SRX326676	GSM1192809: DH2_N2_16; Caenorhabditis elegans; RNA-Seq	Caenorhabditis elegans	Illumina HiSeq 2000	GEO	SRP027592	Dampening of expression oscillations by synchronous regulation of a microRNA and its target	SRS463109	13986705	559468200		RNA-Seq	TRANSCRIPTOMIC	cDNA
SRR941641	SRX326677	GSM1192810: DH2_N2_18; Caenorhabditis elegans; RNA-Seq	Caenorhabditis elegans	Illumina HiSeq 2000	GEO	SRP027592	Dampening of expression oscillations by synchronous regulation of a microRNA and its target	SRS463110	12914180	516567200		RNA-Seq	TRANSCRIPTOMIC	cDNA
SRR941642	SRX326678	GSM1192811: DH2_N2_20; Caenorhabditis elegans; RNA-Seq	Caenorhabditis elegans	Illumina HiSeq 2000	GEO	SRP027592	Dampening of expression oscillations by synchronous regulation of a microRNA and its target	SRS463111	17312262	692490480		RNA-Seq	TRANSCRIPTOMIC	cDNA
SRR941643	SRX326679	GSM1192812: DH2_N2_22; Caenorhabditis elegans; RNA-Seq	Caenorhabditis elegans	Illumina HiSeq 2000	GEO	SRP027592	Dampening of expression oscillations by synchronous regulation of a microRNA and its target	SRS463112	16025254	641010160		RNA-Seq	TRANSCRIPTOMIC	cDNA
SRR941644	SRX326680	GSM1192813: DH2_N2_24; Caenorhabditis elegans; RNA-Seq	Caenorhabditis elegans	Illumina HiSeq 2000	GEO	SRP027592	Dampening of expression oscillations by synchronous regulation of a microRNA and its target	SRS463113	15693365	627734600		RNA-Seq	TRANSCRIPTOMIC	cDNA
SRR941645	SRX326681	GSM1192814: DH2_N2_26; Caenorhabditis elegans; RNA-Seq	Caenorhabditis elegans	Illumina HiSeq 2000	GEO	SRP027592	Dampening of expression oscillations by synchronous regulation of a microRNA and its target	SRS463114	16536203	661448120		RNA-Seq	TRANSCRIPTOMIC	cDNA
SRR941646	SRX326682	GSM1192815: DH2_N2_28; Caenorhabditis elegans; RNA-Seq	Caenorhabditis elegans	Illumina HiSeq 2000	GEO	SRP027592	Dampening of expression oscillations by synchronous regulation of a microRNA and its target	SRS463115	24329013	973160520		RNA-Seq	TRANSCRIPTOMIC	cDNA
SRR941647	SRX326683	GSM1192816: DH2_N2_30; Caenorhabditis elegans; RNA-Seq	Caenorhabditis elegans	Illumina HiSeq 2000	GEO	SRP027592	Dampening of expression oscillations by synchronous regulation of a microRNA and its target	SRS463116	30281218	1211248720		RNA-Seq	TRANSCRIPTOMIC	cDNA
SRR941648	SRX326684	GSM1192817: DH2_N2_32; Caenorhabditis elegans; RNA-Seq	Caenorhabditis elegans	Illumina HiSeq 2000	GEO	SRP027592	Dampening of expression oscillations by synchronous regulation of a microRNA and its target	SRS463117	32857087	1314283480		RNA-Seq	TRANSCRIPTOMIC	cDNA
SRR941649	SRX326685	GSM1192818: DH2_N2_34; Caenorhabditis elegans; RNA-Seq	Caenorhabditis elegans	Illumina HiSeq 2000	GEO	SRP027592	Dampening of expression oscillations by synchronous regulation of a microRNA and its target	SRS463118	30069117	1202764680		RNA-Seq	TRANSCRIPTOMIC	cDNA
SRR941650	SRX326686	GSM1192819: DH2_N2_36; Caenorhabditis elegans; RNA-Seq	Caenorhabditis elegans	Illumina HiSeq 2000	GEO	SRP027592	Dampening of expression oscillations by synchronous regulation of a microRNA and its target	SRS463119	38793547	1551741880		RNA-Seq	TRANSCRIPTOMIC	cDNA
SRR941651	SRX326687	GSM1192820: DH2_N2_38; Caenorhabditis elegans; RNA-Seq	Caenorhabditis elegans	Illumina HiSeq 2000	GEO	SRP027592	Dampening of expression oscillations by synchronous regulation of a microRNA and its target	SRS463120	21670093	866803720		RNA-Seq	TRANSCRIPTOMIC	cDNA
SRR941652	SRX326688	GSM1192821: DH3_N2_0; Caenorhabditis elegans; RNA-Seq	Caenorhabditis elegans	Illumina HiSeq 2000	GEO	SRP027592	Dampening of expression oscillations by synchronous regulation of a microRNA and its target	SRS463121	16535060	661402400		RNA-Seq	TRANSCRIPTOMIC	cDNA
SRR941653	SRX326689	GSM1192822: DH3_N2_1_5; Caenorhabditis elegans; RNA-Seq	Caenorhabditis elegans	Illumina HiSeq 2000	GEO	SRP027592	Dampening of expression oscillations by synchronous regulation of a microRNA and its target	SRS463122	19909191	796367640		RNA-Seq	TRANSCRIPTOMIC	cDNA
SRR941654	SRX326690	GSM1192823: DH3_N2_3; Caenorhabditis elegans; RNA-Seq	Caenorhabditis elegans	Illumina HiSeq 2000	GEO	SRP027592	Dampening of expression oscillations by synchronous regulation of a microRNA and its target	SRS463123	28386721	1135468840		RNA-Seq	TRANSCRIPTOMIC	cDNA
SRR941655	SRX326691	GSM1192824: DH3_N2_4_5; Caenorhabditis elegans; RNA-Seq	Caenorhabditis elegans	Illumina HiSeq 2000	GEO	SRP027592	Dampening of expression oscillations by synchronous regulation of a microRNA and its target	SRS463124	36615424	1464616960		RNA-Seq	TRANSCRIPTOMIC	cDNA
SRR941656	SRX326692	GSM1192825: DH3_N2_6; Caenorhabditis elegans; RNA-Seq	Caenorhabditis elegans	Illumina HiSeq 2000	GEO	SRP027592	Dampening of expression oscillations by synchronous regulation of a microRNA and its target	SRS463125	26569349	1062773960		RNA-Seq	TRANSCRIPTOMIC	cDNA
SRR941657	SRX326693	GSM1192826: DH3_N2_7_5; Caenorhabditis elegans; RNA-Seq	Caenorhabditis elegans	Illumina HiSeq 2000	GEO	SRP027592	Dampening of expression oscillations by synchronous regulation of a microRNA and its target	SRS463126	20972527	838901080		RNA-Seq	TRANSCRIPTOMIC	cDNA
SRR941658	SRX326694	GSM1192827: DH3_N2_9; Caenorhabditis elegans; RNA-Seq	Caenorhabditis elegans	Illumina HiSeq 2000	GEO	SRP027592	Dampening of expression oscillations by synchronous regulation of a microRNA and its target	SRS463127	24428904	977156160		RNA-Seq	TRANSCRIPTOMIC	cDNA
SRR941659	SRX326695	GSM1192828: DH3_N2_10_5; Caenorhabditis elegans; RNA-Seq	Caenorhabditis elegans	Illumina HiSeq 2000	GEO	SRP027592	Dampening of expression oscillations by synchronous regulation of a microRNA and its target	SRS463128	32139880	1285595200		RNA-Seq	TRANSCRIPTOMIC	cDNA
SRR941660	SRX326696	GSM1192829: DH3_N2_12; Caenorhabditis elegans; RNA-Seq	Caenorhabditis elegans	Illumina HiSeq 2000	GEO	SRP027592	Dampening of expression oscillations by synchronous regulation of a microRNA and its target	SRS463129	23612504	944500160		RNA-Seq	TRANSCRIPTOMIC	cDNA
SRR941661	SRX326697	GSM1192830: DH3_N2_13_5; Caenorhabditis elegans; RNA-Seq	Caenorhabditis elegans	Illumina HiSeq 2000	GEO	SRP027592	Dampening of expression oscillations by synchronous regulation of a microRNA and its target	SRS463130	23369923	934796920		RNA-Seq	TRANSCRIPTOMIC	cDNA
SRR941662	SRX326698	GSM1192831: DH3_N2_15; Caenorhabditis elegans; RNA-Seq	Caenorhabditis elegans	Illumina HiSeq 2000	GEO	SRP027592	Dampening of expression oscillations by synchronous regulation of a microRNA and its target	SRS463131	24415458	976618320		RNA-Seq	TRANSCRIPTOMIC	cDNA
SRR941663	SRX326699	GSM1192832: DH3_N2_16_5; Caenorhabditis elegans; RNA-Seq	Caenorhabditis elegans	Illumina HiSeq 2000	GEO	SRP027592	Dampening of expression oscillations by synchronous regulation of a microRNA and its target	SRS463132	29669266	1186770640		RNA-Seq	TRANSCRIPTOMIC	cDNA
SRR941664	SRX326700	GSM1192833: DH3_N2_18; Caenorhabditis elegans; RNA-Seq	Caenorhabditis elegans	Illumina HiSeq 2000	GEO	SRP027592	Dampening of expression oscillations by synchronous regulation of a microRNA and its target	SRS463133	22656190	906247600		RNA-Seq	TRANSCRIPTOMIC	cDNA
SRR941665	SRX326701	GSM1192834: DH3_N2_19_5; Caenorhabditis elegans; RNA-Seq	Caenorhabditis elegans	Illumina HiSeq 2000	GEO	SRP027592	Dampening of expression oscillations by synchronous regulation of a microRNA and its target	SRS463134	20893130	835725200		RNA-Seq	TRANSCRIPTOMIC	cDNA
SRR941666	SRX326702	GSM1192835: DH3_N2_21; Caenorhabditis elegans; RNA-Seq	Caenorhabditis elegans	Illumina HiSeq 2000	GEO	SRP027592	Dampening of expression oscillations by synchronous regulation of a microRNA and its target	SRS463135	28067526	1122701040		RNA-Seq	TRANSCRIPTOMIC	cDNA
SRR941667	SRX326703	GSM1192836: DH3_N2_22_5; Caenorhabditis elegans; RNA-Seq	Caenorhabditis elegans	Illumina HiSeq 2000	GEO	SRP027592	Dampening of expression oscillations by synchronous regulation of a microRNA and its target	SRS463136	29210914	1168436560		RNA-Seq	TRANSCRIPTOMIC	cDNA
SRR941668	SRX326704	GSM1192837: DH3_N2_24; Caenorhabditis elegans; RNA-Seq	Caenorhabditis elegans	Illumina HiSeq 2000	GEO	SRP027592	Dampening of expression oscillations by synchronous regulation of a microRNA and its target	SRS463137	22927154	917086160		RNA-Seq	TRANSCRIPTOMIC	cDNA
SRR941669	SRX326705	GSM1192838: DH3_N2_25_5; Caenorhabditis elegans; RNA-Seq	Caenorhabditis elegans	Illumina HiSeq 2000	GEO	SRP027592	Dampening of expression oscillations by synchronous regulation of a microRNA and its target	SRS463138	29930484	1197219360		RNA-Seq	TRANSCRIPTOMIC	cDNA
SRR941670	SRX326706	GSM1192839: DH3_N2_27; Caenorhabditis elegans; RNA-Seq	Caenorhabditis elegans	Illumina HiSeq 2000	GEO	SRP027592	Dampening of expression oscillations by synchronous regulation of a microRNA and its target	SRS463139	25415952	1016638080		RNA-Seq	TRANSCRIPTOMIC	cDNA
SRR941671	SRX326707	GSM1192840: DH3_N2_28_5; Caenorhabditis elegans; RNA-Seq	Caenorhabditis elegans	Illumina HiSeq 2000	GEO	SRP027592	Dampening of expression oscillations by synchronous regulation of a microRNA and its target	SRS463140	26881473	1075258920		RNA-Seq	TRANSCRIPTOMIC	cDNA
SRR941672	SRX326708	GSM1192841: DH4_lin4_0; Caenorhabditis elegans; RNA-Seq	Caenorhabditis elegans	Illumina HiSeq 2000	GEO	SRP027592	Dampening of expression oscillations by synchronous regulation of a microRNA and its target	SRS463141		562.22	1	21409088	856363520		RNA-Seq	TRANSCRIPTOMIC	cDNA
SRR941673	SRX326709	GSM1192842: DH4_lin4_2; Caenorhabditis elegans; RNA-Seq	Caenorhabditis elegans	Illumina HiSeq 2000	GEO	SRP027592	Dampening of expression oscillations by synchronous regulation of a microRNA and its target	SRS463142		799.77	1	30481412	1219256480		RNA-Seq	TRANSCRIPTOMIC	cDNA
SRR941674	SRX326710	GSM1192843: DH4_lin4_4; Caenorhabditis elegans; RNA-Seq	Caenorhabditis elegans	Illumina HiSeq 2000	GEO	SRP027592	Dampening of expression oscillations by synchronous regulation of a microRNA and its target	SRS463143		751.89	1	28563559	1142542360		RNA-Seq	TRANSCRIPTOMIC	cDNA
SRR941675	SRX326711	GSM1192844: DH4_lin4_6; Caenorhabditis elegans; RNA-Seq	Caenorhabditis elegans	Illumina HiSeq 2000	GEO	SRP027592	Dampening of expression oscillations by synchronous regulation of a microRNA and its target	SRS463144		687.21	1	26263304	1050532160		RNA-Seq	TRANSCRIPTOMIC	cDNA
SRR941676	SRX326712	GSM1192845: DH4_lin4_8; Caenorhabditis elegans; RNA-Seq	Caenorhabditis elegans	Illumina HiSeq 2000	GEO	SRP027592	Dampening of expression oscillations by synchronous regulation of a microRNA and its target	SRS463145		677.87	1	25799882	1031995280		RNA-Seq	TRANSCRIPTOMIC	cDNA
SRR941677	SRX326713	GSM1192846: DH4_lin4_10; Caenorhabditis elegans; RNA-Seq	Caenorhabditis elegans	Illumina HiSeq 2000	GEO	SRP027592	Dampening of expression oscillations by synchronous regulation of a microRNA and its target	SRS463146		678.79	1	25799604	1031984160		RNA-Seq	TRANSCRIPTOMIC	cDNA
SRR941678	SRX326714	GSM1192847: DH4_lin4_12; Caenorhabditis elegans; RNA-Seq	Caenorhabditis elegans	Illumina HiSeq 2000	GEO	SRP027592	Dampening of expression oscillations by synchronous regulation of a microRNA and its target	SRS463147		637.95	1	24197399	967895960		RNA-Seq	TRANSCRIPTOMIC	cDNA
SRR941679	SRX326715	GSM1192848: DH4_lin4_14; Caenorhabditis elegans; RNA-Seq	Caenorhabditis elegans	Illumina HiSeq 2000	GEO	SRP027592	Dampening of expression oscillations by synchronous regulation of a microRNA and its target	SRS463148		908.97	1	34490151	1379606040		RNA-Seq	TRANSCRIPTOMIC	cDNA
SRR941680	SRX326716	GSM1192849: DH4_lin4_16; Caenorhabditis elegans; RNA-Seq	Caenorhabditis elegans	Illumina HiSeq 2000	GEO	SRP027592	Dampening of expression oscillations by synchronous regulation of a microRNA and its target	SRS463149		869.15	1	32861628	1314465120		RNA-Seq	TRANSCRIPTOMIC	cDNA
SRR941681	SRX326717	GSM1192850: DH4_lin4_18; Caenorhabditis elegans; RNA-Seq	Caenorhabditis elegans	Illumina HiSeq 2000	GEO	SRP027592	Dampening of expression oscillations by synchronous regulation of a microRNA and its target	SRS463150		981.53	1	37047075	1481883000		RNA-Seq	TRANSCRIPTOMIC	cDNA
SRR941682	SRX326718	GSM1192851: DH4_lin4_20; Caenorhabditis elegans; RNA-Seq	Caenorhabditis elegans	Illumina HiSeq 2000	GEO	SRP027592	Dampening of expression oscillations by synchronous regulation of a microRNA and its target	SRS463151		904.87	1	34093355	1363734200		RNA-Seq	TRANSCRIPTOMIC	cDNA
SRR941683	SRX326719	GSM1192852: DH4_lin4_22; Caenorhabditis elegans; RNA-Seq	Caenorhabditis elegans	Illumina HiSeq 2000	GEO	SRP027592	Dampening of expression oscillations by synchronous regulation of a microRNA and its target	SRS463152		829.85	1	31338735	1253549400		RNA-Seq	TRANSCRIPTOMIC	cDNA
SRR941684	SRX326720	GSM1192853: DH4_lin4_24; Caenorhabditis elegans; RNA-Seq	Caenorhabditis elegans	Illumina HiSeq 2000	GEO	SRP027592	Dampening of expression oscillations by synchronous regulation of a microRNA and its target	SRS463153		481.12	1	17993961	719758440		RNA-Seq	TRANSCRIPTOMIC	cDNA
SRR941685	SRX326721	GSM1192854: DH4_lin4_26; Caenorhabditis elegans; RNA-Seq	Caenorhabditis elegans	Illumina HiSeq 2000	GEO	SRP027592	Dampening of expression oscillations by synchronous regulation of a microRNA and its target	SRS463154		909.25	1	34659006	1386360240		RNA-Seq	TRANSCRIPTOMIC	cDNA
SRR941686	SRX326722	GSM1192855: DH4_lin4_28; Caenorhabditis elegans; RNA-Seq	Caenorhabditis elegans	Illumina HiSeq 2000	GEO	SRP027592	Dampening of expression oscillations by synchronous regulation of a microRNA and its target	SRS463155		904.22	1	34228398	1369135920		RNA-Seq	TRANSCRIPTOMIC	cDNA
SRR941687	SRX326723	GSM1192856: DH4_lin4_30; Caenorhabditis elegans; RNA-Seq	Caenorhabditis elegans	Illumina HiSeq 2000	GEO	SRP027592	Dampening of expression oscillations by synchronous regulation of a microRNA and its target	SRS463156		696.62	1	26361069	1054442760		RNA-Seq	TRANSCRIPTOMIC	cDNA
SRR941688	SRX326724	GSM1192857: DH4_lin4_32; Caenorhabditis elegans; RNA-Seq	Caenorhabditis elegans	Illumina HiSeq 2000	GEO	SRP027592	Dampening of expression oscillations by synchronous regulation of a microRNA and its target	SRS463157		711.88	1	26971871	1078874840		RNA-Seq	TRANSCRIPTOMIC	cDNA
SRR941689	SRX326725	GSM1192858: DH4_lin4_34; Caenorhabditis elegans; RNA-Seq	Caenorhabditis elegans	Illumina HiSeq 2000	GEO	SRP027592	Dampening of expression oscillations by synchronous regulation of a microRNA and its target	SRS463158		756.94	1	28604818	1144192720		RNA-Seq	TRANSCRIPTOMIC	cDNA
SRR941690	SRX326726	GSM1192859: DH4_lin4_36; Caenorhabditis elegans; RNA-Seq	Caenorhabditis elegans	Illumina HiSeq 2000	GEO	SRP027592	Dampening of expression oscillations by synchronous regulation of a microRNA and its target	SRS463159		982.22	1	37272449	1490897960		RNA-Seq	TRANSCRIPTOMIC	cDNA
SRR941691	SRX326727	GSM1192860: DH4_lin4_38; Caenorhabditis elegans; RNA-Seq	Caenorhabditis elegans	Illumina HiSeq 2000	GEO	SRP027592	Dampening of expression oscillations by synchronous regulation of a microRNA and its target	SRS463160		805.58	1	30389834	1215593360		RNA-Seq	TRANSCRIPTOMIC	cDNA
SRR941692	SRX326728	GSM1192861: DH4_lin4_40; Caenorhabditis elegans; RNA-Seq	Caenorhabditis elegans	Illumina HiSeq 2000	GEO	SRP027592	Dampening of expression oscillations by synchronous regulation of a microRNA and its target	SRS463161		973.61	1	36948637	1477945480		RNA-Seq	TRANSCRIPTOMIC	cDNA
SRR941693	SRX326729	GSM1192862: DH4_lin4_42; Caenorhabditis elegans; RNA-Seq	Caenorhabditis elegans	Illumina HiSeq 2000	GEO	SRP027592	Dampening of expression oscillations by synchronous regulation of a microRNA and its target	SRS463162		875.71	1	33142550	1325702000		RNA-Seq	TRANSCRIPTOMIC	cDNA
SRR941694	SRX326730	GSM1192863: DH4_lin4_44; Caenorhabditis elegans; RNA-Seq	Caenorhabditis elegans	Illumina HiSeq 2000	GEO	SRP027592	Dampening of expression oscillations by synchronous regulation of a microRNA and its target	SRS463163		890.7	1	33650541	1346021640		RNA-Seq	TRANSCRIPTOMIC	cDNA
SRR941695	SRX326731	GSM1192864: DH4_lin4_46; Caenorhabditis elegans; RNA-Seq	Caenorhabditis elegans	Illumina HiSeq 2000	GEO	SRP027592	Dampening of expression oscillations by synchronous regulation of a microRNA and its target	SRS463164		728.38	1	27469161	1098766440		RNA-Seq	TRANSCRIPTOMIC	cDNA
SRR941696	SRX326732	GSM1192865: DH4_lin4_48; Caenorhabditis elegans; RNA-Seq	Caenorhabditis elegans	Illumina HiSeq 2000	GEO	SRP027592	Dampening of expression oscillations by synchronous regulation of a microRNA and its target	SRS463165		816.97	1	30942091	1237683640		RNA-Seq	TRANSCRIPTOMIC	cDNA
SRR941697	SRX326733	GSM1192866: DH5_N2_38; Caenorhabditis elegans; RNA-Seq	Caenorhabditis elegans	Illumina HiSeq 2000	GEO	SRP027592	Dampening of expression oscillations by synchronous regulation of a microRNA and its target	SRS463166	32790527	1311621080		RNA-Seq	TRANSCRIPTOMIC	cDNA
SRR941698	SRX326734	GSM1192867: DH5_N2_40; Caenorhabditis elegans; RNA-Seq	Caenorhabditis elegans	Illumina HiSeq 2000	GEO	SRP027592	Dampening of expression oscillations by synchronous regulation of a microRNA and its target	SRS463167	37097630	1483905200		RNA-Seq	TRANSCRIPTOMIC	cDNA
SRR941699	SRX326735	GSM1192868: DH5_N2_42; Caenorhabditis elegans; RNA-Seq	Caenorhabditis elegans	Illumina HiSeq 2000	GEO	SRP027592	Dampening of expression oscillations by synchronous regulation of a microRNA and its target	SRS463168	30958939	1238357560		RNA-Seq	TRANSCRIPTOMIC	cDNA
SRR941700	SRX326736	GSM1192869: DH5_N2_44; Caenorhabditis elegans; RNA-Seq	Caenorhabditis elegans	Illumina HiSeq 2000	GEO	SRP027592	Dampening of expression oscillations by synchronous regulation of a microRNA and its target	SRS463169	31145872	1245834880		RNA-Seq	TRANSCRIPTOMIC	cDNA
SRR941701	SRX326737	GSM1192870: DH5_N2_46; Caenorhabditis elegans; RNA-Seq	Caenorhabditis elegans	Illumina HiSeq 2000	GEO	SRP027592	Dampening of expression oscillations by synchronous regulation of a microRNA and its target	SRS463170	31094914	1243796560		RNA-Seq	TRANSCRIPTOMIC	cDNA
SRR941702	SRX326738	GSM1192871: DH5_N2_48; Caenorhabditis elegans; RNA-Seq	Caenorhabditis elegans	Illumina HiSeq 2000	GEO	SRP027592	Dampening of expression oscillations by synchronous regulation of a microRNA and its target	SRS463171	37542343	1501693720		RNA-Seq	TRANSCRIPTOMIC	cDNA
SRR947194 SRR947195	SRX330989	GSM1200345: RNAseq L3 KLE2 het Rep1; Caenorhabditis elegans; RNA-Seq	Caenorhabditis elegans	Illumina HiSeq 2000	GEO	SRP020357	Genome-wide distribution of the three condensin complexes in C. elegans	SRS466568		461.93	2	15383999	784583949		RNA-Seq	TRANSCRIPTOMIC	cDNA
SRR947196 SRR947197	SRX330990	GSM1200346: RNAseq L3 KLE2 het Rep2; Caenorhabditis elegans; RNA-Seq	Caenorhabditis elegans	Illumina HiSeq 2000	GEO	SRP020357	Genome-wide distribution of the three condensin complexes in C. elegans	SRS466569		646.05	2	20580311	1049595861		RNA-Seq	TRANSCRIPTOMIC	cDNA
SRR947198	SRX330991	GSM1200347: RNAseq L3 KLE2 het Rep3; Caenorhabditis elegans; RNA-Seq	Caenorhabditis elegans	Illumina HiSeq 2000	GEO	SRP020357	Genome-wide distribution of the three condensin complexes in C. elegans	SRS466570		453.57	1	14158077	722061927		RNA-Seq	TRANSCRIPTOMIC	cDNA
SRR947199 SRR947200	SRX330992	GSM1200348: RNAseq L3 KLE2 homo Rep1; Caenorhabditis elegans; RNA-Seq	Caenorhabditis elegans	Illumina HiSeq 2000	GEO	SRP020357	Genome-wide distribution of the three condensin complexes in C. elegans	SRS466571		331.31	2	11062542	564189642		RNA-Seq	TRANSCRIPTOMIC	cDNA
SRR947201 SRR947202	SRX330993	GSM1200349: RNAseq L3 KLE2 homo Rep2; Caenorhabditis elegans; RNA-Seq	Caenorhabditis elegans	Illumina HiSeq 2000	GEO	SRP020357	Genome-wide distribution of the three condensin complexes in C. elegans	SRS466572		535.89	2	17155255	874918005		RNA-Seq	TRANSCRIPTOMIC	cDNA
SRR947203	SRX330994	GSM1200350: RNAseq L3 KLE2 homo Rep3; Caenorhabditis elegans; RNA-Seq	Caenorhabditis elegans	Illumina HiSeq 2000	GEO	SRP020357	Genome-wide distribution of the three condensin complexes in C. elegans	SRS466573		577.04	1	18093120	922749120		RNA-Seq	TRANSCRIPTOMIC	cDNA
SRR949218	SRX332740	GSM1204583: Nr101 NA rep1; Caenorhabditis elegans; RNA-Seq	Caenorhabditis elegans	Illumina HiSeq 2000	GEO	SRP028602	Deep sequencing of endogenous mRNA from Caenorhabditis elegans in the presence and absence of 1-methylnicotinamide (MNA) and nicotinic acid (NA)	SRS468177		1248.64	1	37618954	1880947700		RNA-Seq	TRANSCRIPTOMIC	cDNA
SRR949219	SRX332741	GSM1204584: Nr102 H20 rep1; Caenorhabditis elegans; RNA-Seq	Caenorhabditis elegans	Illumina HiSeq 2000	GEO	SRP028602	Deep sequencing of endogenous mRNA from Caenorhabditis elegans in the presence and absence of 1-methylnicotinamide (MNA) and nicotinic acid (NA)	SRS468178		965.68	1	29242877	1462143850		RNA-Seq	TRANSCRIPTOMIC	cDNA
SRR949220	SRX332742	GSM1204585: Nr103 MNA rep1; Caenorhabditis elegans; RNA-Seq	Caenorhabditis elegans	Illumina HiSeq 2000	GEO	SRP028602	Deep sequencing of endogenous mRNA from Caenorhabditis elegans in the presence and absence of 1-methylnicotinamide (MNA) and nicotinic acid (NA)	SRS468179		1026.49	1	31072409	1553620450		RNA-Seq	TRANSCRIPTOMIC	cDNA
SRR949221	SRX332743	GSM1204586: Nr104 NA rep2; Caenorhabditis elegans; RNA-Seq	Caenorhabditis elegans	Illumina HiSeq 2000	GEO	SRP028602	Deep sequencing of endogenous mRNA from Caenorhabditis elegans in the presence and absence of 1-methylnicotinamide (MNA) and nicotinic acid (NA)	SRS468181		804.93	1	24334565	1216728250		RNA-Seq	TRANSCRIPTOMIC	cDNA
SRR949222	SRX332744	GSM1204587: Nr105 H20 rep2; Caenorhabditis elegans; RNA-Seq	Caenorhabditis elegans	Illumina HiSeq 2000	GEO	SRP028602	Deep sequencing of endogenous mRNA from Caenorhabditis elegans in the presence and absence of 1-methylnicotinamide (MNA) and nicotinic acid (NA)	SRS468180		1061.62	1	32164028	1608201400		RNA-Seq	TRANSCRIPTOMIC	cDNA
SRR949223	SRX332745	GSM1204588: Nr106 MNA rep2; Caenorhabditis elegans; RNA-Seq	Caenorhabditis elegans	Illumina HiSeq 2000	GEO	SRP028602	Deep sequencing of endogenous mRNA from Caenorhabditis elegans in the presence and absence of 1-methylnicotinamide (MNA) and nicotinic acid (NA)	SRS468182		1213.71	1	36607766	1830388300		RNA-Seq	TRANSCRIPTOMIC	cDNA
SRR949224	SRX332746	GSM1204589: Nr107 NA rep3; Caenorhabditis elegans; RNA-Seq	Caenorhabditis elegans	Illumina HiSeq 2000	GEO	SRP028602	Deep sequencing of endogenous mRNA from Caenorhabditis elegans in the presence and absence of 1-methylnicotinamide (MNA) and nicotinic acid (NA)	SRS468183		1347.91	1	40892274	2044613700		RNA-Seq	TRANSCRIPTOMIC	cDNA
SRR949225	SRX332747	GSM1204590: Nr108 H20 rep3; Caenorhabditis elegans; RNA-Seq	Caenorhabditis elegans	Illumina HiSeq 2000	GEO	SRP028602	Deep sequencing of endogenous mRNA from Caenorhabditis elegans in the presence and absence of 1-methylnicotinamide (MNA) and nicotinic acid (NA)	SRS468184		1151.22	1	34872760	1743638000		RNA-Seq	TRANSCRIPTOMIC	cDNA
SRR949226	SRX332748	GSM1204591: Nr109 MNA rep3; Caenorhabditis elegans; RNA-Seq	Caenorhabditis elegans	Illumina HiSeq 2000	GEO	SRP028602	Deep sequencing of endogenous mRNA from Caenorhabditis elegans in the presence and absence of 1-methylnicotinamide (MNA) and nicotinic acid (NA)	SRS468185		1187.8	1	36096267	1804813350		RNA-Seq	TRANSCRIPTOMIC	cDNA
SRR949531	SRX333008	GSM1204752: WT males 20°C mRNA; Caenorhabditis elegans; RNA-Seq	Caenorhabditis elegans	Illumina HiSeq 2000	GEO	SRP028611	Argonautes promote male fertility and provide a paternal memory of germline gene expression in C. elegans	SRS468427	32784861	1180254996		RNA-Seq	TRANSCRIPTOMIC	cDNA
SRR949532	SRX333009	GSM1204753: WT males 25°C mRNA; Caenorhabditis elegans; RNA-Seq	Caenorhabditis elegans	Illumina HiSeq 2000	GEO	SRP028611	Argonautes promote male fertility and provide a paternal memory of germline gene expression in C. elegans	SRS468428	29951162	1078241832		RNA-Seq	TRANSCRIPTOMIC	cDNA
SRR949533	SRX333010	GSM1204754: alg-3/4 males 20°C mRNA; Caenorhabditis elegans; RNA-Seq	Caenorhabditis elegans	Illumina HiSeq 2000	GEO	SRP028611	Argonautes promote male fertility and provide a paternal memory of germline gene expression in C. elegans	SRS468430		446.86	1	18684112	672628032		RNA-Seq	TRANSCRIPTOMIC	cDNA
SRR949534	SRX333011	GSM1204755: alg-3/4 males 25°C mRNA; Caenorhabditis elegans; RNA-Seq	Caenorhabditis elegans	Illumina HiSeq 2000	GEO	SRP028611	Argonautes promote male fertility and provide a paternal memory of germline gene expression in C. elegans	SRS468429		635.93	1	27730678	998304408		RNA-Seq	TRANSCRIPTOMIC	cDNA
SRR953117	SRX335720	C. elegans N2 L1 polyA RNA-seq	Caenorhabditis elegans	Illumina HiSeq 2000	Peking University	SRP028863	Profiling of RNA editing in Caenorhabditis elegans	SRS470743	57236939	11447387800		RNA-Seq	TRANSCRIPTOMIC	unspecified
SRR953118	SRX335721	C. elegans N2 L2~3 polyA RNA-seq	Caenorhabditis elegans	Illumina HiSeq 2000	Peking University	SRP028863	Profiling of RNA editing in Caenorhabditis elegans	SRS470744	55206405	11041281000		RNA-Seq	TRANSCRIPTOMIC	unspecified
SRR953119	SRX335722	C. elegans N2 L4 polyA RNA-seq	Caenorhabditis elegans	Illumina HiSeq 2000	Peking University	SRP028863	Profiling of RNA editing in Caenorhabditis elegans	SRS470745	55089686	11017937200		RNA-Seq	TRANSCRIPTOMIC	unspecified
SRR953120	SRX335723	C. elegans N2 Day1 adult polyA RNA-seq	Caenorhabditis elegans	Illumina HiSeq 2000	Peking University	SRP028863	Profiling of RNA editing in Caenorhabditis elegans	SRS470746	55763048	11152609600		RNA-Seq	TRANSCRIPTOMIC	unspecified
SRR953121	SRX335724	C. elegans N2 Day8 adult polyA RNA-seq	Caenorhabditis elegans	Illumina HiSeq 2000	Peking University	SRP028863	Profiling of RNA editing in Caenorhabditis elegans	SRS470747	58547396	11709479200		RNA-Seq	TRANSCRIPTOMIC	unspecified
SRR953122	SRX335725	C. elegans BB2 (adr-1-/-) embryo polyA RNA-seq	Caenorhabditis elegans	Illumina HiSeq 2000	Peking University	SRP028863	Profiling of RNA editing in Caenorhabditis elegans	SRS470748		7079.89	1	55407700	11081540000		RNA-Seq	TRANSCRIPTOMIC	unspecified
SRR953123	SRX335726	C. elegans BB2 (adr-1-/-) L1 polyA RNA-seq	Caenorhabditis elegans	Illumina HiSeq 2000	Peking University	SRP028863	Profiling of RNA editing in Caenorhabditis elegans	SRS470749		7437.96	1	61374457	11047402260		RNA-Seq	TRANSCRIPTOMIC	unspecified
SRR953124	SRX335727	C. elegans BB2 (adr-1-/-) L4 polyA RNA-seq	Caenorhabditis elegans	Illumina HiSeq 2000	Peking University	SRP028863	Profiling of RNA editing in Caenorhabditis elegans	SRS470750		7331.51	1	58488606	11697721200		RNA-Seq	TRANSCRIPTOMIC	unspecified
SRR953125	SRX335728	C. elegans BB2 (adr-1-/-) Day1 adult polyA RNA-seq	Caenorhabditis elegans	Illumina HiSeq 2000	Peking University	SRP028863	Profiling of RNA editing in Caenorhabditis elegans	SRS470751		7571.68	1	58319935	11663987000		RNA-Seq	TRANSCRIPTOMIC	unspecified
SRR953126	SRX335729	C. elegans BB3 (adr-2-/-) embryo polyA RNA-seq	Caenorhabditis elegans	Illumina HiSeq 2000	Peking University	SRP028863	Profiling of RNA editing in Caenorhabditis elegans	SRS470752		7126.44	1	56900370	11380074000		RNA-Seq	TRANSCRIPTOMIC	unspecified
SRR953127	SRX335730	C. elegans BB3 (adr-2-/-) L1 polyA RNA-seq	Caenorhabditis elegans	Illumina HiSeq 2000	Peking University	SRP028863	Profiling of RNA editing in Caenorhabditis elegans	SRS470753		7884.99	1	64860192	11674834560		RNA-Seq	TRANSCRIPTOMIC	unspecified
SRR953128	SRX335731	C. elegans BB3 (adr-2-/-) L4 polyA RNA-seq	Caenorhabditis elegans	Illumina HiSeq 2000	Peking University	SRP028863	Profiling of RNA editing in Caenorhabditis elegans	SRS470754		7022.55	1	56004565	11200913000		RNA-Seq	TRANSCRIPTOMIC	unspecified
SRR953129	SRX335732	C. elegans BB3 (adr-2-/-) Day1 adult polyA RNA-seq	Caenorhabditis elegans	Illumina HiSeq 2000	Peking University	SRP028863	Profiling of RNA editing in Caenorhabditis elegans	SRS470755		7736.4	1	58704248	11740849600		RNA-Seq	TRANSCRIPTOMIC	unspecified
SRR953130	SRX335733	C. elegans BB4 (adr-1-/-;adr-2-/-) embryo polyA RNA-seq	Caenorhabditis elegans	Illumina HiSeq 2000	Peking University	SRP028863	Profiling of RNA editing in Caenorhabditis elegans	SRS470756		7156.79	1	57326625	11465325000		RNA-Seq	TRANSCRIPTOMIC	unspecified
SRR953131	SRX335734	C. elegans BB4 (adr-1-/-;adr-2-/-) L1 polyA RNA-seq	Caenorhabditis elegans	Illumina HiSeq 2000	Peking University	SRP028863	Profiling of RNA editing in Caenorhabditis elegans	SRS470757		7635.2	1	63041961	11347552980		RNA-Seq	TRANSCRIPTOMIC	unspecified
SRR953132	SRX335735	C. elegans BB4 (adr-1-/-;adr-2-/-) L4 polyA RNA-seq	Caenorhabditis elegans	Illumina HiSeq 2000	Peking University	SRP028863	Profiling of RNA editing in Caenorhabditis elegans	SRS470758		7083.7	1	57592182	11518436400		RNA-Seq	TRANSCRIPTOMIC	unspecified
SRR953133	SRX335736	C. elegans BB4 (adr-1-/-;adr-2-/-) Day1 adult polyA RNA-seq	Caenorhabditis elegans	Illumina HiSeq 2000	Peking University	SRP028863	Profiling of RNA editing in Caenorhabditis elegans	SRS470759		7311.11	1	56244723	11248944600		RNA-Seq	TRANSCRIPTOMIC	unspecified
SRR953377	SRX336050	GSM1210539: WT_CSR-1_Rep1; Caenorhabditis elegans; RNA-Seq	Caenorhabditis elegans	Illumina HiSeq 2000	GEO	SRP028875	Global effects of the CSR-1 RNA interference pathway on transcriptional landscape	SRS471063	29212647	1489844997		RNA-Seq	TRANSCRIPTOMIC	cDNA
SRR953378	SRX336051	GSM1210540: WT_CSR-1_Rep2; Caenorhabditis elegans; RNA-Seq	Caenorhabditis elegans	Illumina HiSeq 2000	GEO	SRP028875	Global effects of the CSR-1 RNA interference pathway on transcriptional landscape	SRS471064	55611224	2836172424		RNA-Seq	TRANSCRIPTOMIC	cDNA
SRR953379	SRX336052	GSM1210541: Mut_CSR-1_Rep1; Caenorhabditis elegans; RNA-Seq	Caenorhabditis elegans	Illumina HiSeq 2000	GEO	SRP028875	Global effects of the CSR-1 RNA interference pathway on transcriptional landscape	SRS471065		1654.49	1	54672236	2788284036		RNA-Seq	TRANSCRIPTOMIC	cDNA
SRR953380	SRX336053	GSM1210542: Mut_CSR-1_Rep2; Caenorhabditis elegans; RNA-Seq	Caenorhabditis elegans	Illumina HiSeq 2000	GEO	SRP028875	Global effects of the CSR-1 RNA interference pathway on transcriptional landscape	SRS471066		1648.21	1	46983145	2396140395		RNA-Seq	TRANSCRIPTOMIC	cDNA
SRR953381	SRX336054	GSM1210543: WT_DRH-3_Rep1; Caenorhabditis elegans; RNA-Seq	Caenorhabditis elegans	Illumina HiSeq 2000	GEO	SRP028875	Global effects of the CSR-1 RNA interference pathway on transcriptional landscape	SRS471067	35991911	1835587461		RNA-Seq	TRANSCRIPTOMIC	cDNA
SRR953382	SRX336055	GSM1210544: WT_DRH-3_Rep2; Caenorhabditis elegans; RNA-Seq	Caenorhabditis elegans	Illumina HiSeq 2000	GEO	SRP028875	Global effects of the CSR-1 RNA interference pathway on transcriptional landscape	SRS471068	84238416	4296159216		RNA-Seq	TRANSCRIPTOMIC	cDNA
SRR953383	SRX336056	GSM1210545: Mut_DRH-3_Rep1; Caenorhabditis elegans; RNA-Seq	Caenorhabditis elegans	Illumina HiSeq 2000	GEO	SRP028875	Global effects of the CSR-1 RNA interference pathway on transcriptional landscape	SRS471069		1041.47	1	34277861	1748170911		RNA-Seq	TRANSCRIPTOMIC	cDNA
SRR953384	SRX336057	GSM1210546: Mut_DRH-3_Rep2; Caenorhabditis elegans; RNA-Seq	Caenorhabditis elegans	Illumina HiSeq 2000	GEO	SRP028875	Global effects of the CSR-1 RNA interference pathway on transcriptional landscape	SRS471070		1359.19	1	38644232	1970855832		RNA-Seq	TRANSCRIPTOMIC	cDNA
SRR962090	SRX343159	GSM1221016: 1_cell; Caenorhabditis elegans; RNA-Seq	Caenorhabditis elegans	Illumina HiSeq 2000	GEO	SRP029448	Spatiotemporal embryonic transcriptomics reveals the evolutionary history of the endoderm germ layer	SRS475726		67.51	1	2814084	98492940		RNA-Seq	TRANSCRIPTOMIC	cDNA
SRR962091	SRX343160	GSM1221017: 2_cell; Caenorhabditis elegans; RNA-Seq	Caenorhabditis elegans	Illumina HiSeq 2000	GEO	SRP029448	Spatiotemporal embryonic transcriptomics reveals the evolutionary history of the endoderm germ layer	SRS475727		57.71	1	2413635	84477225		RNA-Seq	TRANSCRIPTOMIC	cDNA
SRR962092	SRX343161	GSM1221018: mpfc_010; Caenorhabditis elegans; RNA-Seq	Caenorhabditis elegans	Illumina HiSeq 2000	GEO	SRP029448	Spatiotemporal embryonic transcriptomics reveals the evolutionary history of the endoderm germ layer	SRS475728		80.02	1	3306579	115730265		RNA-Seq	TRANSCRIPTOMIC	cDNA
SRR962093	SRX343162	GSM1221019: mpfc_020; Caenorhabditis elegans; RNA-Seq	Caenorhabditis elegans	Illumina HiSeq 2000	GEO	SRP029448	Spatiotemporal embryonic transcriptomics reveals the evolutionary history of the endoderm germ layer	SRS475729		150.6	1	6042070	211472450		RNA-Seq	TRANSCRIPTOMIC	cDNA
SRR962094	SRX343163	GSM1221020: mpfc_040; Caenorhabditis elegans; RNA-Seq	Caenorhabditis elegans	Illumina HiSeq 2000	GEO	SRP029448	Spatiotemporal embryonic transcriptomics reveals the evolutionary history of the endoderm germ layer	SRS475730		71.98	1	3021630	105757050		RNA-Seq	TRANSCRIPTOMIC	cDNA
SRR962095	SRX343164	GSM1221021: mpfc_050; Caenorhabditis elegans; RNA-Seq	Caenorhabditis elegans	Illumina HiSeq 2000	GEO	SRP029448	Spatiotemporal embryonic transcriptomics reveals the evolutionary history of the endoderm germ layer	SRS475731		48.75	1	2024565	70859775		RNA-Seq	TRANSCRIPTOMIC	cDNA
SRR962096	SRX343165	GSM1221022: mpfc_060; Caenorhabditis elegans; RNA-Seq	Caenorhabditis elegans	Illumina HiSeq 2000	GEO	SRP029448	Spatiotemporal embryonic transcriptomics reveals the evolutionary history of the endoderm germ layer	SRS475732		51.54	1	2149369	75227915		RNA-Seq	TRANSCRIPTOMIC	cDNA
SRR962097	SRX343166	GSM1221023: mpfc_070; Caenorhabditis elegans; RNA-Seq	Caenorhabditis elegans	Illumina HiSeq 2000	GEO	SRP029448	Spatiotemporal embryonic transcriptomics reveals the evolutionary history of the endoderm germ layer	SRS475733		32.5	1	1349489	47232115		RNA-Seq	TRANSCRIPTOMIC	cDNA
SRR962098	SRX343167	GSM1221024: mpfc_100; Caenorhabditis elegans; RNA-Seq	Caenorhabditis elegans	Illumina HiSeq 2000	GEO	SRP029448	Spatiotemporal embryonic transcriptomics reveals the evolutionary history of the endoderm germ layer	SRS475734		93.53	1	3901120	136539200		RNA-Seq	TRANSCRIPTOMIC	cDNA
SRR962099	SRX343168	GSM1221025: mpfc_120; Caenorhabditis elegans; RNA-Seq	Caenorhabditis elegans	Illumina HiSeq 2000	GEO	SRP029448	Spatiotemporal embryonic transcriptomics reveals the evolutionary history of the endoderm germ layer	SRS475735		61.41	1	2574654	90112890		RNA-Seq	TRANSCRIPTOMIC	cDNA
SRR962100	SRX343169	GSM1221026: mpfc_130; Caenorhabditis elegans; RNA-Seq	Caenorhabditis elegans	Illumina HiSeq 2000	GEO	SRP029448	Spatiotemporal embryonic transcriptomics reveals the evolutionary history of the endoderm germ layer	SRS475736		43.09	1	1781412	62349420		RNA-Seq	TRANSCRIPTOMIC	cDNA
SRR962101	SRX343170	GSM1221027: mpfc_150; Caenorhabditis elegans; RNA-Seq	Caenorhabditis elegans	Illumina HiSeq 2000	GEO	SRP029448	Spatiotemporal embryonic transcriptomics reveals the evolutionary history of the endoderm germ layer	SRS475737		42.88	1	1790297	62660395		RNA-Seq	TRANSCRIPTOMIC	cDNA
SRR962102	SRX343171	GSM1221028: mpfc_160; Caenorhabditis elegans; RNA-Seq	Caenorhabditis elegans	Illumina HiSeq 2000	GEO	SRP029448	Spatiotemporal embryonic transcriptomics reveals the evolutionary history of the endoderm germ layer	SRS475738		54.63	1	2281586	79855510		RNA-Seq	TRANSCRIPTOMIC	cDNA
SRR962103	SRX343172	GSM1221029: mpfc_170; Caenorhabditis elegans; RNA-Seq	Caenorhabditis elegans	Illumina HiSeq 2000	GEO	SRP029448	Spatiotemporal embryonic transcriptomics reveals the evolutionary history of the endoderm germ layer	SRS475739		56.97	1	2404840	84169400		RNA-Seq	TRANSCRIPTOMIC	cDNA
SRR962104	SRX343173	GSM1221030: mpfc_180; Caenorhabditis elegans; RNA-Seq	Caenorhabditis elegans	Illumina HiSeq 2000	GEO	SRP029448	Spatiotemporal embryonic transcriptomics reveals the evolutionary history of the endoderm germ layer	SRS475740		46.36	1	1986352	69522320		RNA-Seq	TRANSCRIPTOMIC	cDNA
SRR962105	SRX343174	GSM1221031: mpfc_190; Caenorhabditis elegans; RNA-Seq	Caenorhabditis elegans	Illumina HiSeq 2000	GEO	SRP029448	Spatiotemporal embryonic transcriptomics reveals the evolutionary history of the endoderm germ layer	SRS475741		37.23	1	1591493	55702255		RNA-Seq	TRANSCRIPTOMIC	cDNA
SRR962106	SRX343175	GSM1221032: mpfc_200_rep1; Caenorhabditis elegans; RNA-Seq	Caenorhabditis elegans	Illumina HiSeq 2000	GEO	SRP029448	Spatiotemporal embryonic transcriptomics reveals the evolutionary history of the endoderm germ layer	SRS475742		45.09	1	1821534	63753690		RNA-Seq	TRANSCRIPTOMIC	cDNA
SRR962107	SRX343176	GSM1221033: mpfc_200_rep2; Caenorhabditis elegans; RNA-Seq	Caenorhabditis elegans	Illumina HiSeq 2000	GEO	SRP029448	Spatiotemporal embryonic transcriptomics reveals the evolutionary history of the endoderm germ layer	SRS475743		36.45	1	1417246	49603610		RNA-Seq	TRANSCRIPTOMIC	cDNA
SRR962108	SRX343177	GSM1221034: mpfc_210; Caenorhabditis elegans; RNA-Seq	Caenorhabditis elegans	Illumina HiSeq 2000	GEO	SRP029448	Spatiotemporal embryonic transcriptomics reveals the evolutionary history of the endoderm germ layer	SRS475744		46.41	1	1809268	63324380		RNA-Seq	TRANSCRIPTOMIC	cDNA
SRR962109	SRX343178	GSM1221035: mpfc_220_rep1; Caenorhabditis elegans; RNA-Seq	Caenorhabditis elegans	Illumina HiSeq 2000	GEO	SRP029448	Spatiotemporal embryonic transcriptomics reveals the evolutionary history of the endoderm germ layer	SRS475745		106.71	1	4311499	150902465		RNA-Seq	TRANSCRIPTOMIC	cDNA
SRR962110	SRX343179	GSM1221036: mpfc_220_rep2; Caenorhabditis elegans; RNA-Seq	Caenorhabditis elegans	Illumina HiSeq 2000	GEO	SRP029448	Spatiotemporal embryonic transcriptomics reveals the evolutionary history of the endoderm germ layer	SRS475747		50.55	1	2010445	70365575		RNA-Seq	TRANSCRIPTOMIC	cDNA
SRR962111	SRX343180	GSM1221037: mpfc_230; Caenorhabditis elegans; RNA-Seq	Caenorhabditis elegans	Illumina HiSeq 2000	GEO	SRP029448	Spatiotemporal embryonic transcriptomics reveals the evolutionary history of the endoderm germ layer	SRS475746		49.8	1	2157436	75510260		RNA-Seq	TRANSCRIPTOMIC	cDNA
SRR962112	SRX343181	GSM1221038: mpfc_260; Caenorhabditis elegans; RNA-Seq	Caenorhabditis elegans	Illumina HiSeq 2000	GEO	SRP029448	Spatiotemporal embryonic transcriptomics reveals the evolutionary history of the endoderm germ layer	SRS475748		68.19	1	2945269	103084415		RNA-Seq	TRANSCRIPTOMIC	cDNA
SRR962113	SRX343182	GSM1221039: mpfc_270; Caenorhabditis elegans; RNA-Seq	Caenorhabditis elegans	Illumina HiSeq 2000	GEO	SRP029448	Spatiotemporal embryonic transcriptomics reveals the evolutionary history of the endoderm germ layer	SRS475749		58.25	1	2516221	88067735		RNA-Seq	TRANSCRIPTOMIC	cDNA
SRR962114	SRX343183	GSM1221040: mpfc_280; Caenorhabditis elegans; RNA-Seq	Caenorhabditis elegans	Illumina HiSeq 2000	GEO	SRP029448	Spatiotemporal embryonic transcriptomics reveals the evolutionary history of the endoderm germ layer	SRS475750		44.2	1	1706792	59737720		RNA-Seq	TRANSCRIPTOMIC	cDNA
SRR962115	SRX343184	GSM1221041: mpfc_290; Caenorhabditis elegans; RNA-Seq	Caenorhabditis elegans	Illumina HiSeq 2000	GEO	SRP029448	Spatiotemporal embryonic transcriptomics reveals the evolutionary history of the endoderm germ layer	SRS475751		122.63	1	4934936	172722760		RNA-Seq	TRANSCRIPTOMIC	cDNA
SRR962116	SRX343185	GSM1221042: mpfc_300; Caenorhabditis elegans; RNA-Seq	Caenorhabditis elegans	Illumina HiSeq 2000	GEO	SRP029448	Spatiotemporal embryonic transcriptomics reveals the evolutionary history of the endoderm germ layer	SRS475752		75.66	1	3285543	114994005		RNA-Seq	TRANSCRIPTOMIC	cDNA
SRR962117	SRX343186	GSM1221043: mpfc_320; Caenorhabditis elegans; RNA-Seq	Caenorhabditis elegans	Illumina HiSeq 2000	GEO	SRP029448	Spatiotemporal embryonic transcriptomics reveals the evolutionary history of the endoderm germ layer	SRS475753		83.45	1	3642891	127501185		RNA-Seq	TRANSCRIPTOMIC	cDNA
SRR962118	SRX343187	GSM1221044: mpfc_330; Caenorhabditis elegans; RNA-Seq	Caenorhabditis elegans	Illumina HiSeq 2000	GEO	SRP029448	Spatiotemporal embryonic transcriptomics reveals the evolutionary history of the endoderm germ layer	SRS475754		71.67	1	3070327	107461445		RNA-Seq	TRANSCRIPTOMIC	cDNA
SRR962119	SRX343188	GSM1221045: mpfc_340_rep1; Caenorhabditis elegans; RNA-Seq	Caenorhabditis elegans	Illumina HiSeq 2000	GEO	SRP029448	Spatiotemporal embryonic transcriptomics reveals the evolutionary history of the endoderm germ layer	SRS475756		31.62	1	1379734	48290690		RNA-Seq	TRANSCRIPTOMIC	cDNA
SRR962120	SRX343189	GSM1221046: mpfc_340_rep2; Caenorhabditis elegans; RNA-Seq	Caenorhabditis elegans	Illumina HiSeq 2000	GEO	SRP029448	Spatiotemporal embryonic transcriptomics reveals the evolutionary history of the endoderm germ layer	SRS475755		44.32	1	1816406	63574210		RNA-Seq	TRANSCRIPTOMIC	cDNA
SRR962121	SRX343190	GSM1221047: mpfc_350; Caenorhabditis elegans; RNA-Seq	Caenorhabditis elegans	Illumina HiSeq 2000	GEO	SRP029448	Spatiotemporal embryonic transcriptomics reveals the evolutionary history of the endoderm germ layer	SRS475757		64.15	1	2797431	97910085		RNA-Seq	TRANSCRIPTOMIC	cDNA
SRR962122	SRX343191	GSM1221048: mpfc_360; Caenorhabditis elegans; RNA-Seq	Caenorhabditis elegans	Illumina HiSeq 2000	GEO	SRP029448	Spatiotemporal embryonic transcriptomics reveals the evolutionary history of the endoderm germ layer	SRS475758		64.11	1	2773930	97087550		RNA-Seq	TRANSCRIPTOMIC	cDNA
SRR962123	SRX343192	GSM1221049: mpfc_370; Caenorhabditis elegans; RNA-Seq	Caenorhabditis elegans	Illumina HiSeq 2000	GEO	SRP029448	Spatiotemporal embryonic transcriptomics reveals the evolutionary history of the endoderm germ layer	SRS475759		50.57	1	2238424	78344840		RNA-Seq	TRANSCRIPTOMIC	cDNA
SRR962124	SRX343193	GSM1221050: mpfc_380_rep1; Caenorhabditis elegans; RNA-Seq	Caenorhabditis elegans	Illumina HiSeq 2000	GEO	SRP029448	Spatiotemporal embryonic transcriptomics reveals the evolutionary history of the endoderm germ layer	SRS475760		73.86	1	3055156	106930460		RNA-Seq	TRANSCRIPTOMIC	cDNA
SRR962125	SRX343194	GSM1221051: mpfc_380_rep2; Caenorhabditis elegans; RNA-Seq	Caenorhabditis elegans	Illumina HiSeq 2000	GEO	SRP029448	Spatiotemporal embryonic transcriptomics reveals the evolutionary history of the endoderm germ layer	SRS475761		74.19	1	3079044	107766540		RNA-Seq	TRANSCRIPTOMIC	cDNA
SRR962126	SRX343195	GSM1221052: mpfc_390; Caenorhabditis elegans; RNA-Seq	Caenorhabditis elegans	Illumina HiSeq 2000	GEO	SRP029448	Spatiotemporal embryonic transcriptomics reveals the evolutionary history of the endoderm germ layer	SRS475762		83.53	1	3682929	128902515		RNA-Seq	TRANSCRIPTOMIC	cDNA
SRR962127	SRX343196	GSM1221053: mpfc_400_rep1; Caenorhabditis elegans; RNA-Seq	Caenorhabditis elegans	Illumina HiSeq 2000	GEO	SRP029448	Spatiotemporal embryonic transcriptomics reveals the evolutionary history of the endoderm germ layer	SRS475763		50.25	1	2061818	72163630		RNA-Seq	TRANSCRIPTOMIC	cDNA
SRR962128	SRX343197	GSM1221054: mpfc_400_rep2; Caenorhabditis elegans; RNA-Seq	Caenorhabditis elegans	Illumina HiSeq 2000	GEO	SRP029448	Spatiotemporal embryonic transcriptomics reveals the evolutionary history of the endoderm germ layer	SRS475764		171.42	1	6865480	240291800		RNA-Seq	TRANSCRIPTOMIC	cDNA
SRR962129	SRX343198	GSM1221055: mpfc_410_rep1; Caenorhabditis elegans; RNA-Seq	Caenorhabditis elegans	Illumina HiSeq 2000	GEO	SRP029448	Spatiotemporal embryonic transcriptomics reveals the evolutionary history of the endoderm germ layer	SRS475765		52.92	1	2362847	82699645		RNA-Seq	TRANSCRIPTOMIC	cDNA
SRR962130	SRX343199	GSM1221056: mpfc_410_rep2; Caenorhabditis elegans; RNA-Seq	Caenorhabditis elegans	Illumina HiSeq 2000	GEO	SRP029448	Spatiotemporal embryonic transcriptomics reveals the evolutionary history of the endoderm germ layer	SRS475766		53.07	1	1945136	68079760		RNA-Seq	TRANSCRIPTOMIC	cDNA
SRR962131	SRX343200	GSM1221057: mpfc_420; Caenorhabditis elegans; RNA-Seq	Caenorhabditis elegans	Illumina HiSeq 2000	GEO	SRP029448	Spatiotemporal embryonic transcriptomics reveals the evolutionary history of the endoderm germ layer	SRS475767		73	1	3217035	112596225		RNA-Seq	TRANSCRIPTOMIC	cDNA
SRR962132	SRX343201	GSM1221058: mpfc_430; Caenorhabditis elegans; RNA-Seq	Caenorhabditis elegans	Illumina HiSeq 2000	GEO	SRP029448	Spatiotemporal embryonic transcriptomics reveals the evolutionary history of the endoderm germ layer	SRS475768		92.81	1	3440411	120414385		RNA-Seq	TRANSCRIPTOMIC	cDNA
SRR962133	SRX343202	GSM1221059: mpfc_450; Caenorhabditis elegans; RNA-Seq	Caenorhabditis elegans	Illumina HiSeq 2000	GEO	SRP029448	Spatiotemporal embryonic transcriptomics reveals the evolutionary history of the endoderm germ layer	SRS475769		51.27	1	1893642	66277470		RNA-Seq	TRANSCRIPTOMIC	cDNA
SRR962134	SRX343203	GSM1221060: mpfc_490; Caenorhabditis elegans; RNA-Seq	Caenorhabditis elegans	Illumina HiSeq 2000	GEO	SRP029448	Spatiotemporal embryonic transcriptomics reveals the evolutionary history of the endoderm germ layer	SRS475770		52.7	1	1935437	67740295		RNA-Seq	TRANSCRIPTOMIC	cDNA
SRR962135	SRX343204	GSM1221061: mpfc_510; Caenorhabditis elegans; RNA-Seq	Caenorhabditis elegans	Illumina HiSeq 2000	GEO	SRP029448	Spatiotemporal embryonic transcriptomics reveals the evolutionary history of the endoderm germ layer	SRS475771		50.21	1	1838848	64359680		RNA-Seq	TRANSCRIPTOMIC	cDNA
SRR962136	SRX343205	GSM1221062: mpfc_550; Caenorhabditis elegans; RNA-Seq	Caenorhabditis elegans	Illumina HiSeq 2000	GEO	SRP029448	Spatiotemporal embryonic transcriptomics reveals the evolutionary history of the endoderm germ layer	SRS475772		49.24	1	1811404	63399140		RNA-Seq	TRANSCRIPTOMIC	cDNA
SRR962137	SRX343206	GSM1221063: mpfc_620; Caenorhabditis elegans; RNA-Seq	Caenorhabditis elegans	Illumina HiSeq 2000	GEO	SRP029448	Spatiotemporal embryonic transcriptomics reveals the evolutionary history of the endoderm germ layer	SRS475773		51.93	1	1915020	67025700		RNA-Seq	TRANSCRIPTOMIC	cDNA
SRR962138	SRX343207	GSM1221064: mpfc_630; Caenorhabditis elegans; RNA-Seq	Caenorhabditis elegans	Illumina HiSeq 2000	GEO	SRP029448	Spatiotemporal embryonic transcriptomics reveals the evolutionary history of the endoderm germ layer	SRS475774		44.72	1	1631963	57118705		RNA-Seq	TRANSCRIPTOMIC	cDNA
SRR962139	SRX343208	GSM1221065: mpfc_640; Caenorhabditis elegans; RNA-Seq	Caenorhabditis elegans	Illumina HiSeq 2000	GEO	SRP029448	Spatiotemporal embryonic transcriptomics reveals the evolutionary history of the endoderm germ layer	SRS475775		69.35	1	2552787	89347545		RNA-Seq	TRANSCRIPTOMIC	cDNA
SRR962140	SRX343209	GSM1221066: mpfc_700; Caenorhabditis elegans; RNA-Seq	Caenorhabditis elegans	Illumina HiSeq 2000	GEO	SRP029448	Spatiotemporal embryonic transcriptomics reveals the evolutionary history of the endoderm germ layer	SRS475776		57.73	1	2135441	74740435		RNA-Seq	TRANSCRIPTOMIC	cDNA
SRR962141	SRX343210	GSM1221067: mpfc_750; Caenorhabditis elegans; RNA-Seq	Caenorhabditis elegans	Illumina HiSeq 2000	GEO	SRP029448	Spatiotemporal embryonic transcriptomics reveals the evolutionary history of the endoderm germ layer	SRS475777		50.31	1	1850411	64764385		RNA-Seq	TRANSCRIPTOMIC	cDNA
SRR962142	SRX343211	GSM1221068: mpfc_760; Caenorhabditis elegans; RNA-Seq	Caenorhabditis elegans	Illumina HiSeq 2000	GEO	SRP029448	Spatiotemporal embryonic transcriptomics reveals the evolutionary history of the endoderm germ layer	SRS475779		59.94	1	2215761	77551635		RNA-Seq	TRANSCRIPTOMIC	cDNA
SRR962143	SRX343212	GSM1221069: mpfc_800; Caenorhabditis elegans; RNA-Seq	Caenorhabditis elegans	Illumina HiSeq 2000	GEO	SRP029448	Spatiotemporal embryonic transcriptomics reveals the evolutionary history of the endoderm germ layer	SRS475778		44.9	1	1656692	57984220		RNA-Seq	TRANSCRIPTOMIC	cDNA
SRR962144	SRX343213	GSM1221070: mpfc_810; Caenorhabditis elegans; RNA-Seq	Caenorhabditis elegans	Illumina HiSeq 2000	GEO	SRP029448	Spatiotemporal embryonic transcriptomics reveals the evolutionary history of the endoderm germ layer	SRS475780		65.8	1	2417307	84605745		RNA-Seq	TRANSCRIPTOMIC	cDNA
SRR962145	SRX343214	GSM1221071: mpfc_830; Caenorhabditis elegans; RNA-Seq	Caenorhabditis elegans	Illumina HiSeq 2000	GEO	SRP029448	Spatiotemporal embryonic transcriptomics reveals the evolutionary history of the endoderm germ layer	SRS475781		72.13	1	2662100	93173500		RNA-Seq	TRANSCRIPTOMIC	cDNA
SRR962146	SRX343215	GSM1221072: P1_rep1; Caenorhabditis elegans; RNA-Seq	Caenorhabditis elegans	Illumina HiSeq 2000	GEO	SRP029448	Spatiotemporal embryonic transcriptomics reveals the evolutionary history of the endoderm germ layer	SRS475783		190.03	1	7766704	271834640		RNA-Seq	TRANSCRIPTOMIC	cDNA
SRR962147	SRX343216	GSM1221073: P1_rep2; Caenorhabditis elegans; RNA-Seq	Caenorhabditis elegans	Illumina HiSeq 2000	GEO	SRP029448	Spatiotemporal embryonic transcriptomics reveals the evolutionary history of the endoderm germ layer	SRS475782		283.32	1	11373589	398075615		RNA-Seq	TRANSCRIPTOMIC	cDNA
SRR962148	SRX343217	GSM1221074: P1_rep3; Caenorhabditis elegans; RNA-Seq	Caenorhabditis elegans	Illumina HiSeq 2000	GEO	SRP029448	Spatiotemporal embryonic transcriptomics reveals the evolutionary history of the endoderm germ layer	SRS475784		254.39	1	10317683	361118905		RNA-Seq	TRANSCRIPTOMIC	cDNA
SRR962149	SRX343218	GSM1221075: AB_(P1)_rep1; Caenorhabditis elegans; RNA-Seq	Caenorhabditis elegans	Illumina HiSeq 2000	GEO	SRP029448	Spatiotemporal embryonic transcriptomics reveals the evolutionary history of the endoderm germ layer	SRS475785		63.14	1	2743129	96009515		RNA-Seq	TRANSCRIPTOMIC	cDNA
SRR962150	SRX343219	GSM1221076: AB_(P1)_rep2; Caenorhabditis elegans; RNA-Seq	Caenorhabditis elegans	Illumina HiSeq 2000	GEO	SRP029448	Spatiotemporal embryonic transcriptomics reveals the evolutionary history of the endoderm germ layer	SRS475786		70.04	1	2998982	104964370		RNA-Seq	TRANSCRIPTOMIC	cDNA
SRR962151	SRX343220	GSM1221077: AB_(P1)_rep3; Caenorhabditis elegans; RNA-Seq	Caenorhabditis elegans	Illumina HiSeq 2000	GEO	SRP029448	Spatiotemporal embryonic transcriptomics reveals the evolutionary history of the endoderm germ layer	SRS475787		61.69	1	2678282	93739870		RNA-Seq	TRANSCRIPTOMIC	cDNA
SRR962152	SRX343221	GSM1221078: EMS_rep1; Caenorhabditis elegans; RNA-Seq	Caenorhabditis elegans	Illumina HiSeq 2000	GEO	SRP029448	Spatiotemporal embryonic transcriptomics reveals the evolutionary history of the endoderm germ layer	SRS475788		67.95	1	2809484	98331940		RNA-Seq	TRANSCRIPTOMIC	cDNA
SRR962153	SRX343222	GSM1221079: EMS_rep2; Caenorhabditis elegans; RNA-Seq	Caenorhabditis elegans	Illumina HiSeq 2000	GEO	SRP029448	Spatiotemporal embryonic transcriptomics reveals the evolutionary history of the endoderm germ layer	SRS475789		215.81	1	8851460	309801100		RNA-Seq	TRANSCRIPTOMIC	cDNA
SRR962154	SRX343223	GSM1221080: EMS_rep3; Caenorhabditis elegans; RNA-Seq	Caenorhabditis elegans	Illumina HiSeq 2000	GEO	SRP029448	Spatiotemporal embryonic transcriptomics reveals the evolutionary history of the endoderm germ layer	SRS475790		223.66	1	9357818	327523630		RNA-Seq	TRANSCRIPTOMIC	cDNA
SRR962155	SRX343224	GSM1221081: P2_(EMS)_rep1; Caenorhabditis elegans; RNA-Seq	Caenorhabditis elegans	Illumina HiSeq 2000	GEO	SRP029448	Spatiotemporal embryonic transcriptomics reveals the evolutionary history of the endoderm germ layer	SRS475791		125.82	1	5292809	185248315		RNA-Seq	TRANSCRIPTOMIC	cDNA
SRR962156	SRX343225	GSM1221082: P2_(EMS)_rep2; Caenorhabditis elegans; RNA-Seq	Caenorhabditis elegans	Illumina HiSeq 2000	GEO	SRP029448	Spatiotemporal embryonic transcriptomics reveals the evolutionary history of the endoderm germ layer	SRS475792		108.14	1	4574434	160105190		RNA-Seq	TRANSCRIPTOMIC	cDNA
SRR962157	SRX343226	GSM1221083: P2_(EMS)_rep3; Caenorhabditis elegans; RNA-Seq	Caenorhabditis elegans	Illumina HiSeq 2000	GEO	SRP029448	Spatiotemporal embryonic transcriptomics reveals the evolutionary history of the endoderm germ layer	SRS475793		43.21	1	1680802	58828070		RNA-Seq	TRANSCRIPTOMIC	cDNA
SRR962158	SRX343227	GSM1221084: AB_(EMS)_rep1; Caenorhabditis elegans; RNA-Seq	Caenorhabditis elegans	Illumina HiSeq 2000	GEO	SRP029448	Spatiotemporal embryonic transcriptomics reveals the evolutionary history of the endoderm germ layer	SRS475794		211.69	1	8868704	310404640		RNA-Seq	TRANSCRIPTOMIC	cDNA
SRR962159	SRX343228	GSM1221085: AB_(EMS)_rep2; Caenorhabditis elegans; RNA-Seq	Caenorhabditis elegans	Illumina HiSeq 2000	GEO	SRP029448	Spatiotemporal embryonic transcriptomics reveals the evolutionary history of the endoderm germ layer	SRS475795		210.81	1	8877059	310697065		RNA-Seq	TRANSCRIPTOMIC	cDNA
SRR962160	SRX343229	GSM1221086: AB_(EMS)_rep3; Caenorhabditis elegans; RNA-Seq	Caenorhabditis elegans	Illumina HiSeq 2000	GEO	SRP029448	Spatiotemporal embryonic transcriptomics reveals the evolutionary history of the endoderm germ layer	SRS475796		192.16	1	8069224	282422840		RNA-Seq	TRANSCRIPTOMIC	cDNA
SRR962161	SRX343230	GSM1221087: E_rep1; Caenorhabditis elegans; RNA-Seq	Caenorhabditis elegans	Illumina HiSeq 2000	GEO	SRP029448	Spatiotemporal embryonic transcriptomics reveals the evolutionary history of the endoderm germ layer	SRS475797		122.03	1	5368243	187888505		RNA-Seq	TRANSCRIPTOMIC	cDNA
SRR962162	SRX343231	GSM1221088: E_rep2; Caenorhabditis elegans; RNA-Seq	Caenorhabditis elegans	Illumina HiSeq 2000	GEO	SRP029448	Spatiotemporal embryonic transcriptomics reveals the evolutionary history of the endoderm germ layer	SRS475798		61.97	1	2673517	93573095		RNA-Seq	TRANSCRIPTOMIC	cDNA
SRR962163	SRX343232	GSM1221089: E_rep3; Caenorhabditis elegans; RNA-Seq	Caenorhabditis elegans	Illumina HiSeq 2000	GEO	SRP029448	Spatiotemporal embryonic transcriptomics reveals the evolutionary history of the endoderm germ layer	SRS475799		63.48	1	2736307	95770745		RNA-Seq	TRANSCRIPTOMIC	cDNA
SRR962164	SRX343233	GSM1221090: E2_rep1; Caenorhabditis elegans; RNA-Seq	Caenorhabditis elegans	Illumina HiSeq 2000	GEO	SRP029448	Spatiotemporal embryonic transcriptomics reveals the evolutionary history of the endoderm germ layer	SRS475800		115.53	1	5041209	176442315		RNA-Seq	TRANSCRIPTOMIC	cDNA
SRR962165	SRX343234	GSM1221091: E2_rep2; Caenorhabditis elegans; RNA-Seq	Caenorhabditis elegans	Illumina HiSeq 2000	GEO	SRP029448	Spatiotemporal embryonic transcriptomics reveals the evolutionary history of the endoderm germ layer	SRS475801		70.09	1	3034853	106219855		RNA-Seq	TRANSCRIPTOMIC	cDNA
SRR962166	SRX343235	GSM1221092: E2_rep3; Caenorhabditis elegans; RNA-Seq	Caenorhabditis elegans	Illumina HiSeq 2000	GEO	SRP029448	Spatiotemporal embryonic transcriptomics reveals the evolutionary history of the endoderm germ layer	SRS475802		53.83	1	2321019	81235665		RNA-Seq	TRANSCRIPTOMIC	cDNA
SRR962167	SRX343236	GSM1221093: E2+_rep1; Caenorhabditis elegans; RNA-Seq	Caenorhabditis elegans	Illumina HiSeq 2000	GEO	SRP029448	Spatiotemporal embryonic transcriptomics reveals the evolutionary history of the endoderm germ layer	SRS475804		39.43	1	1736575	60780125		RNA-Seq	TRANSCRIPTOMIC	cDNA
SRR962168	SRX343237	GSM1221094: E2+_rep2; Caenorhabditis elegans; RNA-Seq	Caenorhabditis elegans	Illumina HiSeq 2000	GEO	SRP029448	Spatiotemporal embryonic transcriptomics reveals the evolutionary history of the endoderm germ layer	SRS475803		39.27	1	1690710	59174850		RNA-Seq	TRANSCRIPTOMIC	cDNA
SRR962169	SRX343238	GSM1221095: E2+_rep3; Caenorhabditis elegans; RNA-Seq	Caenorhabditis elegans	Illumina HiSeq 2000	GEO	SRP029448	Spatiotemporal embryonic transcriptomics reveals the evolutionary history of the endoderm germ layer	SRS475805		94.97	1	4256428	148974980		RNA-Seq	TRANSCRIPTOMIC	cDNA
SRR962170	SRX343239	GSM1221096: E4_rep1; Caenorhabditis elegans; RNA-Seq	Caenorhabditis elegans	Illumina HiSeq 2000	GEO	SRP029448	Spatiotemporal embryonic transcriptomics reveals the evolutionary history of the endoderm germ layer	SRS475806		105.95	1	4641861	162465135		RNA-Seq	TRANSCRIPTOMIC	cDNA
SRR962171	SRX343240	GSM1221097: E4_rep2; Caenorhabditis elegans; RNA-Seq	Caenorhabditis elegans	Illumina HiSeq 2000	GEO	SRP029448	Spatiotemporal embryonic transcriptomics reveals the evolutionary history of the endoderm germ layer	SRS475807		32.57	1	1380557	48319495		RNA-Seq	TRANSCRIPTOMIC	cDNA
SRR962172	SRX343241	GSM1221098: E4_rep3; Caenorhabditis elegans; RNA-Seq	Caenorhabditis elegans	Illumina HiSeq 2000	GEO	SRP029448	Spatiotemporal embryonic transcriptomics reveals the evolutionary history of the endoderm germ layer	SRS475808		35.01	1	1565676	54798660		RNA-Seq	TRANSCRIPTOMIC	cDNA
SRR962173	SRX343242	GSM1221099: E4+_rep1; Caenorhabditis elegans; RNA-Seq	Caenorhabditis elegans	Illumina HiSeq 2000	GEO	SRP029448	Spatiotemporal embryonic transcriptomics reveals the evolutionary history of the endoderm germ layer	SRS475809		32	1	1364227	47747945		RNA-Seq	TRANSCRIPTOMIC	cDNA
SRR962174	SRX343243	GSM1221100: E4+_rep2; Caenorhabditis elegans; RNA-Seq	Caenorhabditis elegans	Illumina HiSeq 2000	GEO	SRP029448	Spatiotemporal embryonic transcriptomics reveals the evolutionary history of the endoderm germ layer	SRS475810		36.28	1	1567414	54859490		RNA-Seq	TRANSCRIPTOMIC	cDNA
SRR962175	SRX343244	GSM1221101: E4+_rep3; Caenorhabditis elegans; RNA-Seq	Caenorhabditis elegans	Illumina HiSeq 2000	GEO	SRP029448	Spatiotemporal embryonic transcriptomics reveals the evolutionary history of the endoderm germ layer	SRS475811		121.76	1	5507108	192748780		RNA-Seq	TRANSCRIPTOMIC	cDNA
SRR962176	SRX343245	GSM1221102: E8_rep1; Caenorhabditis elegans; RNA-Seq	Caenorhabditis elegans	Illumina HiSeq 2000	GEO	SRP029448	Spatiotemporal embryonic transcriptomics reveals the evolutionary history of the endoderm germ layer	SRS475812		92.74	1	4080204	142807140		RNA-Seq	TRANSCRIPTOMIC	cDNA
SRR962177	SRX343246	GSM1221103: E8_rep2; Caenorhabditis elegans; RNA-Seq	Caenorhabditis elegans	Illumina HiSeq 2000	GEO	SRP029448	Spatiotemporal embryonic transcriptomics reveals the evolutionary history of the endoderm germ layer	SRS475813		32.48	1	1405189	49181615		RNA-Seq	TRANSCRIPTOMIC	cDNA
SRR962178	SRX343247	GSM1221104: E8_rep3; Caenorhabditis elegans; RNA-Seq	Caenorhabditis elegans	Illumina HiSeq 2000	GEO	SRP029448	Spatiotemporal embryonic transcriptomics reveals the evolutionary history of the endoderm germ layer	SRS475814		79.96	1	3627065	126947275		RNA-Seq	TRANSCRIPTOMIC	cDNA
SRR962179	SRX343248	GSM1221105: E8+_rep1; Caenorhabditis elegans; RNA-Seq	Caenorhabditis elegans	Illumina HiSeq 2000	GEO	SRP029448	Spatiotemporal embryonic transcriptomics reveals the evolutionary history of the endoderm germ layer	SRS475815		103.67	1	4527328	158456480		RNA-Seq	TRANSCRIPTOMIC	cDNA
SRR962180	SRX343249	GSM1221106: E8+_rep2; Caenorhabditis elegans; RNA-Seq	Caenorhabditis elegans	Illumina HiSeq 2000	GEO	SRP029448	Spatiotemporal embryonic transcriptomics reveals the evolutionary history of the endoderm germ layer	SRS475816		33.42	1	1451568	50804880		RNA-Seq	TRANSCRIPTOMIC	cDNA
SRR962181	SRX343250	GSM1221107: E8+_rep3; Caenorhabditis elegans; RNA-Seq	Caenorhabditis elegans	Illumina HiSeq 2000	GEO	SRP029448	Spatiotemporal embryonic transcriptomics reveals the evolutionary history of the endoderm germ layer	SRS475817		37.6	1	1636594	57280790		RNA-Seq	TRANSCRIPTOMIC	cDNA
SRR962182	SRX343251	GSM1221108: E8++; Caenorhabditis elegans; RNA-Seq	Caenorhabditis elegans	Illumina HiSeq 2000	GEO	SRP029448	Spatiotemporal embryonic transcriptomics reveals the evolutionary history of the endoderm germ layer	SRS475818		57.33	1	2576435	90175225		RNA-Seq	TRANSCRIPTOMIC	cDNA
SRR962183	SRX343252	GSM1221109: Etr_rep1; Caenorhabditis elegans; RNA-Seq	Caenorhabditis elegans	Illumina HiSeq 2000	GEO	SRP029448	Spatiotemporal embryonic transcriptomics reveals the evolutionary history of the endoderm germ layer	SRS475819		205.47	1	8353808	292383280		RNA-Seq	TRANSCRIPTOMIC	cDNA
SRR962184	SRX343253	GSM1221110: Etr_rep2; Caenorhabditis elegans; RNA-Seq	Caenorhabditis elegans	Illumina HiSeq 2000	GEO	SRP029448	Spatiotemporal embryonic transcriptomics reveals the evolutionary history of the endoderm germ layer	SRS475821		31.14	1	1358079	47532765		RNA-Seq	TRANSCRIPTOMIC	cDNA
SRR962185	SRX343254	GSM1221111: Etr_rep3; Caenorhabditis elegans; RNA-Seq	Caenorhabditis elegans	Illumina HiSeq 2000	GEO	SRP029448	Spatiotemporal embryonic transcriptomics reveals the evolutionary history of the endoderm germ layer	SRS475820		77.11	1	3450325	120761375		RNA-Seq	TRANSCRIPTOMIC	cDNA
SRR962186	SRX343255	GSM1221112: MS_(E)_rep1; Caenorhabditis elegans; RNA-Seq	Caenorhabditis elegans	Illumina HiSeq 2000	GEO	SRP029448	Spatiotemporal embryonic transcriptomics reveals the evolutionary history of the endoderm germ layer	SRS475822		52.4	1	2243293	78515255		RNA-Seq	TRANSCRIPTOMIC	cDNA
SRR962187	SRX343256	GSM1221113: MS_(E)_rep2; Caenorhabditis elegans; RNA-Seq	Caenorhabditis elegans	Illumina HiSeq 2000	GEO	SRP029448	Spatiotemporal embryonic transcriptomics reveals the evolutionary history of the endoderm germ layer	SRS475823		42.54	1	1820365	63712775		RNA-Seq	TRANSCRIPTOMIC	cDNA
SRR962188	SRX343257	GSM1221114: MS_(E)_rep3; Caenorhabditis elegans; RNA-Seq	Caenorhabditis elegans	Illumina HiSeq 2000	GEO	SRP029448	Spatiotemporal embryonic transcriptomics reveals the evolutionary history of the endoderm germ layer	SRS475824		37.77	1	1610461	56366135		RNA-Seq	TRANSCRIPTOMIC	cDNA
SRR962189	SRX343258	GSM1221115: MS2_(E2)_rep1; Caenorhabditis elegans; RNA-Seq	Caenorhabditis elegans	Illumina HiSeq 2000	GEO	SRP029448	Spatiotemporal embryonic transcriptomics reveals the evolutionary history of the endoderm germ layer	SRS475825		77.36	1	3356727	117485445		RNA-Seq	TRANSCRIPTOMIC	cDNA
SRR962190	SRX343259	GSM1221116: MS2_(E2)_rep2; Caenorhabditis elegans; RNA-Seq	Caenorhabditis elegans	Illumina HiSeq 2000	GEO	SRP029448	Spatiotemporal embryonic transcriptomics reveals the evolutionary history of the endoderm germ layer	SRS475826		42.09	1	1755496	61442360		RNA-Seq	TRANSCRIPTOMIC	cDNA
SRR962191	SRX343260	GSM1221117: MS2_(E2)_rep3; Caenorhabditis elegans; RNA-Seq	Caenorhabditis elegans	Illumina HiSeq 2000	GEO	SRP029448	Spatiotemporal embryonic transcriptomics reveals the evolutionary history of the endoderm germ layer	SRS475827		38.8	1	1619655	56687925		RNA-Seq	TRANSCRIPTOMIC	cDNA
SRR962192	SRX343261	GSM1221118: MS4_(E2+)_rep1; Caenorhabditis elegans; RNA-Seq	Caenorhabditis elegans	Illumina HiSeq 2000	GEO	SRP029448	Spatiotemporal embryonic transcriptomics reveals the evolutionary history of the endoderm germ layer	SRS475828		67.5	1	2926873	102440555		RNA-Seq	TRANSCRIPTOMIC	cDNA
SRR962193	SRX343262	GSM1221119: MS4_(E2+)_rep2; Caenorhabditis elegans; RNA-Seq	Caenorhabditis elegans	Illumina HiSeq 2000	GEO	SRP029448	Spatiotemporal embryonic transcriptomics reveals the evolutionary history of the endoderm germ layer	SRS475829		36.66	1	1576269	55169415		RNA-Seq	TRANSCRIPTOMIC	cDNA
SRR962194	SRX343263	GSM1221120: MS4_(E2+)_rep3; Caenorhabditis elegans; RNA-Seq	Caenorhabditis elegans	Illumina HiSeq 2000	GEO	SRP029448	Spatiotemporal embryonic transcriptomics reveals the evolutionary history of the endoderm germ layer	SRS475831		143.6	1	6350047	222251645		RNA-Seq	TRANSCRIPTOMIC	cDNA
SRR962195	SRX343264	GSM1221121: MS4_(E4)_rep1; Caenorhabditis elegans; RNA-Seq	Caenorhabditis elegans	Illumina HiSeq 2000	GEO	SRP029448	Spatiotemporal embryonic transcriptomics reveals the evolutionary history of the endoderm germ layer	SRS475830		85.6	1	3767983	131879405		RNA-Seq	TRANSCRIPTOMIC	cDNA
SRR962196	SRX343265	GSM1221122: MS4_(E4)_rep2; Caenorhabditis elegans; RNA-Seq	Caenorhabditis elegans	Illumina HiSeq 2000	GEO	SRP029448	Spatiotemporal embryonic transcriptomics reveals the evolutionary history of the endoderm germ layer	SRS475832		49.9	1	2154716	75415060		RNA-Seq	TRANSCRIPTOMIC	cDNA
SRR962197	SRX343266	GSM1221123: MS4_(E4)_rep3; Caenorhabditis elegans; RNA-Seq	Caenorhabditis elegans	Illumina HiSeq 2000	GEO	SRP029448	Spatiotemporal embryonic transcriptomics reveals the evolutionary history of the endoderm germ layer	SRS475834		71.75	1	3229484	113031940		RNA-Seq	TRANSCRIPTOMIC	cDNA
SRR962198	SRX343267	GSM1221124: MS8_(E4+)_rep1; Caenorhabditis elegans; RNA-Seq	Caenorhabditis elegans	Illumina HiSeq 2000	GEO	SRP029448	Spatiotemporal embryonic transcriptomics reveals the evolutionary history of the endoderm germ layer	SRS475833		42.97	1	1872166	65525810		RNA-Seq	TRANSCRIPTOMIC	cDNA
SRR962199	SRX343268	GSM1221125: MS8_(E4+)_rep2; Caenorhabditis elegans; RNA-Seq	Caenorhabditis elegans	Illumina HiSeq 2000	GEO	SRP029448	Spatiotemporal embryonic transcriptomics reveals the evolutionary history of the endoderm germ layer	SRS475835		665.55	1	27804471	973156485		RNA-Seq	TRANSCRIPTOMIC	cDNA
SRR962200	SRX343269	GSM1221126: MS8_(E4+)_rep3; Caenorhabditis elegans; RNA-Seq	Caenorhabditis elegans	Illumina HiSeq 2000	GEO	SRP029448	Spatiotemporal embryonic transcriptomics reveals the evolutionary history of the endoderm germ layer	SRS475836		45.09	1	2034110	71193850		RNA-Seq	TRANSCRIPTOMIC	cDNA
SRR962201	SRX343270	GSM1221127: MS16_(E8)_rep1; Caenorhabditis elegans; RNA-Seq	Caenorhabditis elegans	Illumina HiSeq 2000	GEO	SRP029448	Spatiotemporal embryonic transcriptomics reveals the evolutionary history of the endoderm germ layer	SRS475837		82.92	1	3634851	127219785		RNA-Seq	TRANSCRIPTOMIC	cDNA
SRR962202	SRX343271	GSM1221128: MS16_(E8)_rep2; Caenorhabditis elegans; RNA-Seq	Caenorhabditis elegans	Illumina HiSeq 2000	GEO	SRP029448	Spatiotemporal embryonic transcriptomics reveals the evolutionary history of the endoderm germ layer	SRS475838		69.7	1	3038558	106349530		RNA-Seq	TRANSCRIPTOMIC	cDNA
SRR962203	SRX343272	GSM1221129: MS16_(E8)_rep3; Caenorhabditis elegans; RNA-Seq	Caenorhabditis elegans	Illumina HiSeq 2000	GEO	SRP029448	Spatiotemporal embryonic transcriptomics reveals the evolutionary history of the endoderm germ layer	SRS475839		94.59	1	4193437	146770295		RNA-Seq	TRANSCRIPTOMIC	cDNA
SRR962204	SRX343273	GSM1221130: MS16_(E8+)_rep1; Caenorhabditis elegans; RNA-Seq	Caenorhabditis elegans	Illumina HiSeq 2000	GEO	SRP029448	Spatiotemporal embryonic transcriptomics reveals the evolutionary history of the endoderm germ layer	SRS475840		56.71	1	2471687	86509045		RNA-Seq	TRANSCRIPTOMIC	cDNA
SRR962205	SRX343274	GSM1221131: MS16_(E8+)_rep2; Caenorhabditis elegans; RNA-Seq	Caenorhabditis elegans	Illumina HiSeq 2000	GEO	SRP029448	Spatiotemporal embryonic transcriptomics reveals the evolutionary history of the endoderm germ layer	SRS475841		94.87	1	3944364	138052740		RNA-Seq	TRANSCRIPTOMIC	cDNA
SRR962206	SRX343275	GSM1221132: MS16_(E8+)_rep3; Caenorhabditis elegans; RNA-Seq	Caenorhabditis elegans	Illumina HiSeq 2000	GEO	SRP029448	Spatiotemporal embryonic transcriptomics reveals the evolutionary history of the endoderm germ layer	SRS475842		35.81	1	1558779	54557265		RNA-Seq	TRANSCRIPTOMIC	cDNA
SRR962207	SRX343276	GSM1221133: MS16_(E8++); Caenorhabditis elegans; RNA-Seq	Caenorhabditis elegans	Illumina HiSeq 2000	GEO	SRP029448	Spatiotemporal embryonic transcriptomics reveals the evolutionary history of the endoderm germ layer	SRS475843		48.86	1	2186837	76539295		RNA-Seq	TRANSCRIPTOMIC	cDNA
SRR962208	SRX343277	GSM1221134: MStr_rep1; Caenorhabditis elegans; RNA-Seq	Caenorhabditis elegans	Illumina HiSeq 2000	GEO	SRP029448	Spatiotemporal embryonic transcriptomics reveals the evolutionary history of the endoderm germ layer	SRS475844		110.29	1	4843916	169537060		RNA-Seq	TRANSCRIPTOMIC	cDNA
SRR962209	SRX343278	GSM1221135: MStr_rep2; Caenorhabditis elegans; RNA-Seq	Caenorhabditis elegans	Illumina HiSeq 2000	GEO	SRP029448	Spatiotemporal embryonic transcriptomics reveals the evolutionary history of the endoderm germ layer	SRS475845		33.88	1	1489248	52123680		RNA-Seq	TRANSCRIPTOMIC	cDNA
SRR962210	SRX343279	GSM1221136: MStr_rep3; Caenorhabditis elegans; RNA-Seq	Caenorhabditis elegans	Illumina HiSeq 2000	GEO	SRP029448	Spatiotemporal embryonic transcriptomics reveals the evolutionary history of the endoderm germ layer	SRS475846		36.75	1	1650029	57751015		RNA-Seq	TRANSCRIPTOMIC	cDNA
SRR962211	SRX343280	GSM1221137: AB_(E)_rep1; Caenorhabditis elegans; RNA-Seq	Caenorhabditis elegans	Illumina HiSeq 2000	GEO	SRP029448	Spatiotemporal embryonic transcriptomics reveals the evolutionary history of the endoderm germ layer	SRS475847		76.04	1	3184275	111449625		RNA-Seq	TRANSCRIPTOMIC	cDNA
SRR962212	SRX343281	GSM1221138: AB_(E)_rep2; Caenorhabditis elegans; RNA-Seq	Caenorhabditis elegans	Illumina HiSeq 2000	GEO	SRP029448	Spatiotemporal embryonic transcriptomics reveals the evolutionary history of the endoderm germ layer	SRS475848		168.24	1	7651881	267815835		RNA-Seq	TRANSCRIPTOMIC	cDNA
SRR962213	SRX343282	GSM1221139: AB_(E)_rep3; Caenorhabditis elegans; RNA-Seq	Caenorhabditis elegans	Illumina HiSeq 2000	GEO	SRP029448	Spatiotemporal embryonic transcriptomics reveals the evolutionary history of the endoderm germ layer	SRS475849		142.4	1	6446048	225611680		RNA-Seq	TRANSCRIPTOMIC	cDNA
SRR962214	SRX343283	GSM1221140: AB_(E2)_rep1; Caenorhabditis elegans; RNA-Seq	Caenorhabditis elegans	Illumina HiSeq 2000	GEO	SRP029448	Spatiotemporal embryonic transcriptomics reveals the evolutionary history of the endoderm germ layer	SRS475850		139.01	1	6261254	219143890		RNA-Seq	TRANSCRIPTOMIC	cDNA
SRR962215	SRX343284	GSM1221141: AB_(E2)_rep2; Caenorhabditis elegans; RNA-Seq	Caenorhabditis elegans	Illumina HiSeq 2000	GEO	SRP029448	Spatiotemporal embryonic transcriptomics reveals the evolutionary history of the endoderm germ layer	SRS475851		47.94	1	2119140	74169900		RNA-Seq	TRANSCRIPTOMIC	cDNA
SRR962216	SRX343285	GSM1221142: AB_(E2)_rep3; Caenorhabditis elegans; RNA-Seq	Caenorhabditis elegans	Illumina HiSeq 2000	GEO	SRP029448	Spatiotemporal embryonic transcriptomics reveals the evolutionary history of the endoderm germ layer	SRS475852		76.39	1	3437296	120305360		RNA-Seq	TRANSCRIPTOMIC	cDNA
SRR962217	SRX343286	GSM1221143: AB_(E2+)_rep1; Caenorhabditis elegans; RNA-Seq	Caenorhabditis elegans	Illumina HiSeq 2000	GEO	SRP029448	Spatiotemporal embryonic transcriptomics reveals the evolutionary history of the endoderm germ layer	SRS475853		62.91	1	2604065	91142275		RNA-Seq	TRANSCRIPTOMIC	cDNA
SRR962218	SRX343287	GSM1221144: AB_(E2+)_rep2; Caenorhabditis elegans; RNA-Seq	Caenorhabditis elegans	Illumina HiSeq 2000	GEO	SRP029448	Spatiotemporal embryonic transcriptomics reveals the evolutionary history of the endoderm germ layer	SRS475854		142.71	1	6430615	225071525		RNA-Seq	TRANSCRIPTOMIC	cDNA
SRR962219	SRX343288	GSM1221145: AB_(E2+)_rep3; Caenorhabditis elegans; RNA-Seq	Caenorhabditis elegans	Illumina HiSeq 2000	GEO	SRP029448	Spatiotemporal embryonic transcriptomics reveals the evolutionary history of the endoderm germ layer	SRS475855		148.22	1	6713156	234960460		RNA-Seq	TRANSCRIPTOMIC	cDNA
SRR962220	SRX343289	GSM1221146: AB_(E4)_rep1; Caenorhabditis elegans; RNA-Seq	Caenorhabditis elegans	Illumina HiSeq 2000	GEO	SRP029448	Spatiotemporal embryonic transcriptomics reveals the evolutionary history of the endoderm germ layer	SRS475856		110.01	1	4961382	173648370		RNA-Seq	TRANSCRIPTOMIC	cDNA
SRR962221	SRX343290	GSM1221147: AB_(E4)_rep2; Caenorhabditis elegans; RNA-Seq	Caenorhabditis elegans	Illumina HiSeq 2000	GEO	SRP029448	Spatiotemporal embryonic transcriptomics reveals the evolutionary history of the endoderm germ layer	SRS475857		173.78	1	7926042	277411470		RNA-Seq	TRANSCRIPTOMIC	cDNA
SRR962222	SRX343291	GSM1221148: AB_(E4)_rep3; Caenorhabditis elegans; RNA-Seq	Caenorhabditis elegans	Illumina HiSeq 2000	GEO	SRP029448	Spatiotemporal embryonic transcriptomics reveals the evolutionary history of the endoderm germ layer	SRS475858		135.01	1	6123961	214338635		RNA-Seq	TRANSCRIPTOMIC	cDNA
SRR962223	SRX343292	GSM1221149: AB_(E4+)_rep1; Caenorhabditis elegans; RNA-Seq	Caenorhabditis elegans	Illumina HiSeq 2000	GEO	SRP029448	Spatiotemporal embryonic transcriptomics reveals the evolutionary history of the endoderm germ layer	SRS475859		124.1	1	5604353	196152355		RNA-Seq	TRANSCRIPTOMIC	cDNA
SRR962224	SRX343293	GSM1221150: AB_(E4+)_rep2; Caenorhabditis elegans; RNA-Seq	Caenorhabditis elegans	Illumina HiSeq 2000	GEO	SRP029448	Spatiotemporal embryonic transcriptomics reveals the evolutionary history of the endoderm germ layer	SRS475860		43.84	1	1970042	68951470		RNA-Seq	TRANSCRIPTOMIC	cDNA
SRR962225	SRX343294	GSM1221151: AB_(E8)_rep1; Caenorhabditis elegans; RNA-Seq	Caenorhabditis elegans	Illumina HiSeq 2000	GEO	SRP029448	Spatiotemporal embryonic transcriptomics reveals the evolutionary history of the endoderm germ layer	SRS475861		64.33	1	2678348	93742180		RNA-Seq	TRANSCRIPTOMIC	cDNA
SRR962226	SRX343295	GSM1221152: AB_(E8)_rep2; Caenorhabditis elegans; RNA-Seq	Caenorhabditis elegans	Illumina HiSeq 2000	GEO	SRP029448	Spatiotemporal embryonic transcriptomics reveals the evolutionary history of the endoderm germ layer	SRS475862		125.89	1	5660503	198117605		RNA-Seq	TRANSCRIPTOMIC	cDNA
SRR962227	SRX343296	GSM1221153: AB_(E8)_rep3; Caenorhabditis elegans; RNA-Seq	Caenorhabditis elegans	Illumina HiSeq 2000	GEO	SRP029448	Spatiotemporal embryonic transcriptomics reveals the evolutionary history of the endoderm germ layer	SRS475863		120.89	1	5470912	191481920		RNA-Seq	TRANSCRIPTOMIC	cDNA
SRR962228	SRX343297	GSM1221154: AB_(E8+)_rep1; Caenorhabditis elegans; RNA-Seq	Caenorhabditis elegans	Illumina HiSeq 2000	GEO	SRP029448	Spatiotemporal embryonic transcriptomics reveals the evolutionary history of the endoderm germ layer	SRS475864		44.36	1	1838350	64342250		RNA-Seq	TRANSCRIPTOMIC	cDNA
SRR962229	SRX343298	GSM1221155: AB_(E8+)_rep2; Caenorhabditis elegans; RNA-Seq	Caenorhabditis elegans	Illumina HiSeq 2000	GEO	SRP029448	Spatiotemporal embryonic transcriptomics reveals the evolutionary history of the endoderm germ layer	SRS475865		140.4	1	6349203	222222105		RNA-Seq	TRANSCRIPTOMIC	cDNA
SRR962230	SRX343299	GSM1221156: AB_(E8+)_rep3; Caenorhabditis elegans; RNA-Seq	Caenorhabditis elegans	Illumina HiSeq 2000	GEO	SRP029448	Spatiotemporal embryonic transcriptomics reveals the evolutionary history of the endoderm germ layer	SRS475866		139.1	1	6323480	221321800		RNA-Seq	TRANSCRIPTOMIC	cDNA
SRR962231	SRX343300	GSM1221157: AB_(E8++)_rep1; Caenorhabditis elegans; RNA-Seq	Caenorhabditis elegans	Illumina HiSeq 2000	GEO	SRP029448	Spatiotemporal embryonic transcriptomics reveals the evolutionary history of the endoderm germ layer	SRS475867		91.71	1	4174105	146093675		RNA-Seq	TRANSCRIPTOMIC	cDNA
SRR962232	SRX343301	GSM1221158: AB_(E8++)_rep2; Caenorhabditis elegans; RNA-Seq	Caenorhabditis elegans	Illumina HiSeq 2000	GEO	SRP029448	Spatiotemporal embryonic transcriptomics reveals the evolutionary history of the endoderm germ layer	SRS475868		135.44	1	6121078	214237730		RNA-Seq	TRANSCRIPTOMIC	cDNA
SRR962233	SRX343302	GSM1221159: AB_(E8++)_rep3; Caenorhabditis elegans; RNA-Seq	Caenorhabditis elegans	Illumina HiSeq 2000	GEO	SRP029448	Spatiotemporal embryonic transcriptomics reveals the evolutionary history of the endoderm germ layer	SRS475869		140.59	1	6428586	225000510		RNA-Seq	TRANSCRIPTOMIC	cDNA
SRR962234	SRX343303	GSM1221160: ABtr_rep1; Caenorhabditis elegans; RNA-Seq	Caenorhabditis elegans	Illumina HiSeq 2000	GEO	SRP029448	Spatiotemporal embryonic transcriptomics reveals the evolutionary history of the endoderm germ layer	SRS475870		41.75	1	1739433	60880155		RNA-Seq	TRANSCRIPTOMIC	cDNA
SRR962235	SRX343304	GSM1221161: ABtr_rep2; Caenorhabditis elegans; RNA-Seq	Caenorhabditis elegans	Illumina HiSeq 2000	GEO	SRP029448	Spatiotemporal embryonic transcriptomics reveals the evolutionary history of the endoderm germ layer	SRS475871		114.41	1	5194084	181792940		RNA-Seq	TRANSCRIPTOMIC	cDNA
SRR962236	SRX343305	GSM1221162: ABtr_rep3; Caenorhabditis elegans; RNA-Seq	Caenorhabditis elegans	Illumina HiSeq 2000	GEO	SRP029448	Spatiotemporal embryonic transcriptomics reveals the evolutionary history of the endoderm germ layer	SRS475872		135.87	1	6168369	215892915		RNA-Seq	TRANSCRIPTOMIC	cDNA
SRR962237	SRX343306	GSM1221163: C_(E)_rep1; Caenorhabditis elegans; RNA-Seq	Caenorhabditis elegans	Illumina HiSeq 2000	GEO	SRP029448	Spatiotemporal embryonic transcriptomics reveals the evolutionary history of the endoderm germ layer	SRS475873		72.22	1	2970341	103961935		RNA-Seq	TRANSCRIPTOMIC	cDNA
SRR962238	SRX343307	GSM1221164: C_(E)_rep2; Caenorhabditis elegans; RNA-Seq	Caenorhabditis elegans	Illumina HiSeq 2000	GEO	SRP029448	Spatiotemporal embryonic transcriptomics reveals the evolutionary history of the endoderm germ layer	SRS475874		62.93	1	2593036	90756260		RNA-Seq	TRANSCRIPTOMIC	cDNA
SRR962239	SRX343308	GSM1221165: C_(E)_rep3; Caenorhabditis elegans; RNA-Seq	Caenorhabditis elegans	Illumina HiSeq 2000	GEO	SRP029448	Spatiotemporal embryonic transcriptomics reveals the evolutionary history of the endoderm germ layer	SRS475875		182.67	1	7673915	268587025		RNA-Seq	TRANSCRIPTOMIC	cDNA
SRR962240	SRX343309	GSM1221166: C_(E2)_rep1; Caenorhabditis elegans; RNA-Seq	Caenorhabditis elegans	Illumina HiSeq 2000	GEO	SRP029448	Spatiotemporal embryonic transcriptomics reveals the evolutionary history of the endoderm germ layer	SRS475876		33.8	1	1462363	51182705		RNA-Seq	TRANSCRIPTOMIC	cDNA
SRR962241	SRX343310	GSM1221167: C_(E2)_rep2; Caenorhabditis elegans; RNA-Seq	Caenorhabditis elegans	Illumina HiSeq 2000	GEO	SRP029448	Spatiotemporal embryonic transcriptomics reveals the evolutionary history of the endoderm germ layer	SRS475879		114.77	1	5194637	181812295		RNA-Seq	TRANSCRIPTOMIC	cDNA
SRR962242	SRX343311	GSM1221168: C_(E2)_rep3; Caenorhabditis elegans; RNA-Seq	Caenorhabditis elegans	Illumina HiSeq 2000	GEO	SRP029448	Spatiotemporal embryonic transcriptomics reveals the evolutionary history of the endoderm germ layer	SRS475878		84.91	1	3827934	133977690		RNA-Seq	TRANSCRIPTOMIC	cDNA
SRR962243	SRX343312	GSM1221169: C_(E2+)_rep1; Caenorhabditis elegans; RNA-Seq	Caenorhabditis elegans	Illumina HiSeq 2000	GEO	SRP029448	Spatiotemporal embryonic transcriptomics reveals the evolutionary history of the endoderm germ layer	SRS475881		130.34	1	5827815	203973525		RNA-Seq	TRANSCRIPTOMIC	cDNA
SRR962244	SRX343313	GSM1221170: C_(E2+)_rep2; Caenorhabditis elegans; RNA-Seq	Caenorhabditis elegans	Illumina HiSeq 2000	GEO	SRP029448	Spatiotemporal embryonic transcriptomics reveals the evolutionary history of the endoderm germ layer	SRS475880		50.66	1	2267069	79347415		RNA-Seq	TRANSCRIPTOMIC	cDNA
SRR962245	SRX343314	GSM1221171: C_(E4)_rep1; Caenorhabditis elegans; RNA-Seq	Caenorhabditis elegans	Illumina HiSeq 2000	GEO	SRP029448	Spatiotemporal embryonic transcriptomics reveals the evolutionary history of the endoderm germ layer	SRS475883		77.38	1	3399245	118973575		RNA-Seq	TRANSCRIPTOMIC	cDNA
SRR962246	SRX343315	GSM1221172: C_(E4)_rep2; Caenorhabditis elegans; RNA-Seq	Caenorhabditis elegans	Illumina HiSeq 2000	GEO	SRP029448	Spatiotemporal embryonic transcriptomics reveals the evolutionary history of the endoderm germ layer	SRS475882		70.6	1	3163702	110729570		RNA-Seq	TRANSCRIPTOMIC	cDNA
SRR962247	SRX343316	GSM1221173: C_(E4+)_rep1; Caenorhabditis elegans; RNA-Seq	Caenorhabditis elegans	Illumina HiSeq 2000	GEO	SRP029448	Spatiotemporal embryonic transcriptomics reveals the evolutionary history of the endoderm germ layer	SRS475884		78.07	1	3512262	122929170		RNA-Seq	TRANSCRIPTOMIC	cDNA
SRR962248	SRX343317	GSM1221174: C_(E4+)_rep2; Caenorhabditis elegans; RNA-Seq	Caenorhabditis elegans	Illumina HiSeq 2000	GEO	SRP029448	Spatiotemporal embryonic transcriptomics reveals the evolutionary history of the endoderm germ layer	SRS475885		52.53	1	2360322	82611270		RNA-Seq	TRANSCRIPTOMIC	cDNA
SRR962249	SRX343318	GSM1221175: C_(E8)_rep1; Caenorhabditis elegans; RNA-Seq	Caenorhabditis elegans	Illumina HiSeq 2000	GEO	SRP029448	Spatiotemporal embryonic transcriptomics reveals the evolutionary history of the endoderm germ layer	SRS475886		112.02	1	4885419	170989665		RNA-Seq	TRANSCRIPTOMIC	cDNA
SRR962250	SRX343319	GSM1221176: C_(E8)_rep2; Caenorhabditis elegans; RNA-Seq	Caenorhabditis elegans	Illumina HiSeq 2000	GEO	SRP029448	Spatiotemporal embryonic transcriptomics reveals the evolutionary history of the endoderm germ layer	SRS475888		98.56	1	4418306	154640710		RNA-Seq	TRANSCRIPTOMIC	cDNA
SRR962251	SRX343320	GSM1221177: C_(E8+); Caenorhabditis elegans; RNA-Seq	Caenorhabditis elegans	Illumina HiSeq 2000	GEO	SRP029448	Spatiotemporal embryonic transcriptomics reveals the evolutionary history of the endoderm germ layer	SRS475887		77.57	1	3479619	121786665		RNA-Seq	TRANSCRIPTOMIC	cDNA
SRR962252	SRX343321	GSM1221178: C_(E8++)_rep2; Caenorhabditis elegans; RNA-Seq	Caenorhabditis elegans	Illumina HiSeq 2000	GEO	SRP029448	Spatiotemporal embryonic transcriptomics reveals the evolutionary history of the endoderm germ layer	SRS475889		42.83	1	1916884	67090940		RNA-Seq	TRANSCRIPTOMIC	cDNA
SRR962253	SRX343322	GSM1221179: C_(E8++)_rep1; Caenorhabditis elegans; RNA-Seq	Caenorhabditis elegans	Illumina HiSeq 2000	GEO	SRP029448	Spatiotemporal embryonic transcriptomics reveals the evolutionary history of the endoderm germ layer	SRS475890		106.6	1	4755440	166440400		RNA-Seq	TRANSCRIPTOMIC	cDNA
SRR962254	SRX343323	GSM1221180: Ctr_rep1; Caenorhabditis elegans; RNA-Seq	Caenorhabditis elegans	Illumina HiSeq 2000	GEO	SRP029448	Spatiotemporal embryonic transcriptomics reveals the evolutionary history of the endoderm germ layer	SRS475891		108.91	1	4815237	168533295		RNA-Seq	TRANSCRIPTOMIC	cDNA
SRR962255	SRX343324	GSM1221181: Ctr_rep2; Caenorhabditis elegans; RNA-Seq	Caenorhabditis elegans	Illumina HiSeq 2000	GEO	SRP029448	Spatiotemporal embryonic transcriptomics reveals the evolutionary history of the endoderm germ layer	SRS475892		44.13	1	1930612	67571420		RNA-Seq	TRANSCRIPTOMIC	cDNA
SRR962256	SRX343325	GSM1221182: Ctr_rep3; Caenorhabditis elegans; RNA-Seq	Caenorhabditis elegans	Illumina HiSeq 2000	GEO	SRP029448	Spatiotemporal embryonic transcriptomics reveals the evolutionary history of the endoderm germ layer	SRS475893		48.66	1	2177972	76229020		RNA-Seq	TRANSCRIPTOMIC	cDNA
SRR962257	SRX343326	GSM1221183: P3_(E)_rep1; Caenorhabditis elegans; RNA-Seq	Caenorhabditis elegans	Illumina HiSeq 2000	GEO	SRP029448	Spatiotemporal embryonic transcriptomics reveals the evolutionary history of the endoderm germ layer	SRS475894		97.63	1	4419288	154675080		RNA-Seq	TRANSCRIPTOMIC	cDNA
SRR962258	SRX343327	GSM1221184: P3_(E)_rep2; Caenorhabditis elegans; RNA-Seq	Caenorhabditis elegans	Illumina HiSeq 2000	GEO	SRP029448	Spatiotemporal embryonic transcriptomics reveals the evolutionary history of the endoderm germ layer	SRS475895		91.57	1	3733151	130660285		RNA-Seq	TRANSCRIPTOMIC	cDNA
SRR962259	SRX343328	GSM1221185: P3_(E)_rep3; Caenorhabditis elegans; RNA-Seq	Caenorhabditis elegans	Illumina HiSeq 2000	GEO	SRP029448	Spatiotemporal embryonic transcriptomics reveals the evolutionary history of the endoderm germ layer	SRS475896		90.14	1	3810298	133360430		RNA-Seq	TRANSCRIPTOMIC	cDNA
SRR962260	SRX343329	GSM1221186: P4D_(E2)_rep1; Caenorhabditis elegans; RNA-Seq	Caenorhabditis elegans	Illumina HiSeq 2000	GEO	SRP029448	Spatiotemporal embryonic transcriptomics reveals the evolutionary history of the endoderm germ layer	SRS475897		56.55	1	2526388	88423580		RNA-Seq	TRANSCRIPTOMIC	cDNA
SRR962261	SRX343330	GSM1221187: P4D_(E2)_rep2; Caenorhabditis elegans; RNA-Seq	Caenorhabditis elegans	Illumina HiSeq 2000	GEO	SRP029448	Spatiotemporal embryonic transcriptomics reveals the evolutionary history of the endoderm germ layer	SRS475898		118.78	1	5304647	185662645		RNA-Seq	TRANSCRIPTOMIC	cDNA
SRR962262	SRX343331	GSM1221188: P4D_(E2+)_rep1; Caenorhabditis elegans; RNA-Seq	Caenorhabditis elegans	Illumina HiSeq 2000	GEO	SRP029448	Spatiotemporal embryonic transcriptomics reveals the evolutionary history of the endoderm germ layer	SRS475899		80.55	1	3598772	125957020		RNA-Seq	TRANSCRIPTOMIC	cDNA
SRR962263	SRX343332	GSM1221189: P4D_(E2+)_rep2; Caenorhabditis elegans; RNA-Seq	Caenorhabditis elegans	Illumina HiSeq 2000	GEO	SRP029448	Spatiotemporal embryonic transcriptomics reveals the evolutionary history of the endoderm germ layer	SRS475901		95.51	1	4288396	150093860		RNA-Seq	TRANSCRIPTOMIC	cDNA
SRR962264	SRX343333	GSM1221190: PD_(E4)_rep1; Caenorhabditis elegans; RNA-Seq	Caenorhabditis elegans	Illumina HiSeq 2000	GEO	SRP029448	Spatiotemporal embryonic transcriptomics reveals the evolutionary history of the endoderm germ layer	SRS475900		32.27	1	1385544	48494040		RNA-Seq	TRANSCRIPTOMIC	cDNA
SRR962265	SRX343334	GSM1221191: PD_(E4)_rep2; Caenorhabditis elegans; RNA-Seq	Caenorhabditis elegans	Illumina HiSeq 2000	GEO	SRP029448	Spatiotemporal embryonic transcriptomics reveals the evolutionary history of the endoderm germ layer	SRS475902		394.46	1	16441498	575452430		RNA-Seq	TRANSCRIPTOMIC	cDNA
SRR962266	SRX343335	GSM1221192: PD_(E4+)_rep1; Caenorhabditis elegans; RNA-Seq	Caenorhabditis elegans	Illumina HiSeq 2000	GEO	SRP029448	Spatiotemporal embryonic transcriptomics reveals the evolutionary history of the endoderm germ layer	SRS475903		33.09	1	1432433	50135155		RNA-Seq	TRANSCRIPTOMIC	cDNA
SRR962267	SRX343336	GSM1221193: PD_(E4+)_rep2; Caenorhabditis elegans; RNA-Seq	Caenorhabditis elegans	Illumina HiSeq 2000	GEO	SRP029448	Spatiotemporal embryonic transcriptomics reveals the evolutionary history of the endoderm germ layer	SRS475904		88.44	1	3987794	139572790		RNA-Seq	TRANSCRIPTOMIC	cDNA
SRR962268	SRX343337	GSM1221194: PD_(E4+)_rep3; Caenorhabditis elegans; RNA-Seq	Caenorhabditis elegans	Illumina HiSeq 2000	GEO	SRP029448	Spatiotemporal embryonic transcriptomics reveals the evolutionary history of the endoderm germ layer	SRS475905		35.89	1	1599496	55982360		RNA-Seq	TRANSCRIPTOMIC	cDNA
SRR962269	SRX343338	GSM1221195: PD_(E8)_rep1; Caenorhabditis elegans; RNA-Seq	Caenorhabditis elegans	Illumina HiSeq 2000	GEO	SRP029448	Spatiotemporal embryonic transcriptomics reveals the evolutionary history of the endoderm germ layer	SRS475906		46.81	1	2059286	72075010		RNA-Seq	TRANSCRIPTOMIC	cDNA
SRR962270	SRX343339	GSM1221196: PD_(E8)_rep2; Caenorhabditis elegans; RNA-Seq	Caenorhabditis elegans	Illumina HiSeq 2000	GEO	SRP029448	Spatiotemporal embryonic transcriptomics reveals the evolutionary history of the endoderm germ layer	SRS475907		30.89	1	1348838	47209330		RNA-Seq	TRANSCRIPTOMIC	cDNA
SRR962271	SRX343340	GSM1221197: PD_(E8+); Caenorhabditis elegans; RNA-Seq	Caenorhabditis elegans	Illumina HiSeq 2000	GEO	SRP029448	Spatiotemporal embryonic transcriptomics reveals the evolutionary history of the endoderm germ layer	SRS475908		51.35	1	2281455	79850925		RNA-Seq	TRANSCRIPTOMIC	cDNA
SRR962272	SRX343341	GSM1221198: PD_(E8++); Caenorhabditis elegans; RNA-Seq	Caenorhabditis elegans	Illumina HiSeq 2000	GEO	SRP029448	Spatiotemporal embryonic transcriptomics reveals the evolutionary history of the endoderm germ layer	SRS475909		70.29	1	3164474	110756590		RNA-Seq	TRANSCRIPTOMIC	cDNA
SRR962273	SRX343342	GSM1221199: PDtr; Caenorhabditis elegans; RNA-Seq	Caenorhabditis elegans	Illumina HiSeq 2000	GEO	SRP029448	Spatiotemporal embryonic transcriptomics reveals the evolutionary history of the endoderm germ layer	SRS475910		39.26	1	1727577	60465195		RNA-Seq	TRANSCRIPTOMIC	cDNA
SRR1003098 SRR1003113	SRX360655	C. elegans transcription error rate, first round of RT	Caenorhabditis elegans	Illumina HiSeq 2000	Indiana University	SRP030526	Caenorhabditis elegans Transcriptome or Gene expression	SRS487992		14956.4	2	129328559	26124368918		RNA-Seq	TRANSCRIPTOMIC	RT-PCR
SRR1003268 SRR1003270	SRX360860	C. elegans transcription error rate, second round of RT	Caenorhabditis elegans	Illumina HiSeq 2000	Indiana University	SRP030526	Caenorhabditis elegans Transcriptome or Gene expression	SRS488057		22629.8	2	173761626	35099848452		RNA-Seq	TRANSCRIPTOMIC	RT-PCR
SRR1006135 SRR1006136	SRX362654	C. elegans transcription error rate, third round of RT	Caenorhabditis elegans	Illumina HiSeq 2000	Indiana University	SRP030526	Caenorhabditis elegans Transcriptome or Gene expression	SRS489469		2926.89	2	22112332	4466691064		RNA-Seq	TRANSCRIPTOMIC	RT-PCR
SRR1006196	SRX362655	C. elegans RB886 transcription error rate, first round of RT	Caenorhabditis elegans	Illumina HiSeq 2000	Indiana University	SRP030526	Caenorhabditis elegans Transcriptome or Gene expression	SRS489470		13520.6	1	110955988	22413109576		RNA-Seq	TRANSCRIPTOMIC	RT-PCR
SRR1006197	SRX362686	C. elegans RB886 transcription error rate, second round of RT	Caenorhabditis elegans	Illumina HiSeq 2000	Indiana University	SRP030526	Caenorhabditis elegans Transcriptome or Gene expression	SRS489483		12460.3	1	92914953	18768820506		RNA-Seq	TRANSCRIPTOMIC	RT-PCR
SRR1006198	SRX362687	C. elegans RB886 transcription error rate, third round of RT	Caenorhabditis elegans	Illumina HiSeq 2000	Indiana University	SRP030526	Caenorhabditis elegans Transcriptome or Gene expression	SRS489484		2954.13	1	21746278	4392748156		RNA-Seq	TRANSCRIPTOMIC	RT-PCR
SRR1006413	SRX362860	C. elegans VC1305 transcription error rate, third round of RT	Caenorhabditis elegans	Illumina HiSeq 2000	Indiana University	SRP030526	Caenorhabditis elegans Transcriptome or Gene expression	SRS489632		3064.21	1	22229137	4490285674		RNA-Seq	TRANSCRIPTOMIC	RT-PCR
SRR1006417	SRX362868	C. elegans VC1305 transcription error rate, first round of RT	Caenorhabditis elegans	Illumina HiSeq 2000	Indiana University	SRP030526	Caenorhabditis elegans Transcriptome or Gene expression	SRS489635		9250.98	1	72565372	14658205144		RNA-Seq	TRANSCRIPTOMIC	RT-PCR
SRR1010357	SRX362869	C. elegans VC1305 transcription error rate, second round of RT	Caenorhabditis elegans	Illumina HiSeq 2000	Indiana University	SRP030526	Caenorhabditis elegans Transcriptome or Gene expression	SRS489636		17491	1	127880141	25831788482		RNA-Seq	TRANSCRIPTOMIC	RT-PCR
SRR1015363	SRX366861	GSM1248093: adr1-/adr2- double knockout; Caenorhabditis elegans; RNA-Seq	Caenorhabditis elegans	Illumina HiSeq 2000	GEO	SRP031831	The dsRBP and inactive editor, ADR-1, utilizes dsRNA binding to regulate A-to-I RNA editing across the C. elegans transcriptome	SRS492989		12733.9	1	209781429	23075957190		RNA-Seq	TRANSCRIPTOMIC	cDNA
SRR1015364	SRX366862	GSM1248097: adr1- knockout worms; Caenorhabditis elegans; RNA-Seq	Caenorhabditis elegans	Illumina Genome Analyzer II	GEO	SRP031831	The dsRBP and inactive editor, ADR-1, utilizes dsRNA binding to regulate A-to-I RNA editing across the C. elegans transcriptome	SRS492990		1663.8	1	36479073	2772409548		RNA-Seq	TRANSCRIPTOMIC	cDNA
SRR1015365	SRX366863	GSM1248099: adt2- knockout worms; Caenorhabditis elegans; RNA-Seq	Caenorhabditis elegans	Illumina Genome Analyzer II	GEO	SRP031831	The dsRBP and inactive editor, ADR-1, utilizes dsRNA binding to regulate A-to-I RNA editing across the C. elegans transcriptome	SRS492991		1831.32	1	39667230	3014709480		RNA-Seq	TRANSCRIPTOMIC	cDNA
SRR1015366	SRX366864	GSM1248101: N2 wild type worms; Caenorhabditis elegans; RNA-Seq	Caenorhabditis elegans	Illumina Genome Analyzer II	GEO	SRP031831	The dsRBP and inactive editor, ADR-1, utilizes dsRNA binding to regulate A-to-I RNA editing across the C. elegans transcriptome	SRS492992	34542067	2625197092		RNA-Seq	TRANSCRIPTOMIC	cDNA
SRR1015367	SRX366865	GSM1248103: adr1/adr2 double mutant; Caenorhabditis elegans; RNA-Seq	Caenorhabditis elegans	Illumina Genome Analyzer II	GEO	SRP031831	The dsRBP and inactive editor, ADR-1, utilizes dsRNA binding to regulate A-to-I RNA editing across the C. elegans transcriptome	SRS492993		1726.79	1	38361013	2915436988		RNA-Seq	TRANSCRIPTOMIC	cDNA
SRR1015368	SRX366866	GSM1248105: adr1 dsRBD mutant; Caenorhabditis elegans; RNA-Seq	Caenorhabditis elegans	Illumina Genome Analyzer II	GEO	SRP031831	The dsRBP and inactive editor, ADR-1, utilizes dsRNA binding to regulate A-to-I RNA editing across the C. elegans transcriptome	SRS492994		1763.92	1	38703417	2941459692		RNA-Seq	TRANSCRIPTOMIC	cDNA
SRR1015369	SRX366867	GSM1248107: adr2 dsRBD mutant; Caenorhabditis elegans; RNA-Seq	Caenorhabditis elegans	Illumina Genome Analyzer II	GEO	SRP031831	The dsRBP and inactive editor, ADR-1, utilizes dsRNA binding to regulate A-to-I RNA editing across the C. elegans transcriptome	SRS492995		1700.47	1	37625864	2859565664		RNA-Seq	TRANSCRIPTOMIC	cDNA
SRR1015370	SRX366868	GSM1248109: FLAG ADR1- rescue; Caenorhabditis elegans; RNA-Seq	Caenorhabditis elegans	Illumina Genome Analyzer II	GEO	SRP031831	The dsRBP and inactive editor, ADR-1, utilizes dsRNA binding to regulate A-to-I RNA editing across the C. elegans transcriptome	SRS492996		1810.13	1	39313335	2987813460		RNA-Seq	TRANSCRIPTOMIC	cDNA
SRR1041180	SRX385551	GSM1277145: RNASeq_polyA_DauerExit_N2_12hr; Caenorhabditis elegans; RNA-Seq	Caenorhabditis elegans	Illumina HiSeq 2000	GEO	SRP033410	Extensive oscillatory gene expression during C. elegans larval development [RNA-seq for polyA enriched mRNAs]	SRS509657	28852119	1471458069		RNA-Seq	TRANSCRIPTOMIC	cDNA
SRR1041181	SRX385552	GSM1277146: RNASeq_polyA_DauerExit_N2_13hr; Caenorhabditis elegans; RNA-Seq	Caenorhabditis elegans	Illumina HiSeq 2000	GEO	SRP033410	Extensive oscillatory gene expression during C. elegans larval development [RNA-seq for polyA enriched mRNAs]	SRS509658	29851506	1522426806		RNA-Seq	TRANSCRIPTOMIC	cDNA
SRR1041182	SRX385553	GSM1277147: RNASeq_polyA_DauerExit_N2_14hr; Caenorhabditis elegans; RNA-Seq	Caenorhabditis elegans	Illumina HiSeq 2000	GEO	SRP033410	Extensive oscillatory gene expression during C. elegans larval development [RNA-seq for polyA enriched mRNAs]	SRS509659	26517354	1352385054		RNA-Seq	TRANSCRIPTOMIC	cDNA
SRR1041151	SRX385554	GSM1277118: RNASeq_polyA_contDevA_N2_21hr; Caenorhabditis elegans; RNA-Seq	Caenorhabditis elegans	Illumina HiSeq 2000	GEO	SRP033410	Extensive oscillatory gene expression during C. elegans larval development [RNA-seq for polyA enriched mRNAs]	SRS509660	28366105	1418305250		RNA-Seq	TRANSCRIPTOMIC	cDNA
SRR1041152	SRX385555	GSM1277119: RNASeq_polyA_contDevA_N2_22hr; Caenorhabditis elegans; RNA-Seq	Caenorhabditis elegans	Illumina HiSeq 2000	GEO	SRP033410	Extensive oscillatory gene expression during C. elegans larval development [RNA-seq for polyA enriched mRNAs]	SRS509661	29590020	1479501000		RNA-Seq	TRANSCRIPTOMIC	cDNA
SRR1041153	SRX385556	GSM1277120: RNASeq_polyA_contDevA_N2_23hr; Caenorhabditis elegans; RNA-Seq	Caenorhabditis elegans	Illumina HiSeq 2000	GEO	SRP033410	Extensive oscillatory gene expression during C. elegans larval development [RNA-seq for polyA enriched mRNAs]	SRS509662	31034226	1551711300		RNA-Seq	TRANSCRIPTOMIC	cDNA
SRR1041154	SRX385557	GSM1277121: RNASeq_polyA_contDevA_N2_24hr; Caenorhabditis elegans; RNA-Seq	Caenorhabditis elegans	Illumina HiSeq 2000	GEO	SRP033410	Extensive oscillatory gene expression during C. elegans larval development [RNA-seq for polyA enriched mRNAs]	SRS509663	23339898	1166994900		RNA-Seq	TRANSCRIPTOMIC	cDNA
SRR1041155	SRX385558	GSM1277122: RNASeq_polyA_contDevA_N2_25hr; Caenorhabditis elegans; RNA-Seq	Caenorhabditis elegans	Illumina HiSeq 2000	GEO	SRP033410	Extensive oscillatory gene expression during C. elegans larval development [RNA-seq for polyA enriched mRNAs]	SRS509664	36666104	1833305200		RNA-Seq	TRANSCRIPTOMIC	cDNA
SRR1041156	SRX385559	GSM1277123: RNASeq_polyA_contDevA_N2_26hr; Caenorhabditis elegans; RNA-Seq	Caenorhabditis elegans	Illumina HiSeq 2000	GEO	SRP033410	Extensive oscillatory gene expression during C. elegans larval development [RNA-seq for polyA enriched mRNAs]	SRS509665	31313145	1565657250		RNA-Seq	TRANSCRIPTOMIC	cDNA
SRR1041157	SRX385560	GSM1277124: RNASeq_polyA_contDevA_N2_27hr; Caenorhabditis elegans; RNA-Seq	Caenorhabditis elegans	Illumina HiSeq 2000	GEO	SRP033410	Extensive oscillatory gene expression during C. elegans larval development [RNA-seq for polyA enriched mRNAs]	SRS509666	31452680	1572634000		RNA-Seq	TRANSCRIPTOMIC	cDNA
SRR1041158	SRX385561	GSM1277125: RNASeq_polyA_contDevA_N2_28hr; Caenorhabditis elegans; RNA-Seq	Caenorhabditis elegans	Illumina HiSeq 2000	GEO	SRP033410	Extensive oscillatory gene expression during C. elegans larval development [RNA-seq for polyA enriched mRNAs]	SRS509667	26620501	1331025050		RNA-Seq	TRANSCRIPTOMIC	cDNA
SRR1041159	SRX385562	GSM1277126: RNASeq_polyA_contDevA_N2_29hr; Caenorhabditis elegans; RNA-Seq	Caenorhabditis elegans	Illumina HiSeq 2000	GEO	SRP033410	Extensive oscillatory gene expression during C. elegans larval development [RNA-seq for polyA enriched mRNAs]	SRS509668	33680534	1684026700		RNA-Seq	TRANSCRIPTOMIC	cDNA
SRR1041160	SRX385563	GSM1277127: RNASeq_polyA_contDevA_N2_30hr; Caenorhabditis elegans; RNA-Seq	Caenorhabditis elegans	Illumina HiSeq 2000	GEO	SRP033410	Extensive oscillatory gene expression during C. elegans larval development [RNA-seq for polyA enriched mRNAs]	SRS509669	37579129	1878956450		RNA-Seq	TRANSCRIPTOMIC	cDNA
SRR1041161	SRX385564	GSM1277128: RNASeq_polyA_contDevA_N2_31hr; Caenorhabditis elegans; RNA-Seq	Caenorhabditis elegans	Illumina HiSeq 2000	GEO	SRP033410	Extensive oscillatory gene expression during C. elegans larval development [RNA-seq for polyA enriched mRNAs]	SRS509670	33694850	1684742500		RNA-Seq	TRANSCRIPTOMIC	cDNA
SRR1041162	SRX385565	GSM1277129: RNASeq_polyA_contDevA_N2_32hr; Caenorhabditis elegans; RNA-Seq	Caenorhabditis elegans	Illumina HiSeq 2000	GEO	SRP033410	Extensive oscillatory gene expression during C. elegans larval development [RNA-seq for polyA enriched mRNAs]	SRS509671	43762444	2188122200		RNA-Seq	TRANSCRIPTOMIC	cDNA
SRR1041163	SRX385566	GSM1277130: RNASeq_polyA_contDevA_N2_33hr; Caenorhabditis elegans; RNA-Seq	Caenorhabditis elegans	Illumina HiSeq 2000	GEO	SRP033410	Extensive oscillatory gene expression during C. elegans larval development [RNA-seq for polyA enriched mRNAs]	SRS509672	44079707	2203985350		RNA-Seq	TRANSCRIPTOMIC	cDNA
SRR1041164 SRR1041165	SRX385567	GSM1277131: RNASeq_polyA_contDevA_N2_34hr; Caenorhabditis elegans; RNA-Seq	Caenorhabditis elegans	Illumina HiSeq 2000	GEO	SRP033410	Extensive oscillatory gene expression during C. elegans larval development [RNA-seq for polyA enriched mRNAs]	SRS509673	56499351	2824967550		RNA-Seq	TRANSCRIPTOMIC	cDNA
SRR1041166	SRX385568	GSM1277132: RNASeq_polyA_contDevA_N2_35hr; Caenorhabditis elegans; RNA-Seq	Caenorhabditis elegans	Illumina HiSeq 2000	GEO	SRP033410	Extensive oscillatory gene expression during C. elegans larval development [RNA-seq for polyA enriched mRNAs]	SRS509675	38762589	1938129450		RNA-Seq	TRANSCRIPTOMIC	cDNA
SRR1041167 SRR1041168	SRX385569	GSM1277133: RNASeq_polyA_contDevA_N2_36hr; Caenorhabditis elegans; RNA-Seq	Caenorhabditis elegans	Illumina HiSeq 2000	GEO	SRP033410	Extensive oscillatory gene expression during C. elegans larval development [RNA-seq for polyA enriched mRNAs]	SRS509674	50728105	2536405250		RNA-Seq	TRANSCRIPTOMIC	cDNA
SRR1041169	SRX385570	GSM1277134: RNASeq_polyA_DauerExit_N2_1hr; Caenorhabditis elegans; RNA-Seq	Caenorhabditis elegans	Illumina HiSeq 2000	GEO	SRP033410	Extensive oscillatory gene expression during C. elegans larval development [RNA-seq for polyA enriched mRNAs]	SRS509676	33409253	1703871903		RNA-Seq	TRANSCRIPTOMIC	cDNA
SRR1041170	SRX385571	GSM1277135: RNASeq_polyA_DauerExit_N2_2hr; Caenorhabditis elegans; RNA-Seq	Caenorhabditis elegans	Illumina HiSeq 2000	GEO	SRP033410	Extensive oscillatory gene expression during C. elegans larval development [RNA-seq for polyA enriched mRNAs]	SRS509677	28813158	1469471058		RNA-Seq	TRANSCRIPTOMIC	cDNA
SRR1041171	SRX385572	GSM1277136: RNASeq_polyA_DauerExit_N2_3hr; Caenorhabditis elegans; RNA-Seq	Caenorhabditis elegans	Illumina HiSeq 2000	GEO	SRP033410	Extensive oscillatory gene expression during C. elegans larval development [RNA-seq for polyA enriched mRNAs]	SRS509678	31587786	1610977086		RNA-Seq	TRANSCRIPTOMIC	cDNA
SRR1041172	SRX385573	GSM1277137: RNASeq_polyA_DauerExit_N2_4hr; Caenorhabditis elegans; RNA-Seq	Caenorhabditis elegans	Illumina HiSeq 2000	GEO	SRP033410	Extensive oscillatory gene expression during C. elegans larval development [RNA-seq for polyA enriched mRNAs]	SRS509679	29391640	1498973640		RNA-Seq	TRANSCRIPTOMIC	cDNA
SRR1041173	SRX385574	GSM1277138: RNASeq_polyA_DauerExit_N2_5hr; Caenorhabditis elegans; RNA-Seq	Caenorhabditis elegans	Illumina HiSeq 2000	GEO	SRP033410	Extensive oscillatory gene expression during C. elegans larval development [RNA-seq for polyA enriched mRNAs]	SRS509680	31109266	1586572566		RNA-Seq	TRANSCRIPTOMIC	cDNA
SRR1041174	SRX385575	GSM1277139: RNASeq_polyA_DauerExit_N2_6hr; Caenorhabditis elegans; RNA-Seq	Caenorhabditis elegans	Illumina HiSeq 2000	GEO	SRP033410	Extensive oscillatory gene expression during C. elegans larval development [RNA-seq for polyA enriched mRNAs]	SRS509681	25441953	1297539603		RNA-Seq	TRANSCRIPTOMIC	cDNA
SRR1041175	SRX385576	GSM1277140: RNASeq_polyA_DauerExit_N2_7hr; Caenorhabditis elegans; RNA-Seq	Caenorhabditis elegans	Illumina HiSeq 2000	GEO	SRP033410	Extensive oscillatory gene expression during C. elegans larval development [RNA-seq for polyA enriched mRNAs]	SRS509682	27309993	1392809643		RNA-Seq	TRANSCRIPTOMIC	cDNA
SRR1041176	SRX385577	GSM1277141: RNASeq_polyA_DauerExit_N2_8hr; Caenorhabditis elegans; RNA-Seq	Caenorhabditis elegans	Illumina HiSeq 2000	GEO	SRP033410	Extensive oscillatory gene expression during C. elegans larval development [RNA-seq for polyA enriched mRNAs]	SRS509683	27875358	1421643258		RNA-Seq	TRANSCRIPTOMIC	cDNA
SRR1041177	SRX385578	GSM1277142: RNASeq_polyA_DauerExit_N2_9hr; Caenorhabditis elegans; RNA-Seq	Caenorhabditis elegans	Illumina HiSeq 2000	GEO	SRP033410	Extensive oscillatory gene expression during C. elegans larval development [RNA-seq for polyA enriched mRNAs]	SRS509684	31514160	1607222160		RNA-Seq	TRANSCRIPTOMIC	cDNA
SRR1041178	SRX385579	GSM1277143: RNASeq_polyA_DauerExit_N2_10hr; Caenorhabditis elegans; RNA-Seq	Caenorhabditis elegans	Illumina HiSeq 2000	GEO	SRP033410	Extensive oscillatory gene expression during C. elegans larval development [RNA-seq for polyA enriched mRNAs]	SRS509685	28659421	1461630471		RNA-Seq	TRANSCRIPTOMIC	cDNA
SRR1041179	SRX385580	GSM1277144: RNASeq_polyA_DauerExit_N2_11hr; Caenorhabditis elegans; RNA-Seq	Caenorhabditis elegans	Illumina HiSeq 2000	GEO	SRP033410	Extensive oscillatory gene expression during C. elegans larval development [RNA-seq for polyA enriched mRNAs]	SRS509686	30067323	1533433473		RNA-Seq	TRANSCRIPTOMIC	cDNA
SRR1041183	SRX385581	GSM1277148: RNASeq_polyA_DauerExit_N2_15hr; Caenorhabditis elegans; RNA-Seq	Caenorhabditis elegans	Illumina HiSeq 2000	GEO	SRP033410	Extensive oscillatory gene expression during C. elegans larval development [RNA-seq for polyA enriched mRNAs]	SRS509687	27529807	1404020157		RNA-Seq	TRANSCRIPTOMIC	cDNA
SRR1041184	SRX385582	GSM1277149: RNASeq_polyA_DauerExit_N2_16hr; Caenorhabditis elegans; RNA-Seq	Caenorhabditis elegans	Illumina HiSeq 2000	GEO	SRP033410	Extensive oscillatory gene expression during C. elegans larval development [RNA-seq for polyA enriched mRNAs]	SRS509688	28077214	1431937914		RNA-Seq	TRANSCRIPTOMIC	cDNA
SRR1041185	SRX385583	GSM1277150: RNASeq_polyA_DauerExit_N2_17hr; Caenorhabditis elegans; RNA-Seq	Caenorhabditis elegans	Illumina HiSeq 2000	GEO	SRP033410	Extensive oscillatory gene expression during C. elegans larval development [RNA-seq for polyA enriched mRNAs]	SRS509689	31558571	1609487121		RNA-Seq	TRANSCRIPTOMIC	cDNA
SRR1041186	SRX385584	GSM1277151: RNASeq_polyA_DauerExit_N2_18hr; Caenorhabditis elegans; RNA-Seq	Caenorhabditis elegans	Illumina HiSeq 2000	GEO	SRP033410	Extensive oscillatory gene expression during C. elegans larval development [RNA-seq for polyA enriched mRNAs]	SRS509690	28786832	1468128432		RNA-Seq	TRANSCRIPTOMIC	cDNA
SRR1041187	SRX385585	GSM1277152: RNASeq_polyA_DauerExit_N2_19hr; Caenorhabditis elegans; RNA-Seq	Caenorhabditis elegans	Illumina HiSeq 2000	GEO	SRP033410	Extensive oscillatory gene expression during C. elegans larval development [RNA-seq for polyA enriched mRNAs]	SRS509691	29141637	1486223487		RNA-Seq	TRANSCRIPTOMIC	cDNA
SRR1041188	SRX385586	GSM1277153: RNASeq_polyA_DauerExit_N2_20hr; Caenorhabditis elegans; RNA-Seq	Caenorhabditis elegans	Illumina HiSeq 2000	GEO	SRP033410	Extensive oscillatory gene expression during C. elegans larval development [RNA-seq for polyA enriched mRNAs]	SRS509692	28735845	1465528095		RNA-Seq	TRANSCRIPTOMIC	cDNA
SRR1041189	SRX385587	GSM1277154: RNASeq_polyA_DauerExit_N2_21hr; Caenorhabditis elegans; RNA-Seq	Caenorhabditis elegans	Illumina HiSeq 2000	GEO	SRP033410	Extensive oscillatory gene expression during C. elegans larval development [RNA-seq for polyA enriched mRNAs]	SRS509693	28389596	1447869396		RNA-Seq	TRANSCRIPTOMIC	cDNA
SRR1041190	SRX385588	GSM1277155: RNASeq_polyA_DauerExit_N2_22hr; Caenorhabditis elegans; RNA-Seq	Caenorhabditis elegans	Illumina HiSeq 2000	GEO	SRP033410	Extensive oscillatory gene expression during C. elegans larval development [RNA-seq for polyA enriched mRNAs]	SRS509694	27480999	1401530949		RNA-Seq	TRANSCRIPTOMIC	cDNA
SRR1041191 SRR1041192	SRX385589	GSM1277156: RNASeq_polyA_contDev_glp-4_40hr; Caenorhabditis elegans; RNA-Seq	Caenorhabditis elegans	Illumina HiSeq 2000	GEO	SRP033410	Extensive oscillatory gene expression during C. elegans larval development [RNA-seq for polyA enriched mRNAs]	SRS509695		1734.59	2	48140560	2455168560		RNA-Seq	TRANSCRIPTOMIC	cDNA
SRR1041193 SRR1041194	SRX385590	GSM1277157: RNASeq_polyA_contDev_glp-4_42hr; Caenorhabditis elegans; RNA-Seq	Caenorhabditis elegans	Illumina HiSeq 2000	GEO	SRP033410	Extensive oscillatory gene expression during C. elegans larval development [RNA-seq for polyA enriched mRNAs]	SRS509696		1920.04	2	53561903	2731657053		RNA-Seq	TRANSCRIPTOMIC	cDNA
SRR1041195 SRR1041196	SRX385591	GSM1277158: RNASeq_polyA_contDev_glp-4_44hr; Caenorhabditis elegans; RNA-Seq	Caenorhabditis elegans	Illumina HiSeq 2000	GEO	SRP033410	Extensive oscillatory gene expression during C. elegans larval development [RNA-seq for polyA enriched mRNAs]	SRS509698		1972.8	2	54913171	2800571721		RNA-Seq	TRANSCRIPTOMIC	cDNA
SRR1041197 SRR1041198	SRX385592	GSM1277159: RNASeq_polyA_contDev_glp-4_46hr; Caenorhabditis elegans; RNA-Seq	Caenorhabditis elegans	Illumina HiSeq 2000	GEO	SRP033410	Extensive oscillatory gene expression during C. elegans larval development [RNA-seq for polyA enriched mRNAs]	SRS509697		1795.86	2	49747182	2537106282		RNA-Seq	TRANSCRIPTOMIC	cDNA
SRR1041199 SRR1041200	SRX385593	GSM1277160: RNASeq_polyA_contDev_glp-4_48hr; Caenorhabditis elegans; RNA-Seq	Caenorhabditis elegans	Illumina HiSeq 2000	GEO	SRP033410	Extensive oscillatory gene expression during C. elegans larval development [RNA-seq for polyA enriched mRNAs]	SRS509699		2010.59	2	56996081	2906800131		RNA-Seq	TRANSCRIPTOMIC	cDNA
SRR1041201 SRR1041202	SRX385594	GSM1277161: RNASeq_polyA_contDev_glp-4_50hr; Caenorhabditis elegans; RNA-Seq	Caenorhabditis elegans	Illumina HiSeq 2000	GEO	SRP033410	Extensive oscillatory gene expression during C. elegans larval development [RNA-seq for polyA enriched mRNAs]	SRS509700		1345.36	2	37069155	1890526905		RNA-Seq	TRANSCRIPTOMIC	cDNA
SRR1041203 SRR1041204	SRX385595	GSM1277162: RNASeq_polyA_contDev_glp-4_52hr; Caenorhabditis elegans; RNA-Seq	Caenorhabditis elegans	Illumina HiSeq 2000	GEO	SRP033410	Extensive oscillatory gene expression during C. elegans larval development [RNA-seq for polyA enriched mRNAs]	SRS509701		1621.34	2	44877833	2288769483		RNA-Seq	TRANSCRIPTOMIC	cDNA
SRR1041221 SRR1041222	SRX385606	GSM1277173: RNASeq_riboM_contDevA_N2_21hr; Caenorhabditis elegans; RNA-Seq	Caenorhabditis elegans	Illumina HiSeq 2000	GEO	SRP033412	Developmental Timecourses total-RNA sequencing [Ribosome repleted total RNA]	SRS509712	56772541	2895399591		RNA-Seq	TRANSCRIPTOMIC	cDNA
SRR1041223	SRX385607	GSM1277174: RNASeq_riboM_contDevA_N2_22hr; Caenorhabditis elegans; RNA-Seq	Caenorhabditis elegans	Illumina HiSeq 2000	GEO	SRP033412	Developmental Timecourses total-RNA sequencing [Ribosome repleted total RNA]	SRS509713	35664681	1818898731		RNA-Seq	TRANSCRIPTOMIC	cDNA
SRR1041224	SRX385608	GSM1277175: RNASeq_riboM_contDevA_N2_23hr; Caenorhabditis elegans; RNA-Seq	Caenorhabditis elegans	Illumina HiSeq 2000	GEO	SRP033412	Developmental Timecourses total-RNA sequencing [Ribosome repleted total RNA]	SRS509714	45598971	2325547521		RNA-Seq	TRANSCRIPTOMIC	cDNA
SRR1041225	SRX385609	GSM1277176: RNASeq_riboM_contDevA_N2_24hr; Caenorhabditis elegans; RNA-Seq	Caenorhabditis elegans	Illumina HiSeq 2000	GEO	SRP033412	Developmental Timecourses total-RNA sequencing [Ribosome repleted total RNA]	SRS509715	31030773	1582569423		RNA-Seq	TRANSCRIPTOMIC	cDNA
SRR1041226	SRX385610	GSM1277177: RNASeq_riboM_contDevA_N2_25hr; Caenorhabditis elegans; RNA-Seq	Caenorhabditis elegans	Illumina HiSeq 2000	GEO	SRP033412	Developmental Timecourses total-RNA sequencing [Ribosome repleted total RNA]	SRS509716	36931478	1883505378		RNA-Seq	TRANSCRIPTOMIC	cDNA
SRR1041227 SRR1041228	SRX385611	GSM1277178: RNASeq_riboM_contDevA_N2_26hr; Caenorhabditis elegans; RNA-Seq	Caenorhabditis elegans	Illumina HiSeq 2000	GEO	SRP033412	Developmental Timecourses total-RNA sequencing [Ribosome repleted total RNA]	SRS509717	60340736	3077377536		RNA-Seq	TRANSCRIPTOMIC	cDNA
SRR1041229	SRX385612	GSM1277179: RNASeq_riboM_contDevA_N2_27hr; Caenorhabditis elegans; RNA-Seq	Caenorhabditis elegans	Illumina HiSeq 2000	GEO	SRP033412	Developmental Timecourses total-RNA sequencing [Ribosome repleted total RNA]	SRS509718	47793774	2437482474		RNA-Seq	TRANSCRIPTOMIC	cDNA
SRR1041230	SRX385613	GSM1277180: RNASeq_riboM_contDevA_N2_28hr; Caenorhabditis elegans; RNA-Seq	Caenorhabditis elegans	Illumina HiSeq 2000	GEO	SRP033412	Developmental Timecourses total-RNA sequencing [Ribosome repleted total RNA]	SRS509719	45324044	2311526244		RNA-Seq	TRANSCRIPTOMIC	cDNA
SRR1041231 SRR1041232	SRX385614	GSM1277181: RNASeq_riboM_contDevA_N2_29hr; Caenorhabditis elegans; RNA-Seq	Caenorhabditis elegans	Illumina HiSeq 2000	GEO	SRP033412	Developmental Timecourses total-RNA sequencing [Ribosome repleted total RNA]	SRS509720	57851551	2950429101		RNA-Seq	TRANSCRIPTOMIC	cDNA
SRR1041233	SRX385615	GSM1277182: RNASeq_riboM_contDevA_N2_30hr; Caenorhabditis elegans; RNA-Seq	Caenorhabditis elegans	Illumina HiSeq 2000	GEO	SRP033412	Developmental Timecourses total-RNA sequencing [Ribosome repleted total RNA]	SRS509721	40109169	2045567619		RNA-Seq	TRANSCRIPTOMIC	cDNA
SRR1041234	SRX385616	GSM1277183: RNASeq_riboM_contDevA_N2_31hr; Caenorhabditis elegans; RNA-Seq	Caenorhabditis elegans	Illumina HiSeq 2000	GEO	SRP033412	Developmental Timecourses total-RNA sequencing [Ribosome repleted total RNA]	SRS509722	46037894	2347932594		RNA-Seq	TRANSCRIPTOMIC	cDNA
SRR1041235	SRX385617	GSM1277184: RNASeq_riboM_contDevA_N2_32hr; Caenorhabditis elegans; RNA-Seq	Caenorhabditis elegans	Illumina HiSeq 2000	GEO	SRP033412	Developmental Timecourses total-RNA sequencing [Ribosome repleted total RNA]	SRS509723	41148163	2098556313		RNA-Seq	TRANSCRIPTOMIC	cDNA
SRR1041236	SRX385618	GSM1277185: RNASeq_riboM_contDevA_N2_33hr; Caenorhabditis elegans; RNA-Seq	Caenorhabditis elegans	Illumina HiSeq 2000	GEO	SRP033412	Developmental Timecourses total-RNA sequencing [Ribosome repleted total RNA]	SRS509724	49915911	2545711461		RNA-Seq	TRANSCRIPTOMIC	cDNA
SRR1041237	SRX385619	GSM1277186: RNASeq_riboM_contDevA_N2_34hr; Caenorhabditis elegans; RNA-Seq	Caenorhabditis elegans	Illumina HiSeq 2000	GEO	SRP033412	Developmental Timecourses total-RNA sequencing [Ribosome repleted total RNA]	SRS509725	38651907	1971247257		RNA-Seq	TRANSCRIPTOMIC	cDNA
SRR1041238 SRR1041239	SRX385620	GSM1277187: RNASeq_riboM_contDevA_N2_35hr; Caenorhabditis elegans; RNA-Seq	Caenorhabditis elegans	Illumina HiSeq 2000	GEO	SRP033412	Developmental Timecourses total-RNA sequencing [Ribosome repleted total RNA]	SRS509726	61580215	3140590965		RNA-Seq	TRANSCRIPTOMIC	cDNA
SRR1041240	SRX385621	GSM1277188: RNASeq_riboM_contDevA_N2_36hr; Caenorhabditis elegans; RNA-Seq	Caenorhabditis elegans	Illumina HiSeq 2000	GEO	SRP033412	Developmental Timecourses total-RNA sequencing [Ribosome repleted total RNA]	SRS509727	48744801	2485984851		RNA-Seq	TRANSCRIPTOMIC	cDNA
SRR1041241 SRR1041242	SRX385622	GSM1277189: RNASeq_riboM_contDevB_N2_18hr; Caenorhabditis elegans; RNA-Seq	Caenorhabditis elegans	Illumina HiSeq 2000	GEO	SRP033412	Developmental Timecourses total-RNA sequencing [Ribosome repleted total RNA]	SRS509728	64661320	3297727320		RNA-Seq	TRANSCRIPTOMIC	cDNA
SRR1041243 SRR1041244	SRX385623	GSM1277190: RNASeq_riboM_contDevB_N2_20hr; Caenorhabditis elegans; RNA-Seq	Caenorhabditis elegans	Illumina HiSeq 2000	GEO	SRP033412	Developmental Timecourses total-RNA sequencing [Ribosome repleted total RNA]	SRS509729	61200297	3121215147		RNA-Seq	TRANSCRIPTOMIC	cDNA
SRR1041245 SRR1041246	SRX385624	GSM1277191: RNASeq_riboM_contDevB_N2_22hr; Caenorhabditis elegans; RNA-Seq	Caenorhabditis elegans	Illumina HiSeq 2000	GEO	SRP033412	Developmental Timecourses total-RNA sequencing [Ribosome repleted total RNA]	SRS509730	53958820	2751899820		RNA-Seq	TRANSCRIPTOMIC	cDNA
SRR1041247 SRR1041248	SRX385625	GSM1277192: RNASeq_riboM_contDevB_N2_24hr; Caenorhabditis elegans; RNA-Seq	Caenorhabditis elegans	Illumina HiSeq 2000	GEO	SRP033412	Developmental Timecourses total-RNA sequencing [Ribosome repleted total RNA]	SRS509731	52084570	2656313070		RNA-Seq	TRANSCRIPTOMIC	cDNA
SRR1041249	SRX385626	GSM1277193: RNASeq_riboM_contDevB_N2_26hr; Caenorhabditis elegans; RNA-Seq	Caenorhabditis elegans	Illumina HiSeq 2000	GEO	SRP033412	Developmental Timecourses total-RNA sequencing [Ribosome repleted total RNA]	SRS509732	49466571	2522795121		RNA-Seq	TRANSCRIPTOMIC	cDNA
SRR1041250 SRR1041251	SRX385627	GSM1277194: RNASeq_riboM_contDevB_N2_28hr; Caenorhabditis elegans; RNA-Seq	Caenorhabditis elegans	Illumina HiSeq 2000	GEO	SRP033412	Developmental Timecourses total-RNA sequencing [Ribosome repleted total RNA]	SRS509733	54804620	2795035620		RNA-Seq	TRANSCRIPTOMIC	cDNA
SRR1041252	SRX385628	GSM1277195: RNASeq_riboM_contDevB_N2_30hr; Caenorhabditis elegans; RNA-Seq	Caenorhabditis elegans	Illumina HiSeq 2000	GEO	SRP033412	Developmental Timecourses total-RNA sequencing [Ribosome repleted total RNA]	SRS509734	49283454	2513456154		RNA-Seq	TRANSCRIPTOMIC	cDNA
SRR1041253 SRR1041254	SRX385629	GSM1277196: RNASeq_riboM_contDevB_N2_32hr; Caenorhabditis elegans; RNA-Seq	Caenorhabditis elegans	Illumina HiSeq 2000	GEO	SRP033412	Developmental Timecourses total-RNA sequencing [Ribosome repleted total RNA]	SRS509735	53724568	2739952968		RNA-Seq	TRANSCRIPTOMIC	cDNA
SRR1041255 SRR1041256	SRX385630	GSM1277197: RNASeq_riboM_contDevB_N2_34hr; Caenorhabditis elegans; RNA-Seq	Caenorhabditis elegans	Illumina HiSeq 2000	GEO	SRP033412	Developmental Timecourses total-RNA sequencing [Ribosome repleted total RNA]	SRS509736	55315601	2821095651		RNA-Seq	TRANSCRIPTOMIC	cDNA
SRR1041257 SRR1041258	SRX385631	GSM1277198: RNASeq_riboM_contDevB_N2_36hr; Caenorhabditis elegans; RNA-Seq	Caenorhabditis elegans	Illumina HiSeq 2000	GEO	SRP033412	Developmental Timecourses total-RNA sequencing [Ribosome repleted total RNA]	SRS509737	60484470	3084707970		RNA-Seq	TRANSCRIPTOMIC	cDNA
SRR1041687 SRR1041688	SRX386026	GSM1277907: Footprint_contDevB_N2_18hr; Caenorhabditis elegans; RNA-Seq	Caenorhabditis elegans	Illumina HiSeq 2000	GEO	SRP033430	Extensive oscillatory gene expression during C. elegans larval development [Ribosome footprinting]	SRS510036	55708628	2841140028		RNA-Seq	TRANSCRIPTOMIC	cDNA
SRR1041689	SRX386027	GSM1277908: Footprint_contDevB_N2_20hr; Caenorhabditis elegans; RNA-Seq	Caenorhabditis elegans	Illumina HiSeq 2000	GEO	SRP033430	Extensive oscillatory gene expression during C. elegans larval development [Ribosome footprinting]	SRS510035	36702479	1871826429		RNA-Seq	TRANSCRIPTOMIC	cDNA
SRR1041690 SRR1041691	SRX386028	GSM1277909: Footprint_contDevB_N2_22hr; Caenorhabditis elegans; RNA-Seq	Caenorhabditis elegans	Illumina HiSeq 2000	GEO	SRP033430	Extensive oscillatory gene expression during C. elegans larval development [Ribosome footprinting]	SRS510037	51942559	2649070509		RNA-Seq	TRANSCRIPTOMIC	cDNA
SRR1041692	SRX386029	GSM1277910: Footprint_contDevB_N2_24hr; Caenorhabditis elegans; RNA-Seq	Caenorhabditis elegans	Illumina HiSeq 2000	GEO	SRP033430	Extensive oscillatory gene expression during C. elegans larval development [Ribosome footprinting]	SRS510038	33630499	1715155449		RNA-Seq	TRANSCRIPTOMIC	cDNA
SRR1041693 SRR1041694	SRX386030	GSM1277911: Footprint_contDevB_N2_26hr; Caenorhabditis elegans; RNA-Seq	Caenorhabditis elegans	Illumina HiSeq 2000	GEO	SRP033430	Extensive oscillatory gene expression during C. elegans larval development [Ribosome footprinting]	SRS510040	58796828	2998638228		RNA-Seq	TRANSCRIPTOMIC	cDNA
SRR1041695	SRX386031	GSM1277912: Footprint_contDevB_N2_28hr; Caenorhabditis elegans; RNA-Seq	Caenorhabditis elegans	Illumina HiSeq 2000	GEO	SRP033430	Extensive oscillatory gene expression during C. elegans larval development [Ribosome footprinting]	SRS510039	46262444	2359384644		RNA-Seq	TRANSCRIPTOMIC	cDNA
SRR1041696	SRX386032	GSM1277913: Footprint_contDevB_N2_30hr; Caenorhabditis elegans; RNA-Seq	Caenorhabditis elegans	Illumina HiSeq 2000	GEO	SRP033430	Extensive oscillatory gene expression during C. elegans larval development [Ribosome footprinting]	SRS510042	38340984	1955390184		RNA-Seq	TRANSCRIPTOMIC	cDNA
SRR1041697	SRX386033	GSM1277914: Footprint_contDevB_N2_32hr; Caenorhabditis elegans; RNA-Seq	Caenorhabditis elegans	Illumina HiSeq 2000	GEO	SRP033430	Extensive oscillatory gene expression during C. elegans larval development [Ribosome footprinting]	SRS510041	43103122	2198259222		RNA-Seq	TRANSCRIPTOMIC	cDNA
SRR1041698 SRR1041699	SRX386034	GSM1277915: Footprint_contDevB_N2_34hr; Caenorhabditis elegans; RNA-Seq	Caenorhabditis elegans	Illumina HiSeq 2000	GEO	SRP033430	Extensive oscillatory gene expression during C. elegans larval development [Ribosome footprinting]	SRS510043	53018290	2703932790		RNA-Seq	TRANSCRIPTOMIC	cDNA
SRR1041700	SRX386035	GSM1277916: Footprint_contDevB_N2_36hr; Caenorhabditis elegans; RNA-Seq	Caenorhabditis elegans	Illumina HiSeq 2000	GEO	SRP033430	Extensive oscillatory gene expression during C. elegans larval development [Ribosome footprinting]	SRS510044	36658171	1869566721		RNA-Seq	TRANSCRIPTOMIC	cDNA
SRR1050768	SRX392693	GSM1290033: C. elegans mixed embryos (sample A, replicate 1); Caenorhabditis elegans; RNA-Seq	Caenorhabditis elegans	Illumina Genome Analyzer IIx	GEO	SRP034522	Conservation of mRNA and protein expression during development of C. elegans	SRS515683		1299.41	1	27076598	2057821448		RNA-Seq	TRANSCRIPTOMIC	cDNA
SRR1050769	SRX392694	GSM1290034: C. elegans mixed embryos (sample A, replicate 2); Caenorhabditis elegans; RNA-Seq	Caenorhabditis elegans	Illumina Genome Analyzer IIx	GEO	SRP034522	Conservation of mRNA and protein expression during development of C. elegans	SRS515684		4303.22	1	46271268	6755605128		RNA-Seq	TRANSCRIPTOMIC	cDNA
SRR1050770	SRX392695	GSM1290035: C. elegans mixed embryos (sample B); Caenorhabditis elegans; RNA-Seq	Caenorhabditis elegans	Illumina Genome Analyzer IIx	GEO	SRP034522	Conservation of mRNA and protein expression during development of C. elegans	SRS515685		4880.9	1	51202173	7475517258		RNA-Seq	TRANSCRIPTOMIC	cDNA
SRR1050771	SRX392696	GSM1290036: C. elegans L1 larvae (sample A, replicate 1); Caenorhabditis elegans; RNA-Seq	Caenorhabditis elegans	Illumina Genome Analyzer IIx	GEO	SRP034522	Conservation of mRNA and protein expression during development of C. elegans	SRS515686		1303.24	1	27094012	2059144912		RNA-Seq	TRANSCRIPTOMIC	cDNA
SRR1050772	SRX392697	GSM1290037: C. elegans L1 larvae (sample A, replicate 2); Caenorhabditis elegans; RNA-Seq	Caenorhabditis elegans	Illumina Genome Analyzer IIx	GEO	SRP034522	Conservation of mRNA and protein expression during development of C. elegans	SRS515687		4346.45	1	46213054	6747105884		RNA-Seq	TRANSCRIPTOMIC	cDNA
SRR1050773	SRX392698	GSM1290038: C. elegans L1 larvae (sample B); Caenorhabditis elegans; RNA-Seq	Caenorhabditis elegans	Illumina Genome Analyzer IIx	GEO	SRP034522	Conservation of mRNA and protein expression during development of C. elegans	SRS515688		4536.7	1	48101699	7022848054		RNA-Seq	TRANSCRIPTOMIC	cDNA
SRR1050774	SRX392699	GSM1290039: C. elegans L2 larvae (sample A); Caenorhabditis elegans; RNA-Seq	Caenorhabditis elegans	Illumina Genome Analyzer IIx	GEO	SRP034522	Conservation of mRNA and protein expression during development of C. elegans	SRS515689		1326.53	1	27078348	2057954448		RNA-Seq	TRANSCRIPTOMIC	cDNA
SRR1050775	SRX392700	GSM1290040: C. elegans L3 larvae (sample A); Caenorhabditis elegans; RNA-Seq	Caenorhabditis elegans	Illumina Genome Analyzer IIx	GEO	SRP034522	Conservation of mRNA and protein expression during development of C. elegans	SRS515690		1395.67	1	28404368	2158731968		RNA-Seq	TRANSCRIPTOMIC	cDNA
SRR1050776	SRX392701	GSM1290041: C. elegans L4 larvae (sample A); Caenorhabditis elegans; RNA-Seq	Caenorhabditis elegans	Illumina Genome Analyzer IIx	GEO	SRP034522	Conservation of mRNA and protein expression during development of C. elegans	SRS515691		1615.99	1	32439676	2465415376		RNA-Seq	TRANSCRIPTOMIC	cDNA
SRR1050777	SRX392702	GSM1290042: C. elegans late L4 larvae (sample A); Caenorhabditis elegans; RNA-Seq	Caenorhabditis elegans	Illumina Genome Analyzer IIx	GEO	SRP034522	Conservation of mRNA and protein expression during development of C. elegans	SRS515692		1615.15	1	32096248	2439314848		RNA-Seq	TRANSCRIPTOMIC	cDNA
SRR1050778	SRX392703	GSM1290043: C. elegans young adults (sample A); Caenorhabditis elegans; RNA-Seq	Caenorhabditis elegans	Illumina Genome Analyzer IIx	GEO	SRP034522	Conservation of mRNA and protein expression during development of C. elegans	SRS515693		1510.33	1	13760189	2091548728		RNA-Seq	TRANSCRIPTOMIC	cDNA
SRR1050779	SRX392704	GSM1290044: C. elegans mixed stages reference (sample A, replicate 1); Caenorhabditis elegans; RNA-Seq	Caenorhabditis elegans	Illumina Genome Analyzer IIx	GEO	SRP034522	Conservation of mRNA and protein expression during development of C. elegans	SRS515694		1255.36	1	26026042	1977979192		RNA-Seq	TRANSCRIPTOMIC	cDNA
SRR1050780	SRX392705	GSM1290045: C. elegans mixed stages reference (sample A, replicate 2); Caenorhabditis elegans; RNA-Seq	Caenorhabditis elegans	Illumina Genome Analyzer IIx	GEO	SRP034522	Conservation of mRNA and protein expression during development of C. elegans	SRS515695		1699.38	1	15312869	2327556088		RNA-Seq	TRANSCRIPTOMIC	cDNA
SRR1056307 SRR1056308	SRX397084	GSM1295736: C.elegans(N2) male rep1 RNAseq; Caenorhabditis elegans; RNA-Seq	Caenorhabditis elegans	Illumina HiSeq 2000	GEO	SRP034667	Male and Female DNA and RNA sequencing in several nematode species	SRS518044	13916323	709732473		RNA-Seq	TRANSCRIPTOMIC	cDNA
SRR1056309 SRR1056310	SRX397085	GSM1295737: C.elegans(N2) male rep2 RNAseq; Caenorhabditis elegans; RNA-Seq	Caenorhabditis elegans	Illumina HiSeq 2000	GEO	SRP034667	Male and Female DNA and RNA sequencing in several nematode species	SRS518045	18074178	921783078		RNA-Seq	TRANSCRIPTOMIC	cDNA
SRR1056311 SRR1056312 SRR1056313	SRX397086	GSM1295738: C.elegans(N2) male rep3 RNAseq; Caenorhabditis elegans; RNA-Seq	Caenorhabditis elegans	Illumina HiSeq 2000	GEO	SRP034667	Male and Female DNA and RNA sequencing in several nematode species	SRS518046	25736967	1312585317		RNA-Seq	TRANSCRIPTOMIC	cDNA
SRR1056314	SRX397087	GSM1295739: C.elegans(N2) male rep4 RNAseq; Caenorhabditis elegans; RNA-Seq	Caenorhabditis elegans	Illumina HiSeq 2000	GEO	SRP034667	Male and Female DNA and RNA sequencing in several nematode species	SRS518047	29788044	1519190244		RNA-Seq	TRANSCRIPTOMIC	cDNA
SRR1056315 SRR1056316	SRX397088	GSM1295740: C.elegans(N2) female rep1 RNAseq; Caenorhabditis elegans; RNA-Seq	Caenorhabditis elegans	Illumina HiSeq 2000	GEO	SRP034667	Male and Female DNA and RNA sequencing in several nematode species	SRS518048	22278607	1136208957		RNA-Seq	TRANSCRIPTOMIC	cDNA
SRR1056317 SRR1056318	SRX397089	GSM1295741: C.elegans(N2) female rep2 RNAseq; Caenorhabditis elegans; RNA-Seq	Caenorhabditis elegans	Illumina HiSeq 2000	GEO	SRP034667	Male and Female DNA and RNA sequencing in several nematode species	SRS518049	22614287	1153328637		RNA-Seq	TRANSCRIPTOMIC	cDNA
SRR1056319 SRR1056320	SRX397090	GSM1295742: C.elegans(N2) female rep3 RNAseq; Caenorhabditis elegans; RNA-Seq	Caenorhabditis elegans	Illumina HiSeq 2000	GEO	SRP034667	Male and Female DNA and RNA sequencing in several nematode species	SRS518050	21476358	1095294258		RNA-Seq	TRANSCRIPTOMIC	cDNA
SRR1056321	SRX397091	GSM1295743: C.elegans(N2) female rep4 RNAseq; Caenorhabditis elegans; RNA-Seq	Caenorhabditis elegans	Illumina HiSeq 2000	GEO	SRP034667	Male and Female DNA and RNA sequencing in several nematode species	SRS518051	13708679	699142629		RNA-Seq	TRANSCRIPTOMIC	cDNA
SRR1107312	SRX426002	GSM1306061: N2_untreated_rep1; Caenorhabditis elegans; RNA-Seq	Caenorhabditis elegans	Illumina Genome Analyzer IIx	GEO	SRP035359	Competence for reprogramming sex	SRS529572	40440338	3033025350		RNA-Seq	TRANSCRIPTOMIC	cDNA
SRR1107313	SRX426003	GSM1306062: N2_untreated_rep2; Caenorhabditis elegans; RNA-Seq	Caenorhabditis elegans	Illumina Genome Analyzer IIx	GEO	SRP035359	Competence for reprogramming sex	SRS529573	44170928	2296888256		RNA-Seq	TRANSCRIPTOMIC	cDNA
SRR1107314 SRR1107315	SRX426004	GSM1306063: N2_vehicle_1hr_rep1; Caenorhabditis elegans; RNA-Seq	Caenorhabditis elegans	Illumina Genome Analyzer IIx	GEO	SRP035359	Competence for reprogramming sex	SRS529574	30297464	2272309800		RNA-Seq	TRANSCRIPTOMIC	cDNA
SRR1107316 SRR1107317	SRX426005	GSM1306064: N2_vehicle_1hr_rep2; Caenorhabditis elegans; RNA-Seq	Caenorhabditis elegans	Illumina Genome Analyzer IIx	GEO	SRP035359	Competence for reprogramming sex	SRS529575	46294354	3472076550		RNA-Seq	TRANSCRIPTOMIC	cDNA
SRR1107318 SRR1107319	SRX426006	GSM1306065: N2_drug_1hr_rep1; Caenorhabditis elegans; RNA-Seq	Caenorhabditis elegans	Illumina Genome Analyzer IIx	GEO	SRP035359	Competence for reprogramming sex	SRS529576	31223374	2341753050		RNA-Seq	TRANSCRIPTOMIC	cDNA
SRR1107320 SRR1107321	SRX426007	GSM1306066: N2_drug_1hr_rep2; Caenorhabditis elegans; RNA-Seq	Caenorhabditis elegans	Illumina Genome Analyzer IIx	GEO	SRP035359	Competence for reprogramming sex	SRS529577	30517483	2288811225		RNA-Seq	TRANSCRIPTOMIC	cDNA
SRR1107322 SRR1107323	SRX426008	GSM1306067: N2_vehicle_2hr_rep1; Caenorhabditis elegans; RNA-Seq	Caenorhabditis elegans	Illumina Genome Analyzer IIx	GEO	SRP035359	Competence for reprogramming sex	SRS529578	40079709	3005978175		RNA-Seq	TRANSCRIPTOMIC	cDNA
SRR1107324 SRR1107325	SRX426009	GSM1306068: N2_vehicle_2hr_rep2; Caenorhabditis elegans; RNA-Seq	Caenorhabditis elegans	Illumina Genome Analyzer IIx	GEO	SRP035359	Competence for reprogramming sex	SRS529579	36693087	2751981525		RNA-Seq	TRANSCRIPTOMIC	cDNA
SRR1107326 SRR1107327	SRX426010	GSM1306069: N2_drug_2hr_rep1; Caenorhabditis elegans; RNA-Seq	Caenorhabditis elegans	Illumina Genome Analyzer IIx	GEO	SRP035359	Competence for reprogramming sex	SRS529580	35628448	2672133600		RNA-Seq	TRANSCRIPTOMIC	cDNA
SRR1107328 SRR1107329	SRX426011	GSM1306070: N2_drug_2hr_rep2; Caenorhabditis elegans; RNA-Seq	Caenorhabditis elegans	Illumina Genome Analyzer IIx	GEO	SRP035359	Competence for reprogramming sex	SRS529581	44695397	3352154775		RNA-Seq	TRANSCRIPTOMIC	cDNA
SRR1107330 SRR1107331	SRX426012	GSM1306071: N2_vehicle_6hr_rep1; Caenorhabditis elegans; RNA-Seq	Caenorhabditis elegans	Illumina Genome Analyzer IIx	GEO	SRP035359	Competence for reprogramming sex	SRS529582	36604491	2745336825		RNA-Seq	TRANSCRIPTOMIC	cDNA
SRR1107332 SRR1107333	SRX426013	GSM1306072: N2_vehicle_6hr_rep2; Caenorhabditis elegans; RNA-Seq	Caenorhabditis elegans	Illumina Genome Analyzer IIx	GEO	SRP035359	Competence for reprogramming sex	SRS529583	40314225	3023566875		RNA-Seq	TRANSCRIPTOMIC	cDNA
SRR1107334 SRR1107335	SRX426014	GSM1306073: N2_drug_6hr_rep1; Caenorhabditis elegans; RNA-Seq	Caenorhabditis elegans	Illumina Genome Analyzer IIx	GEO	SRP035359	Competence for reprogramming sex	SRS529584	44526426	3339481950		RNA-Seq	TRANSCRIPTOMIC	cDNA
SRR1107336 SRR1107337	SRX426015	GSM1306074: N2_drug_6hr_rep2; Caenorhabditis elegans; RNA-Seq	Caenorhabditis elegans	Illumina Genome Analyzer IIx	GEO	SRP035359	Competence for reprogramming sex	SRS529585	41966645	3147498375		RNA-Seq	TRANSCRIPTOMIC	cDNA
SRR1107338 SRR1107339	SRX426016	GSM1306075: N2_vehicle_18hr_rep1; Caenorhabditis elegans; RNA-Seq	Caenorhabditis elegans	Illumina Genome Analyzer IIx	GEO	SRP035359	Competence for reprogramming sex	SRS529586	25460512	1909538400		RNA-Seq	TRANSCRIPTOMIC	cDNA
SRR1107340 SRR1107341	SRX426017	GSM1306076: N2_vehicle_18hr_rep2; Caenorhabditis elegans; RNA-Seq	Caenorhabditis elegans	Illumina Genome Analyzer IIx	GEO	SRP035359	Competence for reprogramming sex	SRS529587	38597071	2894780325		RNA-Seq	TRANSCRIPTOMIC	cDNA
SRR1107342 SRR1107343	SRX426018	GSM1306077: N2_drug_18hr_rep1; Caenorhabditis elegans; RNA-Seq	Caenorhabditis elegans	Illumina Genome Analyzer IIx	GEO	SRP035359	Competence for reprogramming sex	SRS529588	57285880	4296441000		RNA-Seq	TRANSCRIPTOMIC	cDNA
SRR1107344 SRR1107345	SRX426019	GSM1306078: N2_drug_18hr_rep2; Caenorhabditis elegans; RNA-Seq	Caenorhabditis elegans	Illumina Genome Analyzer IIx	GEO	SRP035359	Competence for reprogramming sex	SRS529589	37158121	2786859075		RNA-Seq	TRANSCRIPTOMIC	cDNA
SRR1107346 SRR1107347	SRX426020	GSM1306079: PL_untreated_rep1; Caenorhabditis elegans; RNA-Seq	Caenorhabditis elegans	Illumina Genome Analyzer IIx	GEO	SRP035359	Competence for reprogramming sex	SRS529590		3699.71	2	81175005	6006950370		RNA-Seq	TRANSCRIPTOMIC	cDNA
SRR1107348 SRR1107349	SRX426021	GSM1306080: PL_untreated_rep2; Caenorhabditis elegans; RNA-Seq	Caenorhabditis elegans	Illumina Genome Analyzer IIx	GEO	SRP035359	Competence for reprogramming sex	SRS529591		1792.75	2	40547536	3000517664		RNA-Seq	TRANSCRIPTOMIC	cDNA
SRR1107350	SRX426022	GSM1306081: PL_vehicle_1hr_rep1; Caenorhabditis elegans; RNA-Seq	Caenorhabditis elegans	Illumina Genome Analyzer IIx	GEO	SRP035359	Competence for reprogramming sex	SRS529592		1844.57	1	39451164	2958837300		RNA-Seq	TRANSCRIPTOMIC	cDNA
SRR1107351	SRX426023	GSM1306082: PL_vehicle_1hr_rep2; Caenorhabditis elegans; RNA-Seq	Caenorhabditis elegans	Illumina Genome Analyzer IIx	GEO	SRP035359	Competence for reprogramming sex	SRS529593		1894.57	1	40647056	3048529200		RNA-Seq	TRANSCRIPTOMIC	cDNA
SRR1107352	SRX426024	GSM1306083: PL_drug_1hr_rep1; Caenorhabditis elegans; RNA-Seq	Caenorhabditis elegans	Illumina Genome Analyzer IIx	GEO	SRP035359	Competence for reprogramming sex	SRS529594		1729.61	1	37755515	2831663625		RNA-Seq	TRANSCRIPTOMIC	cDNA
SRR1107353	SRX426025	GSM1306084: PL_drug_1hr_rep2; Caenorhabditis elegans; RNA-Seq	Caenorhabditis elegans	Illumina Genome Analyzer IIx	GEO	SRP035359	Competence for reprogramming sex	SRS529595		1670.41	1	36828094	2762107050		RNA-Seq	TRANSCRIPTOMIC	cDNA
SRR1107354	SRX426026	GSM1306085: PL_vehicle_2hr_rep1; Caenorhabditis elegans; RNA-Seq	Caenorhabditis elegans	Illumina Genome Analyzer IIx	GEO	SRP035359	Competence for reprogramming sex	SRS529596		1860.74	1	40326572	3024492900		RNA-Seq	TRANSCRIPTOMIC	cDNA
SRR1107355	SRX426027	GSM1306086: PL_vehicle_2hr_rep2; Caenorhabditis elegans; RNA-Seq	Caenorhabditis elegans	Illumina Genome Analyzer IIx	GEO	SRP035359	Competence for reprogramming sex	SRS529597		1945.32	1	39729057	2979679275		RNA-Seq	TRANSCRIPTOMIC	cDNA
SRR1107356	SRX426028	GSM1306087: PL_drug_2hr_rep1; Caenorhabditis elegans; RNA-Seq	Caenorhabditis elegans	Illumina Genome Analyzer IIx	GEO	SRP035359	Competence for reprogramming sex	SRS529598		1825.11	1	39804878	2985365850		RNA-Seq	TRANSCRIPTOMIC	cDNA
SRR1107357	SRX426029	GSM1306088: PL_drug_2hr_rep2; Caenorhabditis elegans; RNA-Seq	Caenorhabditis elegans	Illumina Genome Analyzer IIx	GEO	SRP035359	Competence for reprogramming sex	SRS529599		1780.3	1	39840143	2988010725		RNA-Seq	TRANSCRIPTOMIC	cDNA
SRR1107358	SRX426030	GSM1306089: PL_vehicle_4hr_rep1; Caenorhabditis elegans; RNA-Seq	Caenorhabditis elegans	Illumina Genome Analyzer IIx	GEO	SRP035359	Competence for reprogramming sex	SRS529600		1153.18	1	26431181	2008769756		RNA-Seq	TRANSCRIPTOMIC	cDNA
SRR1107359	SRX426031	GSM1306090: PL_vehicle_4hr_rep2; Caenorhabditis elegans; RNA-Seq	Caenorhabditis elegans	Illumina Genome Analyzer IIx	GEO	SRP035359	Competence for reprogramming sex	SRS529601		791.81	1	18596888	1413363488		RNA-Seq	TRANSCRIPTOMIC	cDNA
SRR1107360	SRX426032	GSM1306091: PL_drug_4hr_rep1; Caenorhabditis elegans; RNA-Seq	Caenorhabditis elegans	Illumina Genome Analyzer IIx	GEO	SRP035359	Competence for reprogramming sex	SRS529602		650.3	1	15035750	1142717000		RNA-Seq	TRANSCRIPTOMIC	cDNA
SRR1107361	SRX426033	GSM1306092: PL_drug_4hr_rep2; Caenorhabditis elegans; RNA-Seq	Caenorhabditis elegans	Illumina Genome Analyzer IIx	GEO	SRP035359	Competence for reprogramming sex	SRS529603		717.12	1	17077084	1297858384		RNA-Seq	TRANSCRIPTOMIC	cDNA
SRR1107362	SRX426034	GSM1306093: PL_vehicle_6hr_rep1; Caenorhabditis elegans; RNA-Seq	Caenorhabditis elegans	Illumina Genome Analyzer IIx	GEO	SRP035359	Competence for reprogramming sex	SRS529604		1136.28	1	25251745	1919132620		RNA-Seq	TRANSCRIPTOMIC	cDNA
SRR1107363	SRX426035	GSM1306094: PL_vehicle_6hr_rep2; Caenorhabditis elegans; RNA-Seq	Caenorhabditis elegans	Illumina Genome Analyzer IIx	GEO	SRP035359	Competence for reprogramming sex	SRS529605		1109.14	1	24764818	1882126168		RNA-Seq	TRANSCRIPTOMIC	cDNA
SRR1107364	SRX426036	GSM1306095: PL_drug_6hr_rep1; Caenorhabditis elegans; RNA-Seq	Caenorhabditis elegans	Illumina Genome Analyzer IIx	GEO	SRP035359	Competence for reprogramming sex	SRS529607		1228.98	1	26643838	2024931688		RNA-Seq	TRANSCRIPTOMIC	cDNA
SRR1107365	SRX426037	GSM1306096: PL_drug_6hr_rep2; Caenorhabditis elegans; RNA-Seq	Caenorhabditis elegans	Illumina Genome Analyzer IIx	GEO	SRP035359	Competence for reprogramming sex	SRS529606		1097.24	1	24440696	1857492896		RNA-Seq	TRANSCRIPTOMIC	cDNA
SRR1107366	SRX426038	GSM1306097: PL_vehicle_18hr_rep1; Caenorhabditis elegans; RNA-Seq	Caenorhabditis elegans	Illumina Genome Analyzer IIx	GEO	SRP035359	Competence for reprogramming sex	SRS529608		1830.08	1	36505648	2737923600		RNA-Seq	TRANSCRIPTOMIC	cDNA
SRR1107367	SRX426039	GSM1306098: PL_vehicle_18hr_rep2; Caenorhabditis elegans; RNA-Seq	Caenorhabditis elegans	Illumina Genome Analyzer IIx	GEO	SRP035359	Competence for reprogramming sex	SRS529609		1367.76	1	26698322	2002374150		RNA-Seq	TRANSCRIPTOMIC	cDNA
SRR1107368	SRX426040	GSM1306099: PL_drug_18hr_rep1; Caenorhabditis elegans; RNA-Seq	Caenorhabditis elegans	Illumina Genome Analyzer IIx	GEO	SRP035359	Competence for reprogramming sex	SRS529610		1213.05	1	28156624	2111746800		RNA-Seq	TRANSCRIPTOMIC	cDNA
SRR1107369	SRX426041	GSM1306100: PL_drug_18hr_rep2; Caenorhabditis elegans; RNA-Seq	Caenorhabditis elegans	Illumina Genome Analyzer IIx	GEO	SRP035359	Competence for reprogramming sex	SRS529611		1859.95	1	37257096	2794282200		RNA-Seq	TRANSCRIPTOMIC	cDNA
SRR1107370	SRX426042	GSM1306101: PL_vehicle_1hr_rep3; Caenorhabditis elegans; RNA-Seq	Caenorhabditis elegans	Illumina Genome Analyzer IIx	GEO	SRP035359	Competence for reprogramming sex	SRS529612		1171.59	1	27500935	2090071060		RNA-Seq	TRANSCRIPTOMIC	cDNA
SRR1107371	SRX426043	GSM1306102: PL_drug_1hr_rep3; Caenorhabditis elegans; RNA-Seq	Caenorhabditis elegans	Illumina Genome Analyzer IIx	GEO	SRP035359	Competence for reprogramming sex	SRS529613		319.64	1	7581199	576171124		RNA-Seq	TRANSCRIPTOMIC	cDNA
SRR1107372	SRX426044	GSM1306103: PF_untreated_rep1; Caenorhabditis elegans; RNA-Seq	Caenorhabditis elegans	Illumina Genome Analyzer IIx	GEO	SRP035359	Competence for reprogramming sex	SRS529614		859.49	1	20005842	1520443992		RNA-Seq	TRANSCRIPTOMIC	cDNA
SRR1107373	SRX426045	GSM1306104: PF_untreated_rep2; Caenorhabditis elegans; RNA-Seq	Caenorhabditis elegans	Illumina Genome Analyzer IIx	GEO	SRP035359	Competence for reprogramming sex	SRS529615		661.42	1	15344719	1166198644		RNA-Seq	TRANSCRIPTOMIC	cDNA
SRR1107374	SRX426046	GSM1306105: PF_vehicle_1hr_rep1; Caenorhabditis elegans; RNA-Seq	Caenorhabditis elegans	Illumina Genome Analyzer IIx	GEO	SRP035359	Competence for reprogramming sex	SRS529616		774.71	1	16275159	1236912084		RNA-Seq	TRANSCRIPTOMIC	cDNA
SRR1107375	SRX426047	GSM1306106: PF_drug_1hr_rep1; Caenorhabditis elegans; RNA-Seq	Caenorhabditis elegans	Illumina Genome Analyzer IIx	GEO	SRP035359	Competence for reprogramming sex	SRS529617		700.86	1	14744862	1120609512		RNA-Seq	TRANSCRIPTOMIC	cDNA
SRR1107376 SRR1107377	SRX426048	GSM1306107: PF_vehicle_2hr_rep1; Caenorhabditis elegans; RNA-Seq	Caenorhabditis elegans	Illumina Genome Analyzer IIx	GEO	SRP035359	Competence for reprogramming sex	SRS529618		976.33	2	22771047	1730599572		RNA-Seq	TRANSCRIPTOMIC	cDNA
SRR1107378 SRR1107379 SRR1107380 SRR1107381 SRR1107382	SRX426049	GSM1306108: PF_drug_2hr_rep1; Caenorhabditis elegans; RNA-Seq	Caenorhabditis elegans	Illumina Genome Analyzer IIx	GEO	SRP035359	Competence for reprogramming sex	SRS529619		908.77	5	22373030	1700350280		RNA-Seq	TRANSCRIPTOMIC	cDNA
SRR1107383	SRX426050	GSM1306109: PF_vehicle_4hr_rep1; Caenorhabditis elegans; RNA-Seq	Caenorhabditis elegans	Illumina Genome Analyzer IIx	GEO	SRP035359	Competence for reprogramming sex	SRS529621		586.75	1	13724101	1043031676		RNA-Seq	TRANSCRIPTOMIC	cDNA
SRR1107384	SRX426051	GSM1306110: PF_drug_4hr_rep1; Caenorhabditis elegans; RNA-Seq	Caenorhabditis elegans	Illumina Genome Analyzer IIx	GEO	SRP035359	Competence for reprogramming sex	SRS529620		788.79	1	18544779	1409403204		RNA-Seq	TRANSCRIPTOMIC	cDNA
SRR1107385 SRR1107386 SRR1107387	SRX426052	GSM1306111: PF_vehicle_6hr_rep1; Caenorhabditis elegans; RNA-Seq	Caenorhabditis elegans	Illumina Genome Analyzer IIx	GEO	SRP035359	Competence for reprogramming sex	SRS529622		1667.94	3	41135157	3126271932		RNA-Seq	TRANSCRIPTOMIC	cDNA
SRR1107388	SRX426053	GSM1306112: PF_drug_6hr_rep1; Caenorhabditis elegans; RNA-Seq	Caenorhabditis elegans	Illumina Genome Analyzer IIx	GEO	SRP035359	Competence for reprogramming sex	SRS529623		715.18	1	17898892	1360315792		RNA-Seq	TRANSCRIPTOMIC	cDNA
SRR1121967	SRX435689	GSM1309176: N2-1; Caenorhabditis elegans; RNA-Seq	Caenorhabditis elegans	Illumina HiSeq 2000	GEO	SRP035479	Expression profile by RNA-seq of wild type or Caenorhabditis elegans mutant for the Werner syndrome gene ortholog treated with or without vitamin C	SRS535526	17766056	1737360700		RNA-Seq	TRANSCRIPTOMIC	cDNA
SRR1121968	SRX435690	GSM1309177: N2-2; Caenorhabditis elegans; RNA-Seq	Caenorhabditis elegans	Illumina HiSeq 2000	GEO	SRP035479	Expression profile by RNA-seq of wild type or Caenorhabditis elegans mutant for the Werner syndrome gene ortholog treated with or without vitamin C	SRS535525	18149260	1776704900		RNA-Seq	TRANSCRIPTOMIC	cDNA
SRR1121969	SRX435691	GSM1309178: N2-3; Caenorhabditis elegans; RNA-Seq	Caenorhabditis elegans	Illumina HiSeq 2000	GEO	SRP035479	Expression profile by RNA-seq of wild type or Caenorhabditis elegans mutant for the Werner syndrome gene ortholog treated with or without vitamin C	SRS535527	22713496	2224510500		RNA-Seq	TRANSCRIPTOMIC	cDNA
SRR1121970	SRX435692	GSM1309179: N2-1-vitC; Caenorhabditis elegans; RNA-Seq	Caenorhabditis elegans	Illumina HiSeq 2000	GEO	SRP035479	Expression profile by RNA-seq of wild type or Caenorhabditis elegans mutant for the Werner syndrome gene ortholog treated with or without vitamin C	SRS535528	19443920	1908323100		RNA-Seq	TRANSCRIPTOMIC	cDNA
SRR1121971	SRX435693	GSM1309180: N2-2-vitC; Caenorhabditis elegans; RNA-Seq	Caenorhabditis elegans	Illumina HiSeq 2000	GEO	SRP035479	Expression profile by RNA-seq of wild type or Caenorhabditis elegans mutant for the Werner syndrome gene ortholog treated with or without vitamin C	SRS535530	18693806	1833634900		RNA-Seq	TRANSCRIPTOMIC	cDNA
SRR1121972	SRX435694	GSM1309181: N2-3-vitC; Caenorhabditis elegans; RNA-Seq	Caenorhabditis elegans	Illumina HiSeq 2000	GEO	SRP035479	Expression profile by RNA-seq of wild type or Caenorhabditis elegans mutant for the Werner syndrome gene ortholog treated with or without vitamin C	SRS535529	24700682	2421574300		RNA-Seq	TRANSCRIPTOMIC	cDNA
SRR1121973	SRX435695	GSM1309182: Wrn-1; Caenorhabditis elegans; RNA-Seq	Caenorhabditis elegans	Illumina HiSeq 2000	GEO	SRP035479	Expression profile by RNA-seq of wild type or Caenorhabditis elegans mutant for the Werner syndrome gene ortholog treated with or without vitamin C	SRS535531		1603.51	1	37746553	3700411700		RNA-Seq	TRANSCRIPTOMIC	cDNA
SRR1121974	SRX435696	GSM1309183: Wrn-2; Caenorhabditis elegans; RNA-Seq	Caenorhabditis elegans	Illumina HiSeq 2000	GEO	SRP035479	Expression profile by RNA-seq of wild type or Caenorhabditis elegans mutant for the Werner syndrome gene ortholog treated with or without vitamin C	SRS535532		1122.86	1	26188284	2567174050		RNA-Seq	TRANSCRIPTOMIC	cDNA
SRR1121975	SRX435697	GSM1309184: Wrn-3; Caenorhabditis elegans; RNA-Seq	Caenorhabditis elegans	Illumina HiSeq 2000	GEO	SRP035479	Expression profile by RNA-seq of wild type or Caenorhabditis elegans mutant for the Werner syndrome gene ortholog treated with or without vitamin C	SRS535533		900.7	1	21534567	2113173300		RNA-Seq	TRANSCRIPTOMIC	cDNA
SRR1121976	SRX435698	GSM1309185: Wrn-1-vitC; Caenorhabditis elegans; RNA-Seq	Caenorhabditis elegans	Illumina HiSeq 2000	GEO	SRP035479	Expression profile by RNA-seq of wild type or Caenorhabditis elegans mutant for the Werner syndrome gene ortholog treated with or without vitamin C	SRS535534		1256.4	1	29379232	2879464450		RNA-Seq	TRANSCRIPTOMIC	cDNA
SRR1121977	SRX435699	GSM1309186: Wrn-2-vitC; Caenorhabditis elegans; RNA-Seq	Caenorhabditis elegans	Illumina HiSeq 2000	GEO	SRP035479	Expression profile by RNA-seq of wild type or Caenorhabditis elegans mutant for the Werner syndrome gene ortholog treated with or without vitamin C	SRS535535		629.34	1	14930772	1463631850		RNA-Seq	TRANSCRIPTOMIC	cDNA
SRR1121978	SRX435700	GSM1309187: Wrn-3-vitC; Caenorhabditis elegans; RNA-Seq	Caenorhabditis elegans	Illumina HiSeq 2000	GEO	SRP035479	Expression profile by RNA-seq of wild type or Caenorhabditis elegans mutant for the Werner syndrome gene ortholog treated with or without vitamin C	SRS535537		1036.05	1	24871768	2439619400		RNA-Seq	TRANSCRIPTOMIC	cDNA
SRR1125001	SRX437618		Caenorhabditis elegans	Illumina Genome Analyzer II	WUGSC	SRP023261	Caenorhabditis elegansTranscriptome or Gene expression	SRS537082		3978.08	1	32809423	6561884600	2879647002	RNA-Seq	TRANSCRIPTOMIC	unspecified
SRR1125007	SRX437635	RNA-seq of C. elegans L4 larvae, treated with 4 hr albendazole	Caenorhabditis elegans	Illumina HiSeq 2000	Cal. Inst. of Tech., Division of Biology	SRP035507	Caenorhabditis elegans transcriptome, in response to albendazole	SRS537099		1375.84	1	43302452	2165122600	Alb_ele.4hr.L4	RNA-Seq	TRANSCRIPTOMIC	PolyA
SRR1125008	SRX437640	RNA-seq of C. elegans L4 larvae, treated with 4 hr buffer rather than albendazole	Caenorhabditis elegans	Illumina HiSeq 2000	Cal. Inst. of Tech., Division of Biology	SRP035507	Caenorhabditis elegans transcriptome, in response to albendazole	SRS537104		1189.93	1	37463891	1873194550	noAlb_ele.cont.L4	RNA-Seq	TRANSCRIPTOMIC	PolyA
SRR1146673	SRX451803	GSM1318160: OMA1_RIPSeq; Caenorhabditis elegans; RNA-Seq	Caenorhabditis elegans	Illumina HiSeq 2000	GEO	SRP036048	mRNAs that co-purify with OMA-1 in the C. elegans germline (sequencing)	SRS548527		6507.39	1	98322681	9832268100		RNA-Seq	TRANSCRIPTOMIC	cDNA
SRR1166884	SRX469110	GSM1325219: Nr01 -GlcN; Caenorhabditis elegans; RNA-Seq	Caenorhabditis elegans	Illumina HiSeq 2000	GEO	SRP037555	RNA-seq of C.elegans and M.musculus in the presence and absence of D-Glucosamine (GlcN)	SRS556430		2385.42	1	73111273	3655563650		RNA-Seq	TRANSCRIPTOMIC	cDNA
SRR1166885	SRX469111	GSM1325220: Nr02 -GlcN; Caenorhabditis elegans; RNA-Seq	Caenorhabditis elegans	Illumina HiSeq 2000	GEO	SRP037555	RNA-seq of C.elegans and M.musculus in the presence and absence of D-Glucosamine (GlcN)	SRS556431		1181.63	1	36023794	1801189700		RNA-Seq	TRANSCRIPTOMIC	cDNA
SRR1166886	SRX469112	GSM1325221: Nr03 -GlcN; Caenorhabditis elegans; RNA-Seq	Caenorhabditis elegans	Illumina HiSeq 2000	GEO	SRP037555	RNA-seq of C.elegans and M.musculus in the presence and absence of D-Glucosamine (GlcN)	SRS556432		1469.54	1	44931760	2246588000		RNA-Seq	TRANSCRIPTOMIC	cDNA
SRR1166887	SRX469113	GSM1325222: Nr04 -GlcN; Caenorhabditis elegans; RNA-Seq	Caenorhabditis elegans	Illumina HiSeq 2000	GEO	SRP037555	RNA-seq of C.elegans and M.musculus in the presence and absence of D-Glucosamine (GlcN)	SRS556433		1218.47	1	37233328	1861666400		RNA-Seq	TRANSCRIPTOMIC	cDNA
SRR1166888	SRX469114	GSM1325223: Nr05 -GlcN; Caenorhabditis elegans; RNA-Seq	Caenorhabditis elegans	Illumina HiSeq 2000	GEO	SRP037555	RNA-seq of C.elegans and M.musculus in the presence and absence of D-Glucosamine (GlcN)	SRS556434		1581.86	1	48583171	2429158550		RNA-Seq	TRANSCRIPTOMIC	cDNA
SRR1166889	SRX469115	GSM1325224: Nr06 -GlcN; Caenorhabditis elegans; RNA-Seq	Caenorhabditis elegans	Illumina HiSeq 2000	GEO	SRP037555	RNA-seq of C.elegans and M.musculus in the presence and absence of D-Glucosamine (GlcN)	SRS556435		1363.01	1	41731949	2086597450		RNA-Seq	TRANSCRIPTOMIC	cDNA
SRR1166890	SRX469116	GSM1325225: Nr07 +GlcN; Caenorhabditis elegans; RNA-Seq	Caenorhabditis elegans	Illumina HiSeq 2000	GEO	SRP037555	RNA-seq of C.elegans and M.musculus in the presence and absence of D-Glucosamine (GlcN)	SRS556436		1435.07	1	43997533	2199876650		RNA-Seq	TRANSCRIPTOMIC	cDNA
SRR1166891	SRX469117	GSM1325226: Nr08 +GlcN; Caenorhabditis elegans; RNA-Seq	Caenorhabditis elegans	Illumina HiSeq 2000	GEO	SRP037555	RNA-seq of C.elegans and M.musculus in the presence and absence of D-Glucosamine (GlcN)	SRS556437		1747.65	1	53819002	2690950100		RNA-Seq	TRANSCRIPTOMIC	cDNA
SRR1166892	SRX469118	GSM1325227: Nr09 +GlcN; Caenorhabditis elegans; RNA-Seq	Caenorhabditis elegans	Illumina HiSeq 2000	GEO	SRP037555	RNA-seq of C.elegans and M.musculus in the presence and absence of D-Glucosamine (GlcN)	SRS556438		1551.13	1	48254357	2412717850		RNA-Seq	TRANSCRIPTOMIC	cDNA
SRR1166893	SRX469119	GSM1325228: Nr10 +GlcN; Caenorhabditis elegans; RNA-Seq	Caenorhabditis elegans	Illumina HiSeq 2000	GEO	SRP037555	RNA-seq of C.elegans and M.musculus in the presence and absence of D-Glucosamine (GlcN)	SRS556439		1318.19	1	40693387	2034669350		RNA-Seq	TRANSCRIPTOMIC	cDNA
SRR1166894	SRX469120	GSM1325229: Nr11 +GlcN; Caenorhabditis elegans; RNA-Seq	Caenorhabditis elegans	Illumina HiSeq 2000	GEO	SRP037555	RNA-seq of C.elegans and M.musculus in the presence and absence of D-Glucosamine (GlcN)	SRS556440		1343.63	1	41853204	2092660200		RNA-Seq	TRANSCRIPTOMIC	cDNA
SRR1166895	SRX469121	GSM1325230: Nr12 +GlcN; Caenorhabditis elegans; RNA-Seq	Caenorhabditis elegans	Illumina HiSeq 2000	GEO	SRP037555	RNA-seq of C.elegans and M.musculus in the presence and absence of D-Glucosamine (GlcN)	SRS556441		1602.8	1	49964818	2498240900		RNA-Seq	TRANSCRIPTOMIC	cDNA
SRR1174009	SRX474206	GSM1331889: WT rep1; Caenorhabditis elegans; RNA-Seq	Caenorhabditis elegans	Illumina HiSeq 2500	GEO	SRP038704	RNA-seq analysis of WT and blmp-1(tm548) mutant L3 larvae	SRS560196	43430301	4082448294		RNA-Seq	TRANSCRIPTOMIC	cDNA
SRR1174010	SRX474207	GSM1331890: WT rep2; Caenorhabditis elegans; RNA-Seq	Caenorhabditis elegans	Illumina HiSeq 2500	GEO	SRP038704	RNA-seq analysis of WT and blmp-1(tm548) mutant L3 larvae	SRS560195	42479898	3993110412		RNA-Seq	TRANSCRIPTOMIC	cDNA
SRR1174011	SRX474208	GSM1331891: WT rep3; Caenorhabditis elegans; RNA-Seq	Caenorhabditis elegans	Illumina HiSeq 2500	GEO	SRP038704	RNA-seq analysis of WT and blmp-1(tm548) mutant L3 larvae	SRS560197	47248371	4441346874		RNA-Seq	TRANSCRIPTOMIC	cDNA
SRR1174012	SRX474209	GSM1331892: blmp-1(tm548) rep1; Caenorhabditis elegans; RNA-Seq	Caenorhabditis elegans	Illumina HiSeq 2500	GEO	SRP038704	RNA-seq analysis of WT and blmp-1(tm548) mutant L3 larvae	SRS560198		2692.85	1	42609914	4005331916		RNA-Seq	TRANSCRIPTOMIC	cDNA
SRR1174013	SRX474210	GSM1331893: blmp-1(tm548) rep2; Caenorhabditis elegans; RNA-Seq	Caenorhabditis elegans	Illumina HiSeq 2500	GEO	SRP038704	RNA-seq analysis of WT and blmp-1(tm548) mutant L3 larvae	SRS560199		2855.49	1	44000000	4136000000		RNA-Seq	TRANSCRIPTOMIC	cDNA
SRR1174014	SRX474211	GSM1331894: blmp-1(tm548) rep3; Caenorhabditis elegans; RNA-Seq	Caenorhabditis elegans	Illumina HiSeq 2500	GEO	SRP038704	RNA-seq analysis of WT and blmp-1(tm548) mutant L3 larvae	SRS560200		2634.78	1	41067808	3860373952		RNA-Seq	TRANSCRIPTOMIC	cDNA
SRR1175759	SRX475502	RNA-seq of C. elegans wild-type ALA neurons, from mid-L4 larvae: pool of 4 ALA neurons	Caenorhabditis elegans	Illumina HiSeq 2000	Cal. Inst. of Tech., Division of Biology	SRP038903	Caenorhabditis elegans ALA neuron transcriptome (wild-type, mid-L4 larval stage)	SRS561255	33684420	1684221000	ALA_wt_midL4_pool1_13104_TB513-1	RNA-Seq	TRANSCRIPTOMIC	RT-PCR
SRR1175761	SRX475503	RNA-seq of C. elegans wild-type ALA neurons, from mid-L4 larvae: pool of 5 ALA neurons	Caenorhabditis elegans	Illumina HiSeq 2000	Cal. Inst. of Tech., Division of Biology	SRP038903	Caenorhabditis elegans ALA neuron transcriptome (wild-type, mid-L4 larval stage)	SRS561256	44099793	2204989650	ALA_wt_midL4_pool2_13105_TB513-2	RNA-Seq	TRANSCRIPTOMIC	RT-PCR
SRR1176664	SRX475894	GSM1334315: cel_mock_2.5d; Caenorhabditis elegans; RNA-Seq	Caenorhabditis elegans	Illumina HiSeq 2000	GEO	SRP038923	Transcriptome wide identification of Dicer binding in human and C. elegans reveals a variety of substrates (CEL RNA-Seq)	SRS561638		2034.19	1	16340848	3300851296		RNA-Seq	TRANSCRIPTOMIC	cDNA
SRR1176665	SRX475895	GSM1334316: cel_dcr1_2.5d; Caenorhabditis elegans; RNA-Seq	Caenorhabditis elegans	Illumina HiSeq 2000	GEO	SRP038923	Transcriptome wide identification of Dicer binding in human and C. elegans reveals a variety of substrates (CEL RNA-Seq)	SRS561639		1296.85	1	10286620	2077897240		RNA-Seq	TRANSCRIPTOMIC	cDNA
SRR1176666	SRX475896	GSM1334317: cel_drsh1_2.5d; Caenorhabditis elegans; RNA-Seq	Caenorhabditis elegans	Illumina HiSeq 2000	GEO	SRP038923	Transcriptome wide identification of Dicer binding in human and C. elegans reveals a variety of substrates (CEL RNA-Seq)	SRS561640		2157.67	1	17322035	3499051070		RNA-Seq	TRANSCRIPTOMIC	cDNA
SRR1198063	SRX494547	GSM1349884: N2 rep1; Caenorhabditis elegans; RNA-Seq	Caenorhabditis elegans	Illumina HiSeq 2500	GEO	SRP040269	mRNA profile in DR-related mutants	SRS576945	44474499	4491924399		RNA-Seq	TRANSCRIPTOMIC	cDNA
SRR1198064	SRX494548	GSM1349885: N2 rep2; Caenorhabditis elegans; RNA-Seq	Caenorhabditis elegans	Illumina HiSeq 2500	GEO	SRP040269	mRNA profile in DR-related mutants	SRS576946	42900253	4332925553		RNA-Seq	TRANSCRIPTOMIC	cDNA
SRR1198065	SRX494549	GSM1349886: N2 rep3; Caenorhabditis elegans; RNA-Seq	Caenorhabditis elegans	Illumina HiSeq 2500	GEO	SRP040269	mRNA profile in DR-related mutants	SRS576948	42707081	4313415181		RNA-Seq	TRANSCRIPTOMIC	cDNA
SRR1198066	SRX494550	GSM1349887: nhr-62 rep1; Caenorhabditis elegans; RNA-Seq	Caenorhabditis elegans	Illumina HiSeq 2500	GEO	SRP040269	mRNA profile in DR-related mutants	SRS576947		4944.63	1	68329471	6901276571		RNA-Seq	TRANSCRIPTOMIC	cDNA
SRR1198067	SRX494551	GSM1349888: nhr-62 rep2; Caenorhabditis elegans; RNA-Seq	Caenorhabditis elegans	Illumina HiSeq 2500	GEO	SRP040269	mRNA profile in DR-related mutants	SRS576949		3186.56	1	45570406	4602611006		RNA-Seq	TRANSCRIPTOMIC	cDNA
SRR1198068	SRX494552	GSM1349889: nhr-62 rep3; Caenorhabditis elegans; RNA-Seq	Caenorhabditis elegans	Illumina HiSeq 2500	GEO	SRP040269	mRNA profile in DR-related mutants	SRS576950		3975.62	1	56622411	5718863511		RNA-Seq	TRANSCRIPTOMIC	cDNA
SRR1198069	SRX494553	GSM1349890: eat-2 rep1; Caenorhabditis elegans; RNA-Seq	Caenorhabditis elegans	Illumina HiSeq 2500	GEO	SRP040269	mRNA profile in DR-related mutants	SRS576951		2682.62	1	38075546	3845630146		RNA-Seq	TRANSCRIPTOMIC	cDNA
SRR1198070	SRX494554	GSM1349891: eat-2 rep2; Caenorhabditis elegans; RNA-Seq	Caenorhabditis elegans	Illumina HiSeq 2500	GEO	SRP040269	mRNA profile in DR-related mutants	SRS576952		2708.57	1	38826426	3921469026		RNA-Seq	TRANSCRIPTOMIC	cDNA
SRR1198071	SRX494555	GSM1349892: eat-2 rep3; Caenorhabditis elegans; RNA-Seq	Caenorhabditis elegans	Illumina HiSeq 2500	GEO	SRP040269	mRNA profile in DR-related mutants	SRS576953		2223.62	1	31547076	3186254676		RNA-Seq	TRANSCRIPTOMIC	cDNA
SRR1198072	SRX494556	GSM1349893: nhr-62;eat-2 rep1; Caenorhabditis elegans; RNA-Seq	Caenorhabditis elegans	Illumina HiSeq 2500	GEO	SRP040269	mRNA profile in DR-related mutants	SRS576954		1903.84	1	27083412	2735424612		RNA-Seq	TRANSCRIPTOMIC	cDNA
SRR1198073	SRX494557	GSM1349894: nhr-62;eat-2 rep2; Caenorhabditis elegans; RNA-Seq	Caenorhabditis elegans	Illumina HiSeq 2500	GEO	SRP040269	mRNA profile in DR-related mutants	SRS576955		3182.71	1	45619411	4607560511		RNA-Seq	TRANSCRIPTOMIC	cDNA
SRR1198074	SRX494558	GSM1349895: nhr-62;eat-2 rep3; Caenorhabditis elegans; RNA-Seq	Caenorhabditis elegans	Illumina HiSeq 2500	GEO	SRP040269	mRNA profile in DR-related mutants	SRS576956		2956.75	1	42024255	4244449755		RNA-Seq	TRANSCRIPTOMIC	cDNA
SRR1206053	SRX501864	GSM1358060: prg-1_L1_mRNA; Caenorhabditis elegans; RNA-Seq	Caenorhabditis elegans	Illumina HiSeq 2000	GEO	SRP040623	The expression mRNAs after prg-1 mutation	SRS582909		369.96	1	11794170	577914330		RNA-Seq	TRANSCRIPTOMIC	cDNA
SRR1206054	SRX501865	GSM1358061: prg-1_L2_mRNA; Caenorhabditis elegans; RNA-Seq	Caenorhabditis elegans	Illumina HiSeq 2000	GEO	SRP040623	The expression mRNAs after prg-1 mutation	SRS582910		372.45	1	11842726	580293574		RNA-Seq	TRANSCRIPTOMIC	cDNA
SRR1206055	SRX501866	GSM1358062: prg-1_L3_mRNA; Caenorhabditis elegans; RNA-Seq	Caenorhabditis elegans	Illumina HiSeq 2000	GEO	SRP040623	The expression mRNAs after prg-1 mutation	SRS582911		386.2	1	12222134	598884566		RNA-Seq	TRANSCRIPTOMIC	cDNA
SRR1206056	SRX501867	GSM1358063: prg-1_L4_mRNA; Caenorhabditis elegans; RNA-Seq	Caenorhabditis elegans	Illumina HiSeq 2000	GEO	SRP040623	The expression mRNAs after prg-1 mutation	SRS582912		390.04	1	12397981	607501069		RNA-Seq	TRANSCRIPTOMIC	cDNA
SRR1233915 SRR1237952 SRR1259266 SRR1259307 SRR1261335	SRX514835	WT RNASEQ	Caenorhabditis elegans	Illumina HiSeq 2000	Harvard University	SRP041095	Caenorhabditis elegans Transcriptome or Gene expression	SRS590912	820740972	99537279236		RNA-Seq	TRANSCRIPTOMIC	PolyA
SRR1263137 SRR1263138 SRR1263139 SRR1263140	SRX527951	GSM1375418: q71 gonads Replicate 1; Caenorhabditis elegans; RNA-Seq	Caenorhabditis elegans	Illumina HiSeq 2000	GEO	SRP041461	A new dataset of spermatogenic vs oogenic transcriptomes in the nematode C. elegans	SRS597941		2694.48	4	42643861	4307029961		RNA-Seq	TRANSCRIPTOMIC	cDNA
SRR1263141 SRR1263142 SRR1263143 SRR1263144	SRX527952	GSM1375419: q71 gonads Replicate 2; Caenorhabditis elegans; RNA-Seq	Caenorhabditis elegans	Illumina HiSeq 2000	GEO	SRP041461	A new dataset of spermatogenic vs oogenic transcriptomes in the nematode C. elegans	SRS597942		2089.59	4	32856495	3318505995		RNA-Seq	TRANSCRIPTOMIC	cDNA
SRR1263145 SRR1263146 SRR1263147 SRR1263148	SRX527953	GSM1375420: q71 gonads Replicate 3; Caenorhabditis elegans; RNA-Seq	Caenorhabditis elegans	Illumina HiSeq 2000	GEO	SRP041461	A new dataset of spermatogenic vs oogenic transcriptomes in the nematode C. elegans	SRS597943		2168.54	4	34271918	3461463718		RNA-Seq	TRANSCRIPTOMIC	cDNA
SRR1263149 SRR1263150 SRR1263151 SRR1263152	SRX527954	GSM1375421: q71 gonads Replicate 5; Caenorhabditis elegans; RNA-Seq	Caenorhabditis elegans	Illumina HiSeq 2000	GEO	SRP041461	A new dataset of spermatogenic vs oogenic transcriptomes in the nematode C. elegans	SRS597944		2633.16	4	41600154	4201615554		RNA-Seq	TRANSCRIPTOMIC	cDNA
SRR1263153 SRR1263154 SRR1263155 SRR1263156	SRX527955	GSM1375422: q71 gonads Replicate 6; Caenorhabditis elegans; RNA-Seq	Caenorhabditis elegans	Illumina HiSeq 2000	GEO	SRP041461	A new dataset of spermatogenic vs oogenic transcriptomes in the nematode C. elegans	SRS597945		1764.95	4	27795416	2807337016		RNA-Seq	TRANSCRIPTOMIC	cDNA
SRR1263157 SRR1263158 SRR1263159 SRR1263160	SRX527956	GSM1375423: q71 gonads Replicate 7; Caenorhabditis elegans; RNA-Seq	Caenorhabditis elegans	Illumina HiSeq 2000	GEO	SRP041461	A new dataset of spermatogenic vs oogenic transcriptomes in the nematode C. elegans	SRS597947		2405.76	4	37987191	3836706291		RNA-Seq	TRANSCRIPTOMIC	cDNA
SRR1263161 SRR1263162 SRR1263163 SRR1263164	SRX527957	GSM1375424: q71 gonads Replicate 8; Caenorhabditis elegans; RNA-Seq	Caenorhabditis elegans	Illumina HiSeq 2000	GEO	SRP041461	A new dataset of spermatogenic vs oogenic transcriptomes in the nematode C. elegans	SRS597946		2290.24	4	36072547	3643327247		RNA-Seq	TRANSCRIPTOMIC	cDNA
SRR1263165 SRR1263166 SRR1263167 SRR1263168	SRX527958	GSM1375425: q71 gonads Replicate 9; Caenorhabditis elegans; RNA-Seq	Caenorhabditis elegans	Illumina HiSeq 2000	GEO	SRP041461	A new dataset of spermatogenic vs oogenic transcriptomes in the nematode C. elegans	SRS597948		2895.61	4	45621801	4607801901		RNA-Seq	TRANSCRIPTOMIC	cDNA
SRR1263169 SRR1263170 SRR1263171 SRR1263172	SRX527959	GSM1375426: q96 gonads Replicate 10; Caenorhabditis elegans; RNA-Seq	Caenorhabditis elegans	Illumina HiSeq 2000	GEO	SRP041461	A new dataset of spermatogenic vs oogenic transcriptomes in the nematode C. elegans	SRS597949		2589.23	4	40898643	4130762943		RNA-Seq	TRANSCRIPTOMIC	cDNA
SRR1263173 SRR1263174 SRR1263175 SRR1263176	SRX527960	GSM1375427: q96 gonads Replicate 11; Caenorhabditis elegans; RNA-Seq	Caenorhabditis elegans	Illumina HiSeq 2000	GEO	SRP041461	A new dataset of spermatogenic vs oogenic transcriptomes in the nematode C. elegans	SRS597950		2132.83	4	33601286	3393729886		RNA-Seq	TRANSCRIPTOMIC	cDNA
SRR1263177 SRR1263178 SRR1263179 SRR1263180	SRX527961	GSM1375428: q96 gonads Replicate 13; Caenorhabditis elegans; RNA-Seq	Caenorhabditis elegans	Illumina HiSeq 2000	GEO	SRP041461	A new dataset of spermatogenic vs oogenic transcriptomes in the nematode C. elegans	SRS597951		1902.85	4	30038398	3033878198		RNA-Seq	TRANSCRIPTOMIC	cDNA
SRR1263181 SRR1263182 SRR1263183 SRR1263184	SRX527962	GSM1375429: q96 gonads Replicate 2; Caenorhabditis elegans; RNA-Seq	Caenorhabditis elegans	Illumina HiSeq 2000	GEO	SRP041461	A new dataset of spermatogenic vs oogenic transcriptomes in the nematode C. elegans	SRS597952		2249.42	4	35382386	3573620986		RNA-Seq	TRANSCRIPTOMIC	cDNA
SRR1263185 SRR1263186 SRR1263187 SRR1263188	SRX527963	GSM1375430: q96 gonads Replicate 4; Caenorhabditis elegans; RNA-Seq	Caenorhabditis elegans	Illumina HiSeq 2000	GEO	SRP041461	A new dataset of spermatogenic vs oogenic transcriptomes in the nematode C. elegans	SRS597953		2388.36	4	37629625	3800592125		RNA-Seq	TRANSCRIPTOMIC	cDNA
SRR1263189 SRR1263190 SRR1263191 SRR1263192	SRX527964	GSM1375431: q96 gonads Replicate 5; Caenorhabditis elegans; RNA-Seq	Caenorhabditis elegans	Illumina HiSeq 2000	GEO	SRP041461	A new dataset of spermatogenic vs oogenic transcriptomes in the nematode C. elegans	SRS597954		2402.46	4	37858934	3823752334		RNA-Seq	TRANSCRIPTOMIC	cDNA
SRR1263193 SRR1263194 SRR1263195 SRR1263196	SRX527965	GSM1375432: q96 gonads Replicate 7; Caenorhabditis elegans; RNA-Seq	Caenorhabditis elegans	Illumina HiSeq 2000	GEO	SRP041461	A new dataset of spermatogenic vs oogenic transcriptomes in the nematode C. elegans	SRS597955		2545.19	4	39871562	4027027762		RNA-Seq	TRANSCRIPTOMIC	cDNA
SRR1263197 SRR1263198 SRR1263199 SRR1263200	SRX527966	GSM1375433: q96 gonads Replicate 8; Caenorhabditis elegans; RNA-Seq	Caenorhabditis elegans	Illumina HiSeq 2000	GEO	SRP041461	A new dataset of spermatogenic vs oogenic transcriptomes in the nematode C. elegans	SRS597956		2333.85	4	36569505	3693520005		RNA-Seq	TRANSCRIPTOMIC	cDNA
SRR1272308	SRX533796	GSM1380823: 1-cell embryos (polyA replicate 1); Caenorhabditis elegans; RNA-Seq	Caenorhabditis elegans	Illumina HiSeq 2000	GEO	SRP041708	Paternal RNA contributions in the C. elegans zygote	SRS602524		7981.35	1	70549834	14109966800		RNA-Seq	TRANSCRIPTOMIC	cDNA
SRR1272309	SRX533797	GSM1380824: 1-cell embryos (polyA replicate 2); Caenorhabditis elegans; RNA-Seq	Caenorhabditis elegans	Illumina HiSeq 2000	GEO	SRP041708	Paternal RNA contributions in the C. elegans zygote	SRS602525		7539.94	1	66884309	13376861800		RNA-Seq	TRANSCRIPTOMIC	cDNA
SRR1272310	SRX533798	GSM1380825: 1-cell embryos (polyA replicate 3); Caenorhabditis elegans; RNA-Seq	Caenorhabditis elegans	Illumina HiSeq 2000	GEO	SRP041708	Paternal RNA contributions in the C. elegans zygote	SRS602526		8580.97	1	76650688	15483438976		RNA-Seq	TRANSCRIPTOMIC	cDNA
SRR1272311	SRX533799	GSM1380826: 1-cell embryos (ribominus replicate 1); Caenorhabditis elegans; RNA-Seq	Caenorhabditis elegans	Illumina HiSeq 2000	GEO	SRP041708	Paternal RNA contributions in the C. elegans zygote	SRS602527		9491.05	1	82290914	16458182800		RNA-Seq	TRANSCRIPTOMIC	cDNA
SRR1272312	SRX533800	GSM1380827: 1-cell embryos (ribominus replicate 2); Caenorhabditis elegans; RNA-Seq	Caenorhabditis elegans	Illumina HiSeq 2000	GEO	SRP041708	Paternal RNA contributions in the C. elegans zygote	SRS602528		9389.96	1	81330815	16266163000		RNA-Seq	TRANSCRIPTOMIC	cDNA
SRR1272313	SRX533801	GSM1380828: 1-cell embryos (ribominus replicate 3); Caenorhabditis elegans; RNA-Seq	Caenorhabditis elegans	Illumina HiSeq 2000	GEO	SRP041708	Paternal RNA contributions in the C. elegans zygote	SRS602529		7901.46	1	69744890	14088467780		RNA-Seq	TRANSCRIPTOMIC	cDNA
SRR1272314	SRX533802	GSM1380829: CB4856 whole worm (polyA replicate 1); Caenorhabditis elegans; RNA-Seq	Caenorhabditis elegans	Illumina HiSeq 2000	GEO	SRP041708	Paternal RNA contributions in the C. elegans zygote	SRS602530		2790.04	1	26288552	5257710400		RNA-Seq	TRANSCRIPTOMIC	cDNA
SRR1272315	SRX533803	GSM1380830: CB4856 whole worm (polyA replicate 2); Caenorhabditis elegans; RNA-Seq	Caenorhabditis elegans	Illumina HiSeq 2000	GEO	SRP041708	Paternal RNA contributions in the C. elegans zygote	SRS602531		2782.82	1	26201075	5240215000		RNA-Seq	TRANSCRIPTOMIC	cDNA
SRR1272316	SRX533804	GSM1380831: CB4856 whole worm (polyA replicate 3); Caenorhabditis elegans; RNA-Seq	Caenorhabditis elegans	Illumina HiSeq 2000	GEO	SRP041708	Paternal RNA contributions in the C. elegans zygote	SRS602532		12212.7	1	104072593	21022663786		RNA-Seq	TRANSCRIPTOMIC	cDNA
SRR1272317	SRX533805	GSM1380832: CB4856 sperm (polyA low purity); Caenorhabditis elegans; RNA-Seq	Caenorhabditis elegans	Illumina HiSeq 2000	GEO	SRP041708	Paternal RNA contributions in the C. elegans zygote	SRS602533		1936.72	1	20298431	3085361512		RNA-Seq	TRANSCRIPTOMIC	cDNA
SRR1272318	SRX533806	GSM1380833: CB4856 sperm (polyA high purity, pronase treated); Caenorhabditis elegans; RNA-Seq	Caenorhabditis elegans	Illumina HiSeq 2000	GEO	SRP041708	Paternal RNA contributions in the C. elegans zygote	SRS602534		1998.21	1	20820923	3164780296		RNA-Seq	TRANSCRIPTOMIC	cDNA
SRR1272319	SRX533807	GSM1380834: N2_background whole worm (polyA replicate 1); Caenorhabditis elegans; RNA-Seq	Caenorhabditis elegans	Illumina HiSeq 2000	GEO	SRP041708	Paternal RNA contributions in the C. elegans zygote	SRS602535	25386247	5077249400		RNA-Seq	TRANSCRIPTOMIC	cDNA
SRR1272320	SRX533808	GSM1380835: N2_background whole worm (polyA replicate 2); Caenorhabditis elegans; RNA-Seq	Caenorhabditis elegans	Illumina HiSeq 2000	GEO	SRP041708	Paternal RNA contributions in the C. elegans zygote	SRS602536	24798076	4959615200		RNA-Seq	TRANSCRIPTOMIC	cDNA
SRR1272321	SRX533809	GSM1380836: N2_background whole worm (polyA replicate 3); Caenorhabditis elegans; RNA-Seq	Caenorhabditis elegans	Illumina HiSeq 2000	GEO	SRP041708	Paternal RNA contributions in the C. elegans zygote	SRS602537	88575503	17892251606		RNA-Seq	TRANSCRIPTOMIC	cDNA
SRR1272322	SRX533810	GSM1380837: fog2 sperm (polyA replicate 1); Caenorhabditis elegans; RNA-Seq	Caenorhabditis elegans	Illumina HiSeq 2000	GEO	SRP041708	Paternal RNA contributions in the C. elegans zygote	SRS602538		2063.34	1	21512129	3269843608		RNA-Seq	TRANSCRIPTOMIC	cDNA
SRR1290426	SRX545692	GSM1387889: N2_OP50_rep1; Caenorhabditis elegans; RNA-Seq	Caenorhabditis elegans	Illumina HiSeq 2000	GEO	SRP042044	Innate host defense requires TFEB-mediated transcription of cytoprotective and antimicrobial genes	SRS609504	11219832	471232944		RNA-Seq	TRANSCRIPTOMIC	cDNA
SRR1290427	SRX545693	GSM1387890: N2_SA_rep1; Caenorhabditis elegans; RNA-Seq	Caenorhabditis elegans	Illumina HiSeq 2000	GEO	SRP042044	Innate host defense requires TFEB-mediated transcription of cytoprotective and antimicrobial genes	SRS609505	11630550	488483100		RNA-Seq	TRANSCRIPTOMIC	cDNA
SRR1290428	SRX545694	GSM1387891: hlh30_OP50_rep1; Caenorhabditis elegans; RNA-Seq	Caenorhabditis elegans	Illumina HiSeq 2000	GEO	SRP042044	Innate host defense requires TFEB-mediated transcription of cytoprotective and antimicrobial genes	SRS609510		181.94	1	11502365	483099330		RNA-Seq	TRANSCRIPTOMIC	cDNA
SRR1290429	SRX545695	GSM1387892: hlh30_SA_rep1; Caenorhabditis elegans; RNA-Seq	Caenorhabditis elegans	Illumina HiSeq 2000	GEO	SRP042044	Innate host defense requires TFEB-mediated transcription of cytoprotective and antimicrobial genes	SRS609506		214	1	13433320	564199440		RNA-Seq	TRANSCRIPTOMIC	cDNA
SRR1290430	SRX545696	GSM1387893: N2_OP50_rep2; Caenorhabditis elegans; RNA-Seq	Caenorhabditis elegans	Illumina HiSeq 2000	GEO	SRP042044	Innate host defense requires TFEB-mediated transcription of cytoprotective and antimicrobial genes	SRS609507	13341375	560337750		RNA-Seq	TRANSCRIPTOMIC	cDNA
SRR1290431	SRX545697	GSM1387894: N2_SA_rep2; Caenorhabditis elegans; RNA-Seq	Caenorhabditis elegans	Illumina HiSeq 2000	GEO	SRP042044	Innate host defense requires TFEB-mediated transcription of cytoprotective and antimicrobial genes	SRS609508	11383914	478124388		RNA-Seq	TRANSCRIPTOMIC	cDNA
SRR1290432	SRX545698	GSM1387895: hlh30_OP50_rep2; Caenorhabditis elegans; RNA-Seq	Caenorhabditis elegans	Illumina HiSeq 2000	GEO	SRP042044	Innate host defense requires TFEB-mediated transcription of cytoprotective and antimicrobial genes	SRS609509		185.87	1	11690588	491004696		RNA-Seq	TRANSCRIPTOMIC	cDNA
SRR1290433	SRX545699	GSM1387896: hlh30_SA_rep2; Caenorhabditis elegans; RNA-Seq	Caenorhabditis elegans	Illumina HiSeq 2000	GEO	SRP042044	Innate host defense requires TFEB-mediated transcription of cytoprotective and antimicrobial genes	SRS609511		201.67	1	12609269	529589298		RNA-Seq	TRANSCRIPTOMIC	cDNA
SRR1301075 SRR1301076	SRX554727	GSM1399635: mRNA_WT; Caenorhabditis elegans; RNA-Seq	Caenorhabditis elegans	Illumina HiSeq 2000	GEO	SRP042338	Endogenous germline nuclear RNAi-mediated transcriptional silencing and histone H3 lysine 9 methylation in defined regions of the Caenorhabditis elegans genome	SRS621993	4604149	234811599		RNA-Seq	TRANSCRIPTOMIC	cDNA
SRR1301077 SRR1301078	SRX554728	GSM1399636: mRNA_hrde1; Caenorhabditis elegans; RNA-Seq	Caenorhabditis elegans	Illumina HiSeq 2000	GEO	SRP042338	Endogenous germline nuclear RNAi-mediated transcriptional silencing and histone H3 lysine 9 methylation in defined regions of the Caenorhabditis elegans genome	SRS621994		132.08	2	4041453	206114103		RNA-Seq	TRANSCRIPTOMIC	cDNA
SRR1301079	SRX554729	GSM1399637: mRNA_nrde2; Caenorhabditis elegans; RNA-Seq	Caenorhabditis elegans	Illumina HiSeq 2000	GEO	SRP042338	Endogenous germline nuclear RNAi-mediated transcriptional silencing and histone H3 lysine 9 methylation in defined regions of the Caenorhabditis elegans genome	SRS621995		77.79	1	2207948	112605348		RNA-Seq	TRANSCRIPTOMIC	cDNA
SRR1301080	SRX554730	GSM1399638: mRNA_nrde4; Caenorhabditis elegans; RNA-Seq	Caenorhabditis elegans	Illumina HiSeq 2000	GEO	SRP042338	Endogenous germline nuclear RNAi-mediated transcriptional silencing and histone H3 lysine 9 methylation in defined regions of the Caenorhabditis elegans genome	SRS621996		74.71	1	2124213	108334863		RNA-Seq	TRANSCRIPTOMIC	cDNA
SRR1301081	SRX554731	GSM1399639: mRNA_nrde3; Caenorhabditis elegans; RNA-Seq	Caenorhabditis elegans	Illumina HiSeq 2000	GEO	SRP042338	Endogenous germline nuclear RNAi-mediated transcriptional silencing and histone H3 lysine 9 methylation in defined regions of the Caenorhabditis elegans genome	SRS621997		78.88	1	2172208	110782608		RNA-Seq	TRANSCRIPTOMIC	cDNA
SRR1313054	SRX559705	GSM1402305: 1-cell embryos (polyA replicate 1); Caenorhabditis elegans; RNA-Seq	Caenorhabditis elegans	Illumina Genome Analyzer IIx	GEO	SRP042619	Global characterization of the oocyte-to-embryo transition in C. elegans uncovers a novel mRNA turnover mechanism	SRS624249		5023.36	1	42072663	8498677926		RNA-Seq	TRANSCRIPTOMIC	cDNA
SRR1313055	SRX559706	GSM1402306: 1-cell embryos (polyA replicate 2); Caenorhabditis elegans; RNA-Seq	Caenorhabditis elegans	Illumina Genome Analyzer IIx	GEO	SRP042619	Global characterization of the oocyte-to-embryo transition in C. elegans uncovers a novel mRNA turnover mechanism	SRS624250		5023.36	1	42072663	8498677926		RNA-Seq	TRANSCRIPTOMIC	cDNA
SRR1313056	SRX559707	GSM1402307: 2-cell embryos (polyA replicate 1); Caenorhabditis elegans; RNA-Seq	Caenorhabditis elegans	Illumina Genome Analyzer IIx	GEO	SRP042619	Global characterization of the oocyte-to-embryo transition in C. elegans uncovers a novel mRNA turnover mechanism	SRS624251		4236.39	1	35380262	7146812924		RNA-Seq	TRANSCRIPTOMIC	cDNA
SRR1313057	SRX559708	GSM1402308: 2-cell embryos (polyA replicate 2); Caenorhabditis elegans; RNA-Seq	Caenorhabditis elegans	Illumina Genome Analyzer IIx	GEO	SRP042619	Global characterization of the oocyte-to-embryo transition in C. elegans uncovers a novel mRNA turnover mechanism	SRS624252		4236.39	1	35380262	7146812924		RNA-Seq	TRANSCRIPTOMIC	cDNA
SRR1313058	SRX559709	GSM1402309: oocytes (polyA replicate 1); Caenorhabditis elegans; RNA-Seq	Caenorhabditis elegans	Illumina HiSeq 2000	GEO	SRP042619	Global characterization of the oocyte-to-embryo transition in C. elegans uncovers a novel mRNA turnover mechanism	SRS624253		20742.2	1	162364850	32797699700		RNA-Seq	TRANSCRIPTOMIC	cDNA
SRR1313059	SRX559710	GSM1402310: oocytes (polyA replicate 2); Caenorhabditis elegans; RNA-Seq	Caenorhabditis elegans	Illumina HiSeq 2000	GEO	SRP042619	Global characterization of the oocyte-to-embryo transition in C. elegans uncovers a novel mRNA turnover mechanism	SRS624254		19315.4	1	164282567	33185078534		RNA-Seq	TRANSCRIPTOMIC	cDNA
SRR1313060	SRX559711	GSM1402311: sperm (polyA replicate 1); Caenorhabditis elegans; RNA-Seq	Caenorhabditis elegans	Illumina Genome Analyzer IIx	GEO	SRP042619	Global characterization of the oocyte-to-embryo transition in C. elegans uncovers a novel mRNA turnover mechanism	SRS624255		3574.9	1	41266636	6272528672		RNA-Seq	TRANSCRIPTOMIC	cDNA
SRR1313061	SRX559712	GSM1402312: sperm (polyA replicate 2); Caenorhabditis elegans; RNA-Seq	Caenorhabditis elegans	Illumina Genome Analyzer IIx	GEO	SRP042619	Global characterization of the oocyte-to-embryo transition in C. elegans uncovers a novel mRNA turnover mechanism	SRS624256		3574.9	1	41266636	6272528672		RNA-Seq	TRANSCRIPTOMIC	cDNA
SRR1501343	SRX641427	GSM1422423: N2, rep1; Caenorhabditis elegans; RNA-Seq	Caenorhabditis elegans	Illumina HiSeq 2000	GEO	SRP043683	Neuronal CRTC-1 governs systemic mitochondrial metabolism and lifespan via a catecholamine signal	SRS650378	17130298	1713029800		RNA-Seq	TRANSCRIPTOMIC	cDNA
SRR1501344	SRX641428	GSM1422424: CA-CRTC-1S76A, S179A, rep1; Caenorhabditis elegans; RNA-Seq	Caenorhabditis elegans	Illumina HiSeq 2000	GEO	SRP043683	Neuronal CRTC-1 governs systemic mitochondrial metabolism and lifespan via a catecholamine signal	SRS650377		1173.92	1	20609944	2060994400		RNA-Seq	TRANSCRIPTOMIC	cDNA
SRR1501345	SRX641429	GSM1422425: CA-AAK-2, rep1; Caenorhabditis elegans; RNA-Seq	Caenorhabditis elegans	Illumina HiSeq 2000	GEO	SRP043683	Neuronal CRTC-1 governs systemic mitochondrial metabolism and lifespan via a catecholamine signal	SRS650379		1199.12	1	21174675	2117467500		RNA-Seq	TRANSCRIPTOMIC	cDNA
SRR1501346	SRX641430	GSM1422426: CA-AAK-2;CA-CRTC-1S76A, S179A, rep1; Caenorhabditis elegans; RNA-Seq	Caenorhabditis elegans	Illumina HiSeq 2000	GEO	SRP043683	Neuronal CRTC-1 governs systemic mitochondrial metabolism and lifespan via a catecholamine signal	SRS650380		1226.05	1	21668233	2166823300		RNA-Seq	TRANSCRIPTOMIC	cDNA
SRR1501347	SRX641431	GSM1422427: N2, rep2; Caenorhabditis elegans; RNA-Seq	Caenorhabditis elegans	Illumina HiSeq 2000	GEO	SRP043683	Neuronal CRTC-1 governs systemic mitochondrial metabolism and lifespan via a catecholamine signal	SRS650381	27066699	2706669900		RNA-Seq	TRANSCRIPTOMIC	cDNA
SRR1501348	SRX641432	GSM1422428: CA-CRTC-1S76A, S179A, rep2; Caenorhabditis elegans; RNA-Seq	Caenorhabditis elegans	Illumina HiSeq 2000	GEO	SRP043683	Neuronal CRTC-1 governs systemic mitochondrial metabolism and lifespan via a catecholamine signal	SRS650382		1690.43	1	26745778	2674577800		RNA-Seq	TRANSCRIPTOMIC	cDNA
SRR1501349	SRX641433	GSM1422429: CA-AAK-2, rep2; Caenorhabditis elegans; RNA-Seq	Caenorhabditis elegans	Illumina HiSeq 2000	GEO	SRP043683	Neuronal CRTC-1 governs systemic mitochondrial metabolism and lifespan via a catecholamine signal	SRS650383		1733.07	1	27308841	2730884100		RNA-Seq	TRANSCRIPTOMIC	cDNA
SRR1501350	SRX641434	GSM1422430: CA-AAK-2;CA-CRTC-1S76A, S179A, rep2; Caenorhabditis elegans; RNA-Seq	Caenorhabditis elegans	Illumina HiSeq 2000	GEO	SRP043683	Neuronal CRTC-1 governs systemic mitochondrial metabolism and lifespan via a catecholamine signal	SRS650385		1251.98	1	19879475	1987947500		RNA-Seq	TRANSCRIPTOMIC	cDNA
SRR1501351	SRX641435	GSM1422431: N2, rep3; Caenorhabditis elegans; RNA-Seq	Caenorhabditis elegans	Illumina HiSeq 2000	GEO	SRP043683	Neuronal CRTC-1 governs systemic mitochondrial metabolism and lifespan via a catecholamine signal	SRS650384	27242768	2724276800		RNA-Seq	TRANSCRIPTOMIC	cDNA
SRR1501352	SRX641436	GSM1422432: CA-CRTC-1S76A, S179A, rep3; Caenorhabditis elegans; RNA-Seq	Caenorhabditis elegans	Illumina HiSeq 2000	GEO	SRP043683	Neuronal CRTC-1 governs systemic mitochondrial metabolism and lifespan via a catecholamine signal	SRS650387		1206.3	1	20743046	2074304600		RNA-Seq	TRANSCRIPTOMIC	cDNA
SRR1501353	SRX641437	GSM1422433: CA-AAK-2, rep3; Caenorhabditis elegans; RNA-Seq	Caenorhabditis elegans	Illumina HiSeq 2000	GEO	SRP043683	Neuronal CRTC-1 governs systemic mitochondrial metabolism and lifespan via a catecholamine signal	SRS650386		1051.59	1	17860031	1786003100		RNA-Seq	TRANSCRIPTOMIC	cDNA
SRR1501354	SRX641438	GSM1422434: CA-AAK-2;CA-CRTC-1S76A, S179A, rep3; Caenorhabditis elegans; RNA-Seq	Caenorhabditis elegans	Illumina HiSeq 2000	GEO	SRP043683	Neuronal CRTC-1 governs systemic mitochondrial metabolism and lifespan via a catecholamine signal	SRS650388		1360.26	1	23300166	2330016600		RNA-Seq	TRANSCRIPTOMIC	cDNA
SRR1503621 SRR1503622 SRR1503623 SRR1503624	SRX643418	GSM1422276: Input_control_rep1; Caenorhabditis elegans; RNA-Seq	Caenorhabditis elegans	Illumina HiSeq 2000	GEO	SRP043990	The cytoplasmic poly(A) polymerases GLD-2 and GLD-4 promote general gene expression via distinct mechanisms	SRS652220	15822657	1202521932		RNA-Seq	TRANSCRIPTOMIC	cDNA
SRR1503625 SRR1503626 SRR1503627 SRR1503628	SRX643419	GSM1422277: Input_control_rep2; Caenorhabditis elegans; RNA-Seq	Caenorhabditis elegans	Illumina HiSeq 2000	GEO	SRP043990	The cytoplasmic poly(A) polymerases GLD-2 and GLD-4 promote general gene expression via distinct mechanisms	SRS652221	19074504	1449662304		RNA-Seq	TRANSCRIPTOMIC	cDNA
SRR1503629 SRR1503630 SRR1503631 SRR1503632	SRX643420	GSM1422278: Input_control_rep3; Caenorhabditis elegans; RNA-Seq	Caenorhabditis elegans	Illumina HiSeq 2000	GEO	SRP043990	The cytoplasmic poly(A) polymerases GLD-2 and GLD-4 promote general gene expression via distinct mechanisms	SRS652222	23507400	1786562400		RNA-Seq	TRANSCRIPTOMIC	cDNA
SRR1503633 SRR1503634 SRR1503635 SRR1503636	SRX643421	GSM1422279: Input_gld2(RNAi)_rep1; Caenorhabditis elegans; RNA-Seq	Caenorhabditis elegans	Illumina HiSeq 2000	GEO	SRP043990	The cytoplasmic poly(A) polymerases GLD-2 and GLD-4 promote general gene expression via distinct mechanisms	SRS652223		1073.21	4	19386495	1473373620		RNA-Seq	TRANSCRIPTOMIC	cDNA
SRR1503637 SRR1503638 SRR1503639 SRR1503640	SRX643422	GSM1422280: Input_gld2(RNAi)_rep2; Caenorhabditis elegans; RNA-Seq	Caenorhabditis elegans	Illumina HiSeq 2000	GEO	SRP043990	The cytoplasmic poly(A) polymerases GLD-2 and GLD-4 promote general gene expression via distinct mechanisms	SRS652224		1134.1	4	20549146	1561735096		RNA-Seq	TRANSCRIPTOMIC	cDNA
SRR1503641 SRR1503642 SRR1503643 SRR1503644	SRX643423	GSM1422281: Input_gld2(RNAi)_rep3; Caenorhabditis elegans; RNA-Seq	Caenorhabditis elegans	Illumina HiSeq 2000	GEO	SRP043990	The cytoplasmic poly(A) polymerases GLD-2 and GLD-4 promote general gene expression via distinct mechanisms	SRS652225		1410.83	4	25701674	1953327224		RNA-Seq	TRANSCRIPTOMIC	cDNA
SRR1503645 SRR1503646 SRR1503647 SRR1503648	SRX643424	GSM1422282: Input_gld4(RNAi)_rep1; Caenorhabditis elegans; RNA-Seq	Caenorhabditis elegans	Illumina HiSeq 2000	GEO	SRP043990	The cytoplasmic poly(A) polymerases GLD-2 and GLD-4 promote general gene expression via distinct mechanisms	SRS652226		1151.25	4	20813291	1581810116		RNA-Seq	TRANSCRIPTOMIC	cDNA
SRR1503649 SRR1503650 SRR1503651 SRR1503652	SRX643425	GSM1422283: Input_gld4(RNAi)_rep2; Caenorhabditis elegans; RNA-Seq	Caenorhabditis elegans	Illumina HiSeq 2000	GEO	SRP043990	The cytoplasmic poly(A) polymerases GLD-2 and GLD-4 promote general gene expression via distinct mechanisms	SRS652227		1178.63	4	21419703	1627897428		RNA-Seq	TRANSCRIPTOMIC	cDNA
SRR1503653 SRR1503654 SRR1503655 SRR1503656	SRX643426	GSM1422284: Input_gld4(RNAi)_rep3; Caenorhabditis elegans; RNA-Seq	Caenorhabditis elegans	Illumina HiSeq 2000	GEO	SRP043990	The cytoplasmic poly(A) polymerases GLD-2 and GLD-4 promote general gene expression via distinct mechanisms	SRS652228		1366.2	4	24881288	1890977888		RNA-Seq	TRANSCRIPTOMIC	cDNA
SRR1503657 SRR1503658 SRR1503659 SRR1503660	SRX643427	GSM1422285: non-polysome control_rep1; Caenorhabditis elegans; RNA-Seq	Caenorhabditis elegans	Illumina HiSeq 2000	GEO	SRP043990	The cytoplasmic poly(A) polymerases GLD-2 and GLD-4 promote general gene expression via distinct mechanisms	SRS652229	18423900	1400216400		RNA-Seq	TRANSCRIPTOMIC	cDNA
SRR1503661 SRR1503662 SRR1503663 SRR1503664	SRX643428	GSM1422286: non-polysome control_rep2; Caenorhabditis elegans; RNA-Seq	Caenorhabditis elegans	Illumina HiSeq 2000	GEO	SRP043990	The cytoplasmic poly(A) polymerases GLD-2 and GLD-4 promote general gene expression via distinct mechanisms	SRS652230	21970693	1669772668		RNA-Seq	TRANSCRIPTOMIC	cDNA
SRR1503665 SRR1503666 SRR1503667 SRR1503668	SRX643429	GSM1422287: non-polysome control_rep3; Caenorhabditis elegans; RNA-Seq	Caenorhabditis elegans	Illumina HiSeq 2000	GEO	SRP043990	The cytoplasmic poly(A) polymerases GLD-2 and GLD-4 promote general gene expression via distinct mechanisms	SRS652231	18234039	1385786964		RNA-Seq	TRANSCRIPTOMIC	cDNA
SRR1503669 SRR1503670 SRR1503671 SRR1503672	SRX643430	GSM1422288: non-polysome gld2(RNAi)_rep1; Caenorhabditis elegans; RNA-Seq	Caenorhabditis elegans	Illumina HiSeq 2000	GEO	SRP043990	The cytoplasmic poly(A) polymerases GLD-2 and GLD-4 promote general gene expression via distinct mechanisms	SRS652232		968.65	4	17601850	1337740600		RNA-Seq	TRANSCRIPTOMIC	cDNA
SRR1503673 SRR1503674 SRR1503675 SRR1503676	SRX643431	GSM1422289: non-polysome gld2(RNAi)_rep2; Caenorhabditis elegans; RNA-Seq	Caenorhabditis elegans	Illumina HiSeq 2000	GEO	SRP043990	The cytoplasmic poly(A) polymerases GLD-2 and GLD-4 promote general gene expression via distinct mechanisms	SRS652233		1378.36	4	25020585	1901564460		RNA-Seq	TRANSCRIPTOMIC	cDNA
SRR1503677 SRR1503678 SRR1503679 SRR1503680	SRX643432	GSM1422290: non-polysome gld2(RNAi)_rep3; Caenorhabditis elegans; RNA-Seq	Caenorhabditis elegans	Illumina HiSeq 2000	GEO	SRP043990	The cytoplasmic poly(A) polymerases GLD-2 and GLD-4 promote general gene expression via distinct mechanisms	SRS652234		1138.35	4	20767826	1578354776		RNA-Seq	TRANSCRIPTOMIC	cDNA
SRR1503681 SRR1503682 SRR1503683 SRR1503684	SRX643433	GSM1422291: non-polysome gld4(RNAi)_rep1; Caenorhabditis elegans; RNA-Seq	Caenorhabditis elegans	Illumina HiSeq 2000	GEO	SRP043990	The cytoplasmic poly(A) polymerases GLD-2 and GLD-4 promote general gene expression via distinct mechanisms	SRS652235		995.27	4	18051308	1371899408		RNA-Seq	TRANSCRIPTOMIC	cDNA
SRR1503685 SRR1503686 SRR1503687 SRR1503688	SRX643434	GSM1422292: non-polysome gld4(RNAi)_rep2; Caenorhabditis elegans; RNA-Seq	Caenorhabditis elegans	Illumina HiSeq 2000	GEO	SRP043990	The cytoplasmic poly(A) polymerases GLD-2 and GLD-4 promote general gene expression via distinct mechanisms	SRS652236		1079.89	4	19546412	1485527312		RNA-Seq	TRANSCRIPTOMIC	cDNA
SRR1503689 SRR1503690 SRR1503691 SRR1503692	SRX643435	GSM1422293: non-polysome gld4(RNAi)_rep3; Caenorhabditis elegans; RNA-Seq	Caenorhabditis elegans	Illumina HiSeq 2000	GEO	SRP043990	The cytoplasmic poly(A) polymerases GLD-2 and GLD-4 promote general gene expression via distinct mechanisms	SRS652237		1092.18	4	19791566	1504159016		RNA-Seq	TRANSCRIPTOMIC	cDNA
SRR1503693 SRR1503694 SRR1503695 SRR1503696	SRX643436	GSM1422294: polysome control_rep1; Caenorhabditis elegans; RNA-Seq	Caenorhabditis elegans	Illumina HiSeq 2000	GEO	SRP043990	The cytoplasmic poly(A) polymerases GLD-2 and GLD-4 promote general gene expression via distinct mechanisms	SRS652238	17751465	1349111340		RNA-Seq	TRANSCRIPTOMIC	cDNA
SRR1503697 SRR1503698 SRR1503699 SRR1503700	SRX643437	GSM1422295: polysome control_rep2; Caenorhabditis elegans; RNA-Seq	Caenorhabditis elegans	Illumina HiSeq 2000	GEO	SRP043990	The cytoplasmic poly(A) polymerases GLD-2 and GLD-4 promote general gene expression via distinct mechanisms	SRS652239	19163515	1456427140		RNA-Seq	TRANSCRIPTOMIC	cDNA
SRR1503701 SRR1503702 SRR1503703 SRR1503704	SRX643438	GSM1422296: polysome control_rep3; Caenorhabditis elegans; RNA-Seq	Caenorhabditis elegans	Illumina HiSeq 2000	GEO	SRP043990	The cytoplasmic poly(A) polymerases GLD-2 and GLD-4 promote general gene expression via distinct mechanisms	SRS652240	21174978	1609298328		RNA-Seq	TRANSCRIPTOMIC	cDNA
SRR1503705 SRR1503706 SRR1503707 SRR1503708	SRX643439	GSM1422297: polysome gld2(RNAi)_rep1; Caenorhabditis elegans; RNA-Seq	Caenorhabditis elegans	Illumina HiSeq 2000	GEO	SRP043990	The cytoplasmic poly(A) polymerases GLD-2 and GLD-4 promote general gene expression via distinct mechanisms	SRS652241		1102.89	4	20015051	1521143876		RNA-Seq	TRANSCRIPTOMIC	cDNA
SRR1503709 SRR1503710 SRR1503711 SRR1503712	SRX643440	GSM1422298: polysome gld2(RNAi)_rep2; Caenorhabditis elegans; RNA-Seq	Caenorhabditis elegans	Illumina HiSeq 2000	GEO	SRP043990	The cytoplasmic poly(A) polymerases GLD-2 and GLD-4 promote general gene expression via distinct mechanisms	SRS652242		1098.15	4	19847004	1508372304		RNA-Seq	TRANSCRIPTOMIC	cDNA
SRR1503713 SRR1503714 SRR1503715 SRR1503716	SRX643441	GSM1422299: polysome gld2(RNAi)_rep3; Caenorhabditis elegans; RNA-Seq	Caenorhabditis elegans	Illumina HiSeq 2000	GEO	SRP043990	The cytoplasmic poly(A) polymerases GLD-2 and GLD-4 promote general gene expression via distinct mechanisms	SRS652243		1152.77	4	20930262	1590699912		RNA-Seq	TRANSCRIPTOMIC	cDNA
SRR1503717 SRR1503718 SRR1503719 SRR1503720	SRX643442	GSM1422300: polysome gld4(RNAi)_rep1; Caenorhabditis elegans; RNA-Seq	Caenorhabditis elegans	Illumina HiSeq 2000	GEO	SRP043990	The cytoplasmic poly(A) polymerases GLD-2 and GLD-4 promote general gene expression via distinct mechanisms	SRS652244		1093.88	4	19829337	1507029612		RNA-Seq	TRANSCRIPTOMIC	cDNA
SRR1503721 SRR1503722 SRR1503723 SRR1503724	SRX643443	GSM1422301: polysome gld4(RNAi)_rep2; Caenorhabditis elegans; RNA-Seq	Caenorhabditis elegans	Illumina HiSeq 2000	GEO	SRP043990	The cytoplasmic poly(A) polymerases GLD-2 and GLD-4 promote general gene expression via distinct mechanisms	SRS652245		1100.66	4	19960592	1517004992		RNA-Seq	TRANSCRIPTOMIC	cDNA
SRR1503725 SRR1503726 SRR1503727 SRR1503728	SRX643444	GSM1422302: polysome gld4(RNAi)_rep3; Caenorhabditis elegans; RNA-Seq	Caenorhabditis elegans	Illumina HiSeq 2000	GEO	SRP043990	The cytoplasmic poly(A) polymerases GLD-2 and GLD-4 promote general gene expression via distinct mechanisms	SRS652246		1163.19	4	21103423	1603860148		RNA-Seq	TRANSCRIPTOMIC	cDNA
SRR1523361	SRX659943	GSM1443914: control rep1; Caenorhabditis elegans; RNA-Seq	Caenorhabditis elegans	Illumina Genome Analyzer IIx	GEO	SRP044752	The role of SPK-1 in alternative splicing regulation in C. elegans	SRS664942	38073370	5787152240		RNA-Seq	TRANSCRIPTOMIC	cDNA
SRR1523362	SRX659944	GSM1443915: spk-1(RNAi) rep1; Caenorhabditis elegans; RNA-Seq	Caenorhabditis elegans	Illumina Genome Analyzer IIx	GEO	SRP044752	The role of SPK-1 in alternative splicing regulation in C. elegans	SRS664943		2297.14	1	23290441	3540147032		RNA-Seq	TRANSCRIPTOMIC	cDNA
SRR1523363	SRX659945	GSM1443916: control rep2; Caenorhabditis elegans; RNA-Seq	Caenorhabditis elegans	Illumina Genome Analyzer IIx	GEO	SRP044752	The role of SPK-1 in alternative splicing regulation in C. elegans	SRS664944	19930170	3029385840		RNA-Seq	TRANSCRIPTOMIC	cDNA
SRR1523364	SRX659946	GSM1443917: spk-1(RNAi) rep2; Caenorhabditis elegans; RNA-Seq	Caenorhabditis elegans	Illumina Genome Analyzer IIx	GEO	SRP044752	The role of SPK-1 in alternative splicing regulation in C. elegans	SRS664945		1364.57	1	15928789	2421175928		RNA-Seq	TRANSCRIPTOMIC	cDNA
SRR1523365	SRX659947	GSM1443918: control rep3; Caenorhabditis elegans; RNA-Seq	Caenorhabditis elegans	Illumina HiSeq 2000	GEO	SRP044752	The role of SPK-1 in alternative splicing regulation in C. elegans	SRS664946	228557939	45711587800		RNA-Seq	TRANSCRIPTOMIC	cDNA
SRR1523366	SRX659948	GSM1443919: spk-1(RNAi) rep3; Caenorhabditis elegans; RNA-Seq	Caenorhabditis elegans	Illumina HiSeq 2000	GEO	SRP044752	The role of SPK-1 in alternative splicing regulation in C. elegans	SRS664947		32040.9	1	228124656	45624931200		RNA-Seq	TRANSCRIPTOMIC	cDNA
SRR1523367	SRX659949	GSM1443920: control rep4; Caenorhabditis elegans; RNA-Seq	Caenorhabditis elegans	Illumina HiSeq 2000	GEO	SRP044752	The role of SPK-1 in alternative splicing regulation in C. elegans	SRS664948	185023201	37004640200		RNA-Seq	TRANSCRIPTOMIC	cDNA
SRR1523368	SRX659950	GSM1443921: spk-1(RNAi) rep4; Caenorhabditis elegans; RNA-Seq	Caenorhabditis elegans	Illumina HiSeq 2000	GEO	SRP044752	The role of SPK-1 in alternative splicing regulation in C. elegans	SRS664949		28839.5	1	207154392	41430878400		RNA-Seq	TRANSCRIPTOMIC	cDNA
SRR1523642	SRX660418	GSM1444159: BSW007i4; Caenorhabditis elegans; RNA-Seq	Caenorhabditis elegans	Illumina HiSeq 2000	GEO	SRP044765	Condensin-Driven Remodeling of X-Chromosome Topology during Dosage Compensation [RNA-Seq]	SRS665417		4860.29	1	78016028	7801602800		RNA-Seq	TRANSCRIPTOMIC	cDNA
SRR1523643	SRX660419	GSM1444160: BSW008i4; Caenorhabditis elegans; RNA-Seq	Caenorhabditis elegans	Illumina HiSeq 2000	GEO	SRP044765	Condensin-Driven Remodeling of X-Chromosome Topology during Dosage Compensation [RNA-Seq]	SRS665418		3904.13	1	62509123	6250912300		RNA-Seq	TRANSCRIPTOMIC	cDNA
SRR1523644	SRX660420	GSM1444161: BSW0012i4; Caenorhabditis elegans; RNA-Seq	Caenorhabditis elegans	Illumina HiSeq 2000	GEO	SRP044765	Condensin-Driven Remodeling of X-Chromosome Topology during Dosage Compensation [RNA-Seq]	SRS665419		2605.13	1	42600634	4260063400		RNA-Seq	TRANSCRIPTOMIC	cDNA
SRR1523645	SRX660421	GSM1444162: BSW0011i4; Caenorhabditis elegans; RNA-Seq	Caenorhabditis elegans	Illumina HiSeq 2000	GEO	SRP044765	Condensin-Driven Remodeling of X-Chromosome Topology during Dosage Compensation [RNA-Seq]	SRS665420		2256.35	1	36999279	3699927900		RNA-Seq	TRANSCRIPTOMIC	cDNA
SRR1523646	SRX660422	GSM1444163: BSW007i5; Caenorhabditis elegans; RNA-Seq	Caenorhabditis elegans	Illumina HiSeq 2000	GEO	SRP044765	Condensin-Driven Remodeling of X-Chromosome Topology during Dosage Compensation [RNA-Seq]	SRS665421		2134.79	1	31101142	3110114200		RNA-Seq	TRANSCRIPTOMIC	cDNA
SRR1523647	SRX660423	GSM1444164: BSW008i5; Caenorhabditis elegans; RNA-Seq	Caenorhabditis elegans	Illumina HiSeq 2000	GEO	SRP044765	Condensin-Driven Remodeling of X-Chromosome Topology during Dosage Compensation [RNA-Seq]	SRS665422		3881.95	1	59225720	5922572000		RNA-Seq	TRANSCRIPTOMIC	cDNA
SRR1523648	SRX660424	GSM1444165: BSW0012i5; Caenorhabditis elegans; RNA-Seq	Caenorhabditis elegans	Illumina HiSeq 2000	GEO	SRP044765	Condensin-Driven Remodeling of X-Chromosome Topology during Dosage Compensation [RNA-Seq]	SRS665423		5301.37	1	80708485	8070848500		RNA-Seq	TRANSCRIPTOMIC	cDNA
SRR1532959	SRX666563	GSM1462555: AB_rep1; Caenorhabditis elegans; RNA-Seq	Caenorhabditis elegans	Illumina Genome Analyzer II	GEO	SRP045110	Blastomere-specific transcriptome sequencing reveals a determinant of anterior specification in C. elegans	SRS671252		768.79	1	35677382	1284385752		RNA-Seq	TRANSCRIPTOMIC	cDNA
SRR1532960	SRX666564	GSM1462556: P1_rep1; Caenorhabditis elegans; RNA-Seq	Caenorhabditis elegans	Illumina Genome Analyzer II	GEO	SRP045110	Blastomere-specific transcriptome sequencing reveals a determinant of anterior specification in C. elegans	SRS671253		686.31	1	32219378	1159897608		RNA-Seq	TRANSCRIPTOMIC	cDNA
SRR1532961	SRX666565	GSM1462557: AB_rep2; Caenorhabditis elegans; RNA-Seq	Caenorhabditis elegans	Illumina HiSeq 2000	GEO	SRP045110	Blastomere-specific transcriptome sequencing reveals a determinant of anterior specification in C. elegans	SRS671255		1107.36	1	42346241	2117312050		RNA-Seq	TRANSCRIPTOMIC	cDNA
SRR1532962	SRX666566	GSM1462558: P1_rep2; Caenorhabditis elegans; RNA-Seq	Caenorhabditis elegans	Illumina HiSeq 2000	GEO	SRP045110	Blastomere-specific transcriptome sequencing reveals a determinant of anterior specification in C. elegans	SRS671256		702.94	1	28200251	1410012550		RNA-Seq	TRANSCRIPTOMIC	cDNA
SRR1532963	SRX666567	GSM1462559: AB_rep3; Caenorhabditis elegans; RNA-Seq	Caenorhabditis elegans	Illumina HiSeq 2000	GEO	SRP045110	Blastomere-specific transcriptome sequencing reveals a determinant of anterior specification in C. elegans	SRS671257		2483.36	1	82082241	4104112050		RNA-Seq	TRANSCRIPTOMIC	cDNA
SRR1532964	SRX666568	GSM1462560: P1_rep3; Caenorhabditis elegans; RNA-Seq	Caenorhabditis elegans	Illumina HiSeq 2000	GEO	SRP045110	Blastomere-specific transcriptome sequencing reveals a determinant of anterior specification in C. elegans	SRS671258		2083.69	1	70140664	3507033200		RNA-Seq	TRANSCRIPTOMIC	cDNA
SRR1550969	SRX680529	GSM1479384: Wild Type rep 1 [RNA-Seq]; Caenorhabditis elegans; RNA-Seq	Caenorhabditis elegans	Illumina HiSeq 2000	GEO	SRP045499	Cooperative target mRNA destabilization and translation inhibition by miR-58 microRNA family in C. elegans [RNA-Seq]	SRS684208	31439588	1603418988		RNA-Seq	TRANSCRIPTOMIC	cDNA
SRR1550970	SRX680530	GSM1479385: Wild Type rep 2 [RNA-Seq]; Caenorhabditis elegans; RNA-Seq	Caenorhabditis elegans	Illumina HiSeq 2000	GEO	SRP045499	Cooperative target mRNA destabilization and translation inhibition by miR-58 microRNA family in C. elegans [RNA-Seq]	SRS684209	38892656	1983525456		RNA-Seq	TRANSCRIPTOMIC	cDNA
SRR1550971	SRX680531	GSM1479386: Wild Type rep 3 [RNA-Seq]; Caenorhabditis elegans; RNA-Seq	Caenorhabditis elegans	Illumina HiSeq 2000	GEO	SRP045499	Cooperative target mRNA destabilization and translation inhibition by miR-58 microRNA family in C. elegans [RNA-Seq]	SRS684210	36547492	1863922092		RNA-Seq	TRANSCRIPTOMIC	cDNA
SRR1550972	SRX680532	GSM1479387: mir-58 rep 1 [RNA-Seq]; Caenorhabditis elegans; RNA-Seq	Caenorhabditis elegans	Illumina HiSeq 2000	GEO	SRP045499	Cooperative target mRNA destabilization and translation inhibition by miR-58 microRNA family in C. elegans [RNA-Seq]	SRS684211		1382.65	1	41768006	2130168306		RNA-Seq	TRANSCRIPTOMIC	cDNA
SRR1550973	SRX680533	GSM1479388: mir-58 rep 2 [RNA-Seq]; Caenorhabditis elegans; RNA-Seq	Caenorhabditis elegans	Illumina HiSeq 2000	GEO	SRP045499	Cooperative target mRNA destabilization and translation inhibition by miR-58 microRNA family in C. elegans [RNA-Seq]	SRS684212		1416.8	1	42786264	2182099464		RNA-Seq	TRANSCRIPTOMIC	cDNA
SRR1550974	SRX680534	GSM1479389: mir-58 rep 3 [RNA-Seq]; Caenorhabditis elegans; RNA-Seq	Caenorhabditis elegans	Illumina HiSeq 2000	GEO	SRP045499	Cooperative target mRNA destabilization and translation inhibition by miR-58 microRNA family in C. elegans [RNA-Seq]	SRS684213		1206.23	1	36320504	1852345704		RNA-Seq	TRANSCRIPTOMIC	cDNA
SRR1550975	SRX680535	GSM1479390: mir-80; mir-58 rep 1 [RNA-Seq]; Caenorhabditis elegans; RNA-Seq	Caenorhabditis elegans	Illumina HiSeq 2000	GEO	SRP045499	Cooperative target mRNA destabilization and translation inhibition by miR-58 microRNA family in C. elegans [RNA-Seq]	SRS684214		1459.32	1	44146250	2251458750		RNA-Seq	TRANSCRIPTOMIC	cDNA
SRR1550976	SRX680536	GSM1479391: mir-80; mir-58 rep 2 [RNA-Seq]; Caenorhabditis elegans; RNA-Seq	Caenorhabditis elegans	Illumina HiSeq 2000	GEO	SRP045499	Cooperative target mRNA destabilization and translation inhibition by miR-58 microRNA family in C. elegans [RNA-Seq]	SRS684215		1514.6	1	45888289	2340302739		RNA-Seq	TRANSCRIPTOMIC	cDNA
SRR1550977	SRX680537	GSM1479392: mir-80; mir-58 rep 3 [RNA-Seq]; Caenorhabditis elegans; RNA-Seq	Caenorhabditis elegans	Illumina HiSeq 2000	GEO	SRP045499	Cooperative target mRNA destabilization and translation inhibition by miR-58 microRNA family in C. elegans [RNA-Seq]	SRS684216		1500.96	1	45532717	2322168567		RNA-Seq	TRANSCRIPTOMIC	cDNA
SRR1550978	SRX680538	GSM1479393: mir-80; mir-58; mir-81-82 rep 1 [RNA-Seq]; Caenorhabditis elegans; RNA-Seq	Caenorhabditis elegans	Illumina HiSeq 2000	GEO	SRP045499	Cooperative target mRNA destabilization and translation inhibition by miR-58 microRNA family in C. elegans [RNA-Seq]	SRS684217		1415.44	1	42847648	2185230048		RNA-Seq	TRANSCRIPTOMIC	cDNA
SRR1550979	SRX680539	GSM1479394: mir-80; mir-58; mir-81-82 rep 2 [RNA-Seq]; Caenorhabditis elegans; RNA-Seq	Caenorhabditis elegans	Illumina HiSeq 2000	GEO	SRP045499	Cooperative target mRNA destabilization and translation inhibition by miR-58 microRNA family in C. elegans [RNA-Seq]	SRS684218		1525.71	1	46201997	2356301847		RNA-Seq	TRANSCRIPTOMIC	cDNA
SRR1550980	SRX680540	GSM1479395: mir-80; mir-58; mir-81-82 rep 3 [RNA-Seq]; Caenorhabditis elegans; RNA-Seq	Caenorhabditis elegans	Illumina HiSeq 2000	GEO	SRP045499	Cooperative target mRNA destabilization and translation inhibition by miR-58 microRNA family in C. elegans [RNA-Seq]	SRS684219		1400.51	1	41899671	2136883221		RNA-Seq	TRANSCRIPTOMIC	cDNA
SRR1556789	SRX685625	N2_P0_fed_mRNA	Caenorhabditis elegans	Illumina HiSeq 2500	Tel-Aviv University	SRP045742	Caenorhabditis elegans strain:N2, rde-4::unc-69, hrde-1 Transcriptome or Gene expression	SRS688475		232.83	1	9449164	472458200	N2_P0_fed_mRNA	RNA-Seq	TRANSCRIPTOMIC	unspecified
SRR1556790	SRX685626	N2_P0_starved_mRNA	Caenorhabditis elegans	Illumina HiSeq 2500	Tel-Aviv University	SRP045742	Caenorhabditis elegans strain:N2, rde-4::unc-69, hrde-1 Transcriptome or Gene expression	SRS688477		277.7	1	11268498	563424900	N2_P0_starved_mRNA	RNA-Seq	TRANSCRIPTOMIC	unspecified
SRR1556791	SRX685627	N2_F3_of_starved_worms_mRNA	Caenorhabditis elegans	Illumina HiSeq 2500	Tel-Aviv University	SRP045742	Caenorhabditis elegans strain:N2, rde-4::unc-69, hrde-1 Transcriptome or Gene expression	SRS688478		890.55	1	28818467	1440923350	N2_F3_of_starved_worms_mRNA	RNA-Seq	TRANSCRIPTOMIC	unspecified
SRR1556792	SRX685628	rde-4_P0_fed_mRNA	Caenorhabditis elegans	Illumina HiSeq 2500	Tel-Aviv University	SRP045742	Caenorhabditis elegans strain:N2, rde-4::unc-69, hrde-1 Transcriptome or Gene expression	SRS688479		210.56	1	8534337	426716850	rde-4_P0_fed_mRNA	RNA-Seq	TRANSCRIPTOMIC	unspecified
SRR1556793	SRX685629	rde-4_P0_starved_mRNA	Caenorhabditis elegans	Illumina HiSeq 2500	Tel-Aviv University	SRP045742	Caenorhabditis elegans strain:N2, rde-4::unc-69, hrde-1 Transcriptome or Gene expression	SRS688481		261.19	1	10614040	530702000	rde-4_P0_starved_mRNA	RNA-Seq	TRANSCRIPTOMIC	unspecified
SRR1556794	SRX685630	rde-4_F3_of_starved_worms_mRNA	Caenorhabditis elegans	Illumina HiSeq 2500	Tel-Aviv University	SRP045742	Caenorhabditis elegans strain:N2, rde-4::unc-69, hrde-1 Transcriptome or Gene expression	SRS688482		312.19	1	12718946	635947300	rde-4_F3_of_starved_worms_mRNA	RNA-Seq	TRANSCRIPTOMIC	unspecified
SRR1556795	SRX685631	hrde-1_P0_fed_mRNA	Caenorhabditis elegans	Illumina HiSeq 2500	Tel-Aviv University	SRP045742	Caenorhabditis elegans strain:N2, rde-4::unc-69, hrde-1 Transcriptome or Gene expression	SRS688483		363.37	1	14850940	742547000	hrde-1_P0_fed_mRNA	RNA-Seq	TRANSCRIPTOMIC	unspecified
SRR1556796	SRX685632	hrde-1_P0_starved_mRNA	Caenorhabditis elegans	Illumina HiSeq 2500	Tel-Aviv University	SRP045742	Caenorhabditis elegans strain:N2, rde-4::unc-69, hrde-1 Transcriptome or Gene expression	SRS688484		282.45	1	11505841	575292050	hrde-1_P0_starved_mRNA	RNA-Seq	TRANSCRIPTOMIC	unspecified
SRR1556797	SRX685633	hrde-1_F3_of_starved_worms_mRNA	Caenorhabditis elegans	Illumina HiSeq 2500	Tel-Aviv University	SRP045742	Caenorhabditis elegans strain:N2, rde-4::unc-69, hrde-1 Transcriptome or Gene expression	SRS688485		249.33	1	10113609	505680450	hrde-1_F3_of_starved_worms_mRNA	RNA-Seq	TRANSCRIPTOMIC	unspecified
SRR1560104	SRX688584	GSM1489483: Control RNAi Normoxia; Caenorhabditis elegans; RNA-Seq	Caenorhabditis elegans	Illumina HiSeq 2000	GEO	SRP045818	Genome wide RNA Sequencing of whole C. elegans RNA	SRS691154	43764543	7564564800		RNA-Seq	TRANSCRIPTOMIC	cDNA
SRR1560105	SRX688585	GSM1489484: Control RNAi Hypoxia; Caenorhabditis elegans; RNA-Seq	Caenorhabditis elegans	Illumina HiSeq 2000	GEO	SRP045818	Genome wide RNA Sequencing of whole C. elegans RNA	SRS691155	43871344	7570239750		RNA-Seq	TRANSCRIPTOMIC	cDNA
SRR1560106	SRX688586	GSM1489485: ELT-2 RNAi Normoxia; Caenorhabditis elegans; RNA-Seq	Caenorhabditis elegans	Illumina HiSeq 2000	GEO	SRP045818	Genome wide RNA Sequencing of whole C. elegans RNA	SRS691156		3016.83	1	37853850	6542884890		RNA-Seq	TRANSCRIPTOMIC	cDNA
SRR1560107	SRX688587	GSM1489486: ELT-2 RNAi Hypoxia; Caenorhabditis elegans; RNA-Seq	Caenorhabditis elegans	Illumina HiSeq 2000	GEO	SRP045818	Genome wide RNA Sequencing of whole C. elegans RNA	SRS691157		3928.51	1	49148098	8479341180		RNA-Seq	TRANSCRIPTOMIC	cDNA
SRR1578745	SRX704261	GSM1507712: Wild-type N2; Caenorhabditis elegans; RNA-Seq	Caenorhabditis elegans	Illumina HiSeq 2000	GEO	SRP047293	Differential gene expression in ahr-1 mutants compared to wild-type C. elegans	SRS703903	51093813	10218762600		RNA-Seq	TRANSCRIPTOMIC	cDNA
SRR1578746	SRX704262	GSM1507713: ahr-1(ia03) mutant; Caenorhabditis elegans; RNA-Seq	Caenorhabditis elegans	Illumina HiSeq 2000	GEO	SRP047293	Differential gene expression in ahr-1 mutants compared to wild-type C. elegans	SRS703905		7708.03	1	61237752	12247550400		RNA-Seq	TRANSCRIPTOMIC	cDNA
SRR1578747	SRX704263	GSM1507714: ahr-1(ju145) mutant; Caenorhabditis elegans; RNA-Seq	Caenorhabditis elegans	Illumina HiSeq 2000	GEO	SRP047293	Differential gene expression in ahr-1 mutants compared to wild-type C. elegans	SRS703904		6798.97	1	54013714	10802742800		RNA-Seq	TRANSCRIPTOMIC	cDNA
SRR1582059	SRX707276	GSM1508762: N2_polyA-1; Caenorhabditis elegans; RNA-Seq	Caenorhabditis elegans	Illumina HiSeq 2000	GEO	SRP047336	TDP-1, the C. elegans ortholog of TDP-43, limits the accumulation of double stranded RNA	SRS706511	143787903	21855761256		RNA-Seq	TRANSCRIPTOMIC	cDNA
SRR1582060	SRX707277	GSM1508763: N2_polyA-2; Caenorhabditis elegans; RNA-Seq	Caenorhabditis elegans	Illumina HiSeq 2000	GEO	SRP047336	TDP-1, the C. elegans ortholog of TDP-43, limits the accumulation of double stranded RNA	SRS706512	98862185	9985080685		RNA-Seq	TRANSCRIPTOMIC	cDNA
SRR1582061	SRX707278	GSM1508764: N2_polyA-3; Caenorhabditis elegans; RNA-Seq	Caenorhabditis elegans	Illumina HiSeq 2000	GEO	SRP047336	TDP-1, the C. elegans ortholog of TDP-43, limits the accumulation of double stranded RNA	SRS706513	81697262	8251423462		RNA-Seq	TRANSCRIPTOMIC	cDNA
SRR1582062	SRX707279	GSM1508765: tdp1_polyA-1; Caenorhabditis elegans; RNA-Seq	Caenorhabditis elegans	Illumina HiSeq 2000	GEO	SRP047336	TDP-1, the C. elegans ortholog of TDP-43, limits the accumulation of double stranded RNA	SRS706514		12991.7	1	144703253	21994894456		RNA-Seq	TRANSCRIPTOMIC	cDNA
SRR1582063	SRX707280	GSM1508766: tdp1_polyA-2; Caenorhabditis elegans; RNA-Seq	Caenorhabditis elegans	Illumina HiSeq 2000	GEO	SRP047336	TDP-1, the C. elegans ortholog of TDP-43, limits the accumulation of double stranded RNA	SRS706515		3454.95	1	85324825	8617807325		RNA-Seq	TRANSCRIPTOMIC	cDNA
SRR1582064	SRX707281	GSM1508767: tdp1_polyA-3; Caenorhabditis elegans; RNA-Seq	Caenorhabditis elegans	Illumina HiSeq 2000	GEO	SRP047336	TDP-1, the C. elegans ortholog of TDP-43, limits the accumulation of double stranded RNA	SRS706516		3377.74	1	83061381	8389199481		RNA-Seq	TRANSCRIPTOMIC	cDNA
SRR1582065	SRX707282	GSM1508768: N2_input; Caenorhabditis elegans; RNA-Seq	Caenorhabditis elegans	Illumina HiSeq 2000	GEO	SRP047336	TDP-1, the C. elegans ortholog of TDP-43, limits the accumulation of double stranded RNA	SRS706517	70046116	7074657716		RNA-Seq	TRANSCRIPTOMIC	cDNA
SRR1582066	SRX707283	GSM1508769: N2_J2-1; Caenorhabditis elegans; RNA-Seq	Caenorhabditis elegans	Illumina HiSeq 2000	GEO	SRP047336	TDP-1, the C. elegans ortholog of TDP-43, limits the accumulation of double stranded RNA	SRS706518	40752380	4115990380		RNA-Seq	TRANSCRIPTOMIC	cDNA
SRR1582067	SRX707284	GSM1508770: N2_J2-2; Caenorhabditis elegans; RNA-Seq	Caenorhabditis elegans	Illumina HiSeq 2000	GEO	SRP047336	TDP-1, the C. elegans ortholog of TDP-43, limits the accumulation of double stranded RNA	SRS706519	41431902	4184622102		RNA-Seq	TRANSCRIPTOMIC	cDNA
SRR1582068	SRX707285	GSM1508771: N2_J2-3; Caenorhabditis elegans; RNA-Seq	Caenorhabditis elegans	Illumina HiSeq 2000	GEO	SRP047336	TDP-1, the C. elegans ortholog of TDP-43, limits the accumulation of double stranded RNA	SRS706520	33502590	3383761590		RNA-Seq	TRANSCRIPTOMIC	cDNA
SRR1582069	SRX707286	GSM1508772: tdp1_input; Caenorhabditis elegans; RNA-Seq	Caenorhabditis elegans	Illumina HiSeq 2000	GEO	SRP047336	TDP-1, the C. elegans ortholog of TDP-43, limits the accumulation of double stranded RNA	SRS706521		4541.59	1	108441552	10952596752		RNA-Seq	TRANSCRIPTOMIC	cDNA
SRR1582070	SRX707287	GSM1508773: tdp1_J2-1; Caenorhabditis elegans; RNA-Seq	Caenorhabditis elegans	Illumina HiSeq 2000	GEO	SRP047336	TDP-1, the C. elegans ortholog of TDP-43, limits the accumulation of double stranded RNA	SRS706522		2382.23	1	54477862	5502264062		RNA-Seq	TRANSCRIPTOMIC	cDNA
SRR1582071	SRX707288	GSM1508774: tdp1_J2-2; Caenorhabditis elegans; RNA-Seq	Caenorhabditis elegans	Illumina HiSeq 2000	GEO	SRP047336	TDP-1, the C. elegans ortholog of TDP-43, limits the accumulation of double stranded RNA	SRS706523		1816.61	1	41320426	4173363026		RNA-Seq	TRANSCRIPTOMIC	cDNA
SRR1582072	SRX707289	GSM1508775: tdp1_J2-3; Caenorhabditis elegans; RNA-Seq	Caenorhabditis elegans	Illumina HiSeq 2000	GEO	SRP047336	TDP-1, the C. elegans ortholog of TDP-43, limits the accumulation of double stranded RNA	SRS706524		1477.21	1	33994703	3433465003		RNA-Seq	TRANSCRIPTOMIC	cDNA
SRR1582073	SRX707290	GSM1508776: ADR2_total-1; Caenorhabditis elegans; RNA-Seq	Caenorhabditis elegans	Illumina HiSeq 2000	GEO	SRP047336	TDP-1, the C. elegans ortholog of TDP-43, limits the accumulation of double stranded RNA	SRS706525		10306.8	1	87211981	17616820162		RNA-Seq	TRANSCRIPTOMIC	cDNA
SRR1582074	SRX707291	GSM1508777: N2_total-1; Caenorhabditis elegans; RNA-Seq	Caenorhabditis elegans	Illumina HiSeq 2000	GEO	SRP047336	TDP-1, the C. elegans ortholog of TDP-43, limits the accumulation of double stranded RNA	SRS706526	85146261	17199544722		RNA-Seq	TRANSCRIPTOMIC	cDNA
SRR1582075	SRX707292	GSM1508778: N2_total-2; Caenorhabditis elegans; RNA-Seq	Caenorhabditis elegans	Illumina HiSeq 2000	GEO	SRP047336	TDP-1, the C. elegans ortholog of TDP-43, limits the accumulation of double stranded RNA	SRS706527	43331188	8666237600		RNA-Seq	TRANSCRIPTOMIC	cDNA
SRR1582076	SRX707293	GSM1508779: N2_total-3; Caenorhabditis elegans; RNA-Seq	Caenorhabditis elegans	Illumina HiSeq 2000	GEO	SRP047336	TDP-1, the C. elegans ortholog of TDP-43, limits the accumulation of double stranded RNA	SRS706528	89090759	17818151800		RNA-Seq	TRANSCRIPTOMIC	cDNA
SRR1582077	SRX707294	GSM1508780: tdp1_total-1; Caenorhabditis elegans; RNA-Seq	Caenorhabditis elegans	Illumina HiSeq 2000	GEO	SRP047336	TDP-1, the C. elegans ortholog of TDP-43, limits the accumulation of double stranded RNA	SRS706529		9820.45	1	82759535	16717426070		RNA-Seq	TRANSCRIPTOMIC	cDNA
SRR1582078	SRX707295	GSM1508781: tdp1_total-2; Caenorhabditis elegans; RNA-Seq	Caenorhabditis elegans	Illumina HiSeq 2000	GEO	SRP047336	TDP-1, the C. elegans ortholog of TDP-43, limits the accumulation of double stranded RNA	SRS706530		4720.76	1	37065178	7413035600		RNA-Seq	TRANSCRIPTOMIC	cDNA
SRR1582079	SRX707296	GSM1508782: tdp1_total-3; Caenorhabditis elegans; RNA-Seq	Caenorhabditis elegans	Illumina HiSeq 2000	GEO	SRP047336	TDP-1, the C. elegans ortholog of TDP-43, limits the accumulation of double stranded RNA	SRS706531		3094.71	1	24212675	4842535000		RNA-Seq	TRANSCRIPTOMIC	cDNA
SRR1585277	SRX709649	GSM1511926: Control; Caenorhabditis elegans; RNA-Seq	Caenorhabditis elegans	Illumina HiSeq 2000	GEO	SRP047464	The RtcB RNA ligase is an essential component of the metazoan unfolded protein response.	SRS708677	40302838	6126031376		RNA-Seq	TRANSCRIPTOMIC	cDNA
SRR1585278	SRX709650	GSM1511927: Control_Tm; Caenorhabditis elegans; RNA-Seq	Caenorhabditis elegans	Illumina HiSeq 2000	GEO	SRP047464	The RtcB RNA ligase is an essential component of the metazoan unfolded protein response.	SRS708678	50516835	7678558920		RNA-Seq	TRANSCRIPTOMIC	cDNA
SRR1585279	SRX709651	GSM1511928: RtcB-null; Caenorhabditis elegans; RNA-Seq	Caenorhabditis elegans	Illumina HiSeq 2000	GEO	SRP047464	The RtcB RNA ligase is an essential component of the metazoan unfolded protein response.	SRS708679		4461.64	1	46094277	7006330104		RNA-Seq	TRANSCRIPTOMIC	cDNA
SRR1585280	SRX709652	GSM1511929: RtcB-null_Tm; Caenorhabditis elegans; RNA-Seq	Caenorhabditis elegans	Illumina HiSeq 2000	GEO	SRP047464	The RtcB RNA ligase is an essential component of the metazoan unfolded protein response.	SRS708680		4574.92	1	47059209	7152999768		RNA-Seq	TRANSCRIPTOMIC	cDNA
SRR1611854	SRX732432	Illumina sequencing of C. elegans LX837 larval L1 NSML and NSMR neurons 100bp PE RW0001	Caenorhabditis elegans	Illumina HiSeq 2000	UWGS-RW	SRP000401	Deep sequencing of the Caenorhabditis elegans transcriptome using RNA isolated from various developmental stages under various experimental conditions RW0001	SRS308486		694.14	1	5982820	1196564000	DMM386-NSML_NSMR-nrn_L1-DSN	RNA-Seq	TRANSCRIPTOMIC	cDNA
SRR1630867	SRX743652	GSM1532337: glp1_D2_rep1_parallel_ChIPseqrep3_mRNASeq; Caenorhabditis elegans; RNA-Seq	Caenorhabditis elegans	Illumina HiSeq 2000	GEO	SRP049280	Tri-methylation of lysine 36 on H3 restricts gene expression variation during aging and impacts lifespan	SRS731353		2291.62	1	69283773	3533472423		RNA-Seq	TRANSCRIPTOMIC	cDNA
SRR1630868	SRX743653	GSM1532338: glp1_D2_rep2_parallel_ChIPseqrep4_mRNASeq; Caenorhabditis elegans; RNA-Seq	Caenorhabditis elegans	Illumina HiSeq 2000	GEO	SRP049280	Tri-methylation of lysine 36 on H3 restricts gene expression variation during aging and impacts lifespan	SRS731354		2641.8	1	78396703	3998231853		RNA-Seq	TRANSCRIPTOMIC	cDNA
SRR1630869	SRX743654	GSM1532339: glp1_D12_rep1_parallel_ChIPseqrep3_mRNASeq; Caenorhabditis elegans; RNA-Seq	Caenorhabditis elegans	Illumina HiSeq 2000	GEO	SRP049280	Tri-methylation of lysine 36 on H3 restricts gene expression variation during aging and impacts lifespan	SRS731355		2082.61	1	63014024	3213715224		RNA-Seq	TRANSCRIPTOMIC	cDNA
SRR1630870	SRX743655	GSM1532340: glp1_D12_rep2_parallel_ChIPseqrep4_mRNASeq; Caenorhabditis elegans; RNA-Seq	Caenorhabditis elegans	Illumina HiSeq 2000	GEO	SRP049280	Tri-methylation of lysine 36 on H3 restricts gene expression variation during aging and impacts lifespan	SRS731357		3043.6	1	89970038	4588471938		RNA-Seq	TRANSCRIPTOMIC	cDNA
SRR1630871	SRX743656	GSM1532341: glp1_L4440_D2_rep1_mRNASeq; Caenorhabditis elegans; RNA-Seq	Caenorhabditis elegans	Illumina HiSeq 2000	GEO	SRP049280	Tri-methylation of lysine 36 on H3 restricts gene expression variation during aging and impacts lifespan	SRS731359		711.47	1	21285744	1085572944		RNA-Seq	TRANSCRIPTOMIC	cDNA
SRR1630872	SRX743657	GSM1532342: glp1_L4440_D2_rep2_mRNASeq; Caenorhabditis elegans; RNA-Seq	Caenorhabditis elegans	Illumina HiSeq 2000	GEO	SRP049280	Tri-methylation of lysine 36 on H3 restricts gene expression variation during aging and impacts lifespan	SRS731358		665.94	1	19927276	1016291076		RNA-Seq	TRANSCRIPTOMIC	cDNA
SRR1630873	SRX743658	GSM1532343: glp1_L4440_D12_rep1_mRNASeq; Caenorhabditis elegans; RNA-Seq	Caenorhabditis elegans	Illumina HiSeq 2000	GEO	SRP049280	Tri-methylation of lysine 36 on H3 restricts gene expression variation during aging and impacts lifespan	SRS731360		640.48	1	19234915	980980665		RNA-Seq	TRANSCRIPTOMIC	cDNA
SRR1630874	SRX743659	GSM1532344: glp1_L4440_D12_rep2_mRNASeq; Caenorhabditis elegans; RNA-Seq	Caenorhabditis elegans	Illumina HiSeq 2000	GEO	SRP049280	Tri-methylation of lysine 36 on H3 restricts gene expression variation during aging and impacts lifespan	SRS731362		723.38	1	21551023	1099102173		RNA-Seq	TRANSCRIPTOMIC	cDNA
SRR1630875	SRX743660	GSM1532345: glp1_met1RNAi_D2_rep1_mRNASeq; Caenorhabditis elegans; RNA-Seq	Caenorhabditis elegans	Illumina HiSeq 2000	GEO	SRP049280	Tri-methylation of lysine 36 on H3 restricts gene expression variation during aging and impacts lifespan	SRS731361		690.65	1	20664864	1053908064		RNA-Seq	TRANSCRIPTOMIC	cDNA
SRR1630876	SRX743661	GSM1532346: glp1_met1RNAi_D2_rep2_mRNASeq; Caenorhabditis elegans; RNA-Seq	Caenorhabditis elegans	Illumina HiSeq 2000	GEO	SRP049280	Tri-methylation of lysine 36 on H3 restricts gene expression variation during aging and impacts lifespan	SRS731363		688.32	1	20625252	1051887852		RNA-Seq	TRANSCRIPTOMIC	cDNA
SRR1630877	SRX743662	GSM1532347: glp1_met1RNAi_D12_rep1_mRNASeq; Caenorhabditis elegans; RNA-Seq	Caenorhabditis elegans	Illumina HiSeq 2000	GEO	SRP049280	Tri-methylation of lysine 36 on H3 restricts gene expression variation during aging and impacts lifespan	SRS731364		665.4	1	19901992	1015001592		RNA-Seq	TRANSCRIPTOMIC	cDNA
SRR1630878	SRX743663	GSM1532348: glp1_met1RNAI_D12_rep2_mRNASeq; Caenorhabditis elegans; RNA-Seq	Caenorhabditis elegans	Illumina HiSeq 2000	GEO	SRP049280	Tri-methylation of lysine 36 on H3 restricts gene expression variation during aging and impacts lifespan	SRS731365		618.28	1	18475973	942274623		RNA-Seq	TRANSCRIPTOMIC	cDNA
[truncated: 105 more rows]
