# Supplementary figures and images for: Quantitative RNA-seq meta-analysis of alternative exon usage in C. elegans
Source: PubMed Central journal article supplement — Genome Res. 2017 Dec;27(12):2120–8. doi: 10.1101/gr.224626.117 (PMC5741048; doi:10.1101/gr.224626.117), 2017-12

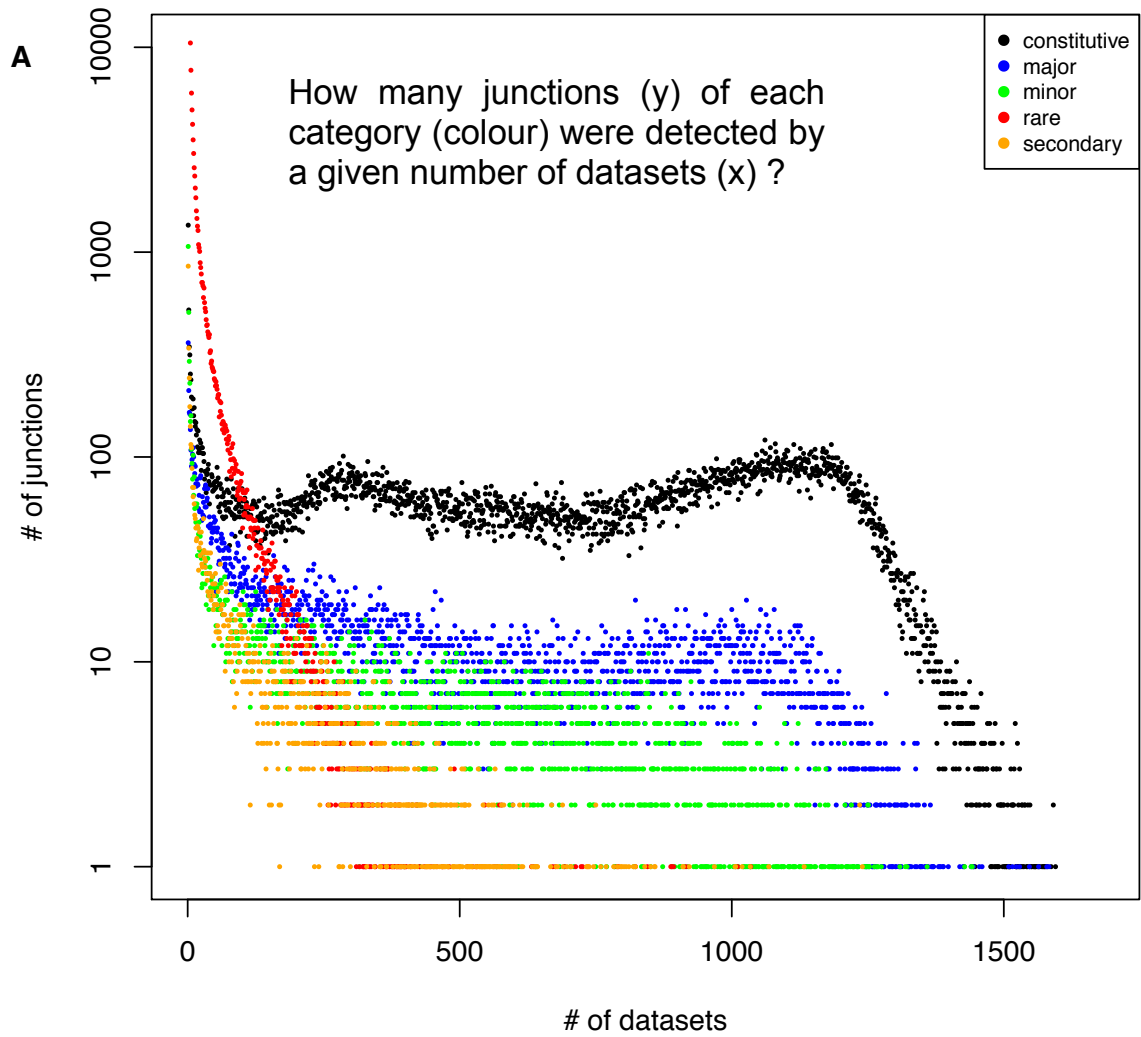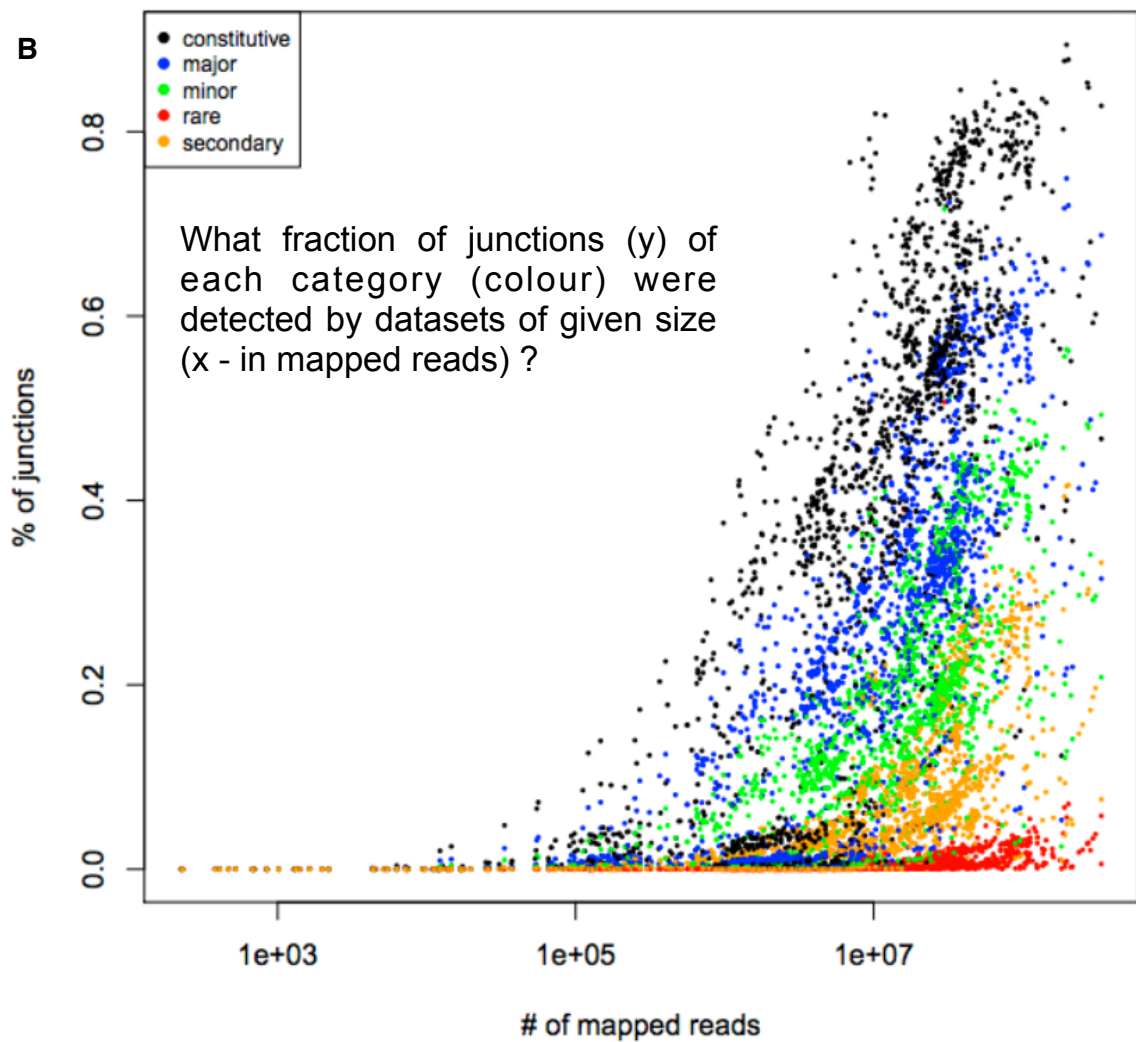

Supplement: supp_gr.224626.117_Supplemental_Fig_S1.pdf [file supp_gr.224626.117_Supplemental_Fig_S1.pdf]

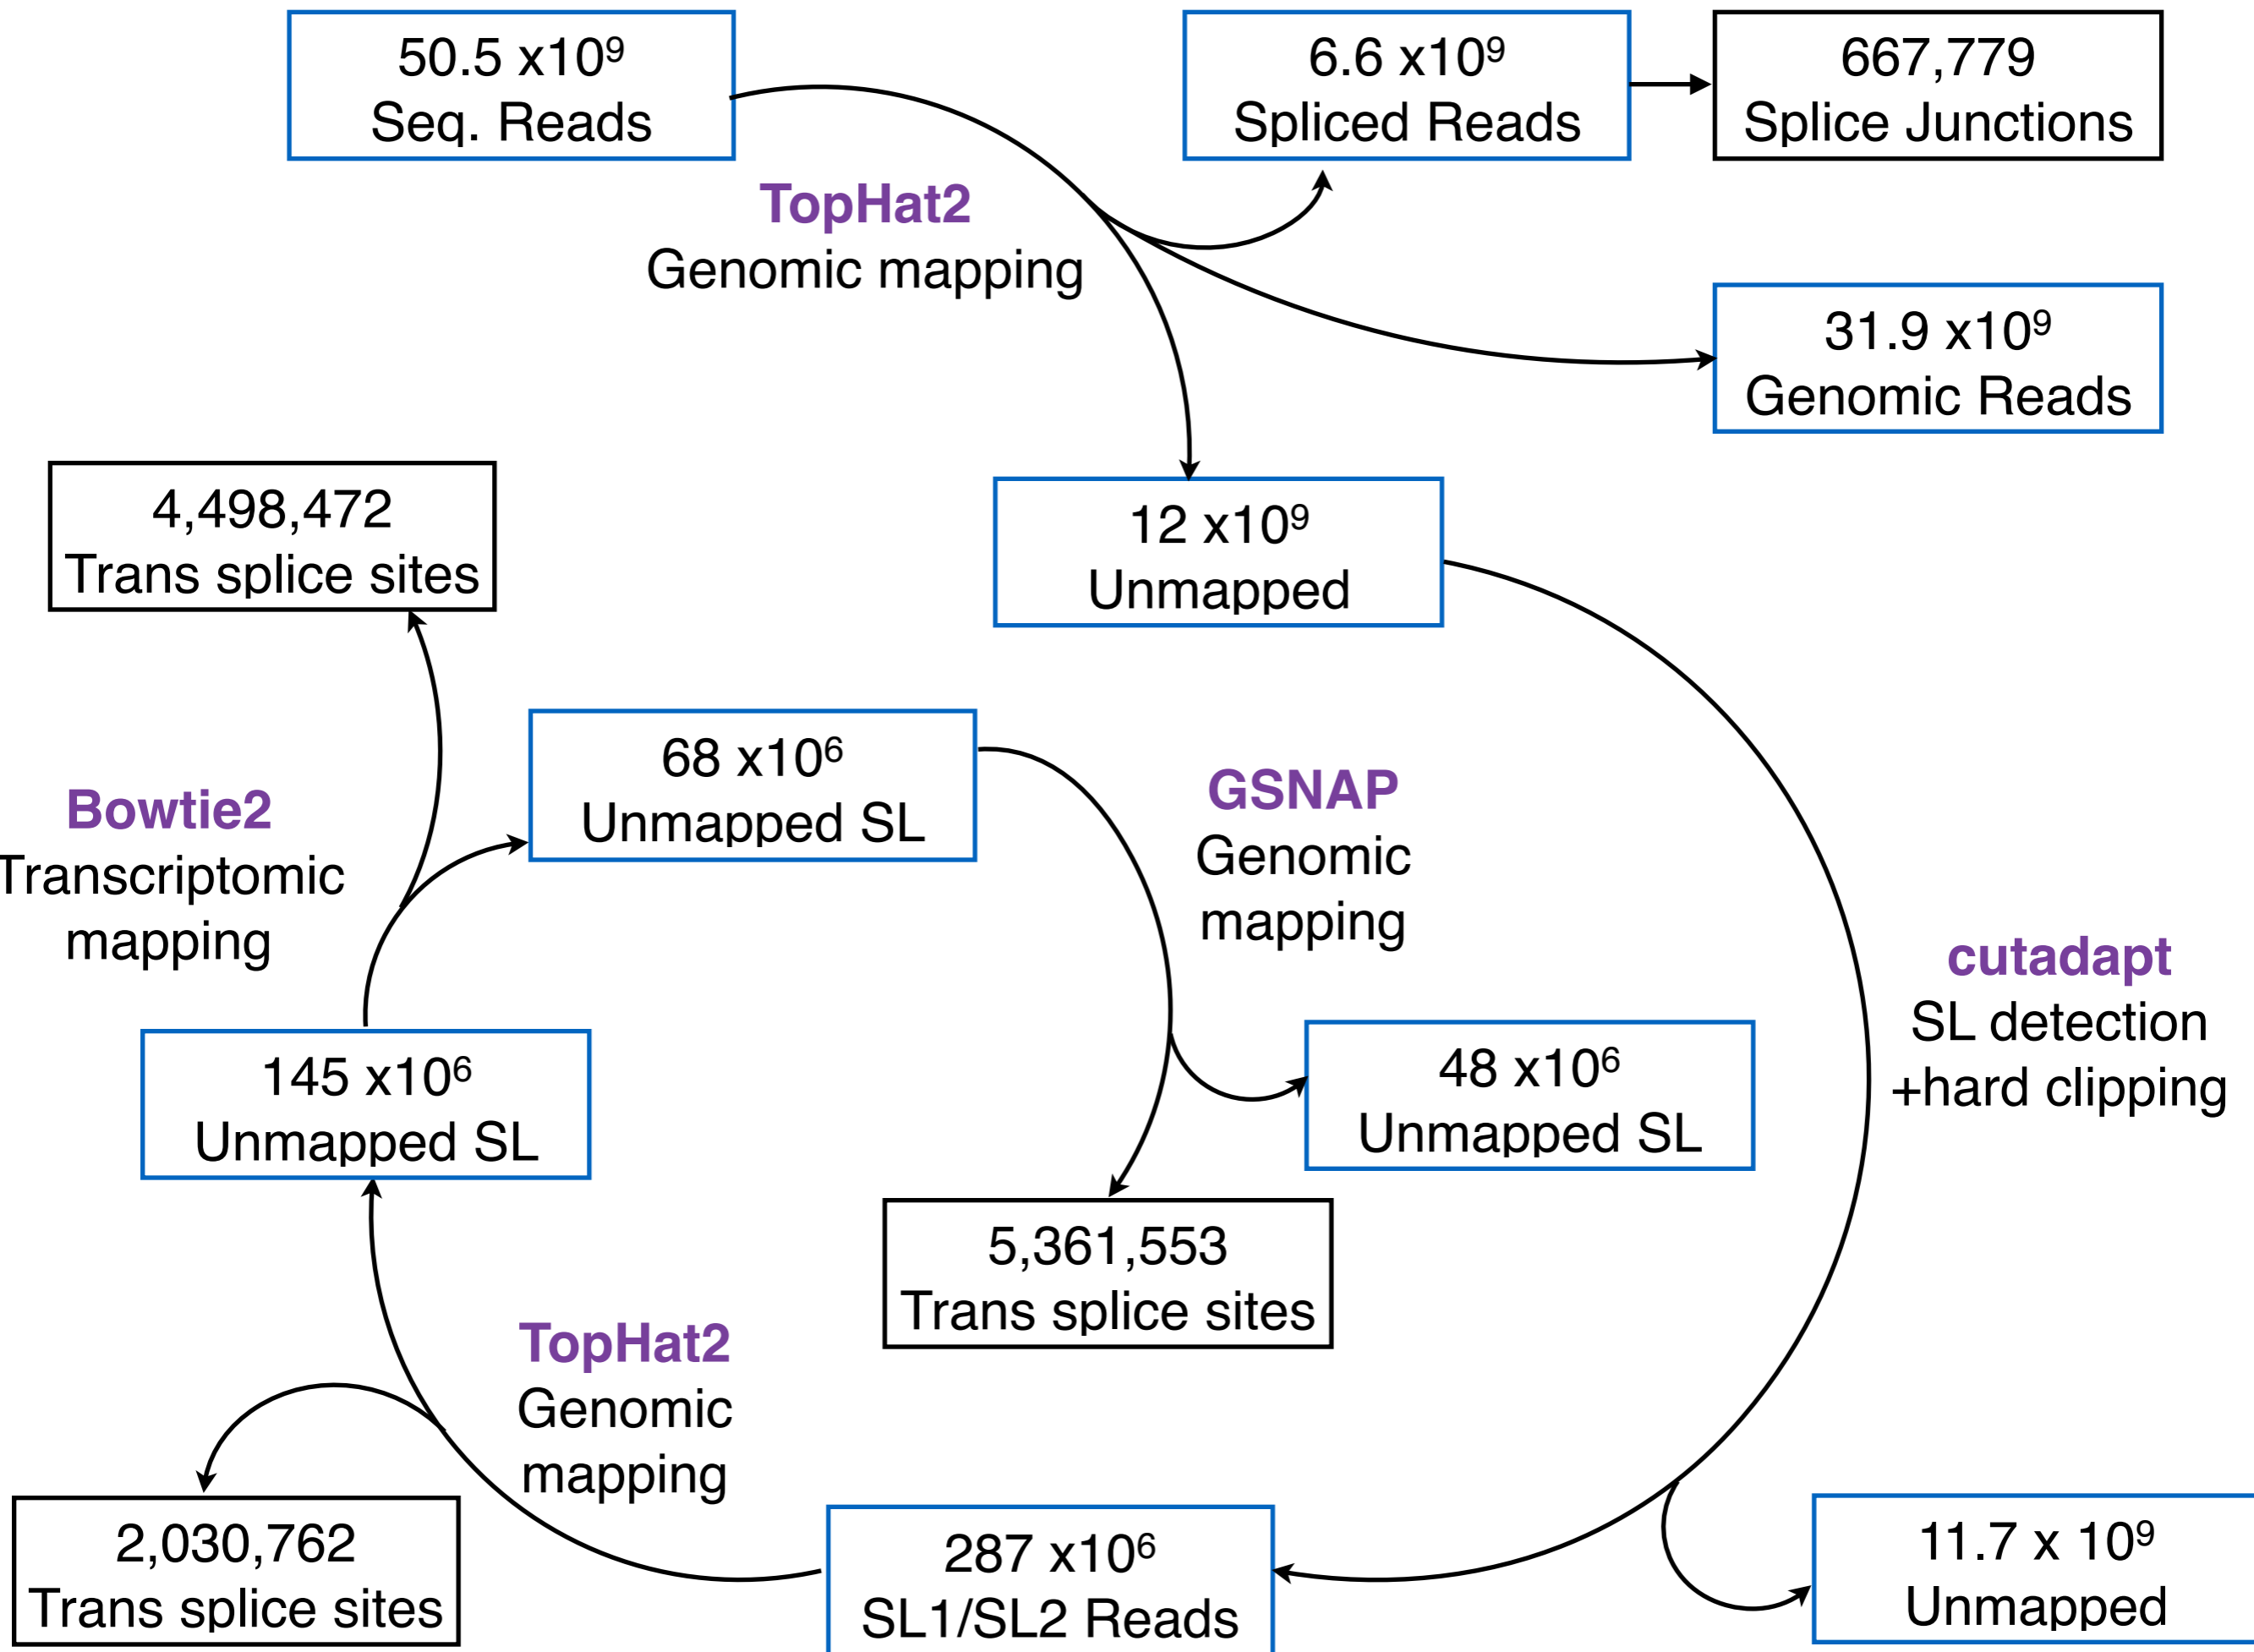

Supplement: supp_gr.224626.117_Supplemental_Fig_S3.pdf [file supp_gr.224626.117_Supplemental_Fig_S3.pdf]
